# Supplementary material for: Identification and Utilization of a Chemical Probe to Interrogate the Roles of PIKfyve in the Lifecycle of β-Coronaviruses
Source: PubMed Central journal article supplement — J Med Chem. 2022 Sep 16;65(19):12860–82. doi: 10.1021/acs.jmedchem.2c00697 (PMC9574855; doi:10.1021/acs.jmedchem.2c00697), 2022-09-16

## Supporting Information

### Identification and Utilization of a Chemical Probe to Interrogate the Roles of PIKfyve in the Lifecycle of $\beta$ -Coronaviruses

David H. Drewry<sup>1,2,†</sup>, Frances M. Potjewyd<sup>1,†</sup>, Armin Bayati<sup>3</sup>, Jeffery L. Smith<sup>1</sup>, Rebekah J. Dickmander<sup>2,4,5,6</sup>, Stefanie Howell<sup>1</sup>, Sharon Taft-Benz<sup>4,7</sup>, Sophia M. Min<sup>1</sup>, Mohammad Anwar Hossain<sup>1</sup>, Mark Heise<sup>4,7</sup>, Peter S. McPherson<sup>3</sup>, Nathaniel J. Moorman<sup>2,4,5</sup>, Alison D. Axtman<sup>\*,1</sup>

<sup>1</sup> Structural Genomics Consortium, UNC Eshelman School of Pharmacy, University of North Carolina at Chapel Hill, Chapel Hill, NC, 27599, USA

<sup>2</sup> UNC Lineberger Comprehensive Cancer Center, School of Medicine, University of North Carolina at Chapel Hill, Chapel Hill, NC, 27599, USA

<sup>3</sup> Structural Genomics Consortium, Department of Neurology and Neurosurgery, Montreal Neurological Institute, McGill University, Montreal, QC, H3A 2B4, Canada

<sup>4</sup> Rapidly Emerging Antiviral Drug Development Initiative (READDI), Chapel Hill, NC, 27599, USA

<sup>5</sup> Department of Microbiology & Immunology, University of North Carolina at Chapel Hill, Chapel Hill, NC, 27599, USA

<sup>6</sup> Department of Chemistry, University of North Carolina at Chapel Hill, Chapel Hill, NC, 27599, USA

<sup>7</sup> Department of Genetics, University of North Carolina at Chapel Hill, Chapel Hill, NC, 27599, USA

† Authors contributed equally

\* Corresponding Author E-mail: [alison.axtman@unc.edu](mailto:alison.axtman@unc.edu)

## Table of Contents

|                                             |          |
|---------------------------------------------|----------|
| Table S1                                    | S2       |
| Table S2                                    | S2       |
| Table S3                                    | S2–S3    |
| Figure S1                                   | S3       |
| Figure S2                                   | S4       |
| Figure S3                                   | S5       |
| Figure S4                                   | S6       |
| Figure S5                                   | S7       |
| Figure S6                                   | S8       |
| Figure S7                                   | S9       |
| Purity traces and spectra for all compounds | S10–S122 |

**Table S1.** Orthogonal assay results for analog **8**

| Kinase                       | DiscoverX PoC value | Assay format (source)                         | IC <sub>50</sub> value (nM) |
|------------------------------|---------------------|-----------------------------------------------|-----------------------------|
| PIP5K1C                      | 0                   | Enzymatic (Eurofins)                          | 160                         |
| PIKFYVE                      | 0                   | Enzymatic (SignalChem) and NanoBRET (SGC-UNC) | 9.3 and 11.4                |
| TYK2(JH2domain-pseudokinase) | 10                  | NanoBRET (RBC)                                | >10000                      |
| MYLK4                        | 14                  | Enzymatic (RBC)                               | 35                          |
| PIP4K2C                      | 15                  | NanoBRET (SGC-UNC)                            | 76.6                        |
| RIPK5                        | 23                  | Enzymatic (RBC)                               | 3900                        |

**Table S2.** Enzymatic profiling of analogs **8** and **17** in targeted kinase panel

| Compound  | PoC at 1 $\mu$ M <sup>[a]</sup> |        |       |       |      |      |                     |      |       |       |       |       |       |       |       |       |       |
|-----------|---------------------------------|--------|-------|-------|------|------|---------------------|------|-------|-------|-------|-------|-------|-------|-------|-------|-------|
|           | HIPK1                           | MAP4K5 | MARK3 | MARK4 | PAK3 | PAK4 | PAK5 <sup>[b]</sup> | PAK6 | TAOK1 | TAOK2 | TAOK3 | TSSK1 | TSSK2 | TSSK3 | TSSK4 | TTBK1 | TTBK2 |
| <b>8</b>  | 73                              | 47     | 90    | 73    | 98   | 76   | 79                  | 97   | 87    | 77    | 88    | 79    | 68    | 132   | 56    | 97    | 81    |
| <b>17</b> | 88                              | 14     | 70    | 97    | 81   | 72   | 89                  | 77   | 72    | 79    | 77    | 82    | 77    | 79    | 72    | 92    | 98    |

<sup>a</sup> Compounds tested at a single concentration (1  $\mu$ M) in duplicate

**Table S3.** Orthogonal assay results for analog **17**

| Kinase  | DiscoverX PoC value | Assay format (source)                         | IC <sub>50</sub> or K <sub>d</sub> value (nM) |
|---------|---------------------|-----------------------------------------------|-----------------------------------------------|
| PIKFYVE | 0.1                 | Enzymatic (SignalChem) and NanoBRET (SGC-UNC) | 6.9 and 4.01                                  |
| MYLK4   | 1.8                 | Enzymatic (RBC) and NanoBRET (SGC-UNC)        | 66 and 265                                    |
| MEK1    | 4.5                 | Enzymatic (Eurofins)                          | >10000                                        |
| RIPK5   | 5.2                 | Enzymatic (RBC)                               | >10000                                        |
| IRAK3   | 9.2                 | NT <sup>a</sup>                               | -                                             |
| MEK2    | 9.6                 | Enzymatic (Eurofins)                          | >10000                                        |
| DYRK1A  | 9.9                 | Enzymatic (Eurofins)                          | 2040                                          |
| YSK4    | 9.9                 | Enzymatic (RBC)                               | 4020                                          |
| ULK3    | 11                  | Enzymatic (Eurofins)                          | >10000                                        |
| MEK4    | 12                  | Enzymatic (Eurofins)                          | >10000                                        |
| HASPIN  | 13                  | Enzymatic (Eurofins)                          | 1400                                          |
| STK16   | 14                  | Enzymatic (Eurofins)                          | 560                                           |

|         |    |                                             |                 |
|---------|----|---------------------------------------------|-----------------|
| CLK2    | 20 | Enzymatic (Eurofins)                        | 290             |
| CDK7    | 20 | Enzymatic (Eurofins)                        | >10000          |
| IRAK4   | 21 | Enzymatic (Eurofins)                        | 4500            |
| AURKB   | 23 | Enzymatic (Eurofins)                        | 1400            |
| DYRK1B  | 26 | Enzymatic (Eurofins)                        | 380             |
| CLK1    | 30 | Enzymatic (Eurofins)                        | 420             |
| RIOK2   | 32 | NT                                          | -               |
| CLK4    | 34 | Enzymatic (Eurofins)                        | 440             |
| PIP4K2C | 53 | NanoBRET (SGC-UNC) and binding (DiscoverX)  | >10000 and 1900 |
| MAP4K5  | 96 | Enzymatic (Eurofins) and NanoBRET (SGC-UNC) | 89 and >10000   |

<sup>a</sup> NT: not tested, no assay available.

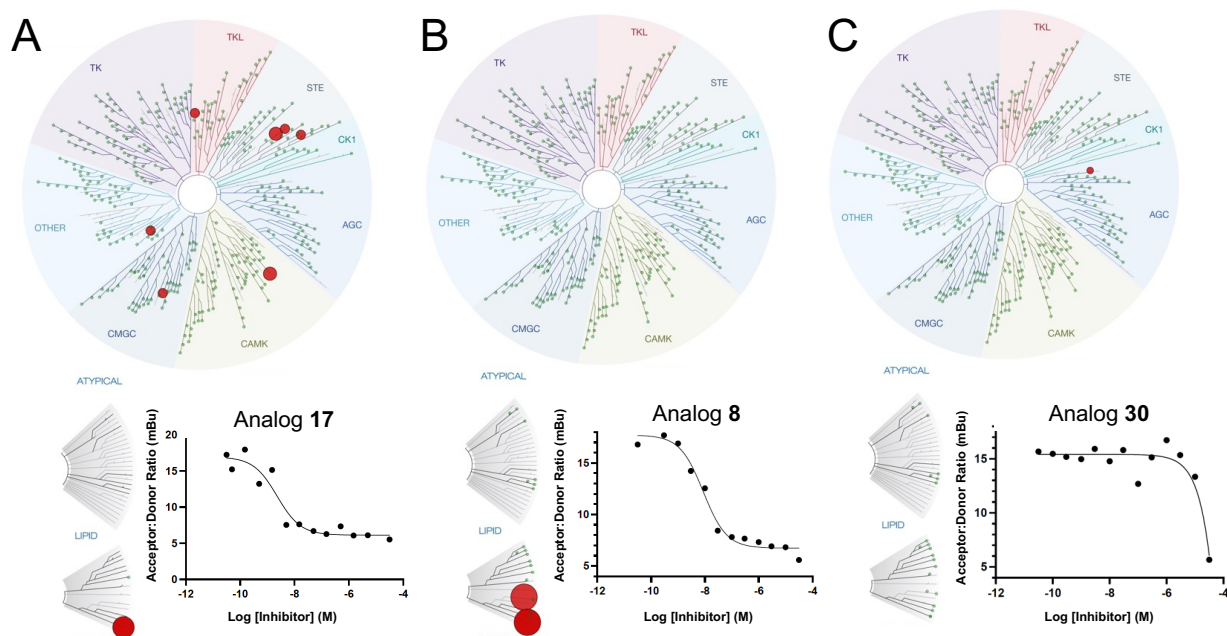

**Figure S1.** Visualization of DiscoverX *scanMAX* results and PIKfyve NanoBRET curves for chemical probe candidates (A) **17** ( $S_{10}$  ( $1 \mu\text{M}$ )) and (B) **8** ( $S_{10}$  ( $1 \mu\text{M}$ )) and (C) negative control compound **30** ( $S_{35}$  ( $1 \mu\text{M}$ )).

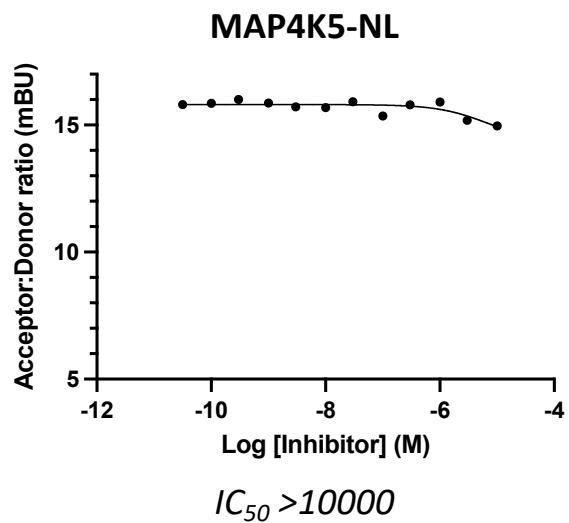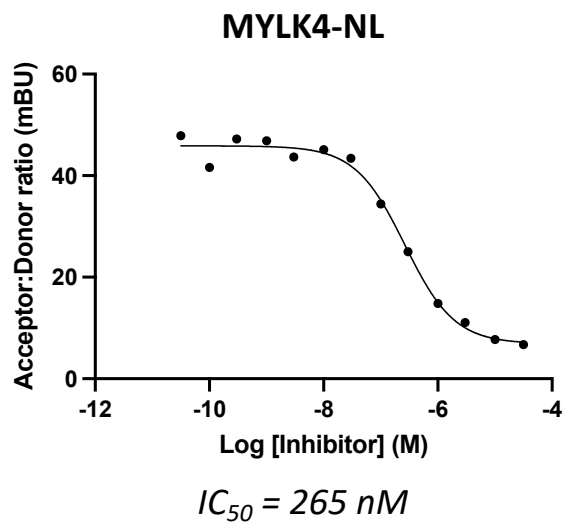

**Figure S2.** NanoBRET curves and corresponding  $IC_{50}$  values for chemical probe candidate **17** versus most potent off-target kinases.

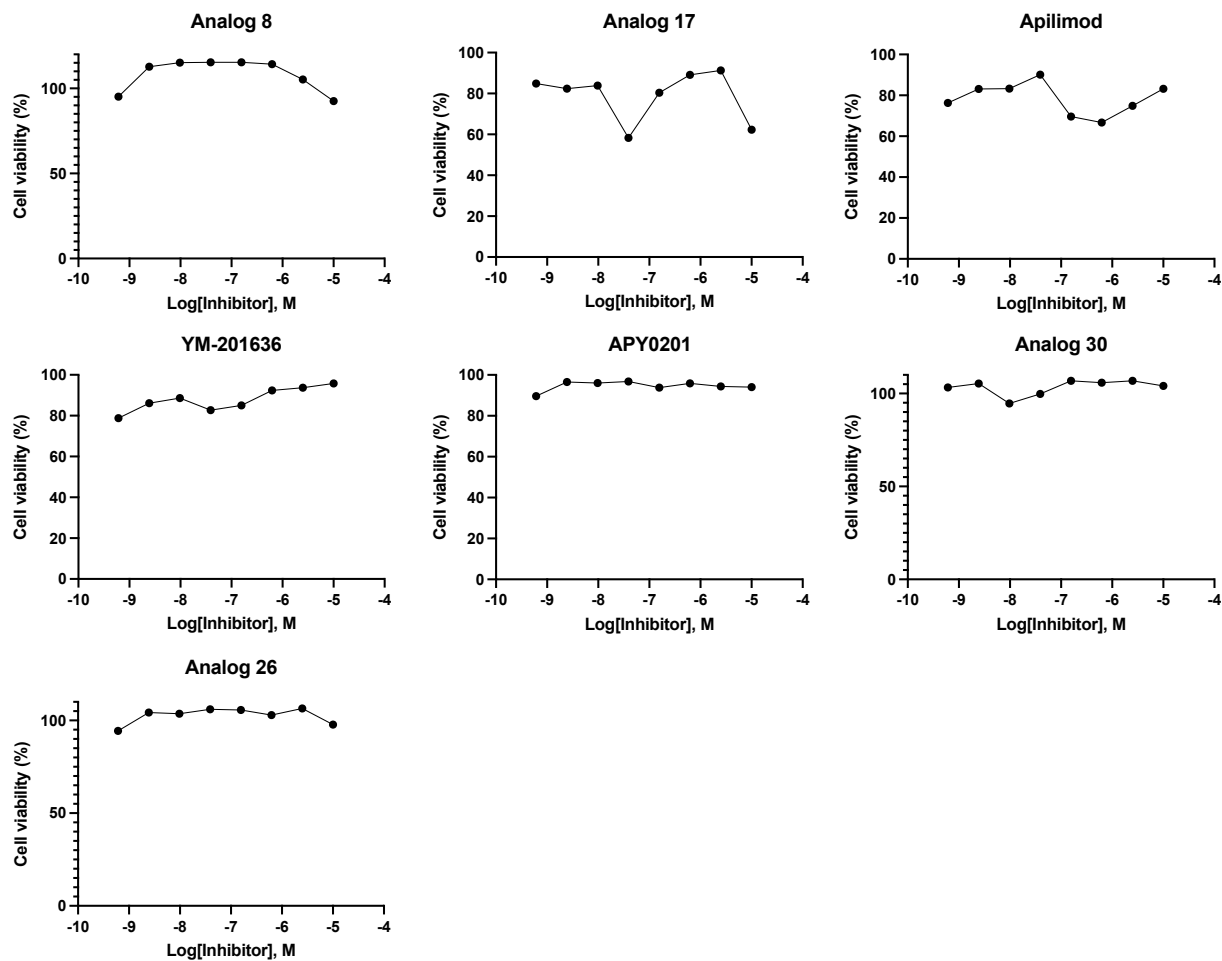

**Figure S3.** Cell viability data determined by LDH assay in DBT cells after 10 h of continuous treatment. Plot of average values from  $n = 3$  for compounds that exhibit  $IC_{50} < 100$  nM in MHV-nLuc assay and negative control **30**.

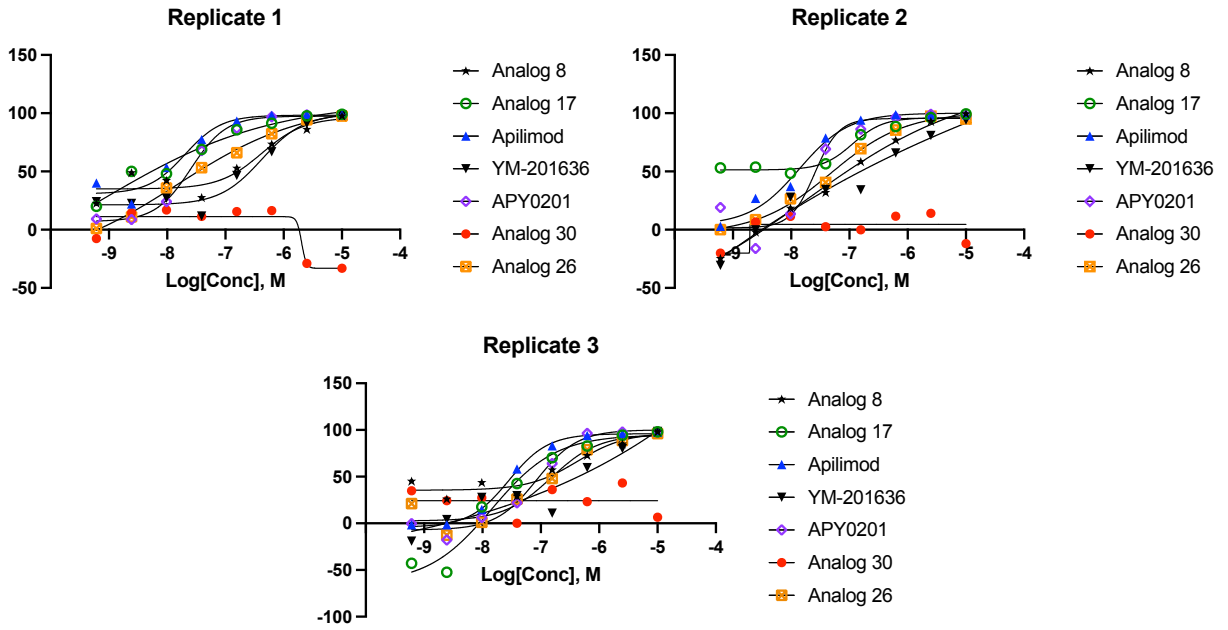

**Figure S4.** Individual replicates corresponding to effect of PIKfyve inhibitors on replication of MHV-nLuc in DBT cells in Figure 4A.

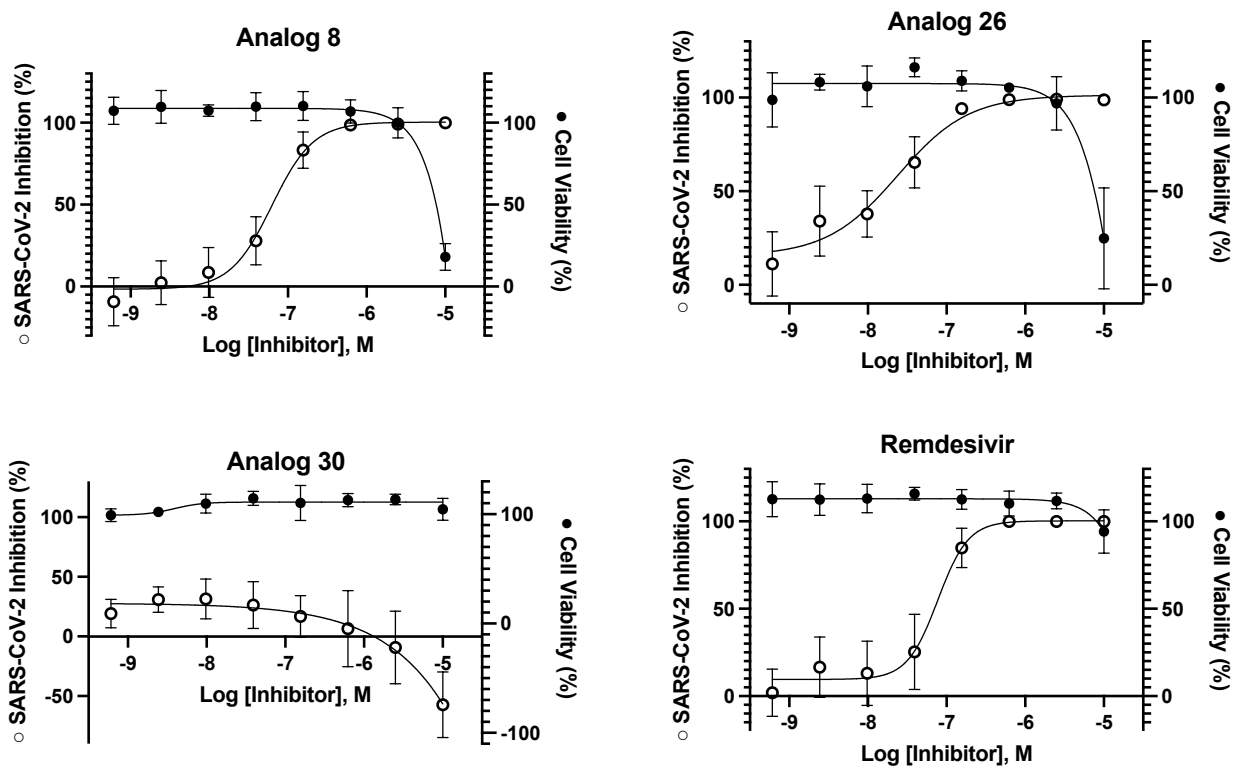

**Figure S5.** Effect of indolyl pyrimidinamines and remdesivir (positive control) on viral replication (open circles) in A549–ACE2 cells infected with SARS-CoV-2-nLuc (n = 4). Cell viability determined by LDH assay (closed circles) in A549–ACE2 cells (n = 2). These individual graphs correspond with the compounds included in Figure 4C. Error bars represent SEM.

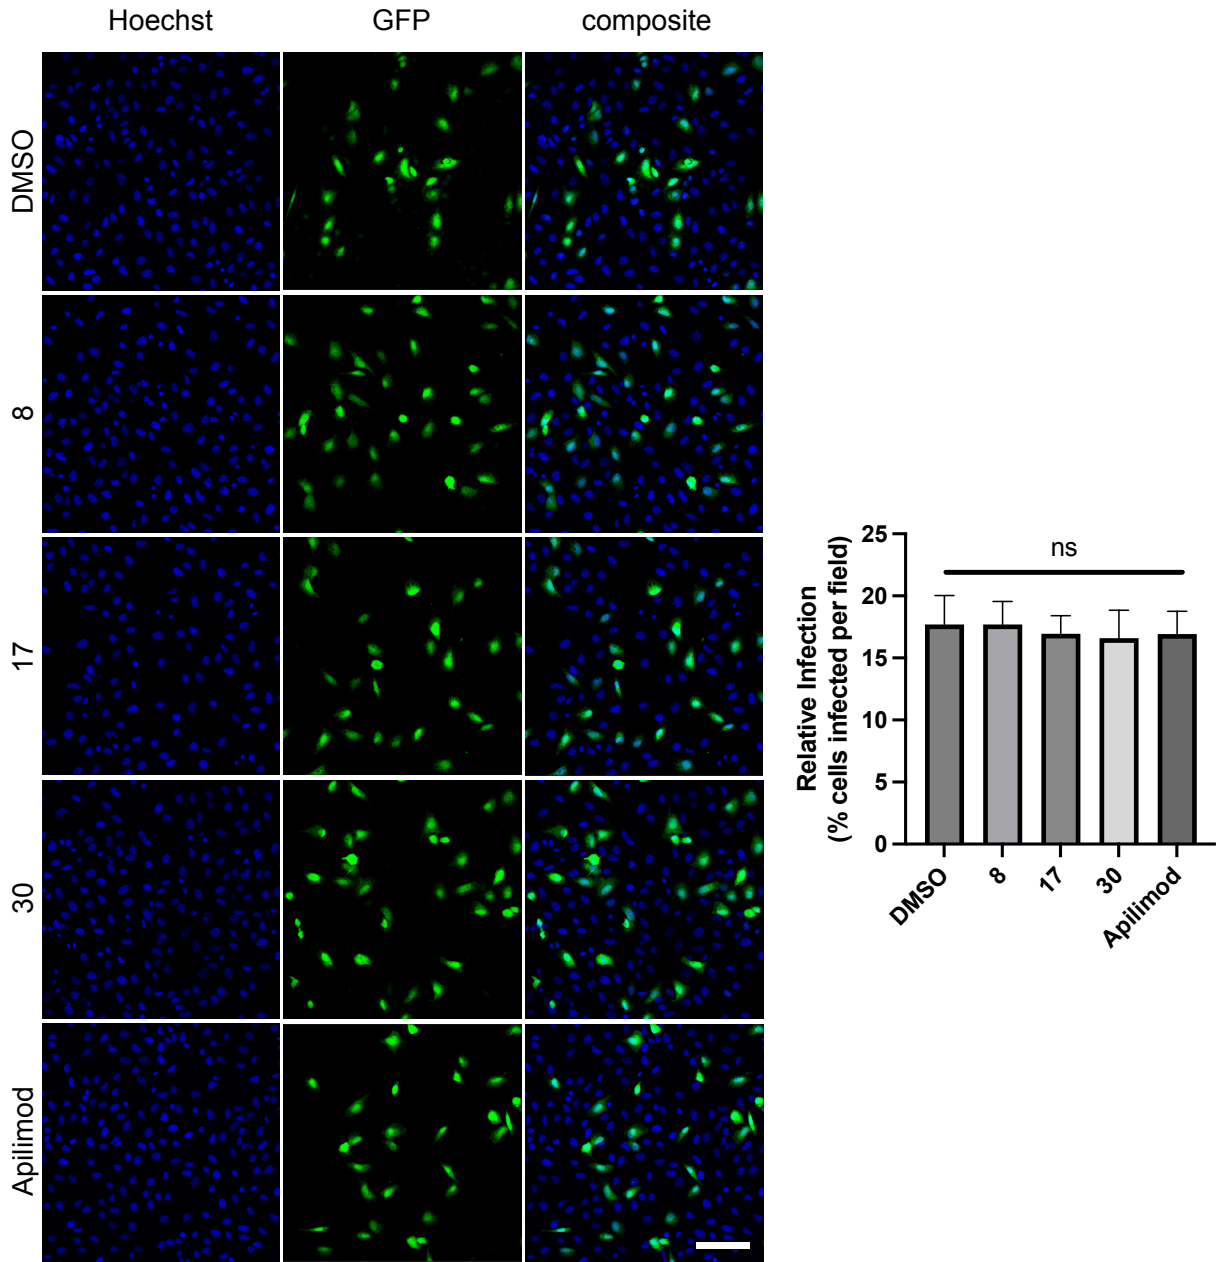

**Figure S6.** Uptake of bald GFP lentivirus is not inhibited by PIKfyve inhibitors. Calu-3 cells were incubated with 1  $\mu$ M of each compound (or DMSO) for 1 h followed by the addition of the bald GFP lentivirus for 12 h. Cells were fixed and stained with Hoechst to label nuclei. Cells were also imaged for GFP, following transduction from the pseudovirus. Scale bar (shown in white in the bottom right corner of images) = 100  $\mu$ m. Bar graph shows the quantification of bald GFP lentivirus infection from experiments: n = 9 from three independent experiments, mean  $\pm$  SD; one-way *ANOVA* followed Tukey's test; ns = not significant when  $p > 0.05$ .



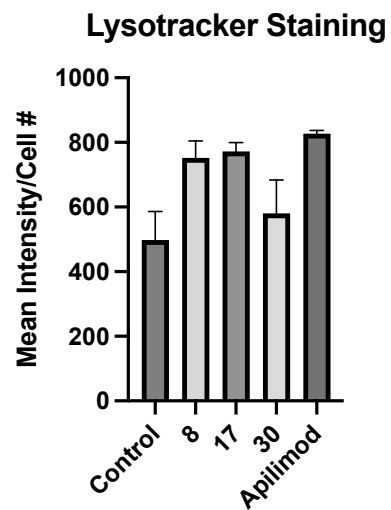

Figure S7. Quantification of fluorescence from Lysotracker staining in Figure 7.

## Compound Characterization – Experimental Spectra

2-bromo-5,6,7,8,9,10-hexahydrocyclohepta[b]indol (34).

$^1\text{H}$  NMR

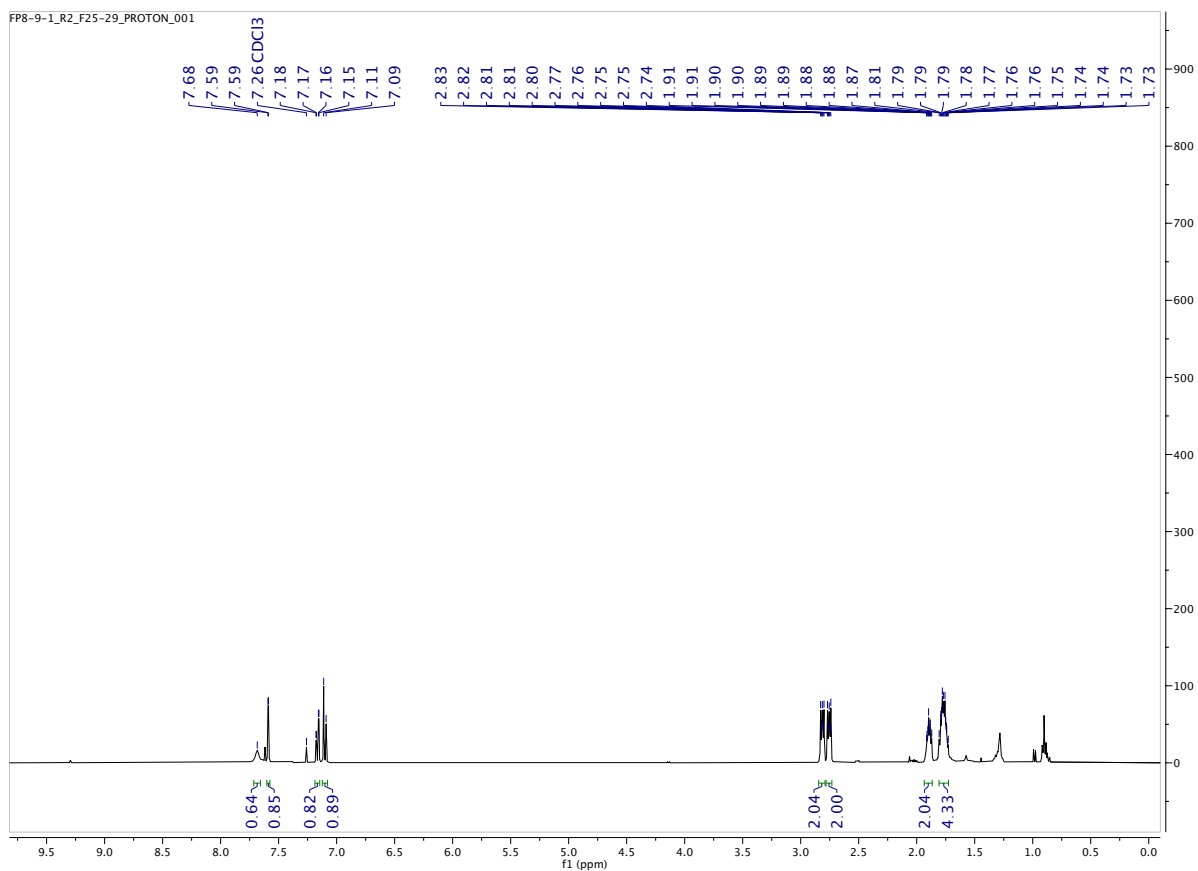

# <sup>13</sup>C NMR

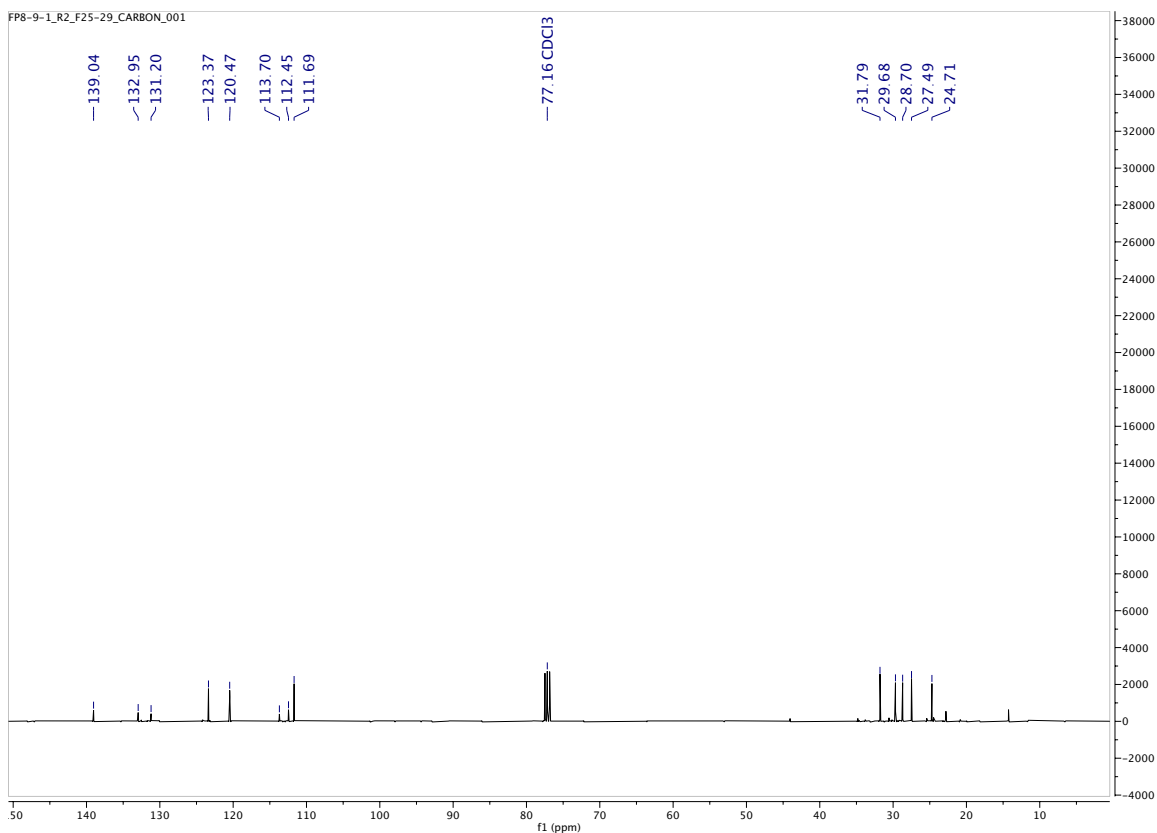

# LC Chromatogram HRMS

RT: 0.00 - 9.01

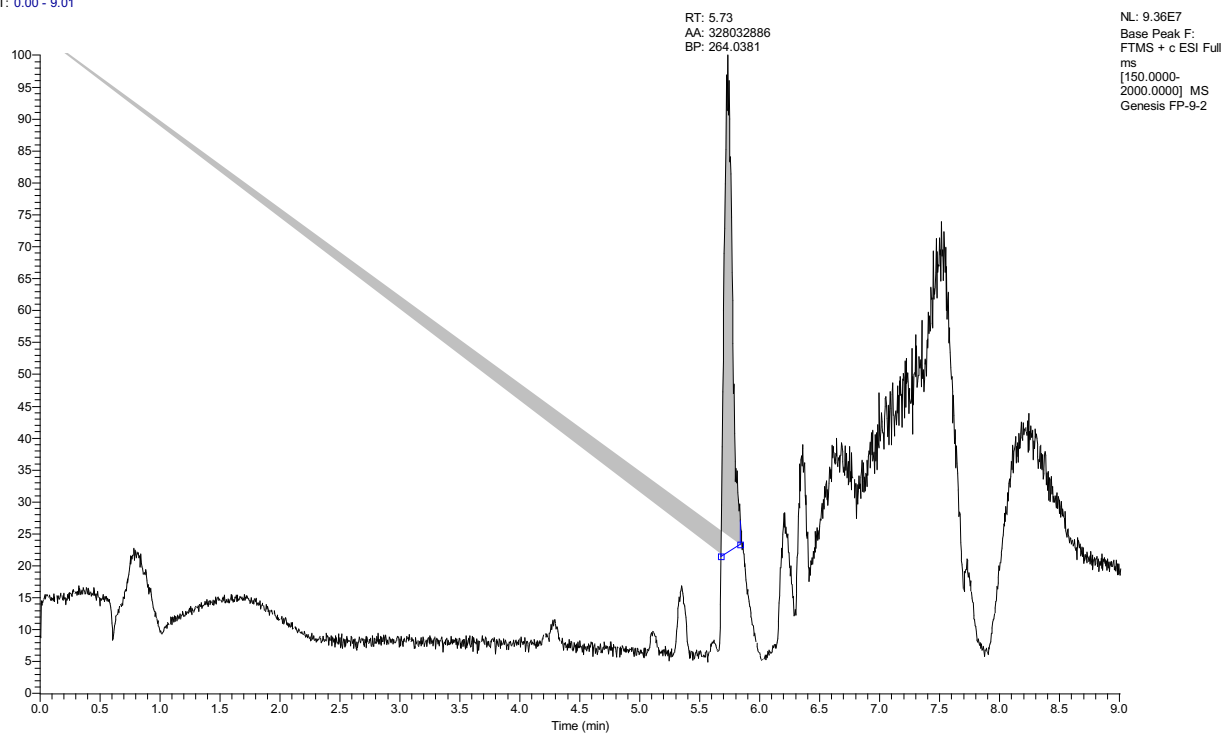

# LC Chromatogram LCMS

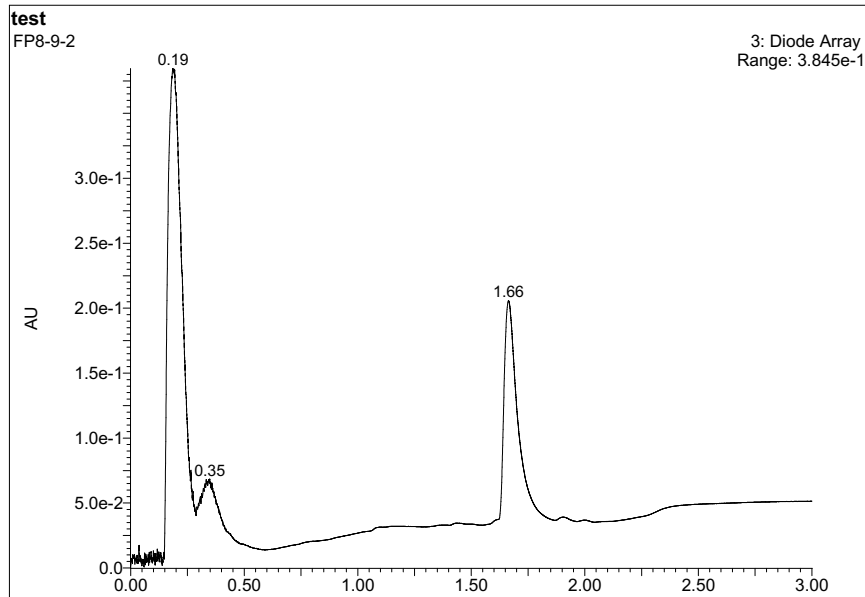

## HRMS

FP-9-2 #1316-1357 RT: 5.69-5.86 AV: 42 NL: 4.60E7  
T: FTMS + c ESI Full ms [150.0000-2000.0000]

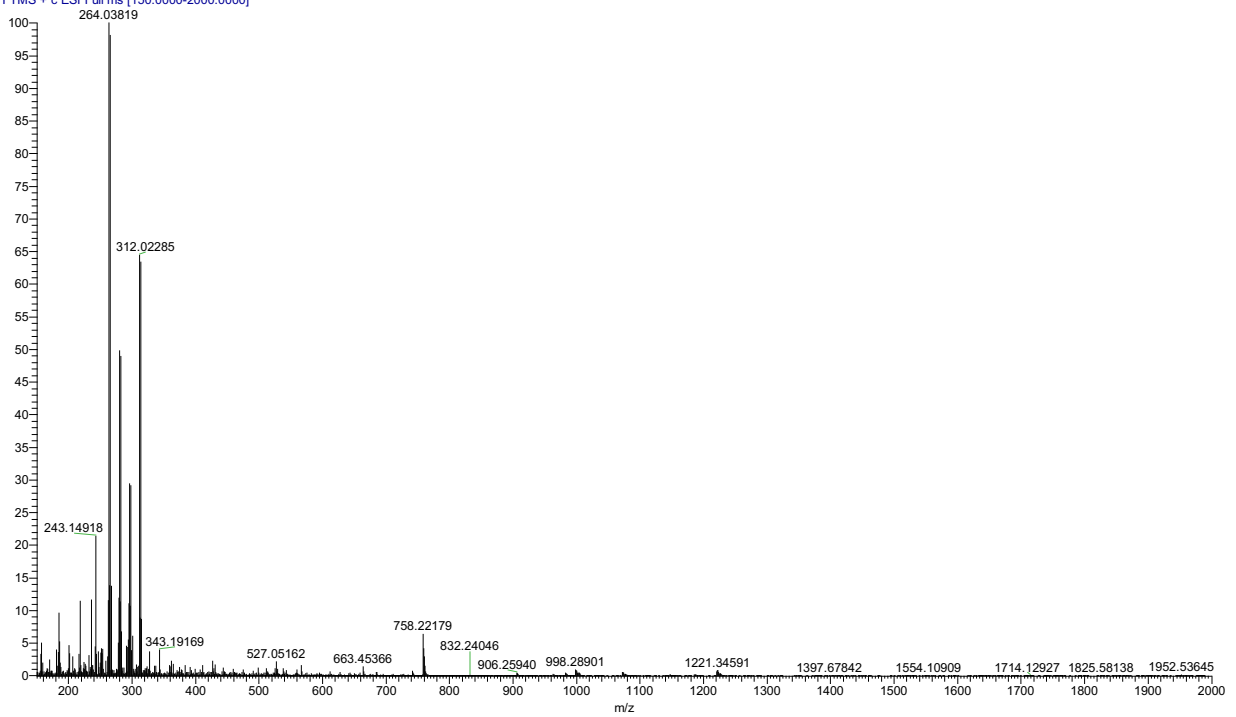

FP-9-2 #1316-1357 RT: 5.69-5.86 AV: 42 NL: 4.60E7  
T: FTMS + c ESI Full ms [150.0000-2000.0000]

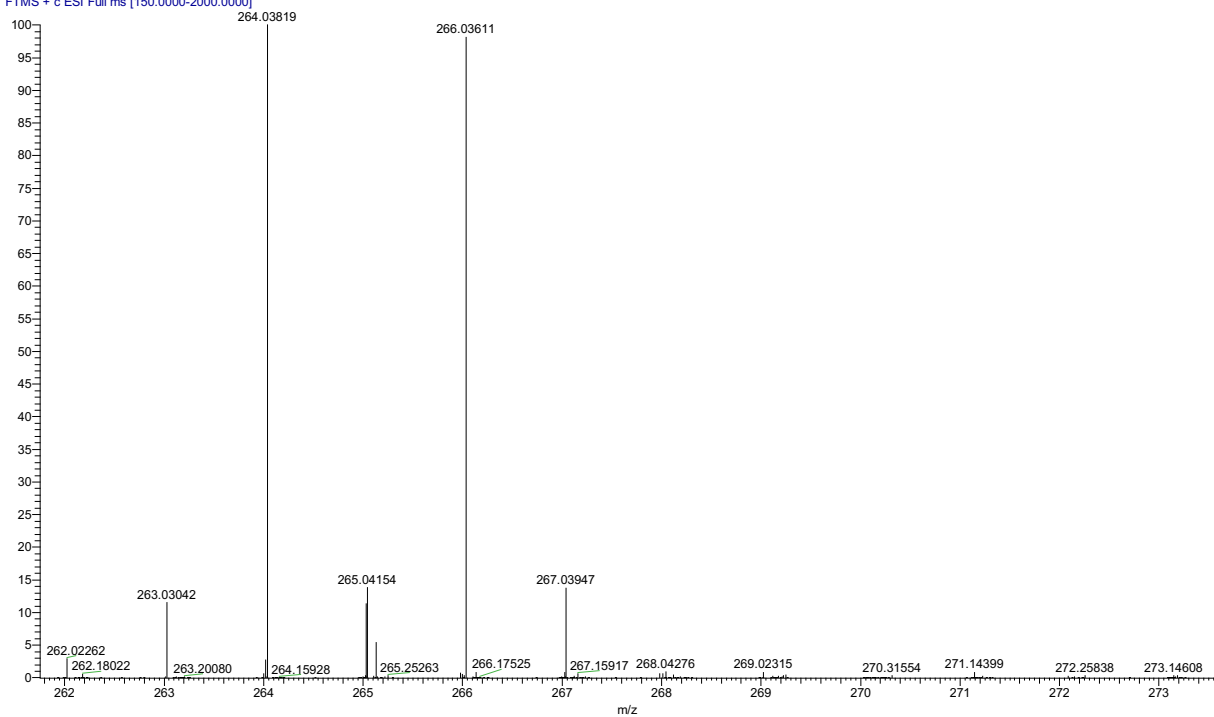

*6-bromo-1,2,3,9-tetrahydro-4H-carbazol-4-one (36).*

<sup>1</sup>H NMR

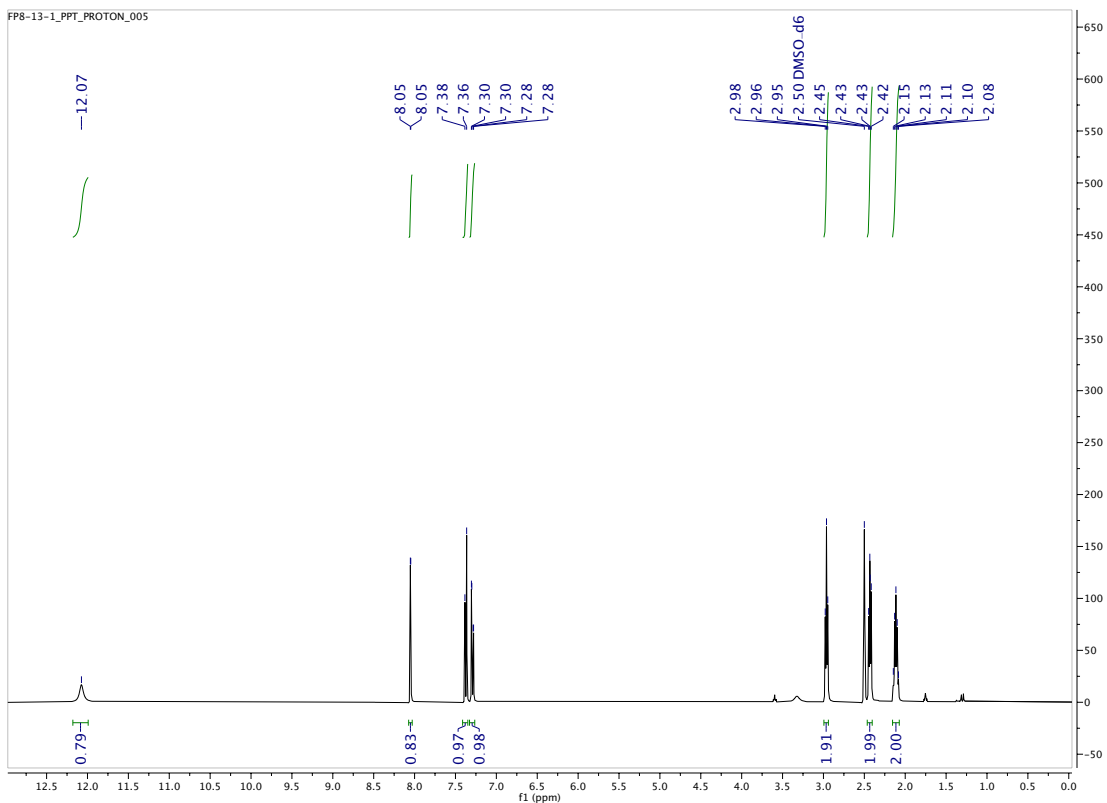

# <sup>13</sup>C NMR

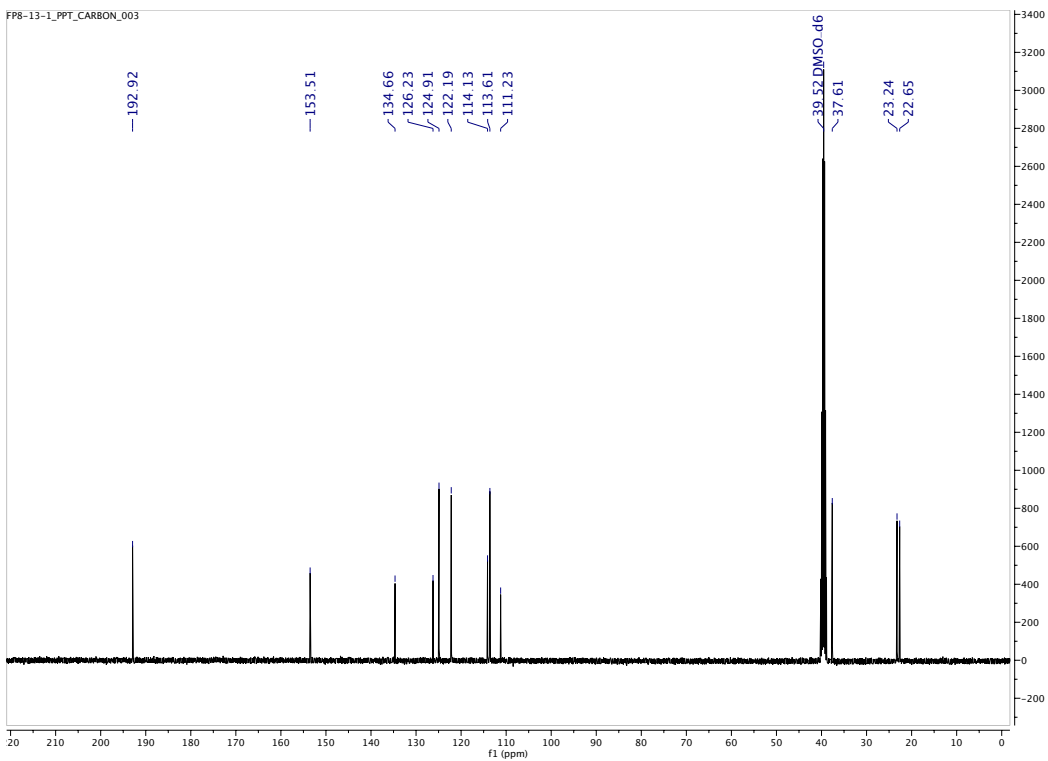

# LC Chromatogram HRMS

RT: 0.00 - 9.01

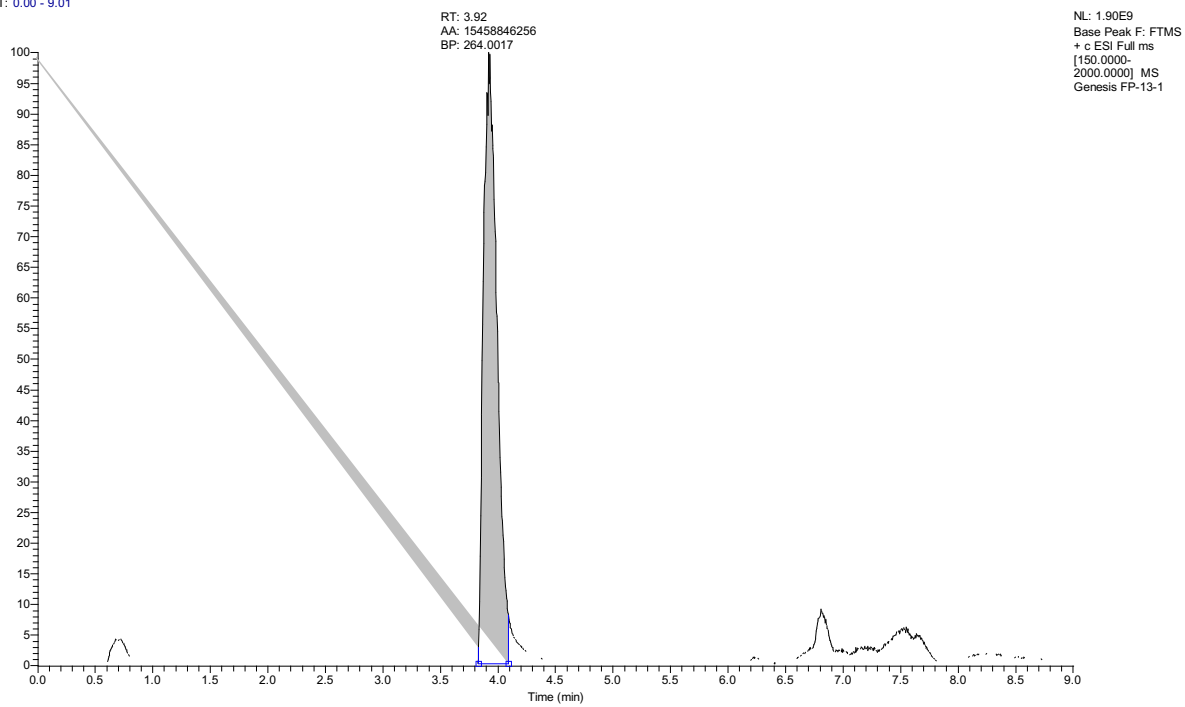

# LC Chromatogram LCMS

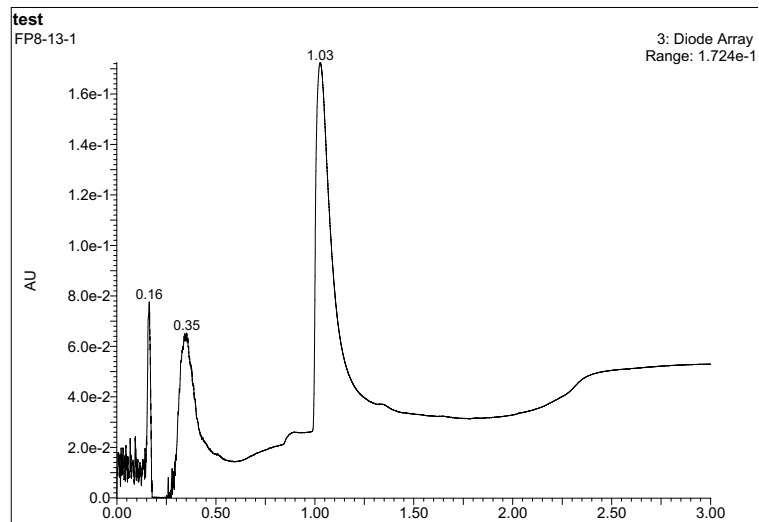

# HRMS

FP-13-1 #876-948 RT: 3.78-4.10 AV: 73 NL: 8.26E8  
T: FTMS + c ESI Full ms [150.0000-2000.0000]

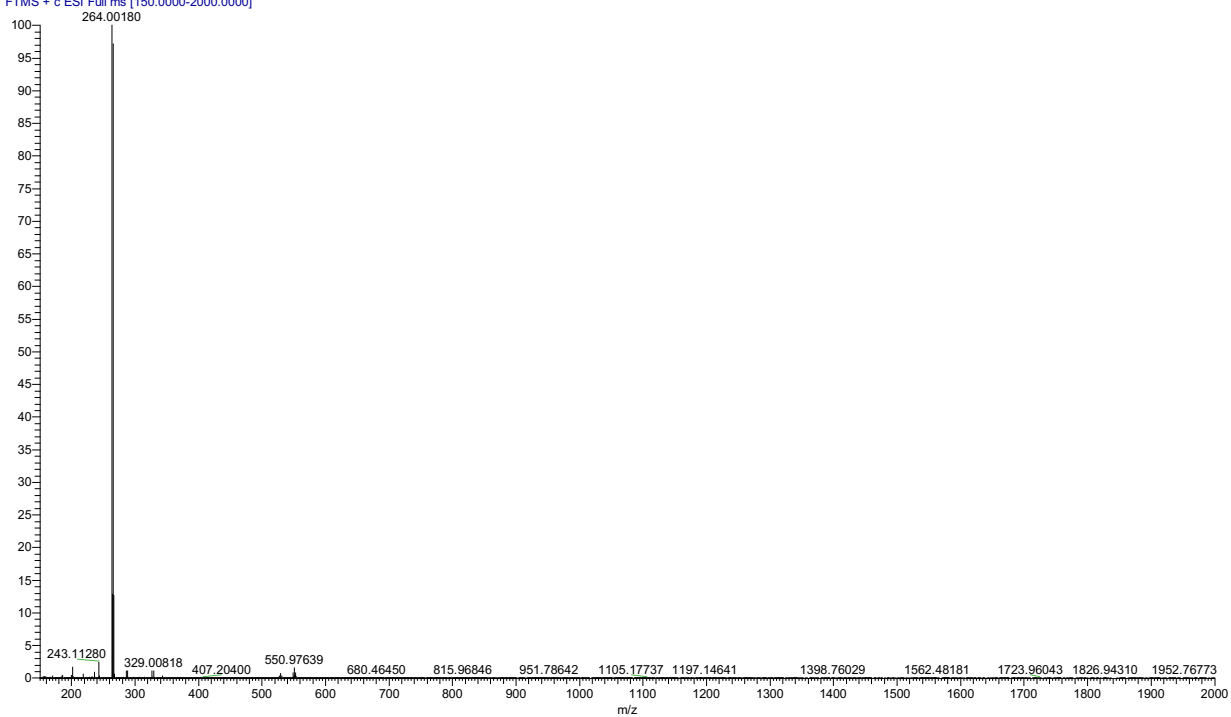

2-bromo-6,7,8,9-tetrahydrocyclohepta[b]indol-10(5H)-one (37).  
<sup>1</sup>H NMR

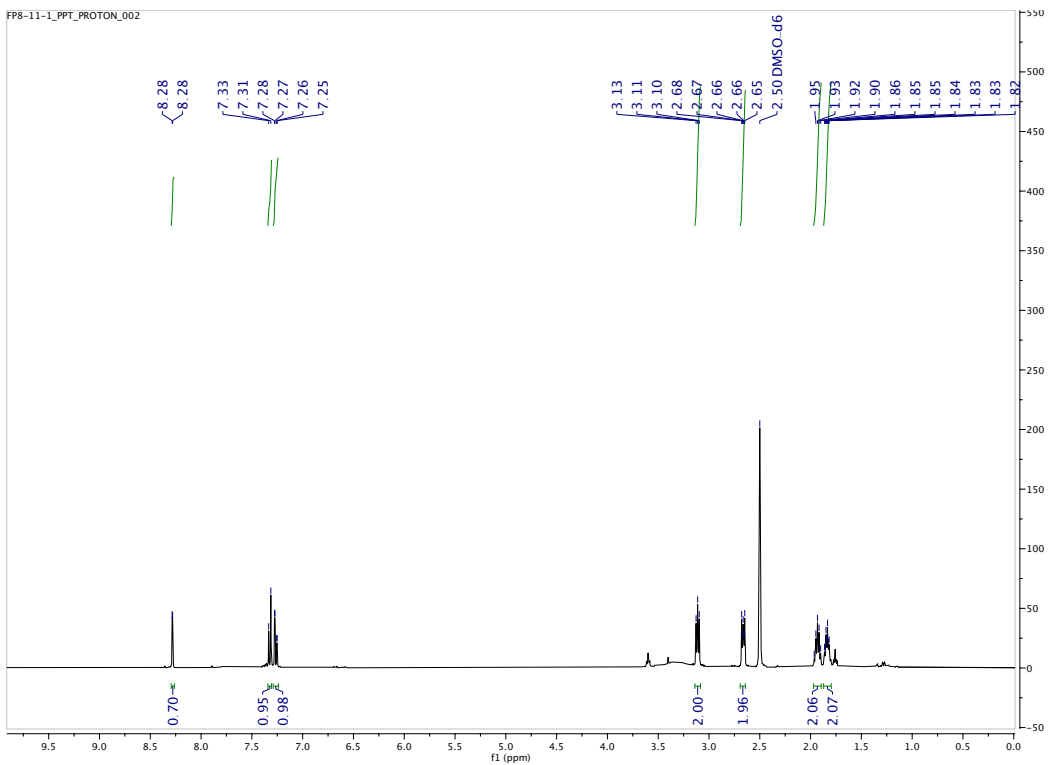

<sup>13</sup>C NMR

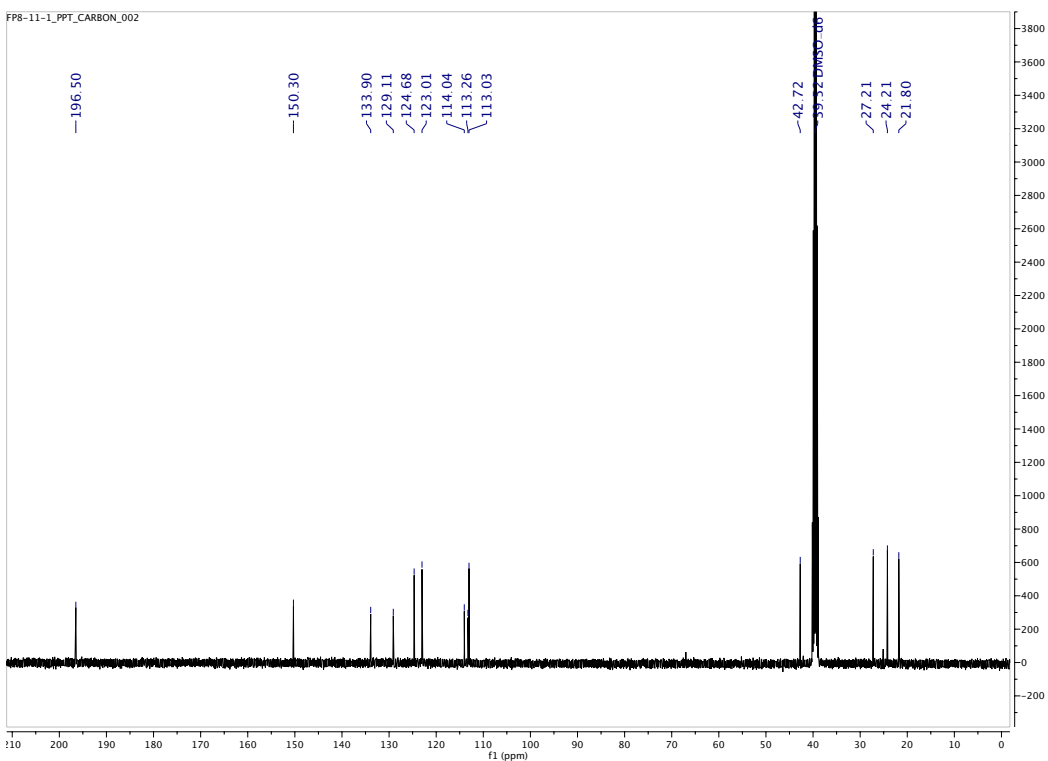



# LC Chromatogram HRMS

RT: 0.00 - 9.01

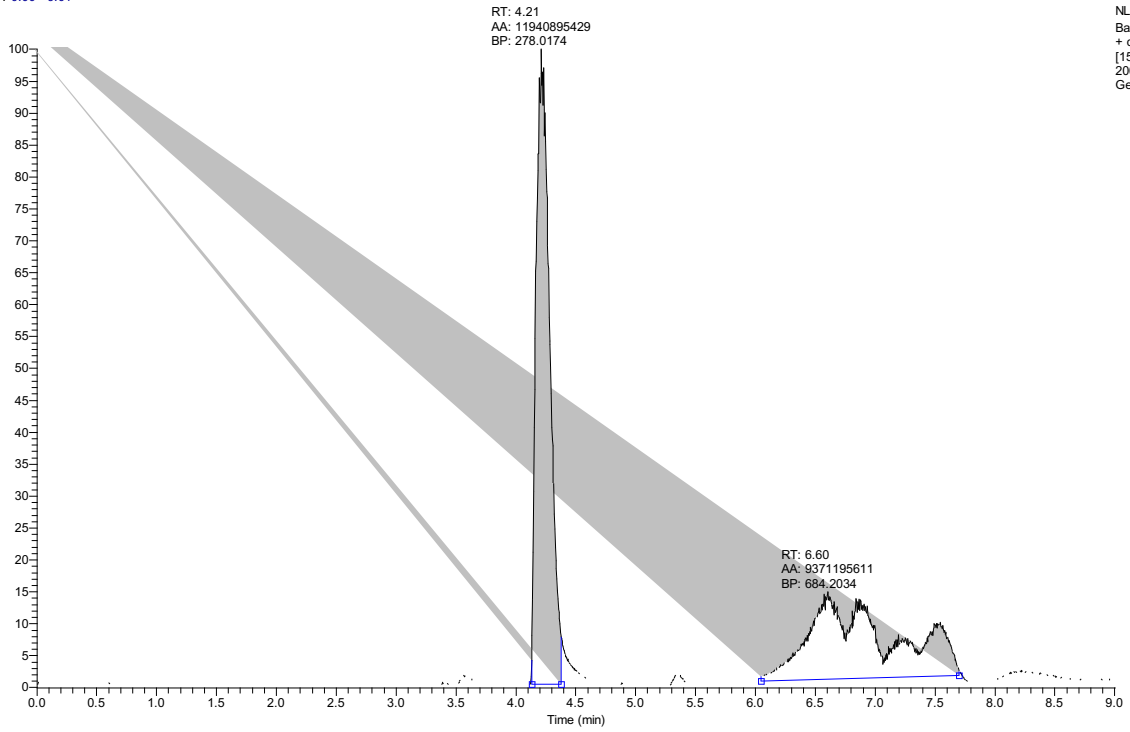

NL: 1.52E9  
Base Peak F: FTMS  
+ c ESI Full ms  
[150.0000-  
2000.0000] MS  
Genesis FP-11-2

# LC Chromatogram LCMS

test

FP8-11-2

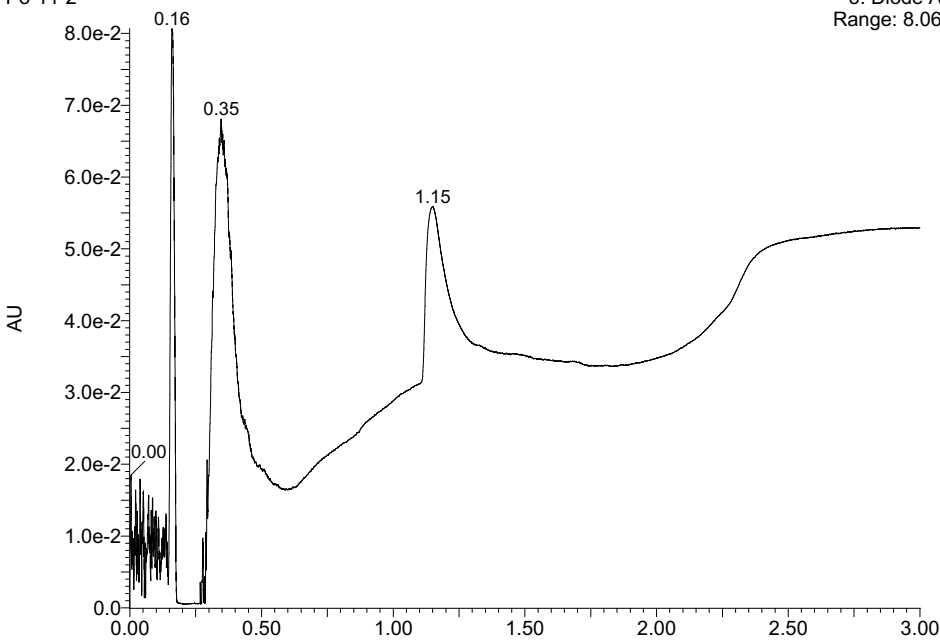

3: Diode Array  
Range: 8.069e-2

# HRMS

FP-11-2 #958-1013 RT: 4.14-4.38 AV: 56 NL: 8.29E8  
T: FTMS + c ESI Full ms [150.0000-2000.0000]

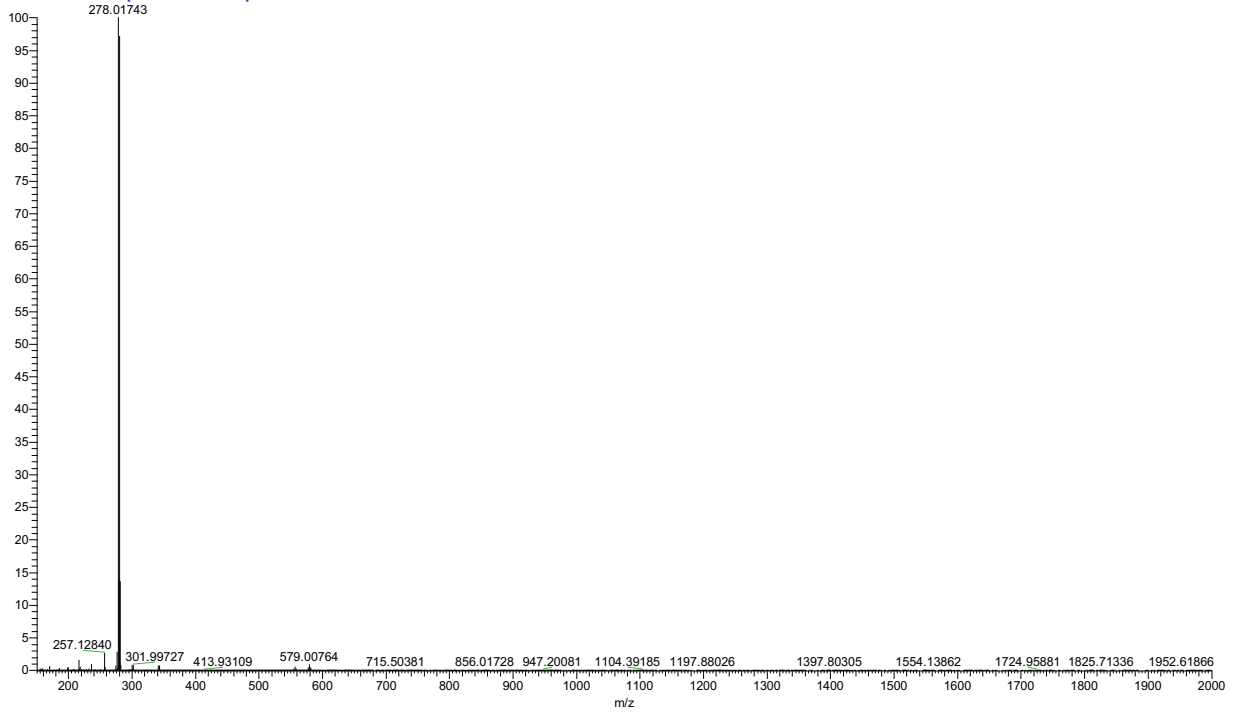

FP-11-2 #958-1013 RT: 4.14-4.38 AV: 56 NL: 8.29E8  
T: FTMS + c ESI Full ms [150.0000-2000.0000]

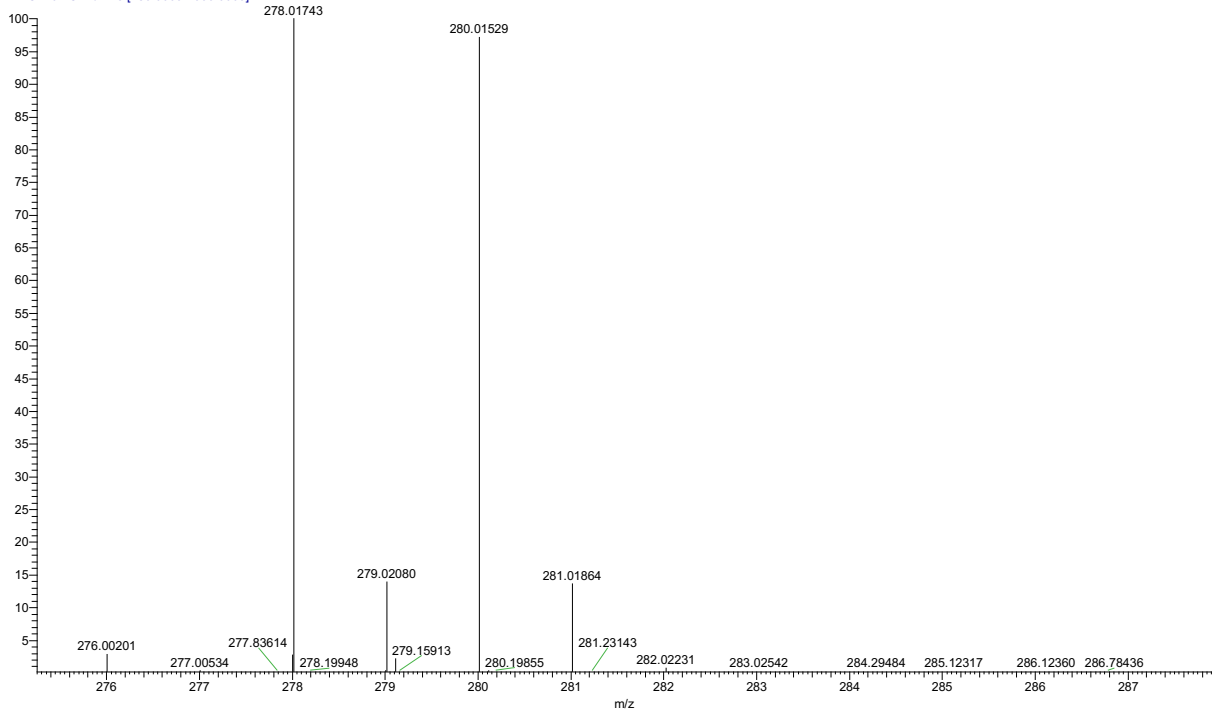

2-bromo-5,6,7,8,9,10-hexahydro-11H-cycloocta[b]indol-11-one (38).

<sup>1</sup>H NMR

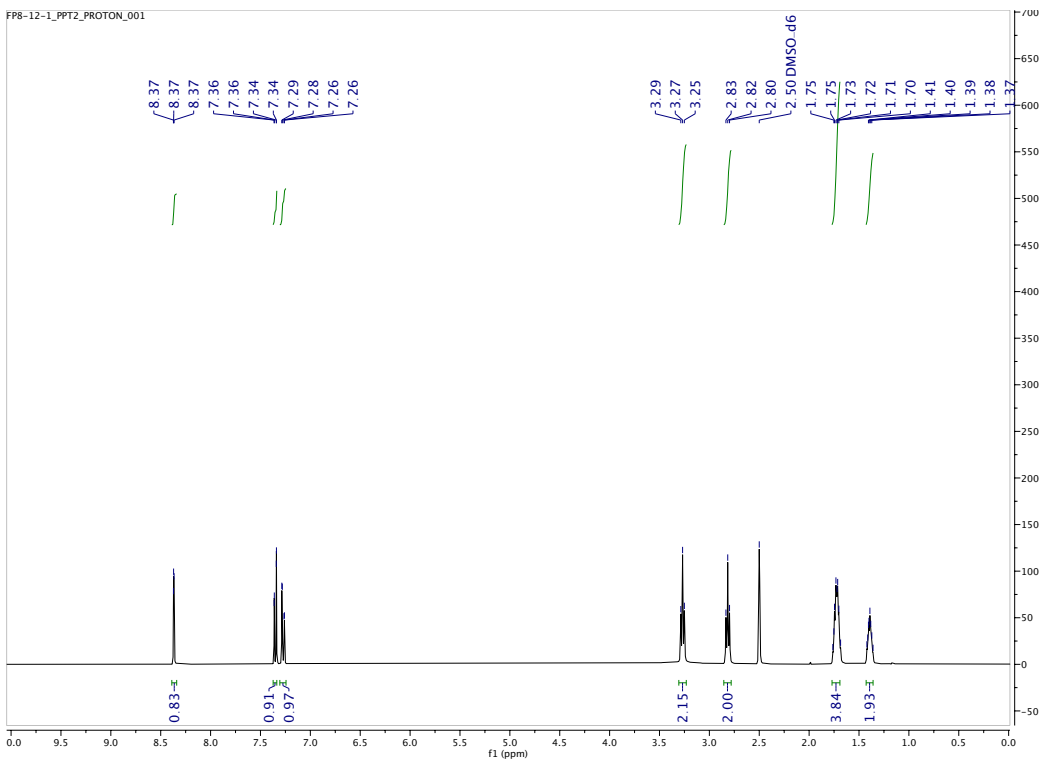

<sup>13</sup>C NMR

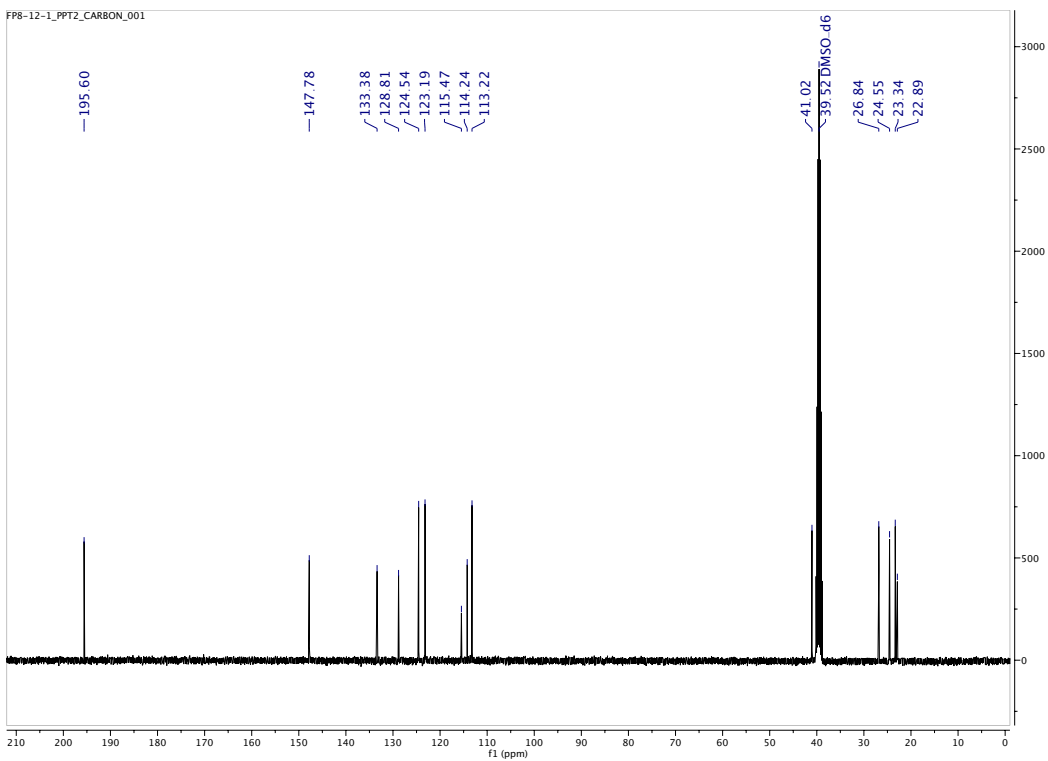

# LC Chromatogram HRMS

RT: 0.00 - 9.01

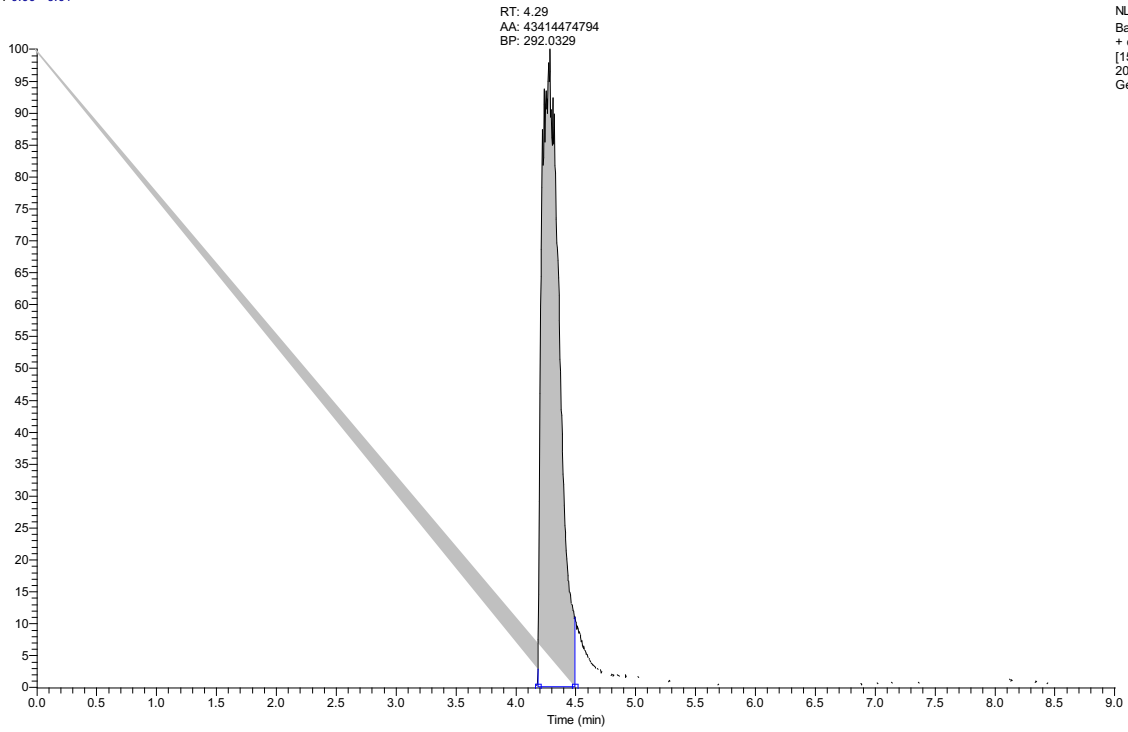

# LC Chromatogram LCMS

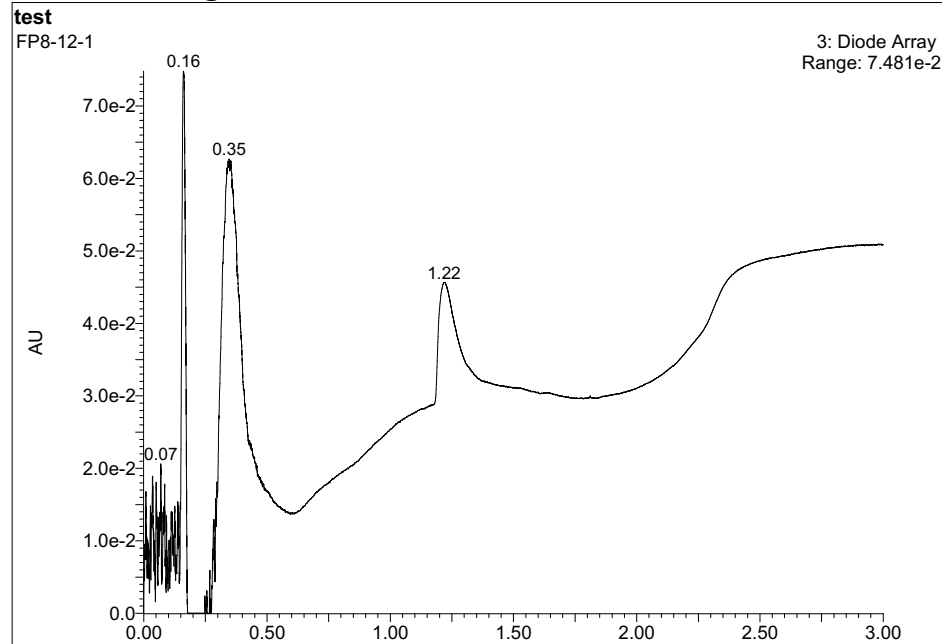

# HRMS

FP-12-1 #969-1036 RT: 4.19-4.48 AV: 68 NL: 2.44E9  
T: FTMS + c ESI Full ms [150.0000-2000.0000]

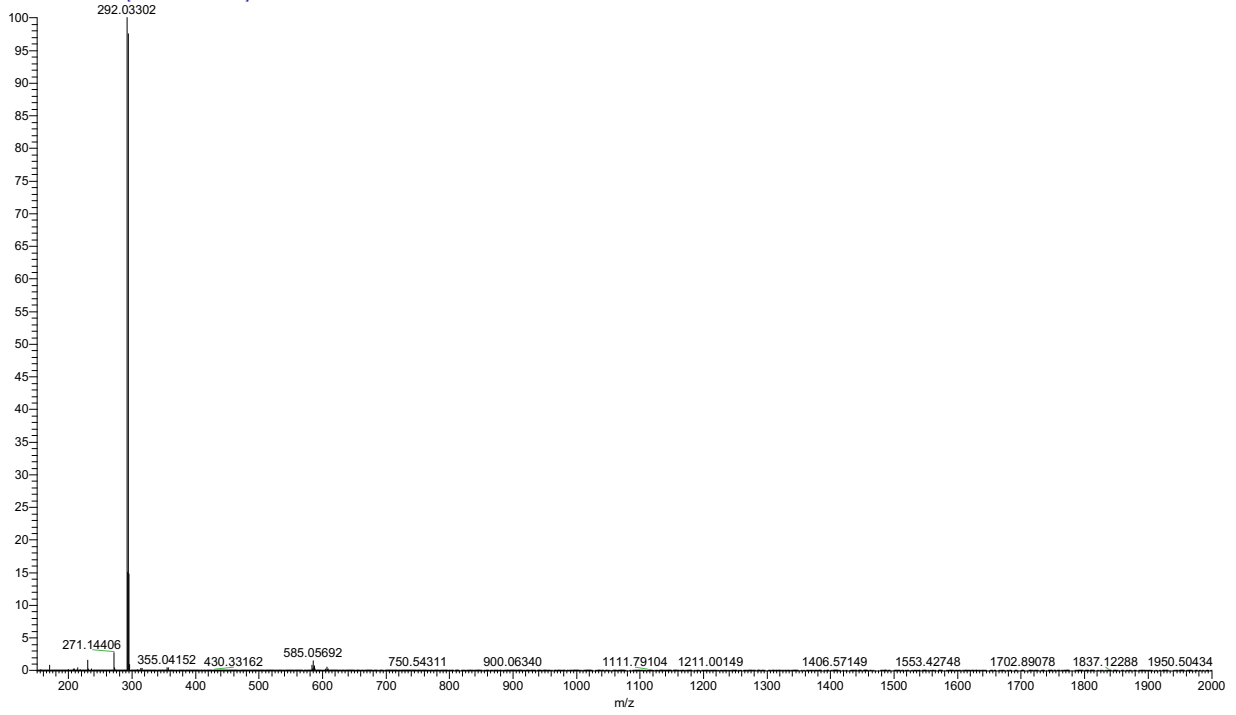

FP-12-1 #969-1036 RT: 4.19-4.48 AV: 68 NL: 2.44E9  
T: FTMS + c ESI Full ms [150.0000-2000.0000]

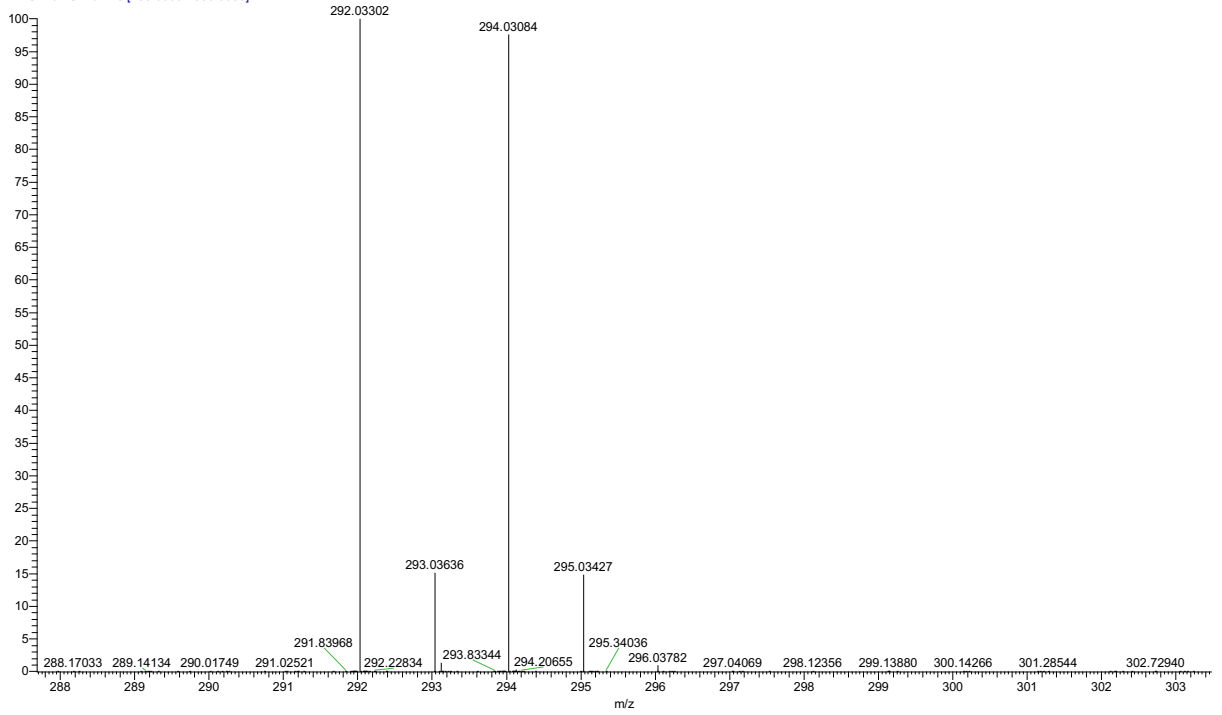

10-bromo-6,7-dihydro-5H-pyrimido[5,4-c]carbazol-2-amine (42).

<sup>1</sup>H NMR

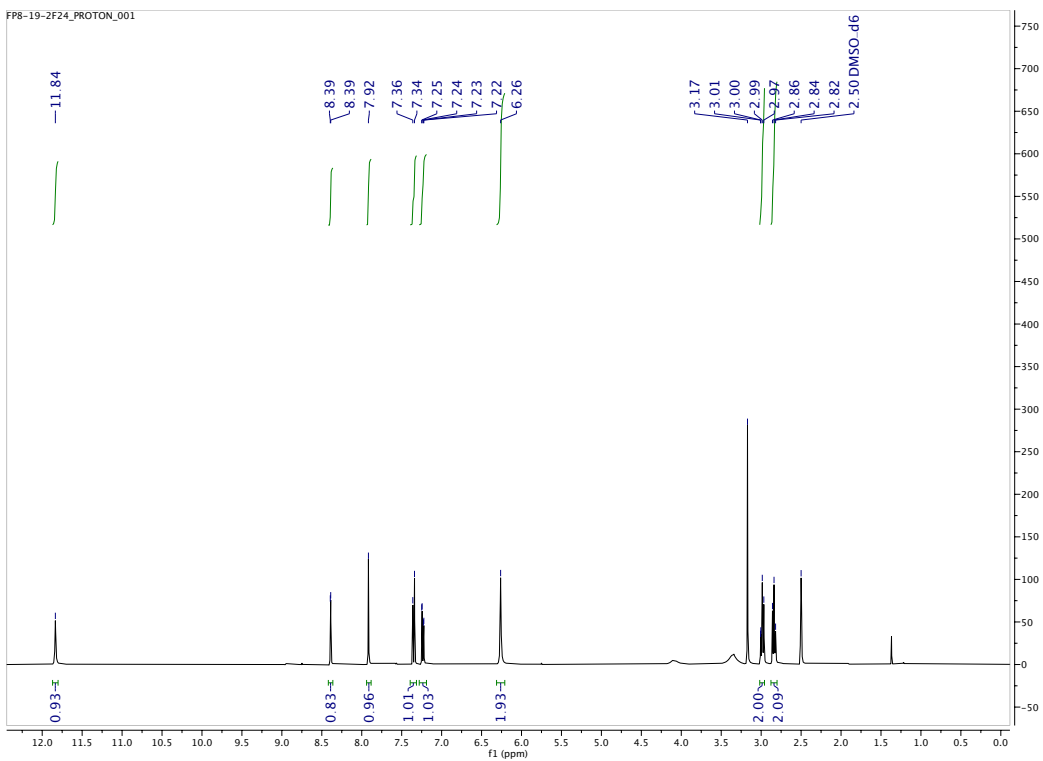

<sup>13</sup>C NMR

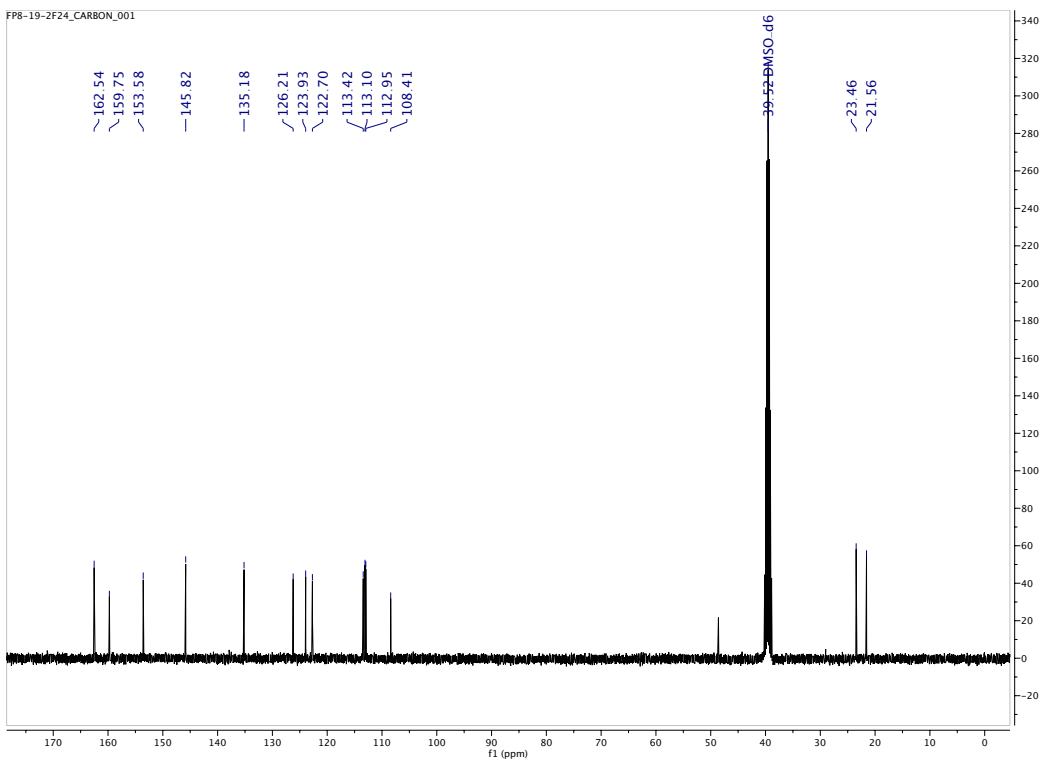

# LC Chromatogram HRMS

RT: 0.00 - 9.01

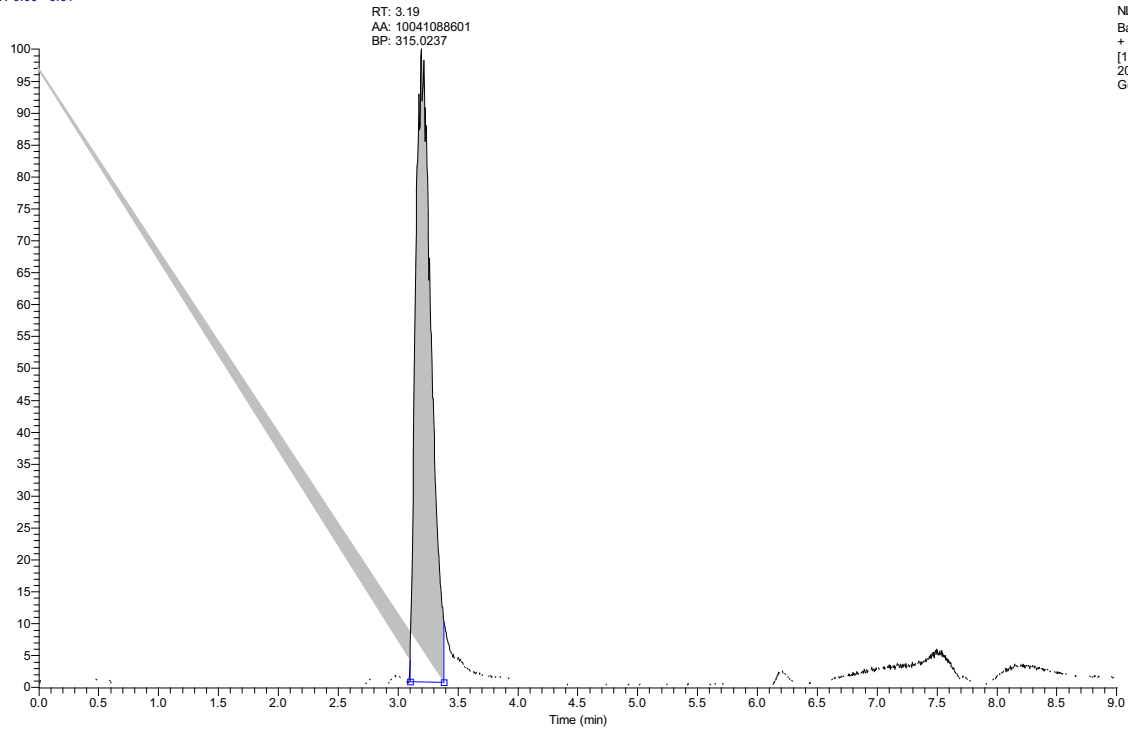

# HRMS

FP-19-2 #723-783 RT: 3.12-3.38 AV: 61 NL: 6.33E8  
T: FTMS + c ESI Full ms [150.0000-2000.0000]

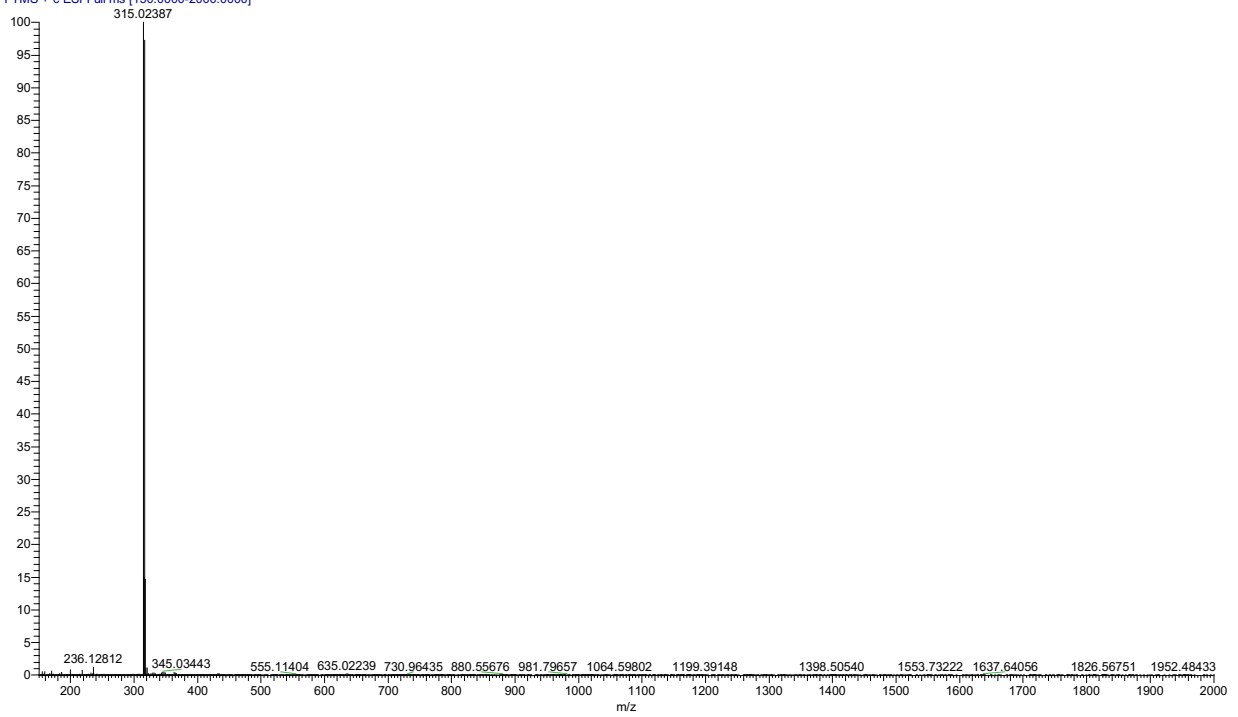

FP-19-2 #723-783 RT: 3.12-3.38 AV: 61 NL: 6.33E8  
T: FTMS + c ESI Full ms [150.0000-2000.0000]

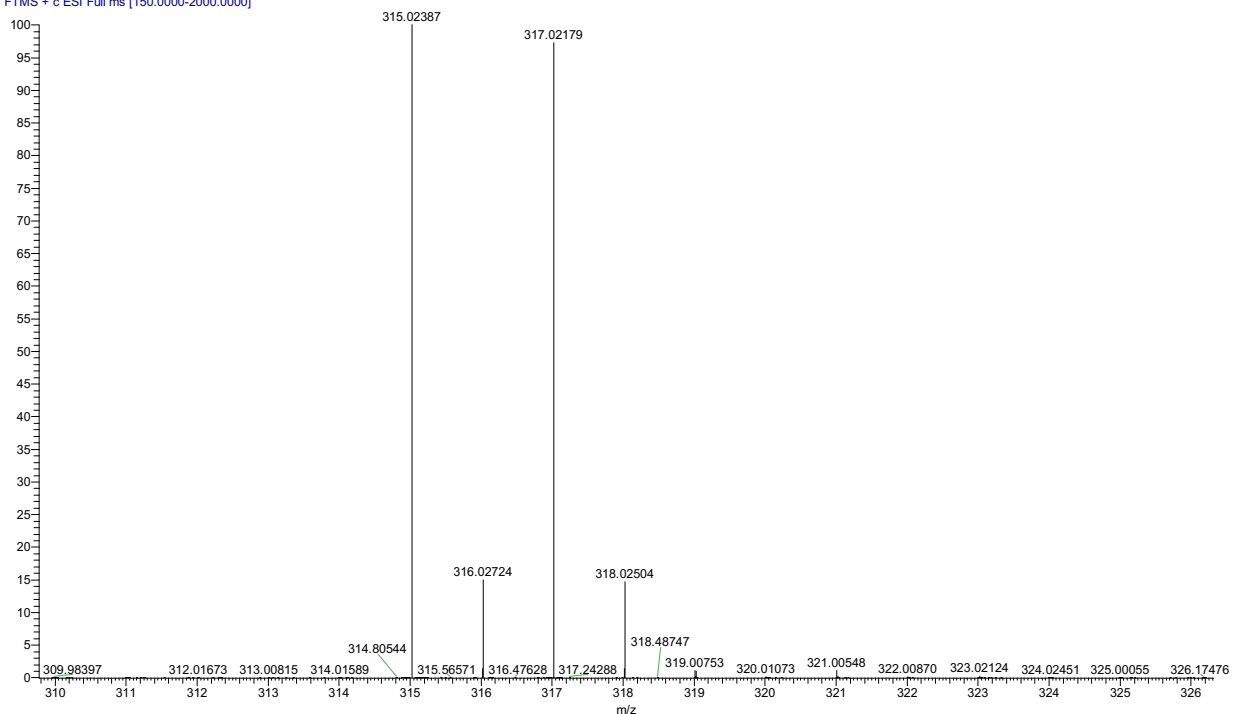

*11-bromo-5,6,7,8-tetrahydropyrimido[4',5':3,4]cyclohepta[1,2-b]indol-2-amine (43).*

<sup>1</sup>H NMR

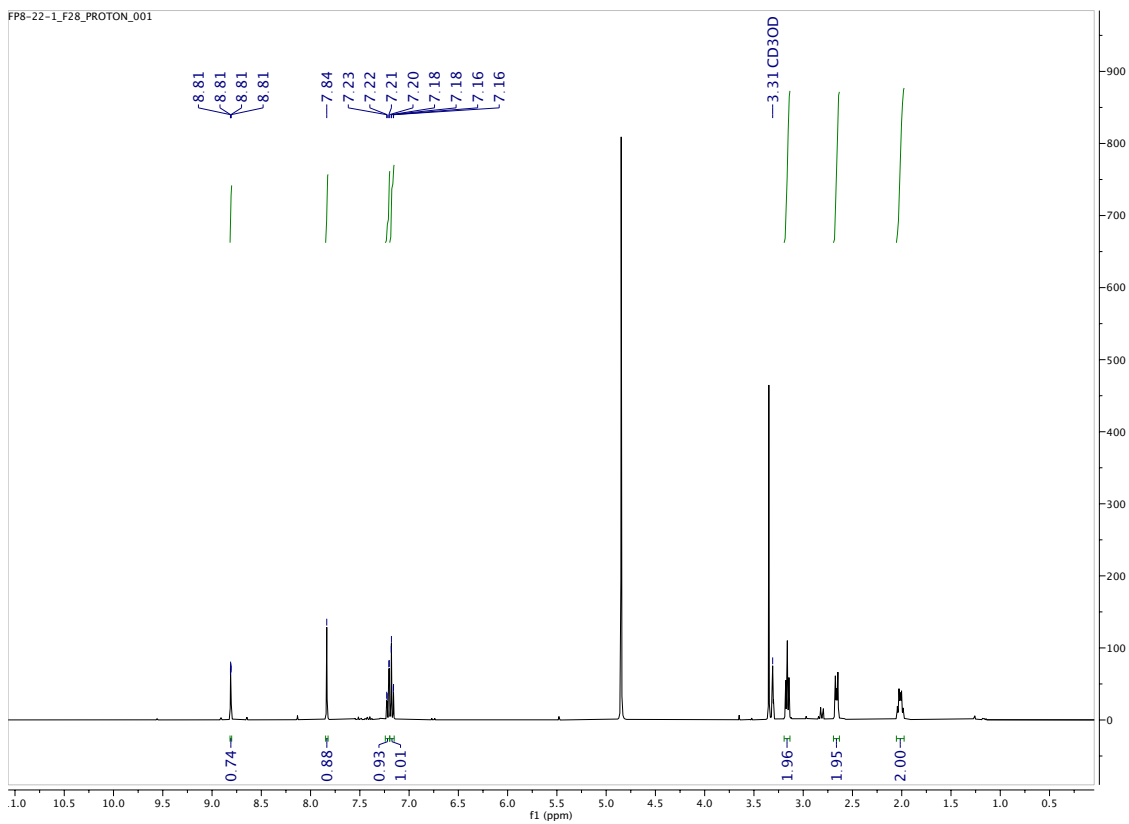



# <sup>13</sup>C NMR

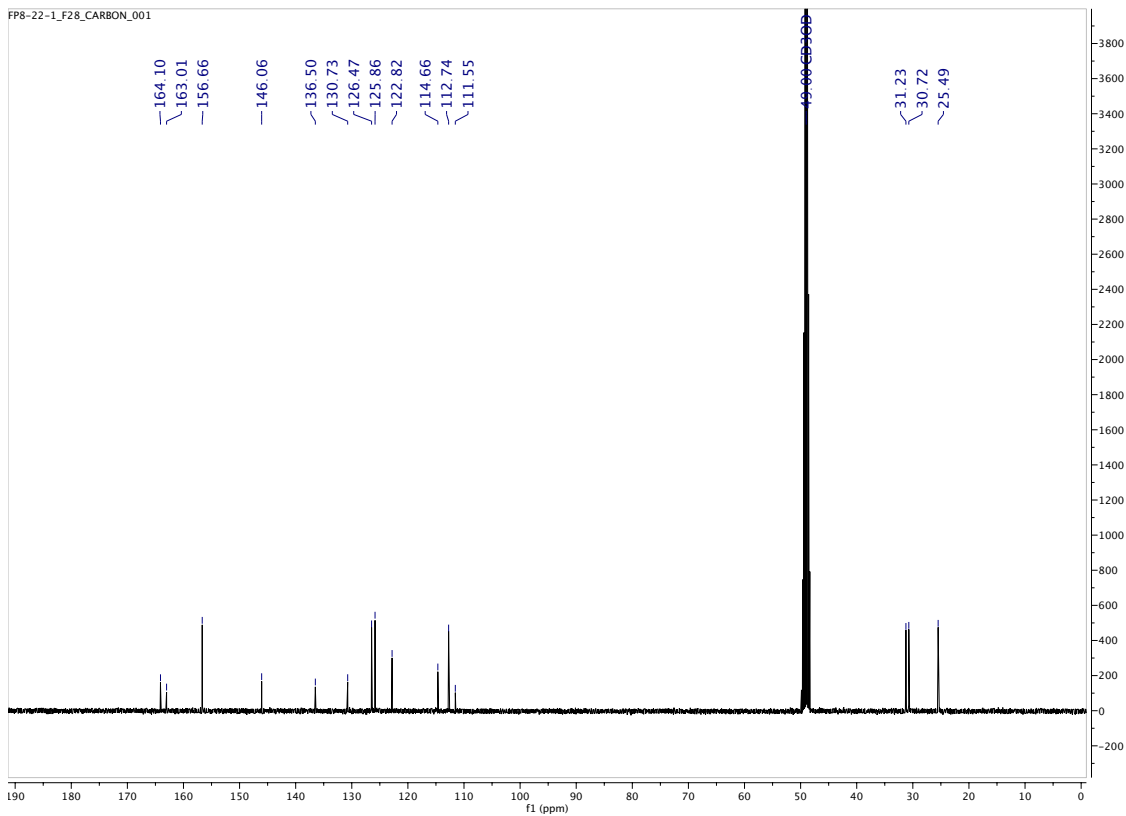

# LC Chromatogram HRMS

RT: 0.00 - 9.01

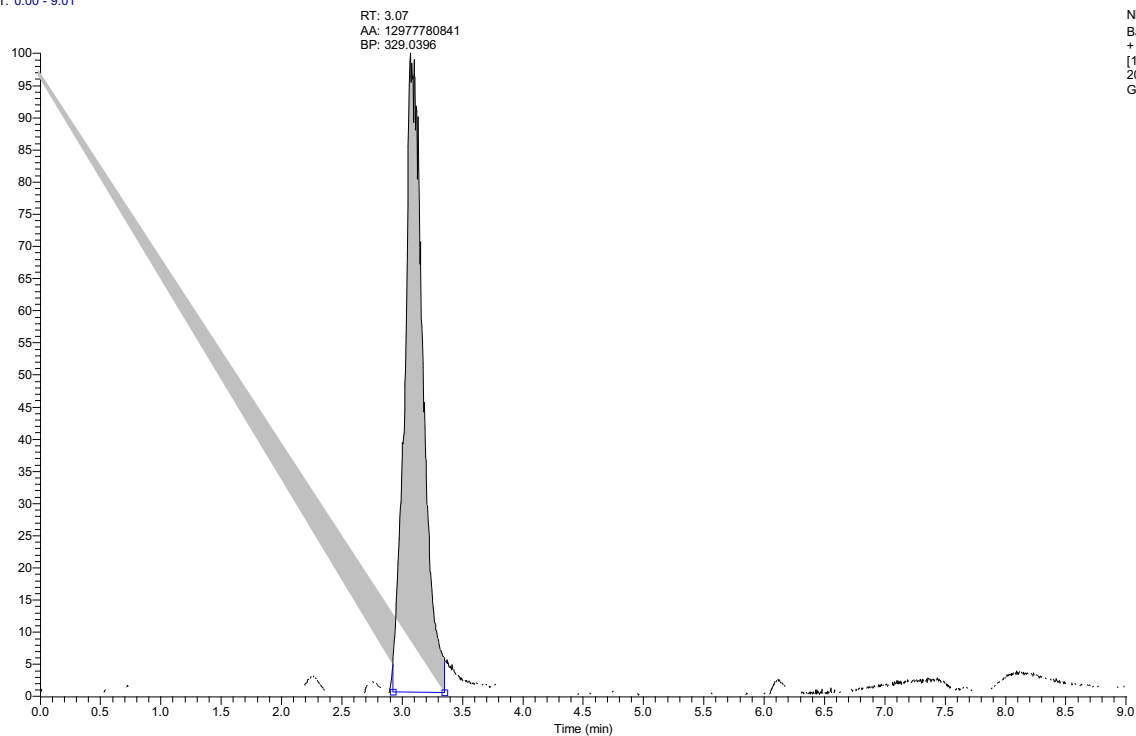

# LC Chromatogram LCMS

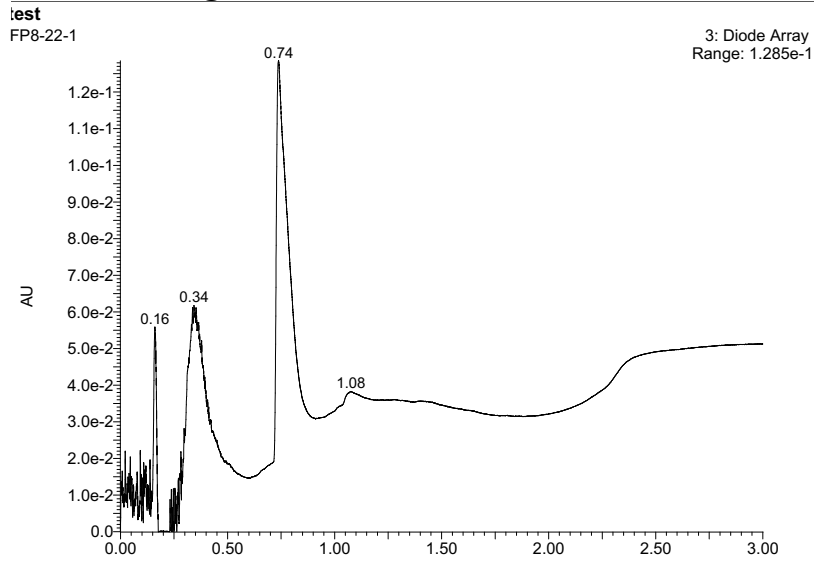

## HRMS

FP-22-1 #683-758 RT: 2.95-3.28 AV: 76 NL: 6.39E8  
T: FTMS + c ESI Full ms [150.0000-2000.0000]

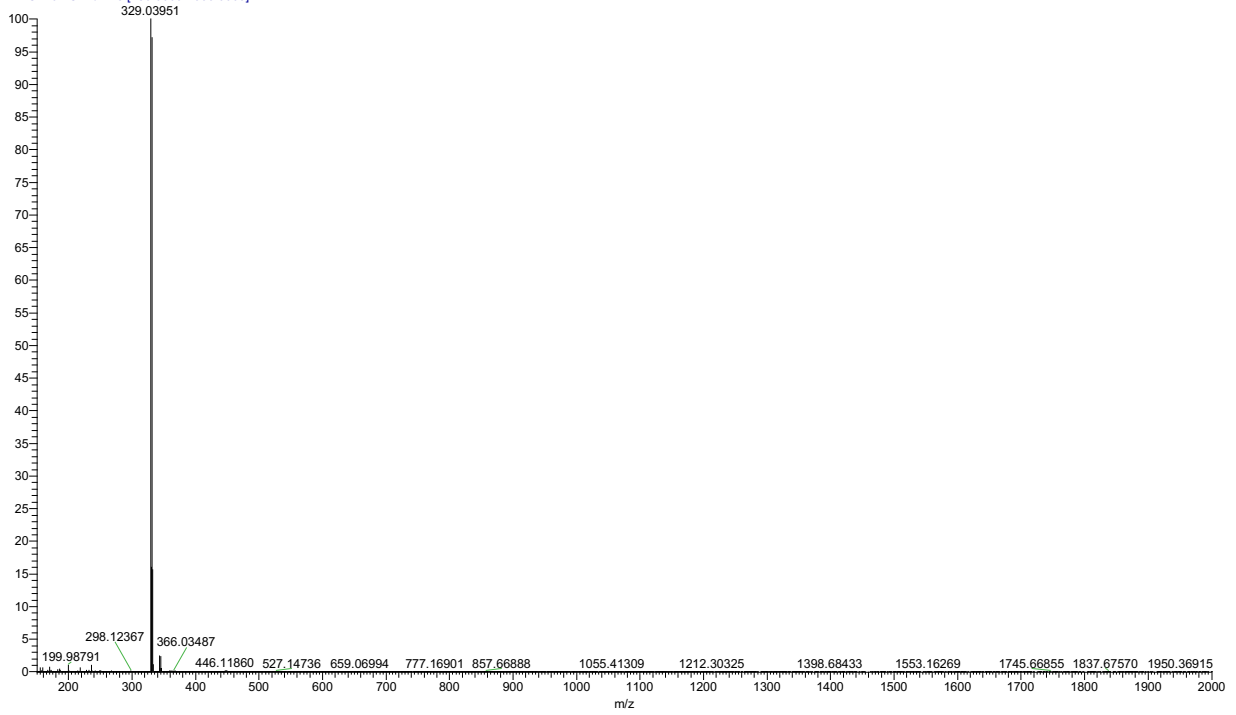

FP-22-1 #683-758 RT: 2.95-3.28 AV: 76 NL: 6.39E8  
T: FTMS + c ESI Full ms [150.0000-2000.0000]

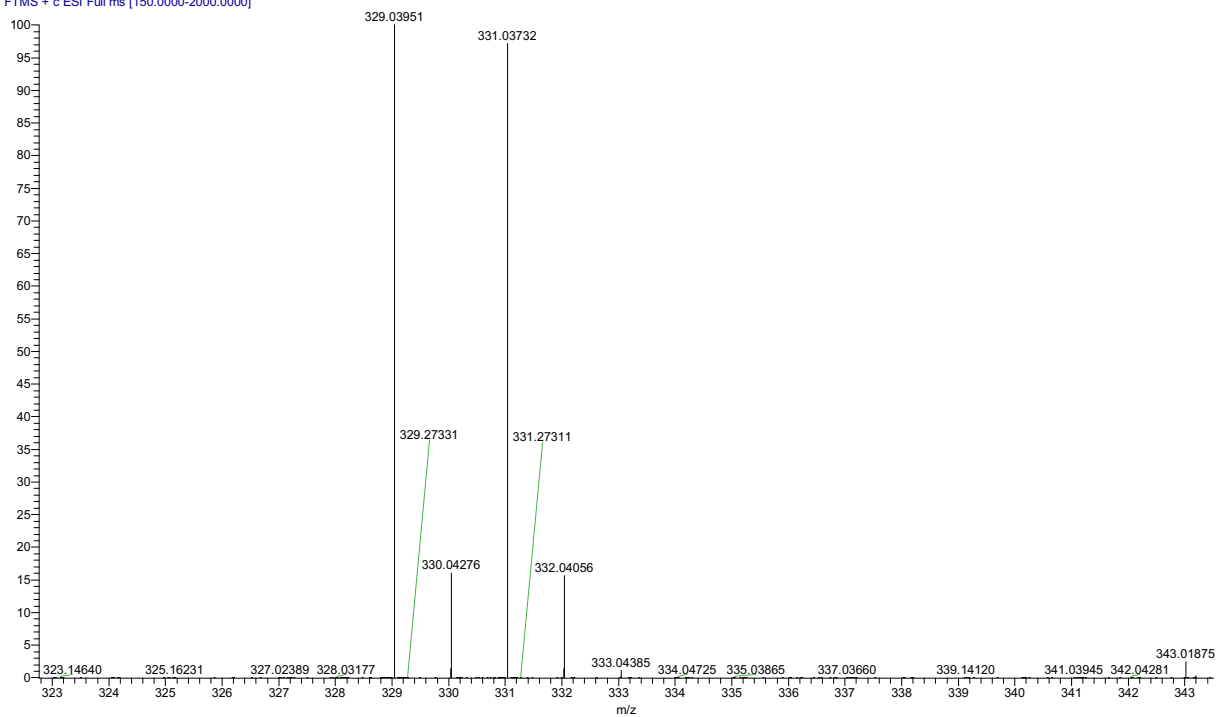

*12-bromo-6,7,8,9-tetrahydro-5H-pyrimido[4',5':3,4]cycloocta[1,2-b]indol-2-amine (44).*  
**<sup>1</sup>H NMR**

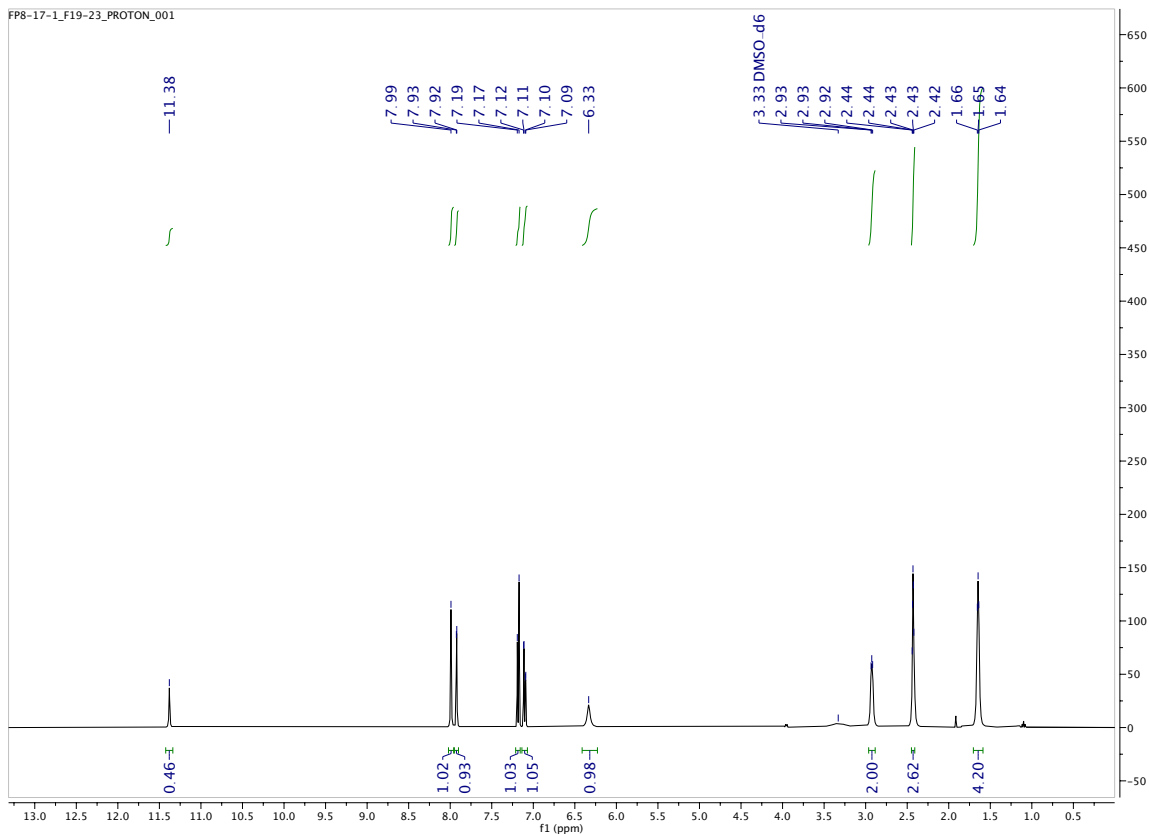

# <sup>13</sup>C NMR

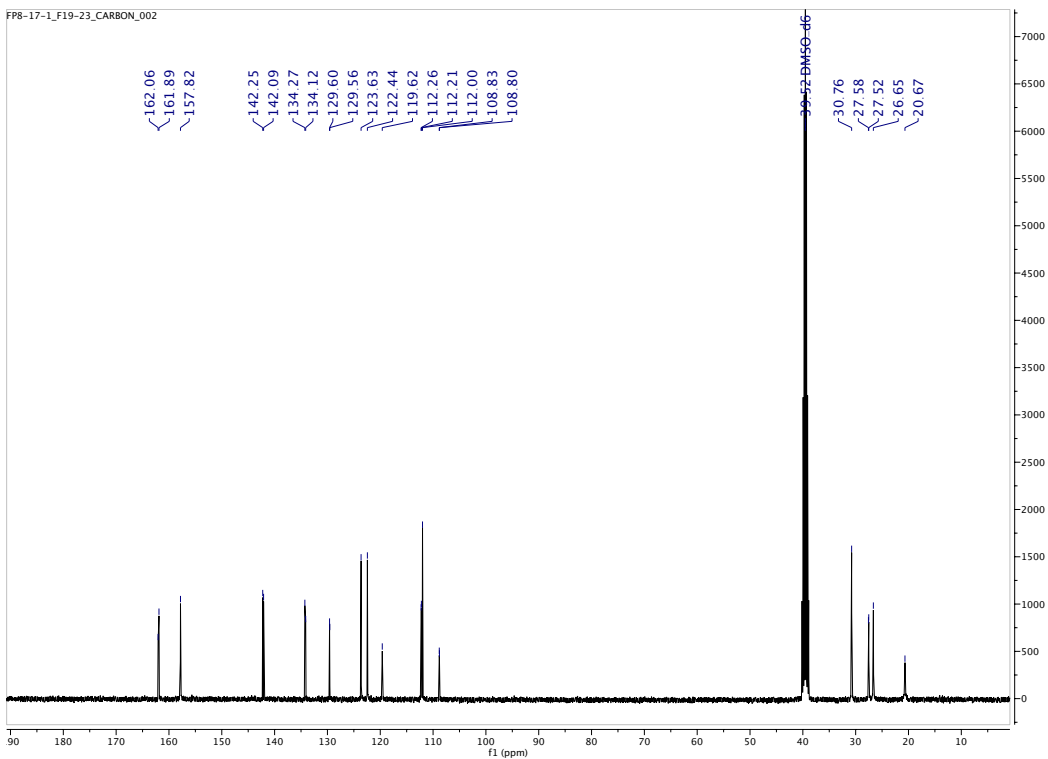

# LC Chromatogram HRMS

RT: 0.00 - 9.01

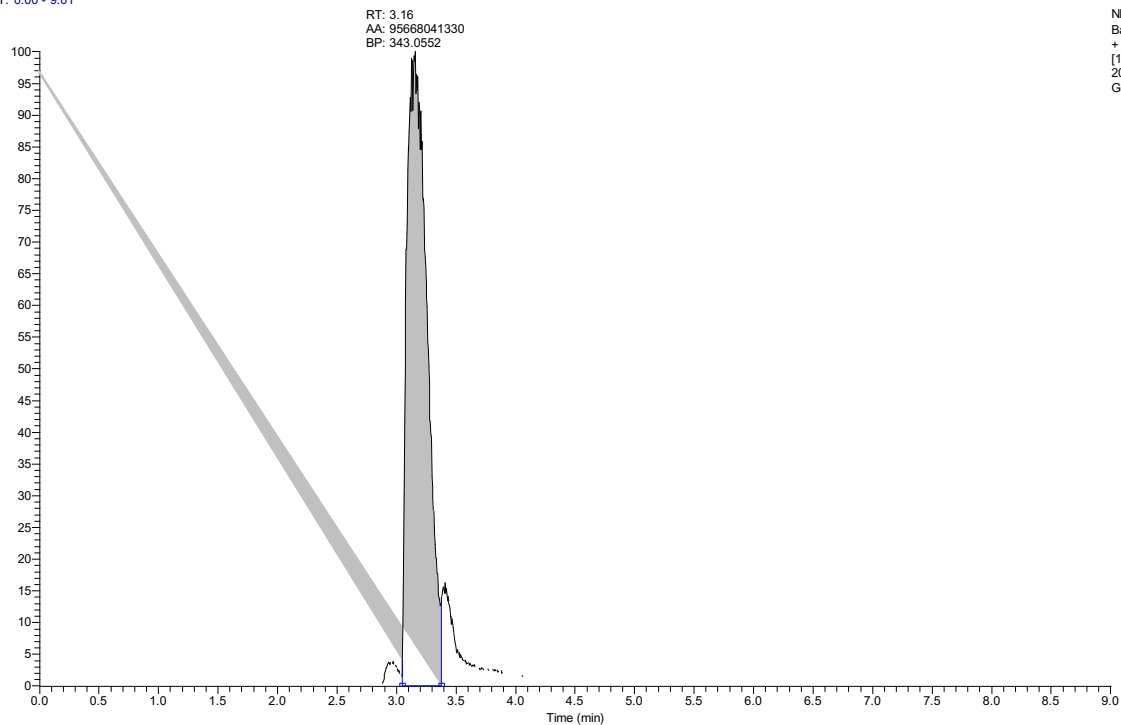

# LC Chromatogram LCMS

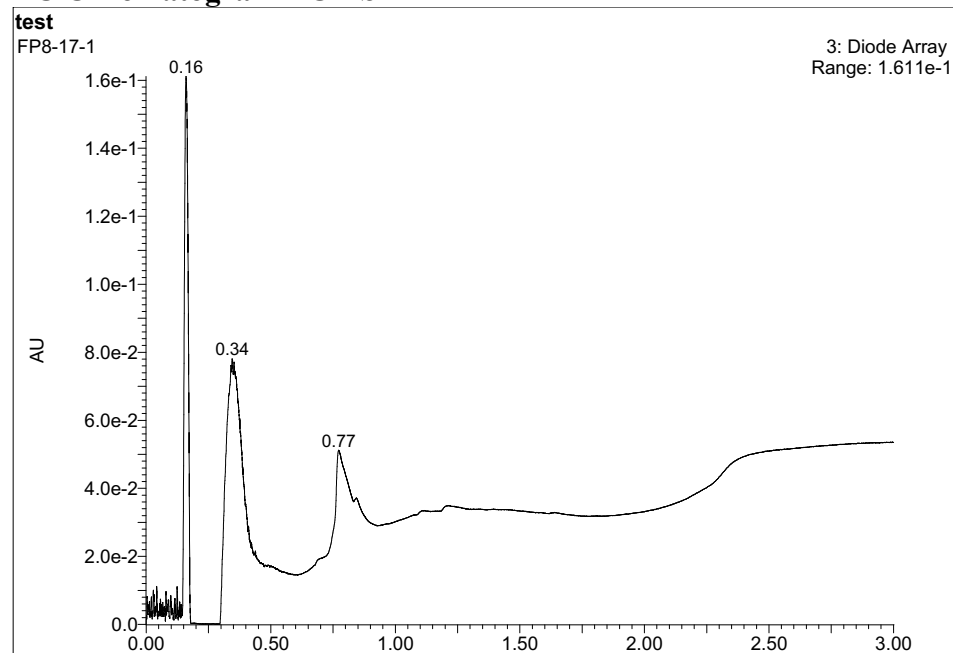

# HRMS

FP-17-1 #708-771 RT: 3.06-3.33 AV: 64 NL: 5.57E9  
T: FTMS + c ESI Full ms [150.0000-2000.0000]

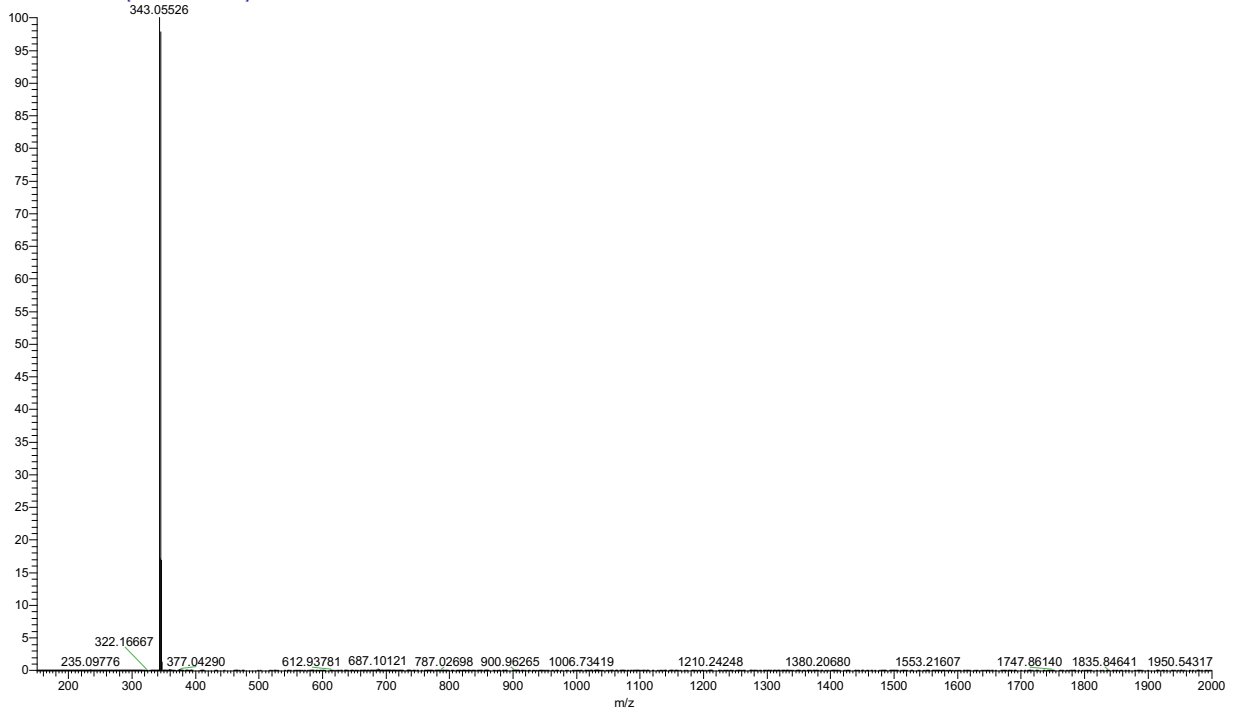

FP-17-1 #708-771 RT: 3.06-3.33 AV: 64 NL: 5.57E9  
T: FTMS + c ESI Full ms [150.0000-2000.0000]

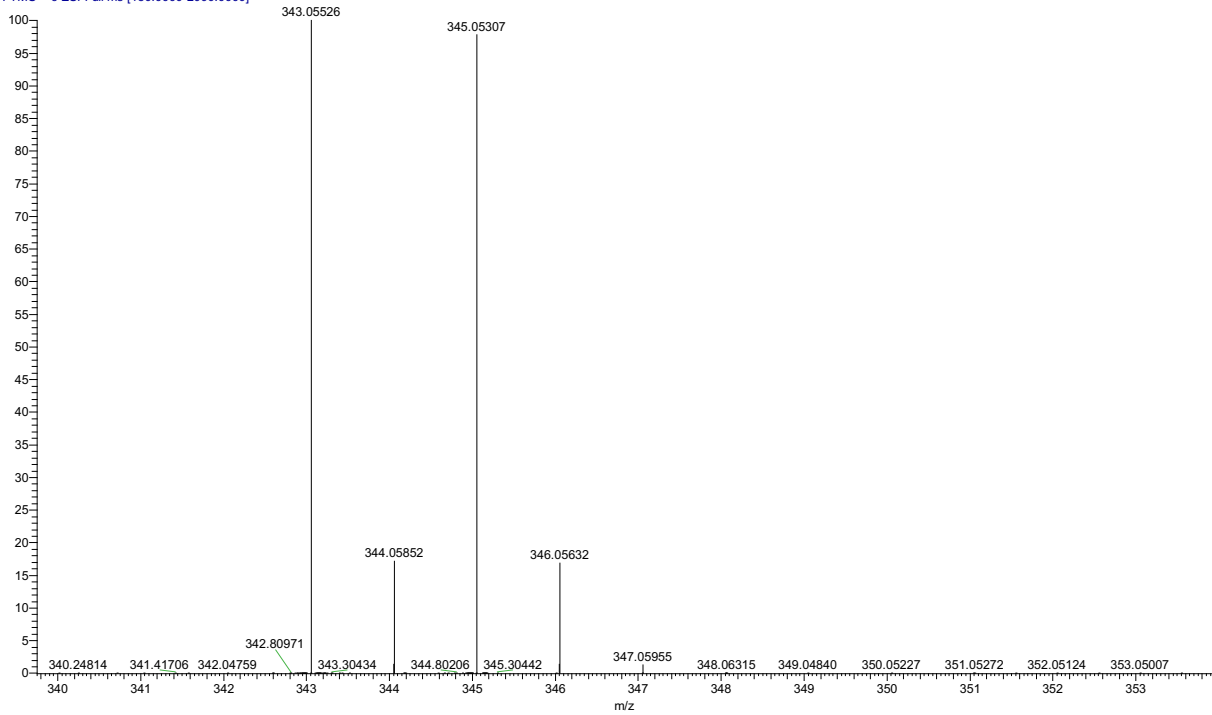

4-(2-amino-6,7-dihydro-5H-pyrimido[5,4-c]carbazol-10-yl)-2-methylbut-3-yn-2-ol (**1**).  
<sup>1</sup>H NMR

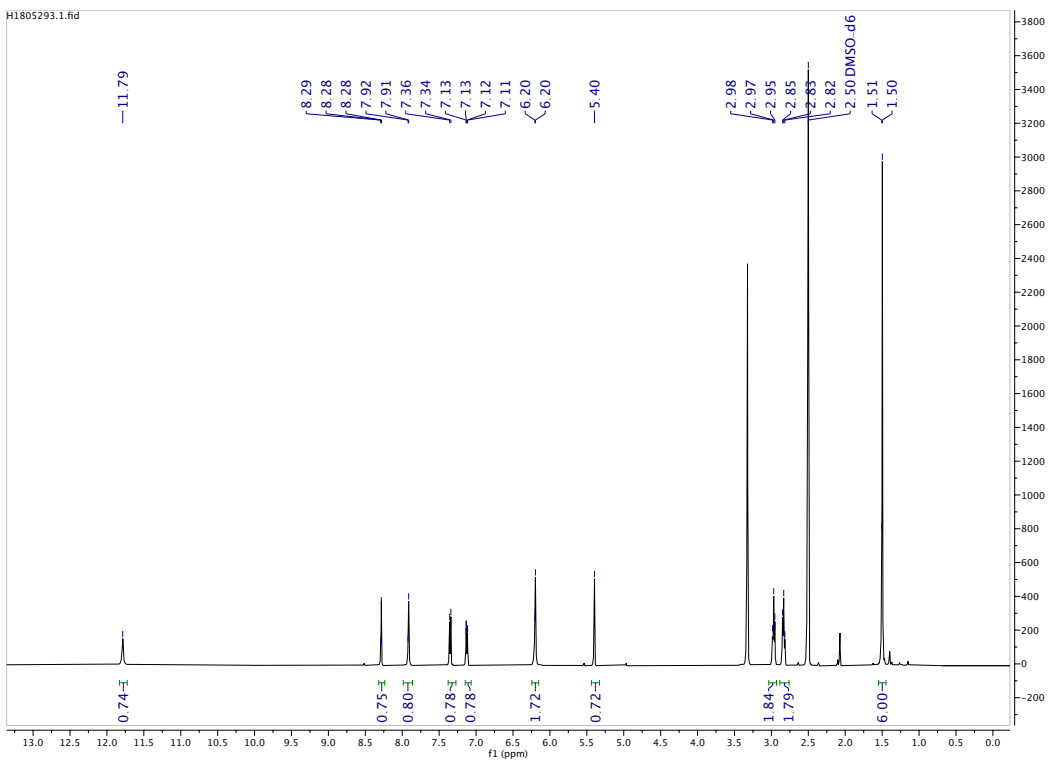

<sup>13</sup>C NMR

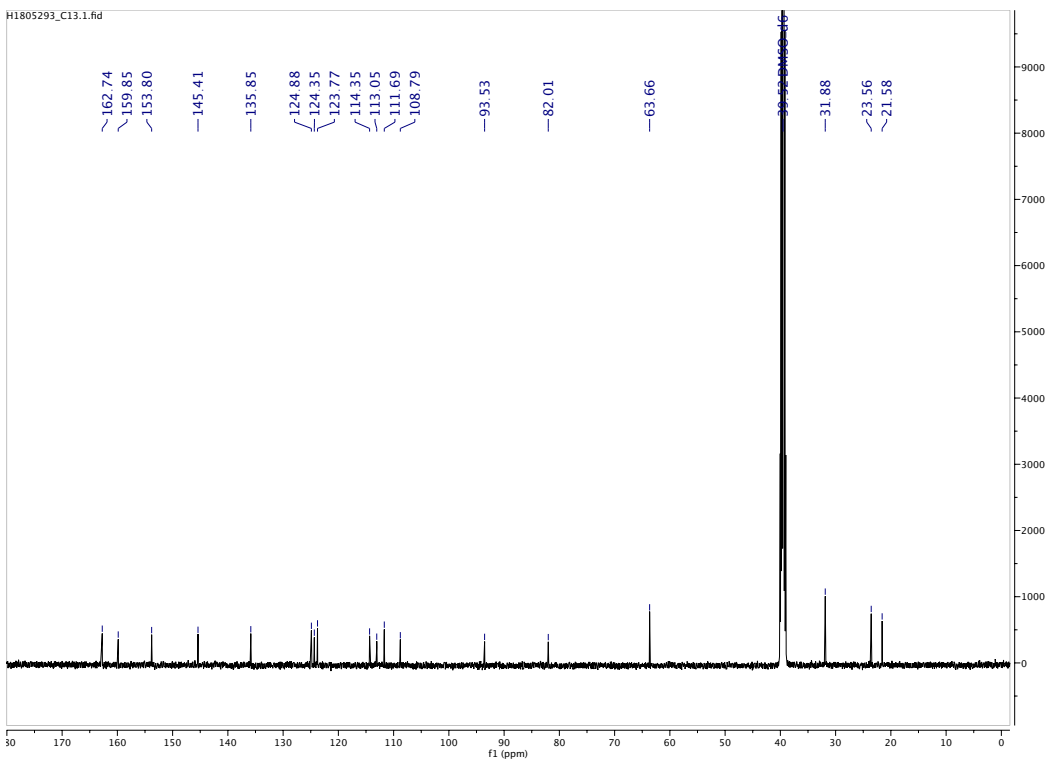

# LC Chromatogram

MaxPeak: 95.03%  
Ret\_Time: 0.916 min

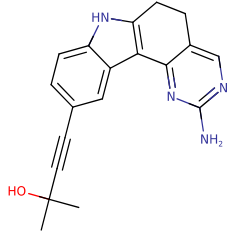

Mol Wt 318.37  
Exact Mass 318.17

| # | Time  | Area% |
|---|-------|-------|
| 1 | 0.916 | 95.03 |
| 2 | 0.973 | 4.97  |

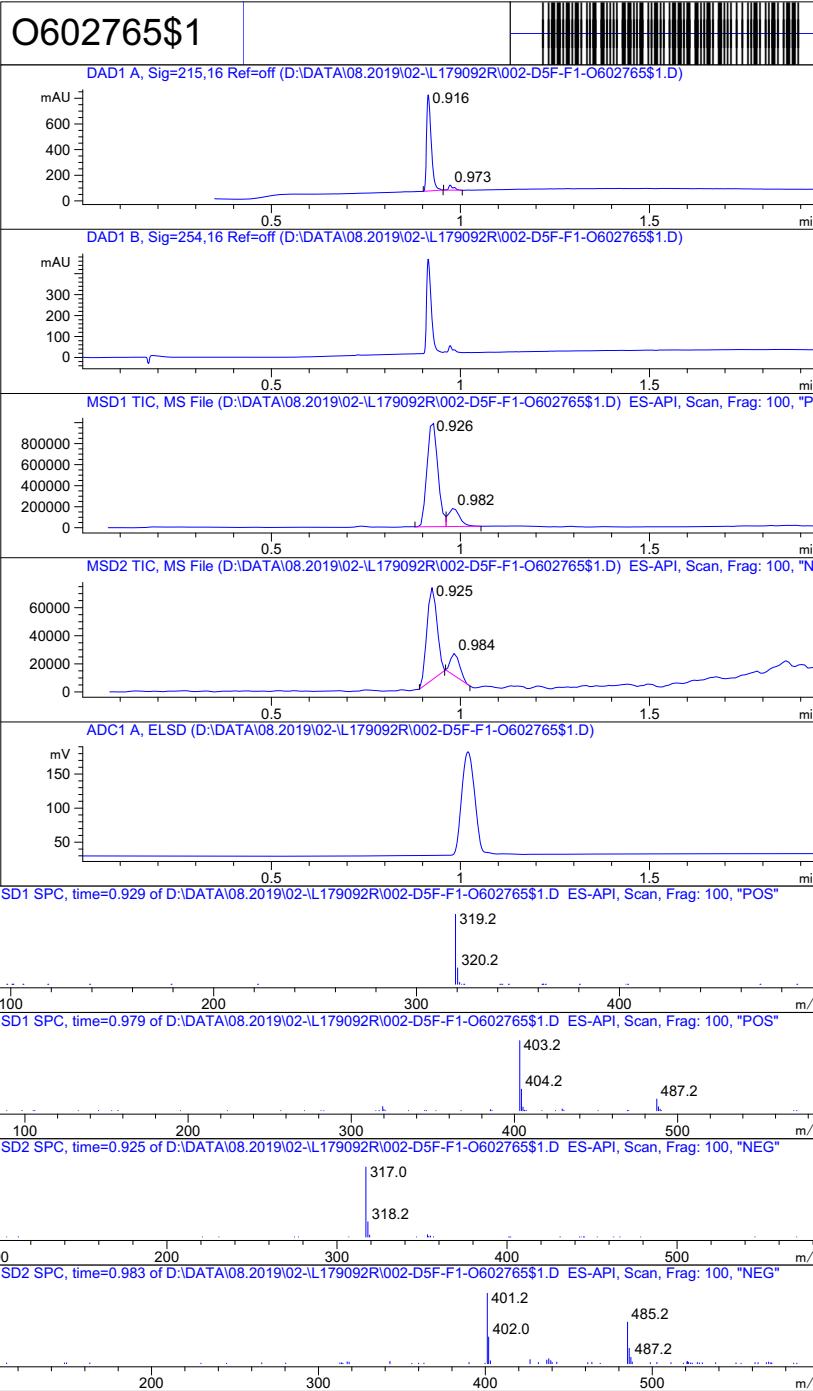

Inj.Date 8/2/2019

CH <invalid> -8-

Acq. Method C:\Chem32\ -> ->



Target Compound Screening Report

|                                 |                                        |                               |                                                     |
|---------------------------------|----------------------------------------|-------------------------------|-----------------------------------------------------|
| <b>Data File</b>                | H1805293.d                             | <b>Sample Name</b>            | H1805293                                            |
| <b>Sample Type</b>              | Sample                                 | <b>Position</b>               | P1-A5                                               |
| <b>Instrument Name</b>          | Instrument 1                           | <b>User Name</b>              | Denis V.Bylina                                      |
| <b>Acq Method</b>               | Fast_Gradient_HRMS_pos_Lock_08272019.m | <b>Acquired Time</b>          | 5/7/2021 6:14:09 PM (UTC+03:00)                     |
| <b>IRM Calibration Status</b>   | Success                                | <b>DA Method</b>              | Fast_Gradient_HRMS_pos_Lock_08272019.m              |
| <b>Comment</b>                  |                                        |                               |                                                     |
| <b>Sample Group</b>             |                                        | <b>Info.</b>                  |                                                     |
| <b>MFC</b>                      | C19H18N4O                              | <b>Stream Name</b>            | LC 1                                                |
| <b>Acquisition Time (Local)</b> | 5/7/2021 6:14:09 PM (UTC+03:00)        | <b>Acquisition SW Version</b> | 6200 series TOF/6500 series Q-TOF B.08.00 (B8058.0) |
| <b>TOF Driver Version</b>       | 8.00.00                                | <b>TOF Firmware Version</b>   | 8.643                                               |
| <b>Tune Mass Range Max.</b>     | 1700                                   |                               |                                                     |

Compound Table

| Label                      | Tgt Score | Mass Error (ppm) | Tgt Formula  | Obs. RT | Ref. Mass | Obs. Mass |
|----------------------------|-----------|------------------|--------------|---------|-----------|-----------|
| Cpd 1: C19 H18 N4 O; 2.165 | 82.72     | 0.85             | C19 H18 N4 O | 2.165   | 318.1481  | 318.1483  |

| Obs. m/z | Obs. RT | Obs. Mass | Tgt Formula  | Tgt Mass | Tgt Mass Error (ppm) | RT Diff.        | Find Cpds Algorithm |
|----------|---------|-----------|--------------|----------|----------------------|-----------------|---------------------|
| 319.1555 | 2.165   | 318.1483  | C19 H18 N4 O | 318.1481 | 0.85                 | Find By Formula |                     |

Compound Chromatograms

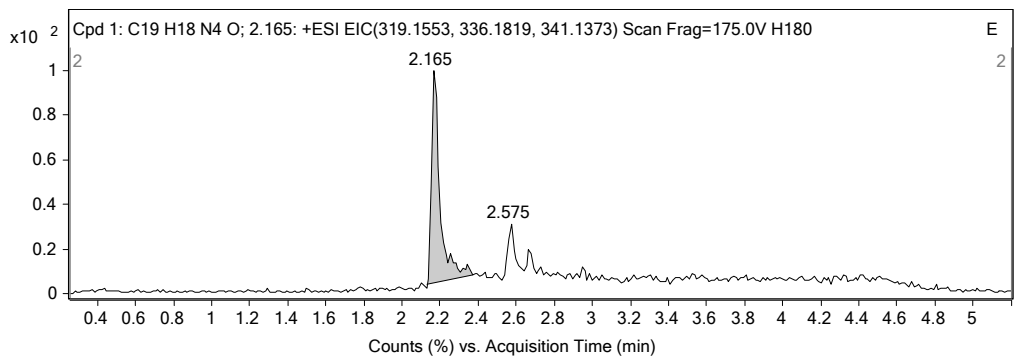

MS Zoomed Spectrum

4-(2-amino-5,6,7,8-tetrahydropyrimido[4',5':3,4]cyclohepta[1,2-b]indol-11-yl)-2-methylbut-3-yn-2-ol (AMG28).

<sup>1</sup>H NMR

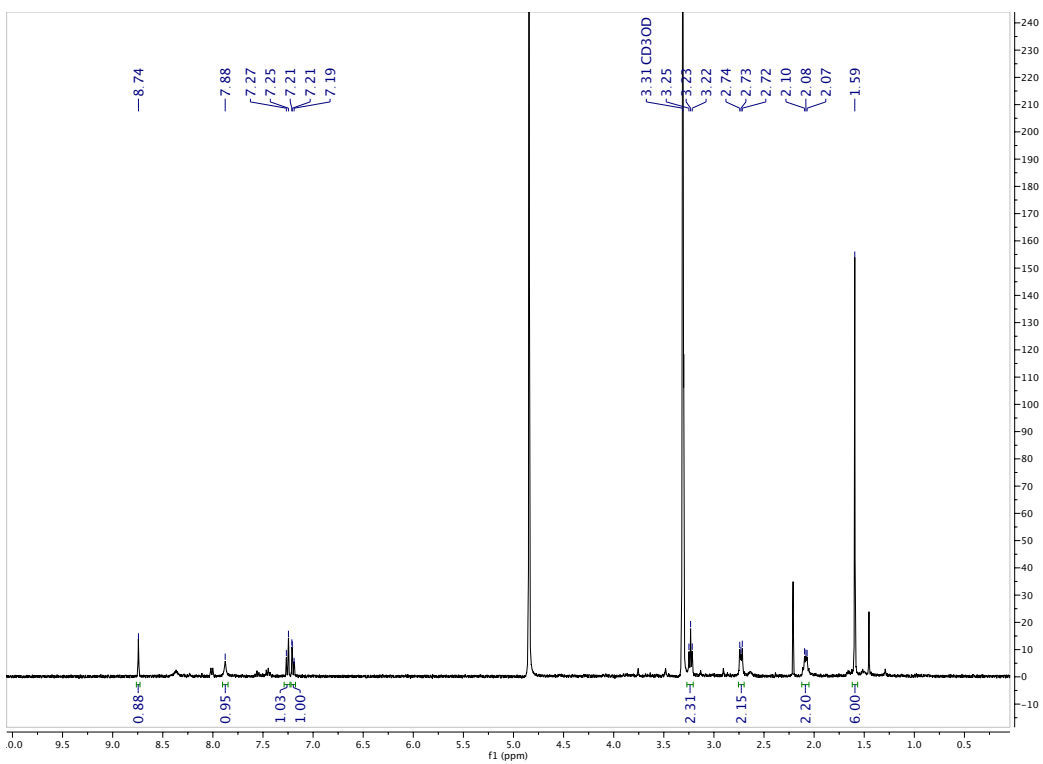

# LC Chromatogram

MaxPeak: 96.35%  
Ret\_Time: 0.961 min

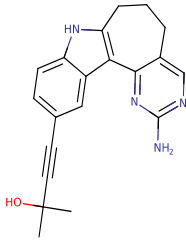

Mol Wt 332.4  
Exact Mass 332.19

| # | Time  | Area% |
|---|-------|-------|
| 1 | 0.940 | 3.65  |
| 2 | 0.961 | 96.35 |

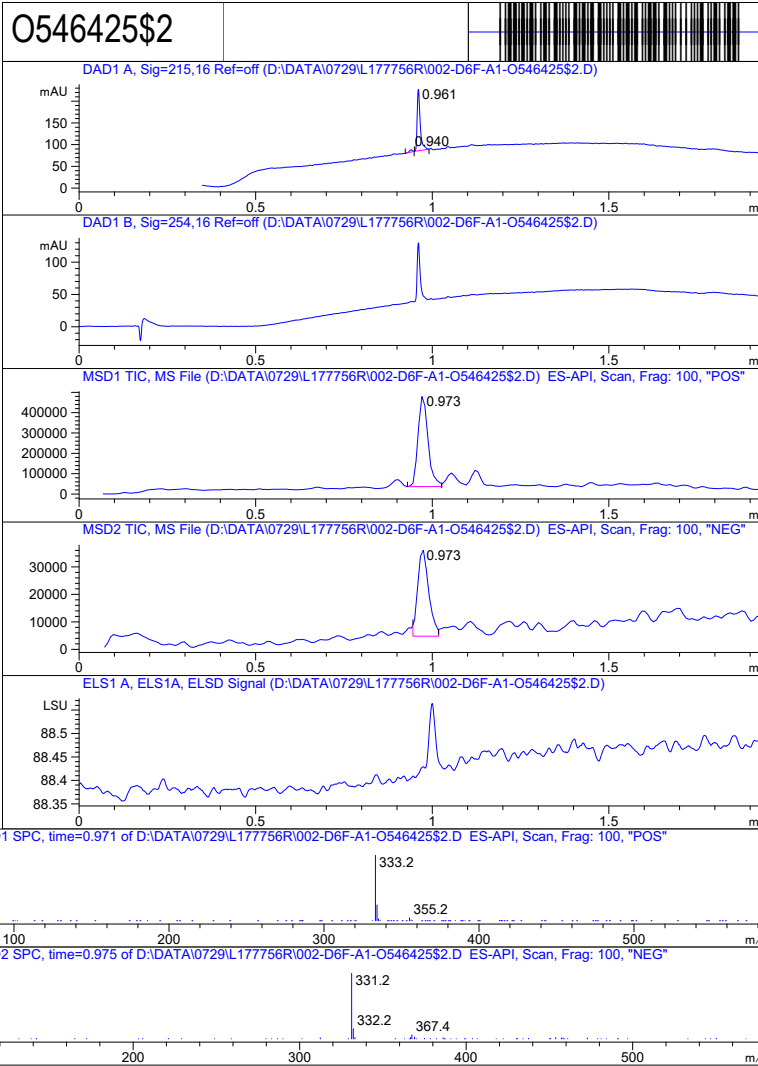

Inj.Date 7/29/2019

LT <invalid> 13

Acq. Method C:\Chem32\ -> ->

4-(2-amino-6,7,8,9-tetrahydro-5H-pyrimido[4',5':3,4]cycloocta[1,2-b]indol-12-yl)-2-methylbut-3-yn-2-ol (2).

<sup>1</sup>H NMR

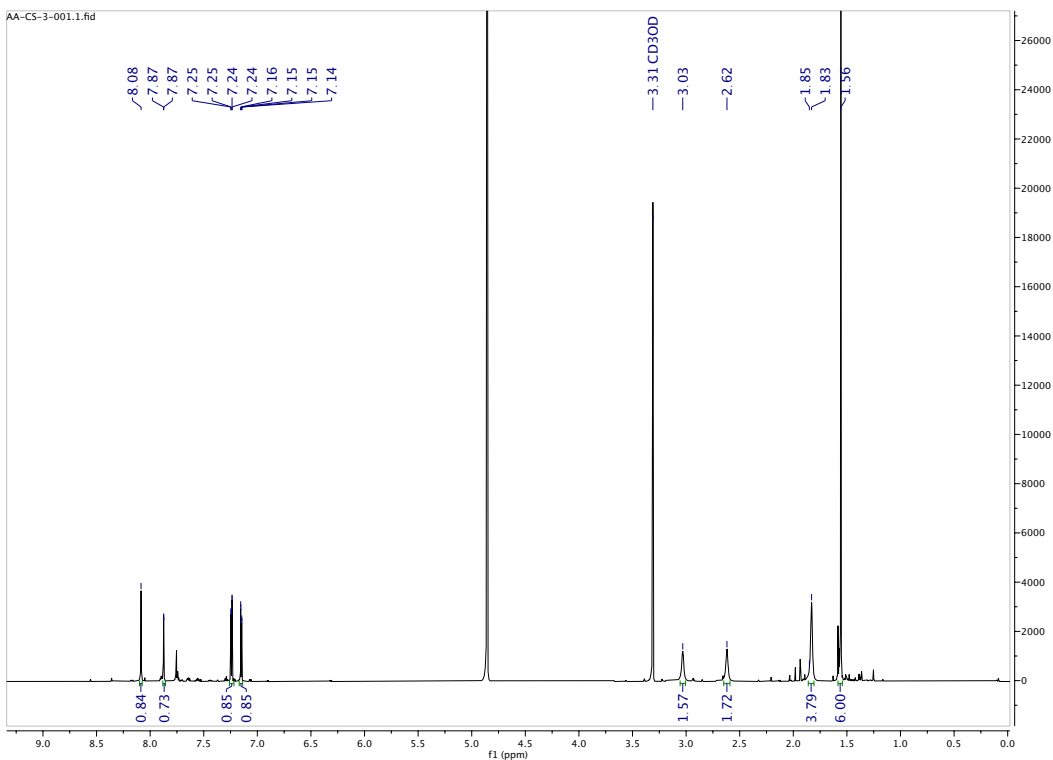

<sup>13</sup>C NMR

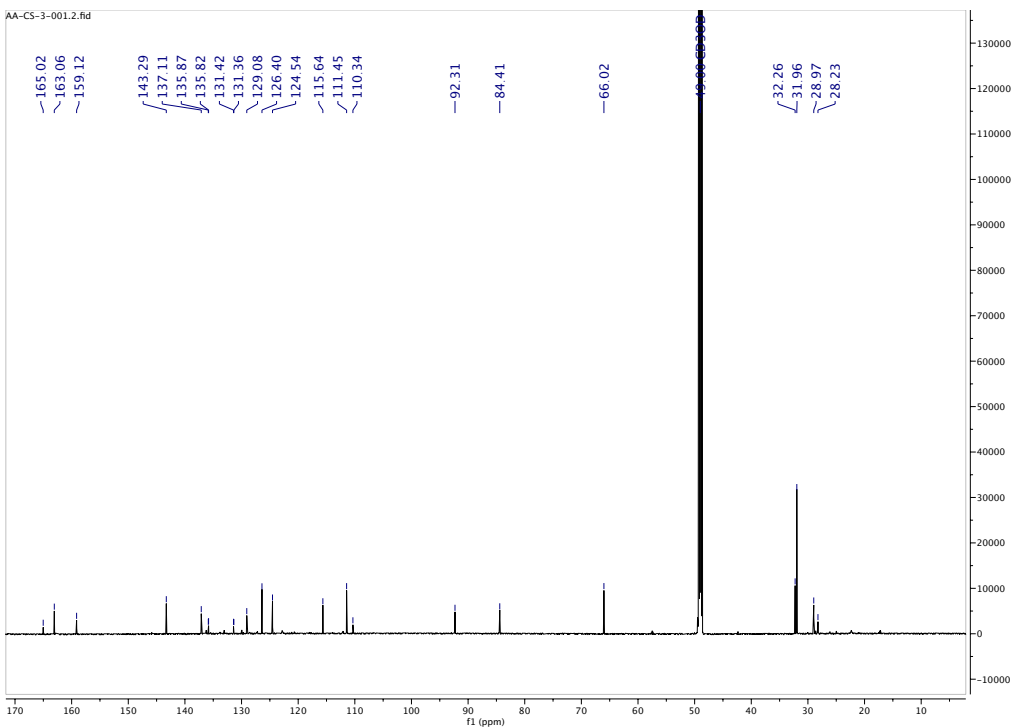

# LC Chromatogram

MaxPeak: 95.56%  
Ret\_Time: 0.990 min

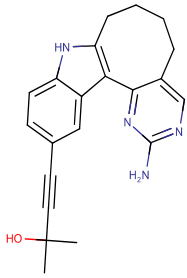

Mol Wt 346.43  
Exact Mass 346.21

| # | Time  | Area% |
|---|-------|-------|
| 1 | 0.990 | 95.56 |
| 2 | 1.055 | 2.18  |
| 3 | 1.141 | 2.26  |

0518950\$2

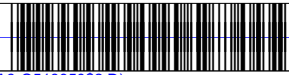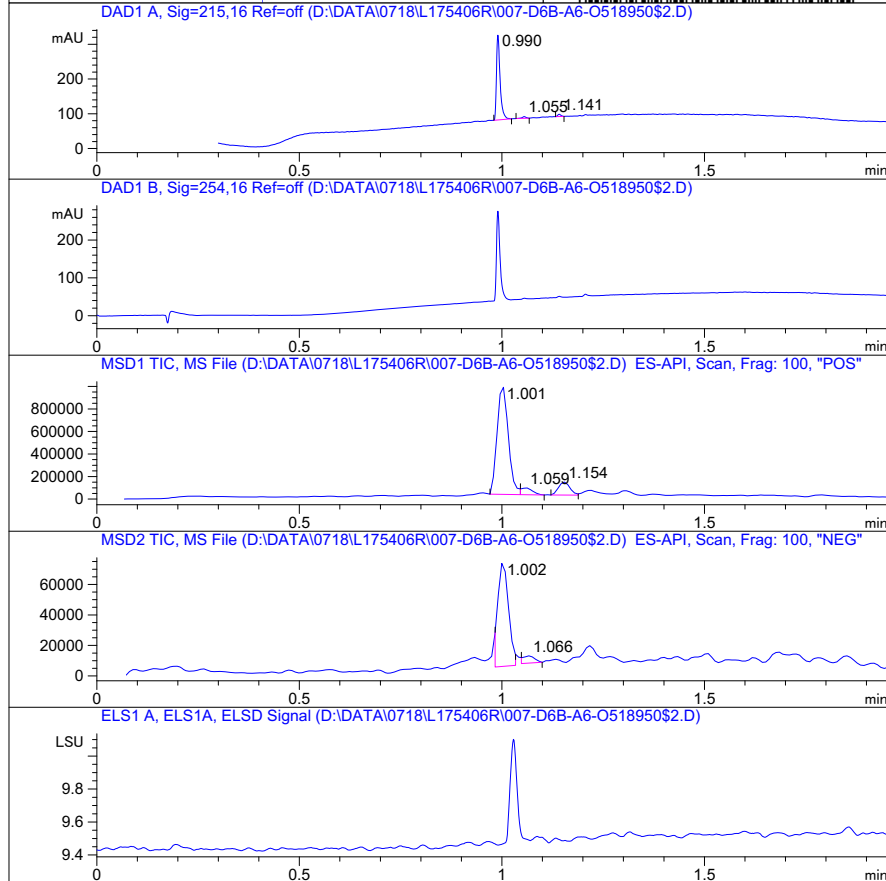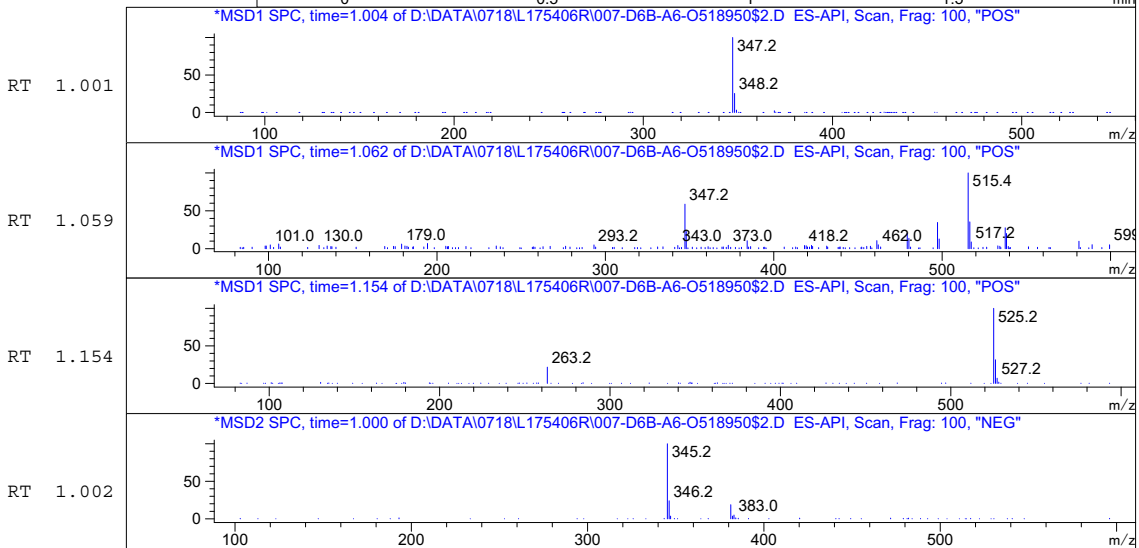

Inj.Date 7/18/2019

LT <invalid> 13

Acq. Method C:\Chem32\ -> ->

Target Compound Screening Report

|                                 |                                        |                               |                                                     |
|---------------------------------|----------------------------------------|-------------------------------|-----------------------------------------------------|
| <b>Data File</b>                | H1785737.d                             | <b>Sample Name</b>            | H1785737                                            |
| <b>Sample Type</b>              | Sample                                 | <b>Position</b>               | P1-D4                                               |
| <b>Instrument Name</b>          | Instrument 1                           | <b>User Name</b>              | Denis V.Bylina                                      |
| <b>Acq Method</b>               | Fast_Gradient_HRMS_pos_Lock_08272019.m | <b>Acquired Time</b>          | 5/7/2021 8:03:12 PM (UTC+03:00)                     |
| <b>IRM Calibration Status</b>   | Success                                | <b>DA Method</b>              | Fast_Gradient_HRMS_pos_Lock_08272019.m              |
| <b>Comment</b>                  |                                        |                               |                                                     |
| <b>Sample Group</b>             |                                        | <b>Info.</b>                  |                                                     |
| <b>MFC</b>                      | C21H22N4O                              | <b>Stream Name</b>            | LC 1                                                |
| <b>Acquisition Time (Local)</b> | 5/7/2021 8:03:12 PM (UTC+03:00)        | <b>Acquisition SW Version</b> | 6200 series TOF/6500 series Q-TOF B.08.00 (B8058.0) |
| <b>TOF Driver Version</b>       | 8.00.00                                | <b>TOF Firmware Version</b>   | 8.643                                               |
| <b>Tune Mass Range Max.</b>     | 1700                                   |                               |                                                     |

Compound Table

| Label                      | Tgt Score | Mass Error (ppm) | Tgt Formula  | Obs. RT | Ref. Mass | Obs. Mass |
|----------------------------|-----------|------------------|--------------|---------|-----------|-----------|
| Cpd 2: C21 H22 N4 O; 2.294 | 98.87     | 0.5              | C21 H22 N4 O | 2.294   | 346.1794  | 346.1795  |
| Cpd 1: C21 H22 N4 O; 2.409 | 78.19     | -0.43            | C21 H22 N4 O | 2.409   | 346.1794  | 346.1792  |

| Obs. m/z | Obs. RT | Obs. Mass | Tgt Formula  | Tgt Mass | Tgt Mass Error (ppm) | RT Diff.        | Find Cpds Algorithm |
|----------|---------|-----------|--------------|----------|----------------------|-----------------|---------------------|
| 347.1868 | 2.294   | 346.1795  | C21 H22 N4 O | 346.1794 | 0.5                  | Find By Formula |                     |

Compound Chromatograms

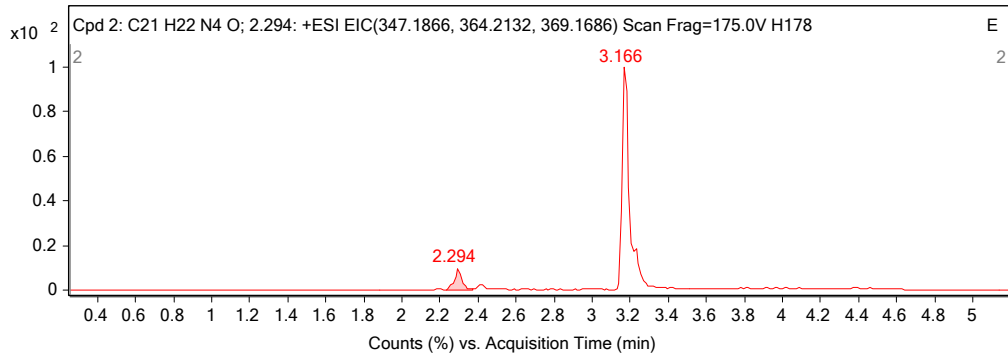

MS Zoomed Spectrum

4-(3-(2-aminopyrimidin-4-yl)-1H-indol-5-yl)-2-methylbut-3-yn-2-ol (3).  
<sup>1</sup>H NMR

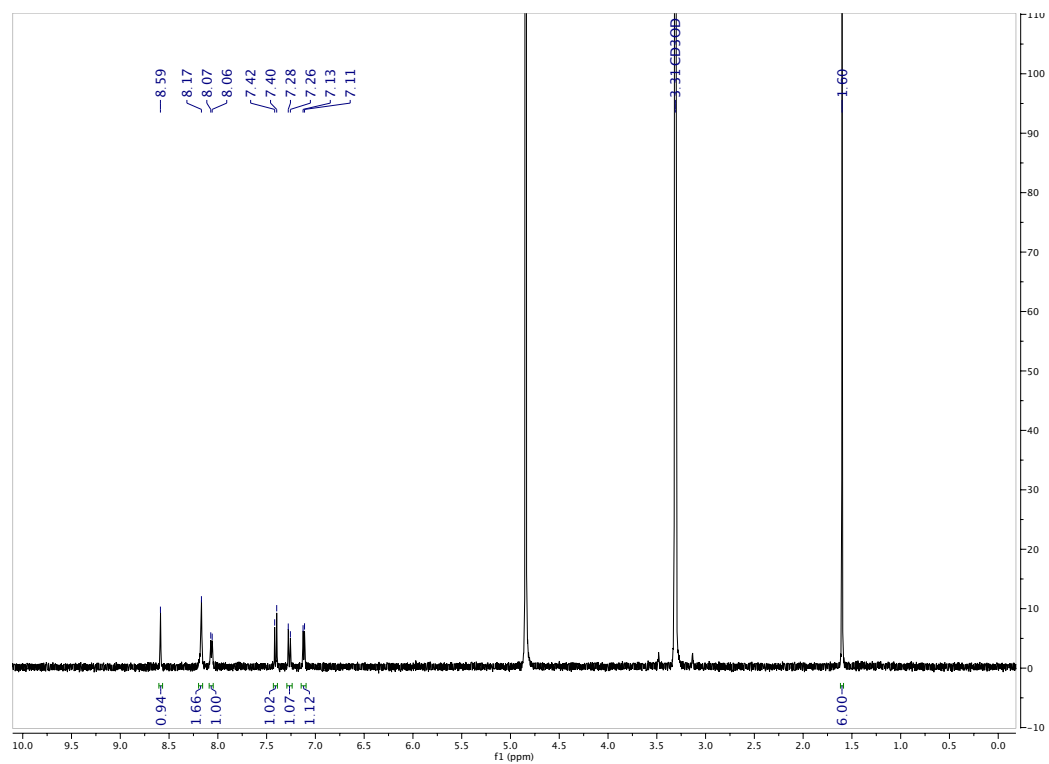

# LC Chromatogram

MaxPeak: 100.00%  
Ret\_Time: 0.771 min

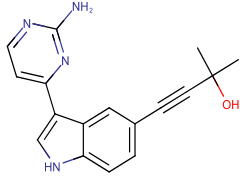

Mol Wt 292.33

Exact Mass 292.15

| # | Time  | Area%  |
|---|-------|--------|
| 1 | 0.771 | 100.00 |

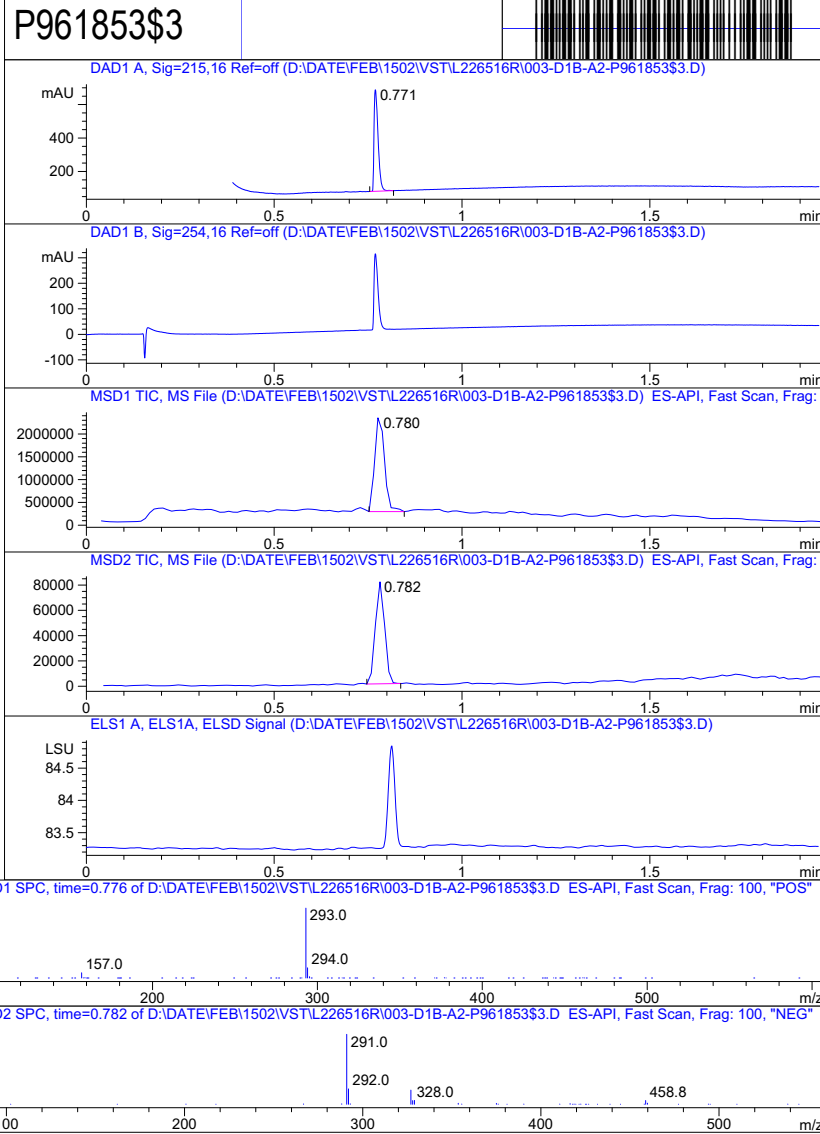

Inj.Date 2/17/2020

Y

Acq. Method C:\Users\ -> ->



Target Compound Screening Report

|                                 |                                        |                               |                                                     |
|---------------------------------|----------------------------------------|-------------------------------|-----------------------------------------------------|
| <b>Data File</b>                | H2233612a.d                            | <b>Sample Name</b>            | H2233612                                            |
| <b>Sample Type</b>              | Sample                                 | <b>Position</b>               | P1-E2                                               |
| <b>Instrument Name</b>          | Instrument 1                           | <b>User Name</b>              | Denis V.Bylina                                      |
| <b>Acq Method</b>               | Fast_Gradient_HRMS_pos_Lock_08272019.m | <b>Acquired Time</b>          | 5/7/2021 9:01:20 PM (UTC+03:00)                     |
| <b>IRM Calibration Status</b>   | Success                                | <b>DA Method</b>              | Fast_Gradient_HRMS_pos_Lock_08272019.m              |
| <b>Comment</b>                  |                                        | <b>Info.</b>                  |                                                     |
| <b>Sample Group</b>             |                                        | <b>Stream Name</b>            | LC 1                                                |
| <b>MFC</b>                      | C17H16N4O                              | <b>Acquisition SW Version</b> | 6200 series TOF/6500 series Q-TOF B.08.00 (B8058.0) |
| <b>Acquisition Time (Local)</b> | 5/7/2021 9:01:20 PM (UTC+03:00)        | <b>TOF Firmware Version</b>   | 8.643                                               |
| <b>TOF Driver Version</b>       | 8.00.00                                |                               |                                                     |
| <b>Tune Mass Range Max.</b>     | 1700                                   |                               |                                                     |

Compound Table

| Label                      | Tgt Score | Mass Error (ppm) | Tgt Formula  | Obs. RT | Ref. Mass | Obs. Mass |
|----------------------------|-----------|------------------|--------------|---------|-----------|-----------|
| Cpd 1: C17 H16 N4 O; 2.110 | 96.35     | -0.02            | C17 H16 N4 O | 2.11    | 292.1324  | 292.1324  |

| Obs. m/z | Obs. RT | Obs. Mass | Tgt Formula  | Tgt Mass | Tgt Mass Error (ppm) | RT Diff.        | Find Cpds Algorithm |
|----------|---------|-----------|--------------|----------|----------------------|-----------------|---------------------|
| 293.1397 | 2.11    | 292.1324  | C17 H16 N4 O | 292.1324 | -0.02                | Find By Formula |                     |

Compound Chromatograms

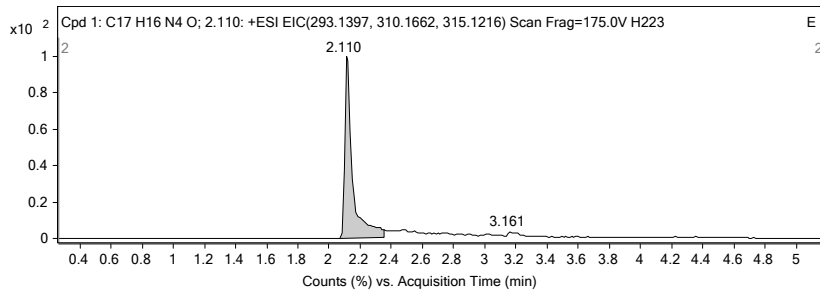

MS Zoomed Spectrum

10-(pyridin-4-ylethynyl)-6,7-dihydro-5H-pyrimido[5,4-c]carbazol-2-amine (4).  
<sup>1</sup>H NMR

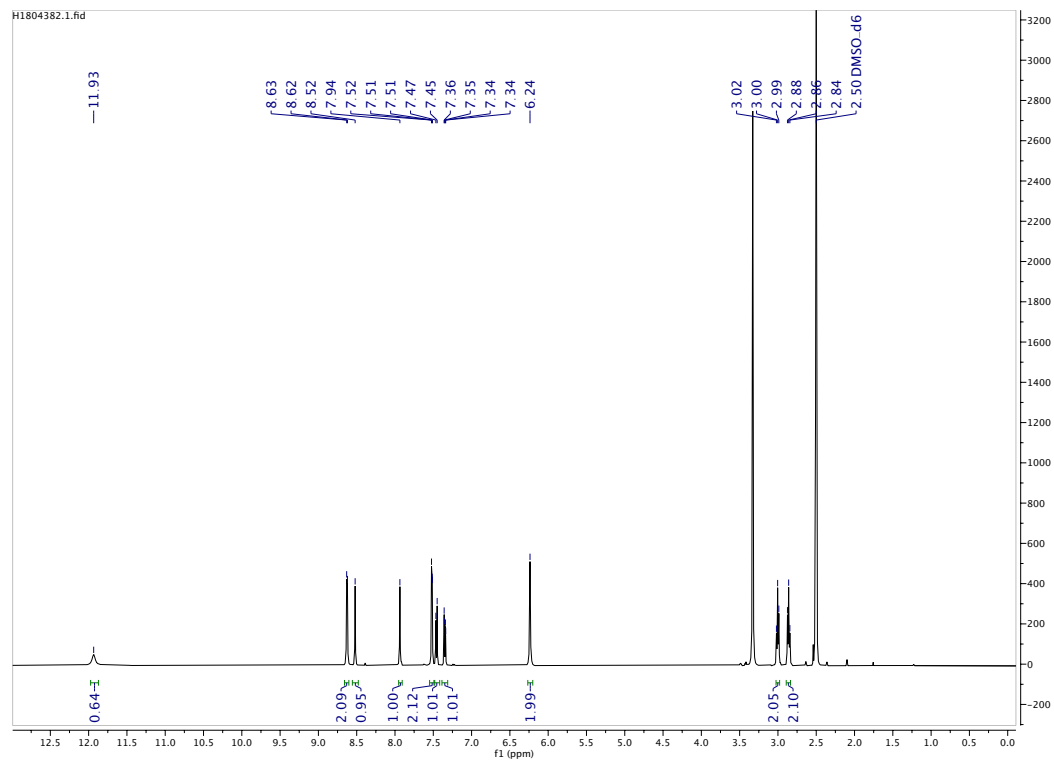

<sup>13</sup>C NMR

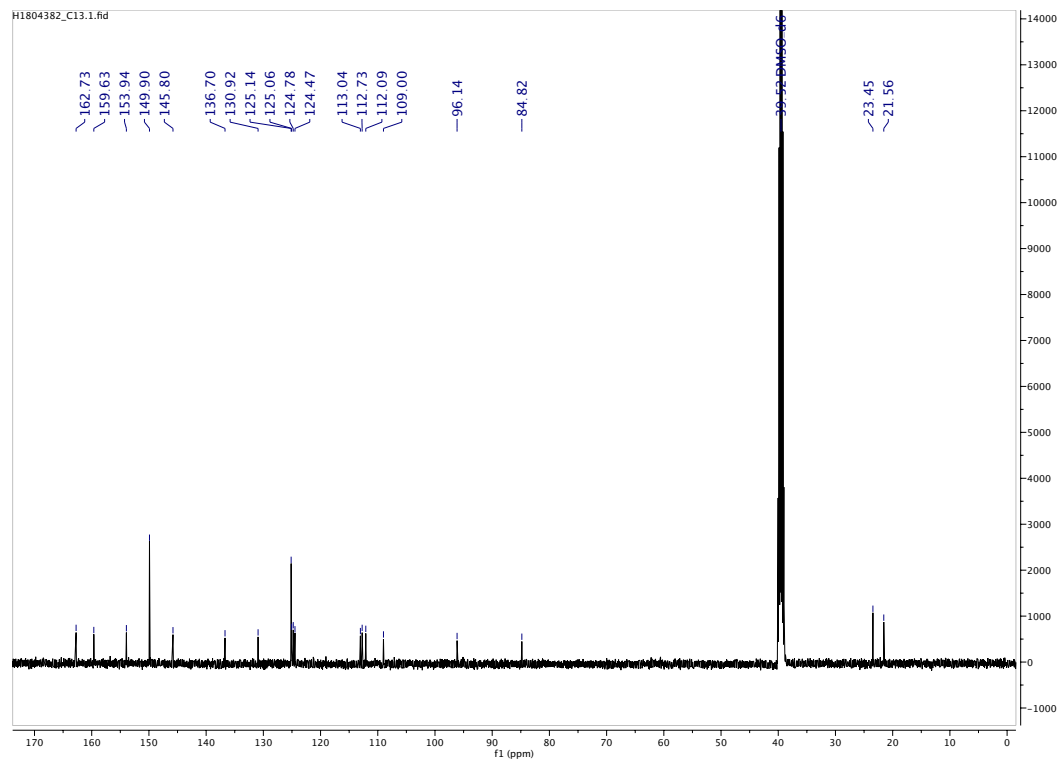

# LC Chromatogram

MaxPeak: 96.28%  
Ret\_Time: 0.858 min

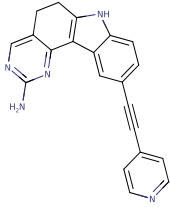

Mol Wt 337.38  
Exact Mass 337.15

| # | Time  | Area% |
|---|-------|-------|
| 1 | 0.858 | 96.28 |
| 2 | 0.975 | 3.72  |

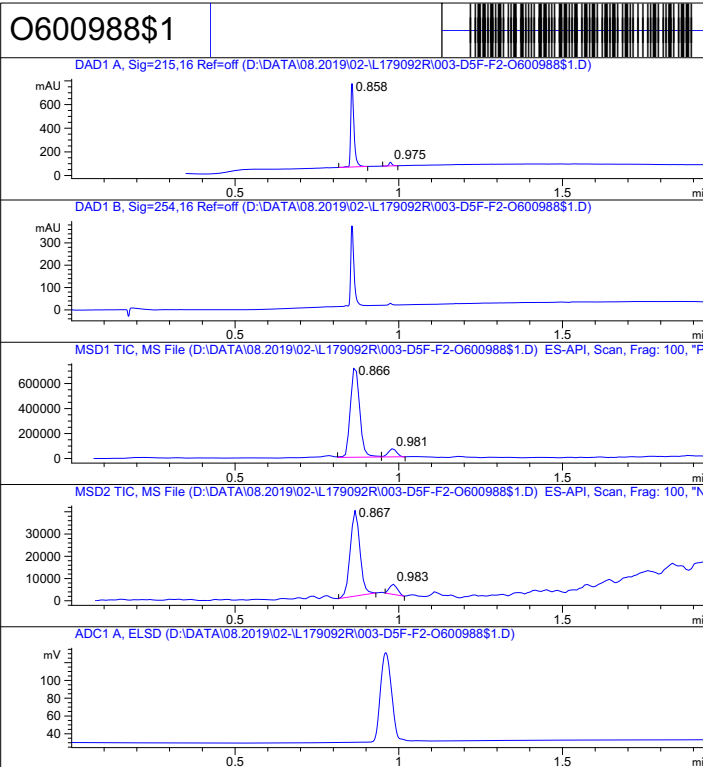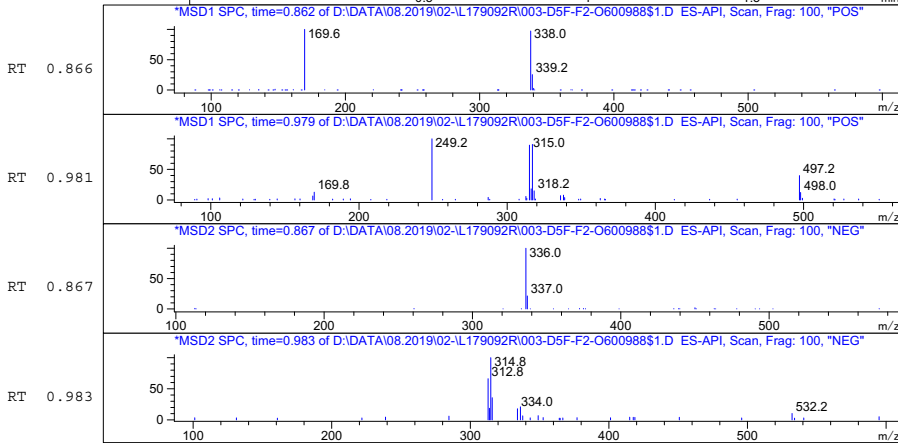

Inj.Date 8/2/2019

CH <invalid> -8-

Acq. Method C:\Chem32\ -> ->

Target Compound Screening Report

|                                 |                                        |                               |                                                     |
|---------------------------------|----------------------------------------|-------------------------------|-----------------------------------------------------|
| <b>Data File</b>                | H1804382.d                             | <b>Sample Name</b>            | H1804382                                            |
| <b>Sample Type</b>              | Sample                                 | <b>Position</b>               | P1-A9                                               |
| <b>Instrument Name</b>          | Instrument 1                           | <b>User Name</b>              | Denis V.Bylina                                      |
| <b>Acq Method</b>               | Fast_Gradient_HRMS_pos_Lock_08272019.m | <b>Acquired Time</b>          | 5/7/2021 6:38:24 PM (UTC+03:00)                     |
| <b>IRM Calibration Status</b>   | Success                                | <b>DA Method</b>              | Fast_Gradient_HRMS_pos_Lock_08272019.m              |
| <b>Comment</b>                  |                                        |                               |                                                     |
| <b>Sample Group</b>             |                                        | <b>Info.</b>                  |                                                     |
| <b>MFC</b>                      | C21H15N5                               | <b>Stream Name</b>            | LC 1                                                |
| <b>Acquisition Time (Local)</b> | 5/7/2021 6:38:24 PM (UTC+03:00)        | <b>Acquisition SW Version</b> | 6200 series TOF/6500 series Q-TOF B.08.00 (B8058.0) |
| <b>TOF Driver Version</b>       | 8.00.00                                | <b>TOF Firmware Version</b>   | 8.643                                               |
| <b>Tune Mass Range Max.</b>     | 1700                                   |                               |                                                     |

Compound Table

| Label                    | Tgt Score | Mass Error (ppm) | Tgt Formula | Obs. RT | Ref. Mass | Obs. Mass |
|--------------------------|-----------|------------------|-------------|---------|-----------|-----------|
| Cpd 1: C21 H15 N5; 2.012 | 81.24     | -0.22            | C21 H15 N5  | 2.012   | 337.1327  | 337.1327  |

| Obs. m/z | Obs. RT | Obs. Mass | Tgt Formula | Tgt Mass | Tgt Mass Error (ppm) | RT Diff.        | Find Cpds Algorithm |
|----------|---------|-----------|-------------|----------|----------------------|-----------------|---------------------|
| 338.1393 | 2.012   | 337.1327  | C21 H15 N5  | 337.1327 | -0.22                | Find By Formula |                     |

Compound Chromatograms

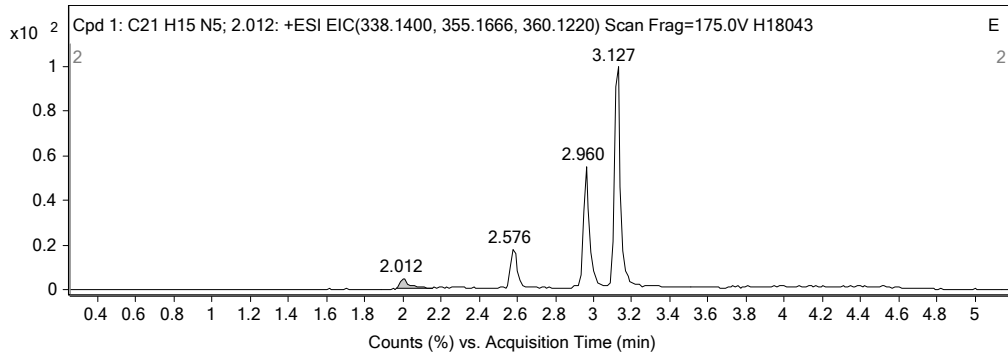

MS Zoomed Spectrum

11-(pyridin-4-ylethynyl)-5,6,7,8-tetrahydropyrimido[4',5':3,4]cyclohepta[1,2-b]indol-2-amine  
(5).

<sup>1</sup>H NMR

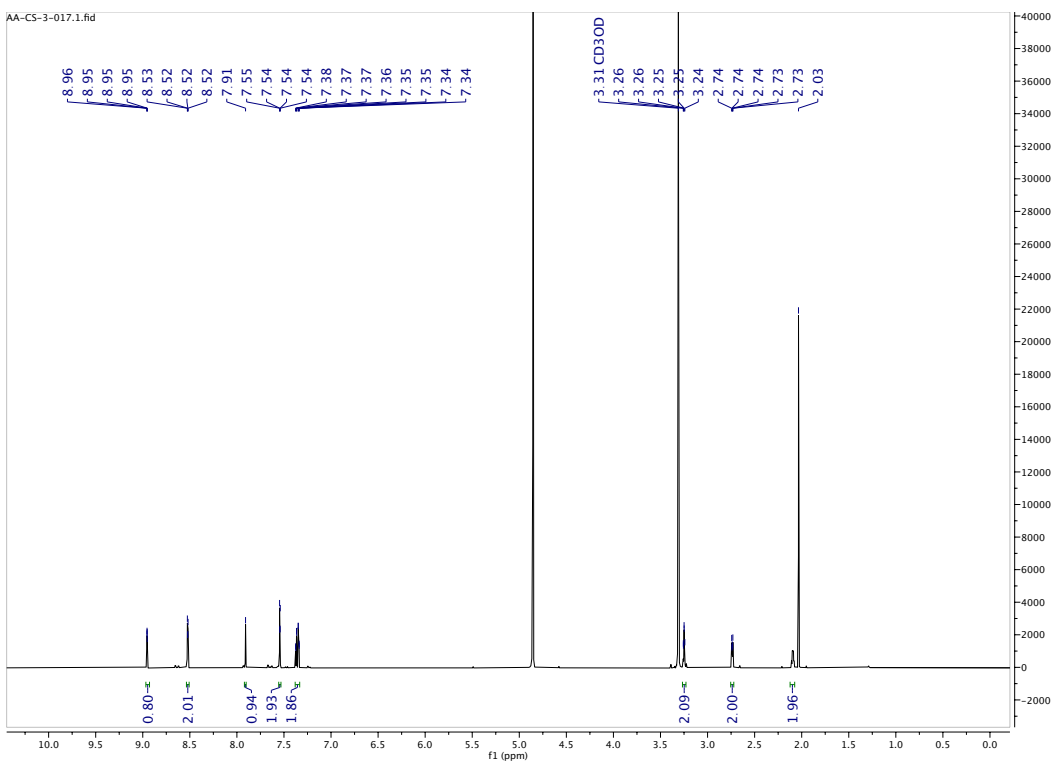

<sup>13</sup>C NMR

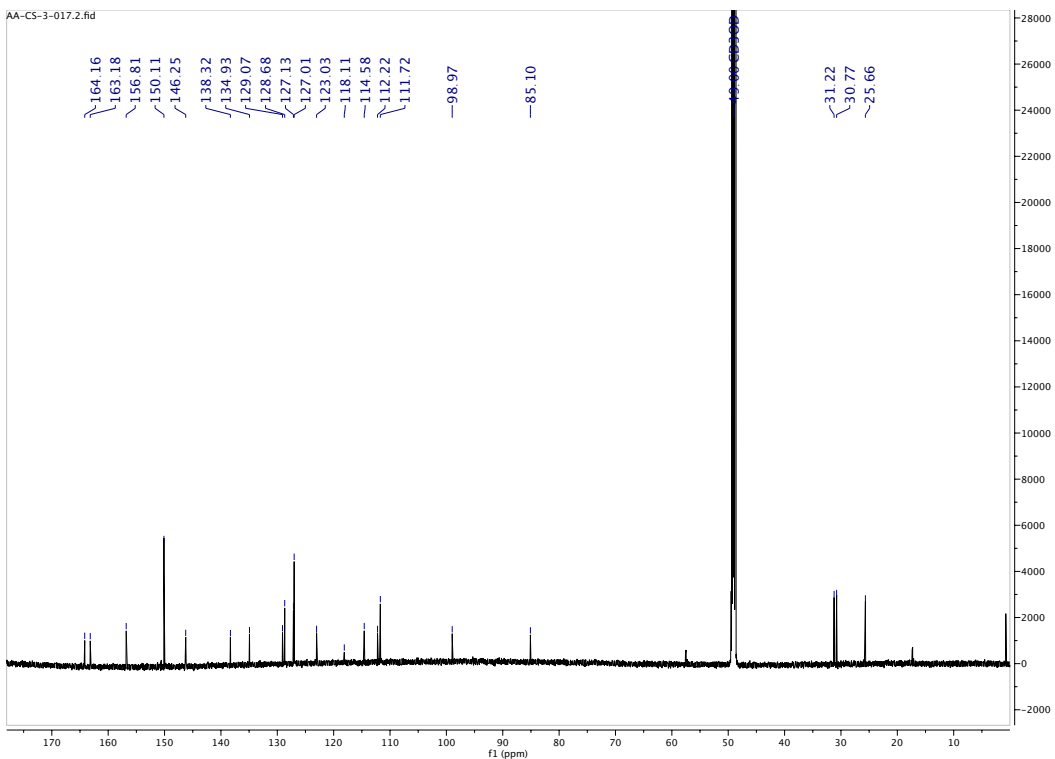

# LC Chromatogram

MaxPeak: 96.99%  
Ret\_Time: 1.253 min

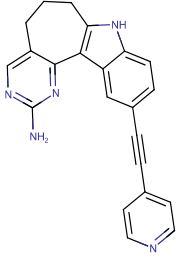

Mol Wt 351.4  
Exact Mass 351.17

| # | Time  | Area% |
|---|-------|-------|
| 1 | 1.253 | 96.99 |
| 2 | 1.336 | 3.01  |

O614479\$21

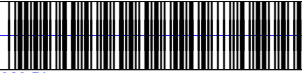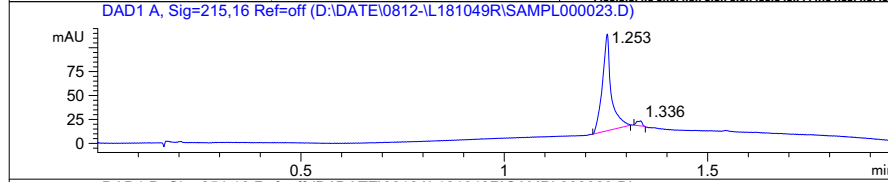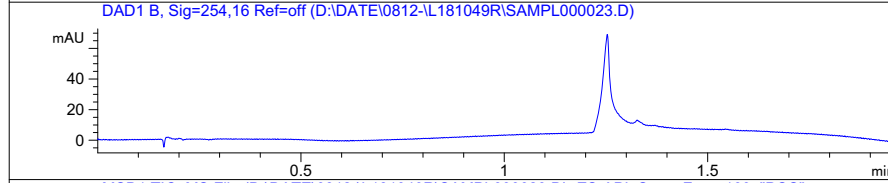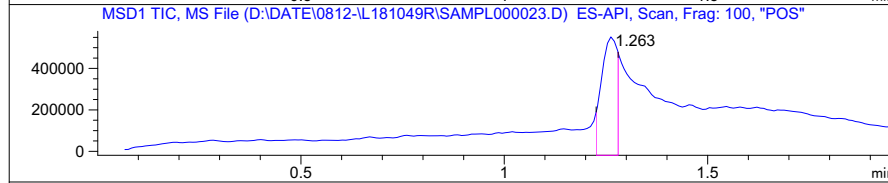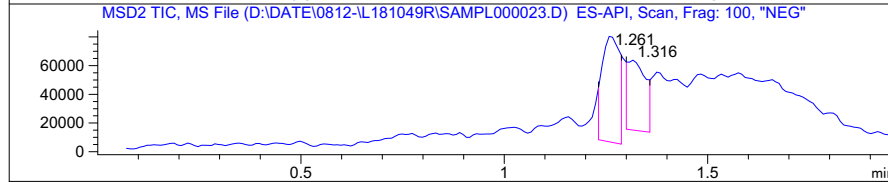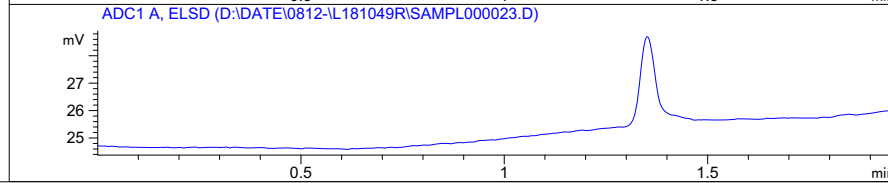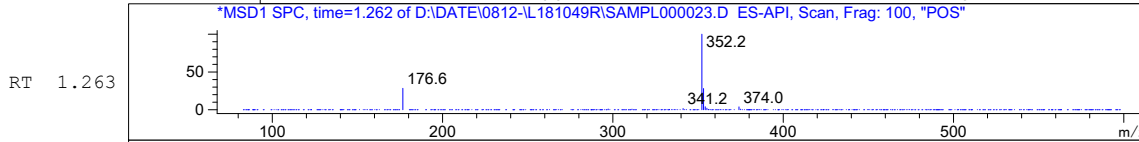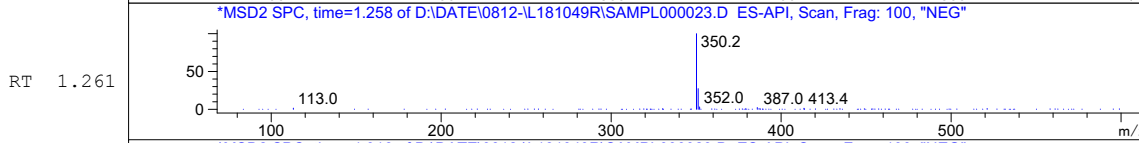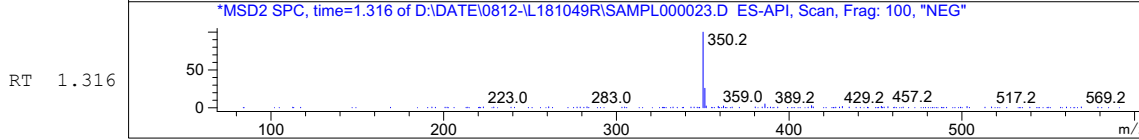

Inj.Date 8/12/2019

E

P2-F-02

-6-

Acq. Method C:\CHEM32\ -> ->

# HRMS

AA-3-17 #593-658 RT: 2.56-2.84 AV: 66 NL: 1.44E8  
T: FTMS + c ESI Full ms [150.0000-2000.0000]

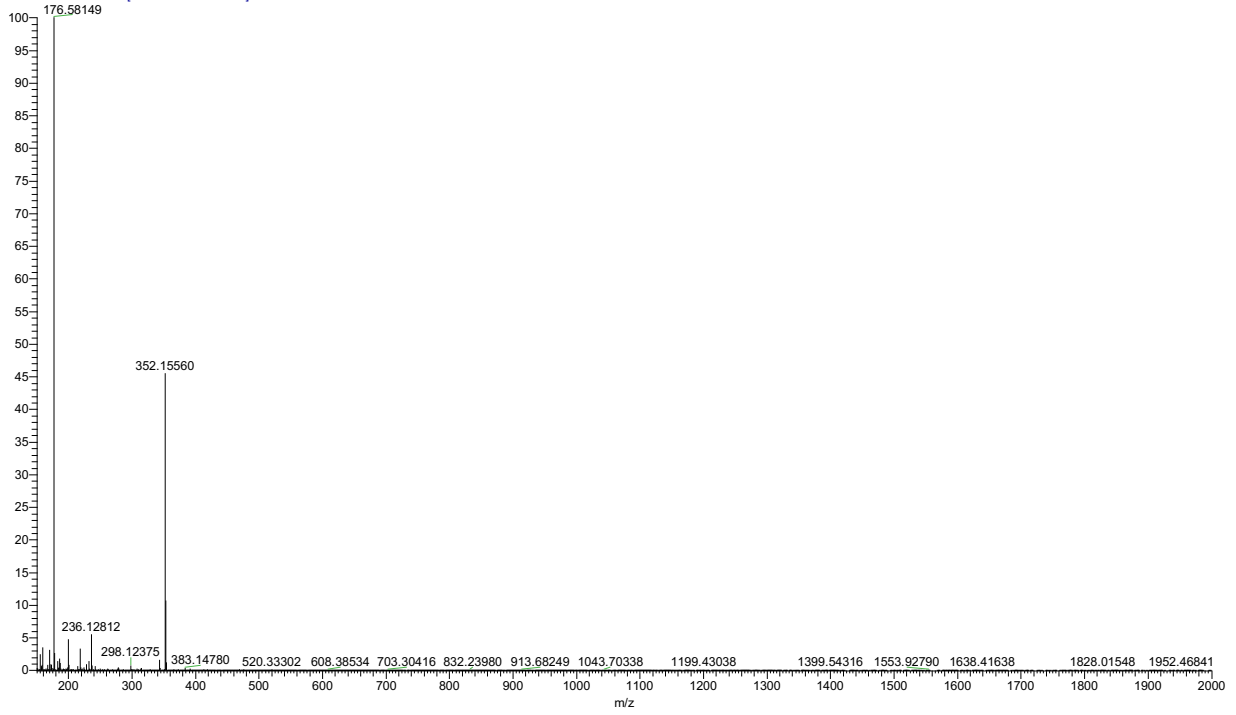

AA-3-17 #593-658 RT: 2.56-2.84 AV: 66 NL: 6.54E7  
T: FTMS + c ESI Full ms [150.0000-2000.0000]

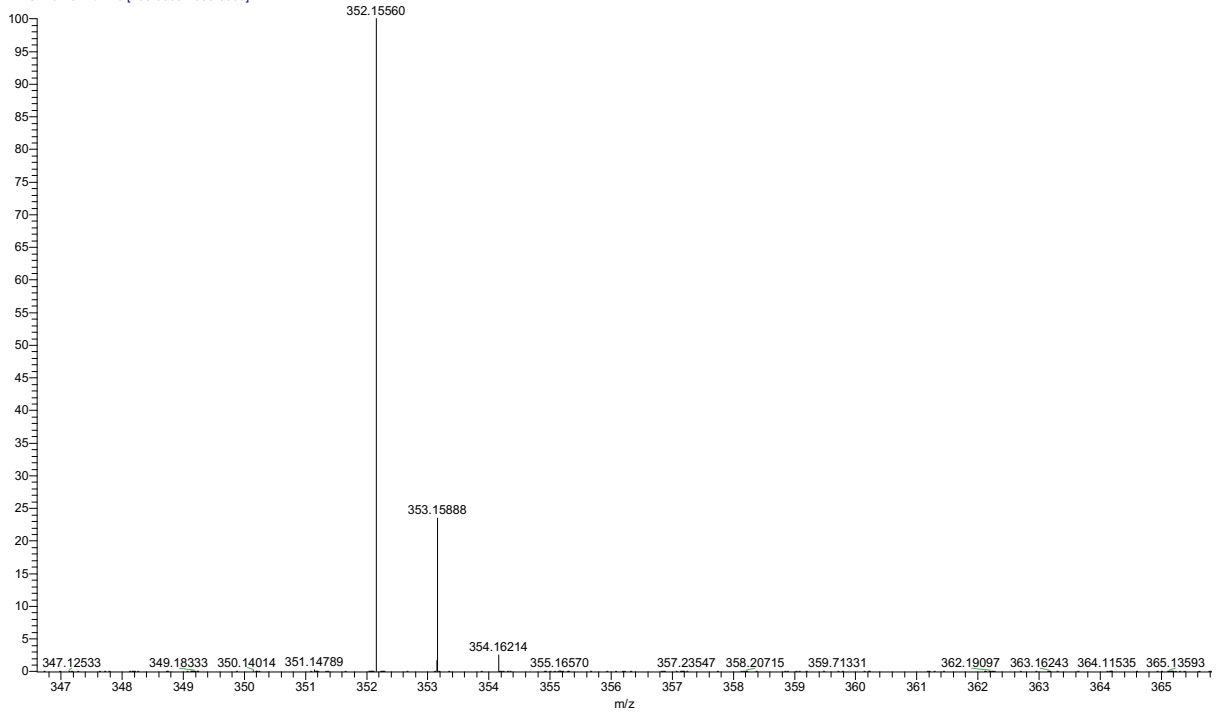

12-(pyridin-4-ylethynyl)-6,7,8,9-tetrahydro-5H-pyrimido[4',5':3,4]cycloocta[1,2-b]indol-2-amine (6).

<sup>1</sup>H NMR

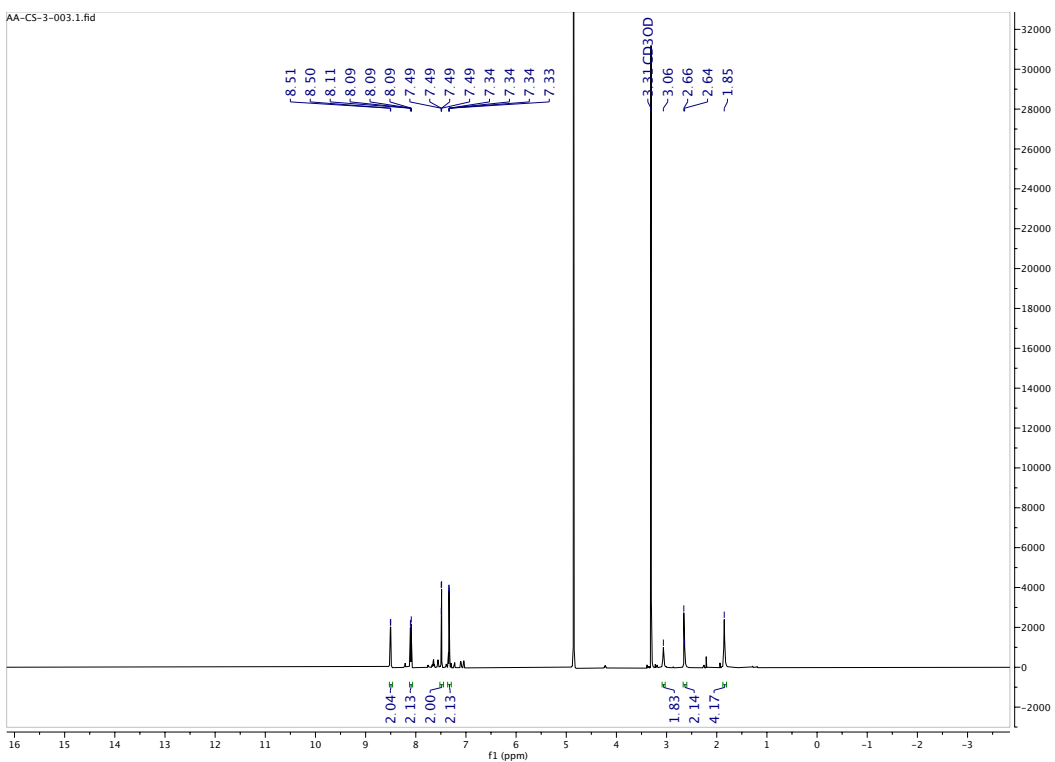

<sup>13</sup>C NMR

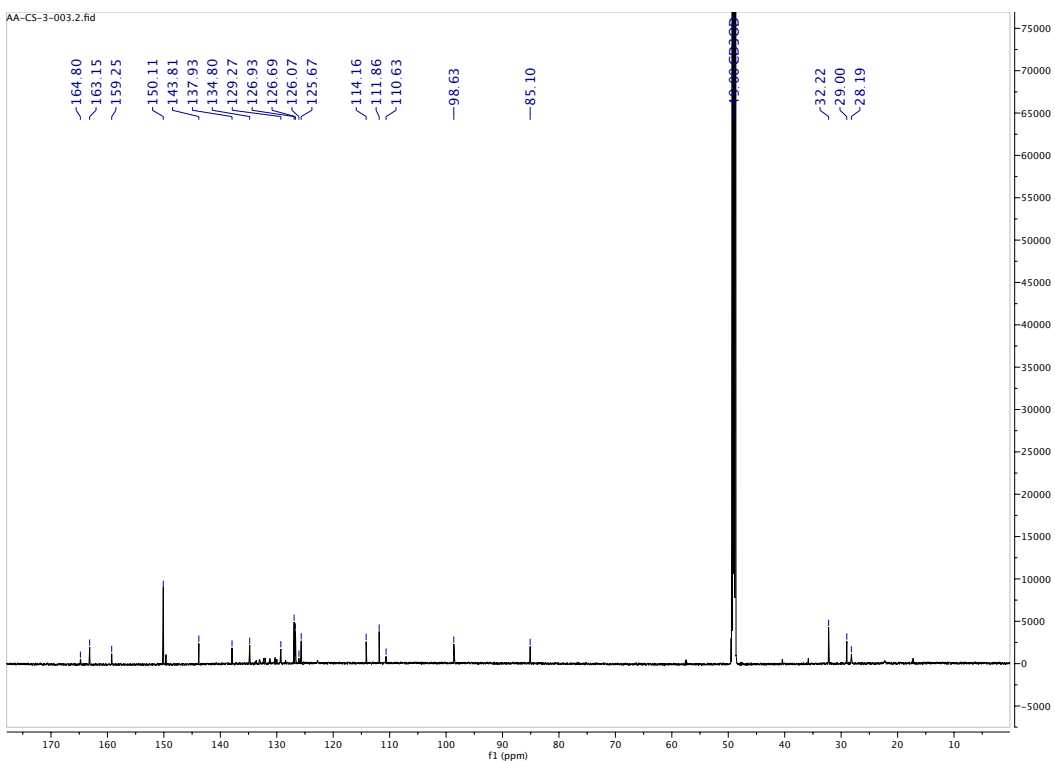



# LC Chromatogram

MaxPeak: 97.95%  
Ret\_Time: 0.929 min

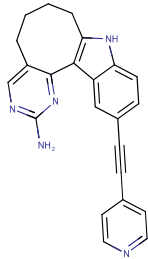

Mol Wt 365.43  
Exact Mass 365.19

| # | Time  | Area% |
|---|-------|-------|
| 1 | 0.929 | 97.95 |
| 2 | 1.041 | 2.05  |

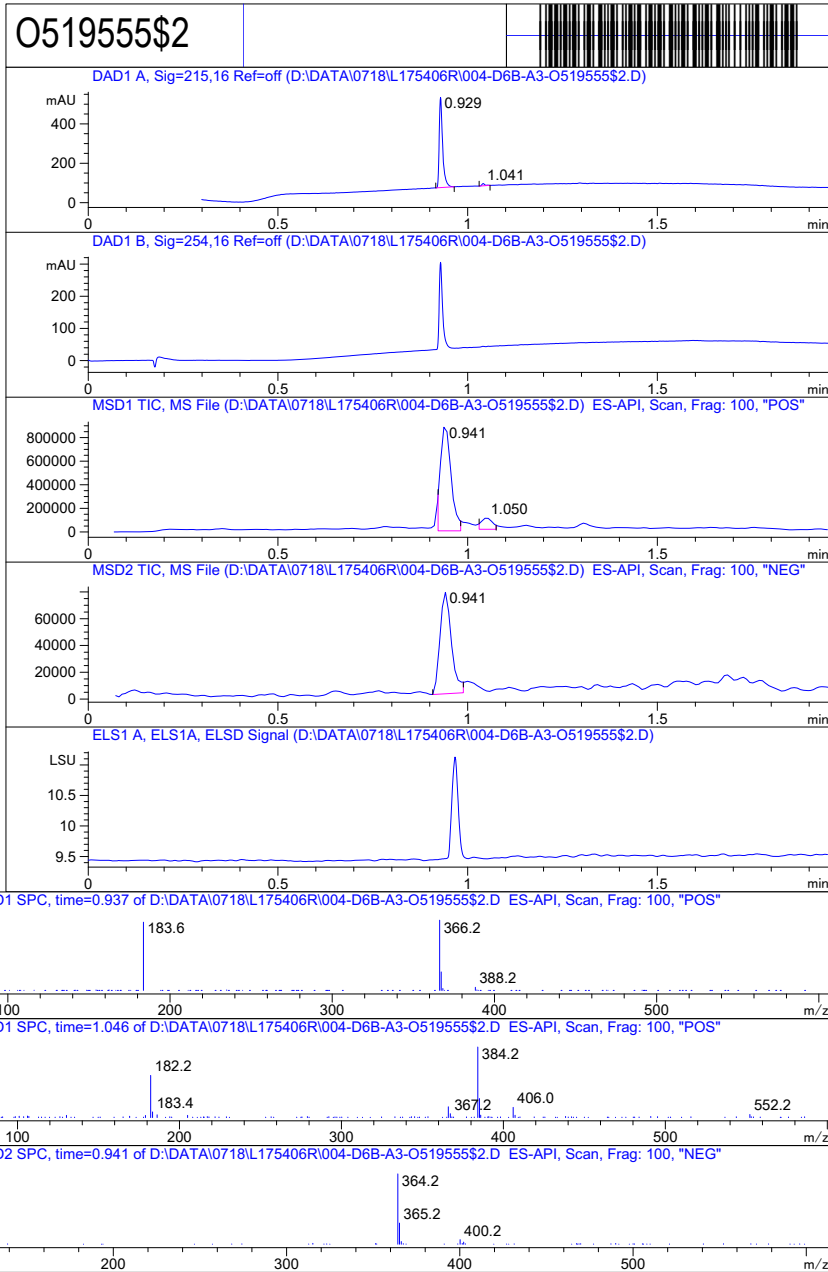

Inj.Date 7/18/2019

LT <invalid> 13

Acq. Method C:\Chem32\ -> ->

Target Compound Screening Report

|                                 |                                        |                               |                                                     |
|---------------------------------|----------------------------------------|-------------------------------|-----------------------------------------------------|
| <b>Data File</b>                | H1785733a.d                            | <b>Sample Name</b>            | H1785733                                            |
| <b>Sample Type</b>              | Sample                                 | <b>Position</b>               | P1-F2                                               |
| <b>Instrument Name</b>          | Instrument 1                           | <b>User Name</b>              | Denis V.Bylina                                      |
| <b>Acq Method</b>               | Fast_Gradient_HRMS_pos_Lock_08272019.m | <b>Acquired Time</b>          | 5/10/2021 11:50:40 AM (UTC+03:00)                   |
| <b>IRM Calibration Status</b>   | Success                                | <b>DA Method</b>              | Fast_Gradient_HRMS_pos_Lock_08272019.m              |
| <b>Comment</b>                  |                                        |                               |                                                     |
| <b>Sample Group</b>             |                                        | <b>Info.</b>                  |                                                     |
| <b>MFC</b>                      | C23H19N5                               | <b>Stream Name</b>            | LC 1                                                |
| <b>Acquisition Time (Local)</b> | 5/10/2021 11:50:40 AM (UTC+03:00)      | <b>Acquisition SW Version</b> | 6200 series TOF/6500 series Q-TOF B.08.00 (B8058.0) |
| <b>TOF Driver Version</b>       | 8.00.00                                | <b>TOF Firmware Version</b>   | 8.643                                               |
| <b>Tune Mass Range Max.</b>     | 1700                                   |                               |                                                     |

Compound Table

| Label                    | Tgt Score | Mass Error (ppm) | Tgt Formula | Obs. RT | Ref. Mass | Obs. Mass |
|--------------------------|-----------|------------------|-------------|---------|-----------|-----------|
| Cpd 1: C23 H19 N5; 2.077 | 97.71     | -0.54            | C23 H19 N5  | 2.077   | 365.164   | 365.1638  |

| Obs. m/z | Obs. RT | Obs. Mass | Tgt Formula | Tgt Mass | Tgt Mass Error (ppm) | RT Diff.        | Find Cpds Algorithm |
|----------|---------|-----------|-------------|----------|----------------------|-----------------|---------------------|
| 366.1711 | 2.077   | 365.1638  | C23 H19 N5  | 365.164  | -0.54                | Find By Formula |                     |

Compound Chromatograms

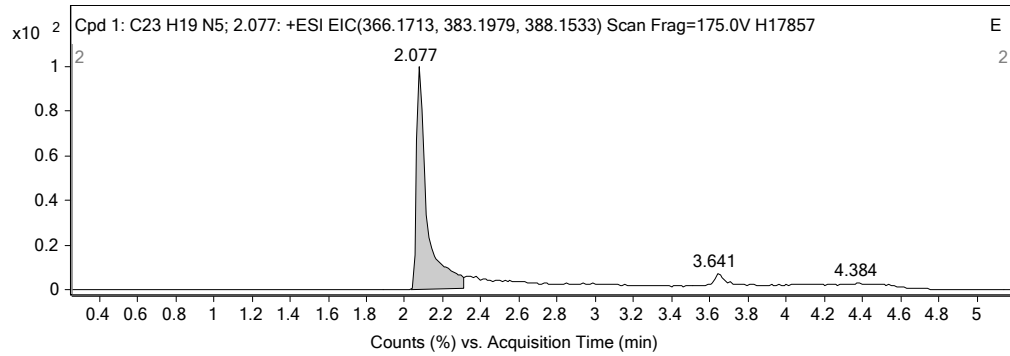

MS Zoomed Spectrum

*1-(2-amino-6,7-dihydro-5H-pyrimido[5,4-c]carbazol-10-yl)-4-methylpent-1-yn-3-ol (10).*  
<sup>1</sup>H NMR

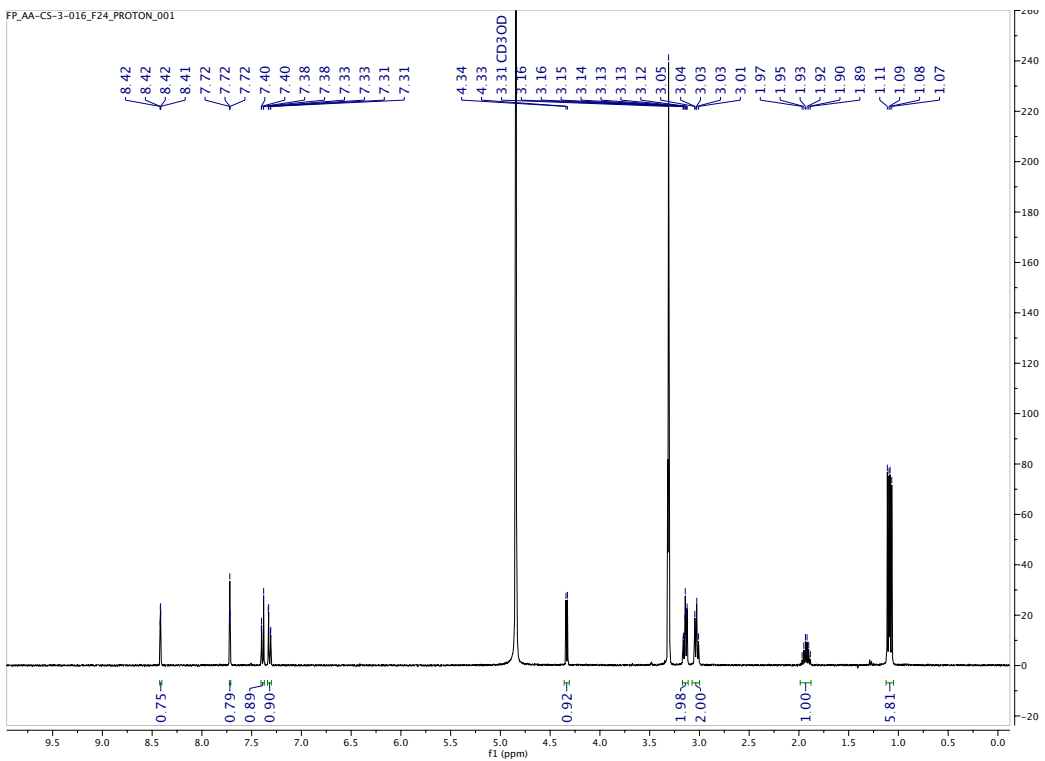

<sup>13</sup>C NMR

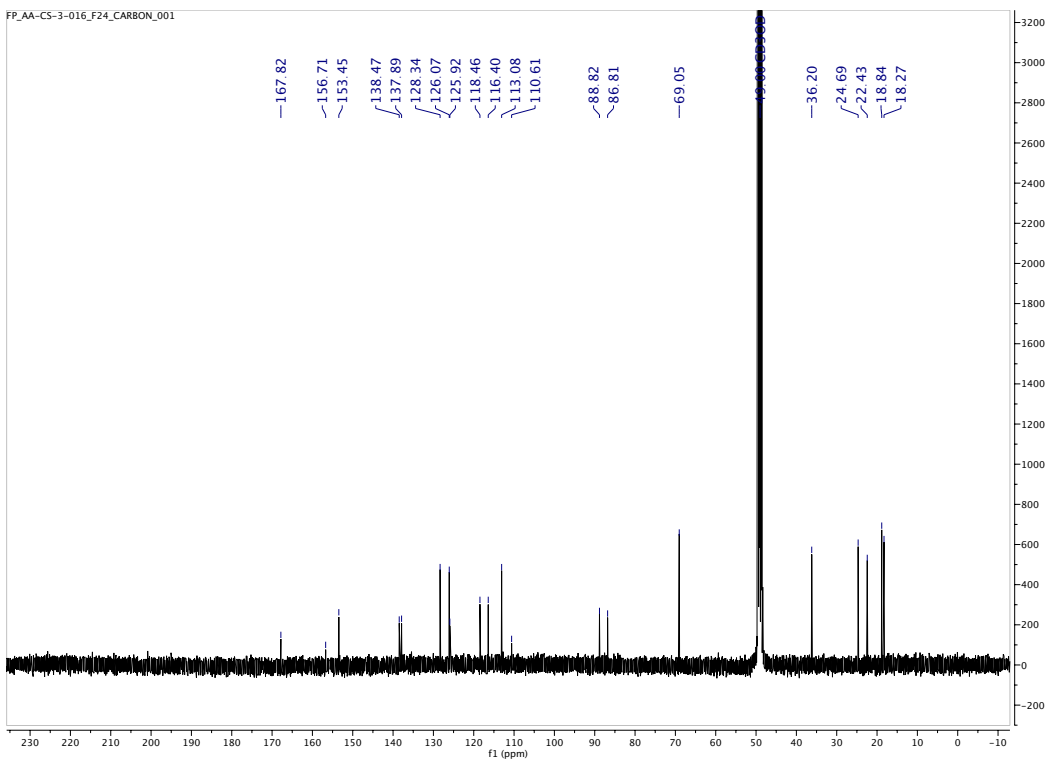

# LC Chromatogram

MaxPeak: 95.34%  
Ret\_Time: 1.047 min

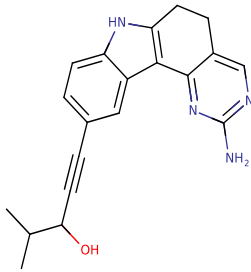

Mol Wt 332.4  
Exact Mass 332.19

| # | Time  | Area% |
|---|-------|-------|
| 1 | 1.020 | 3.34  |
| 2 | 1.047 | 95.34 |
| 3 | 1.164 | 1.33  |

O614079\$1

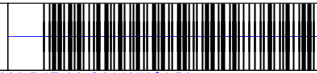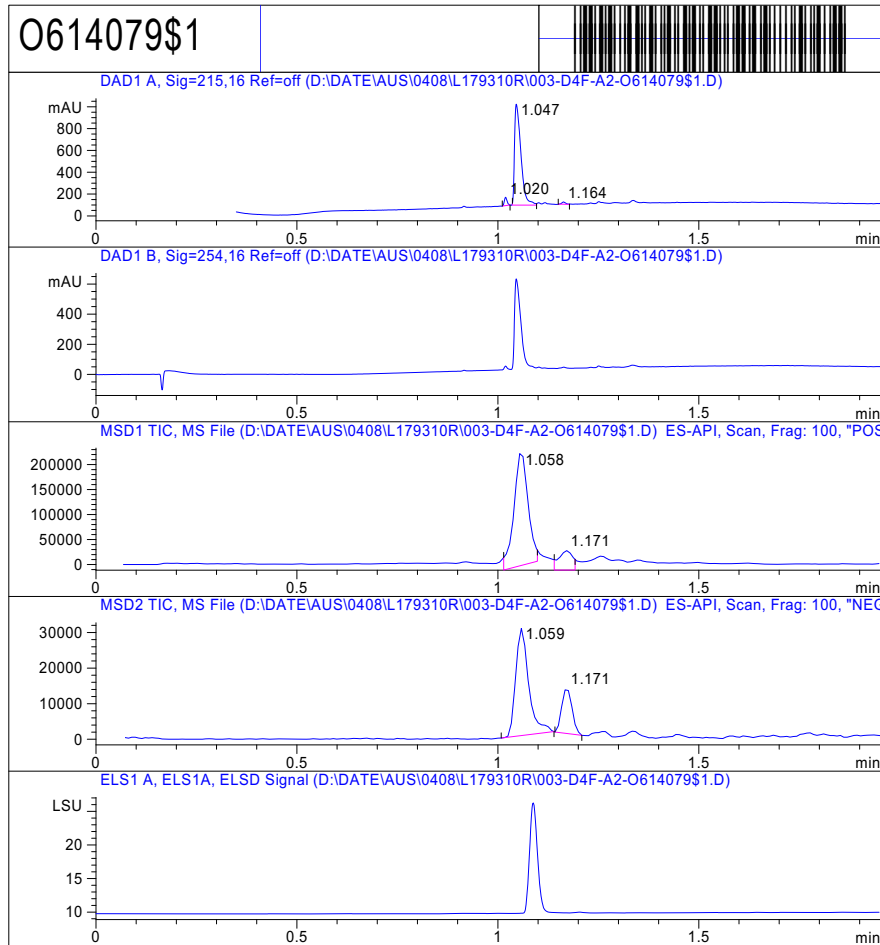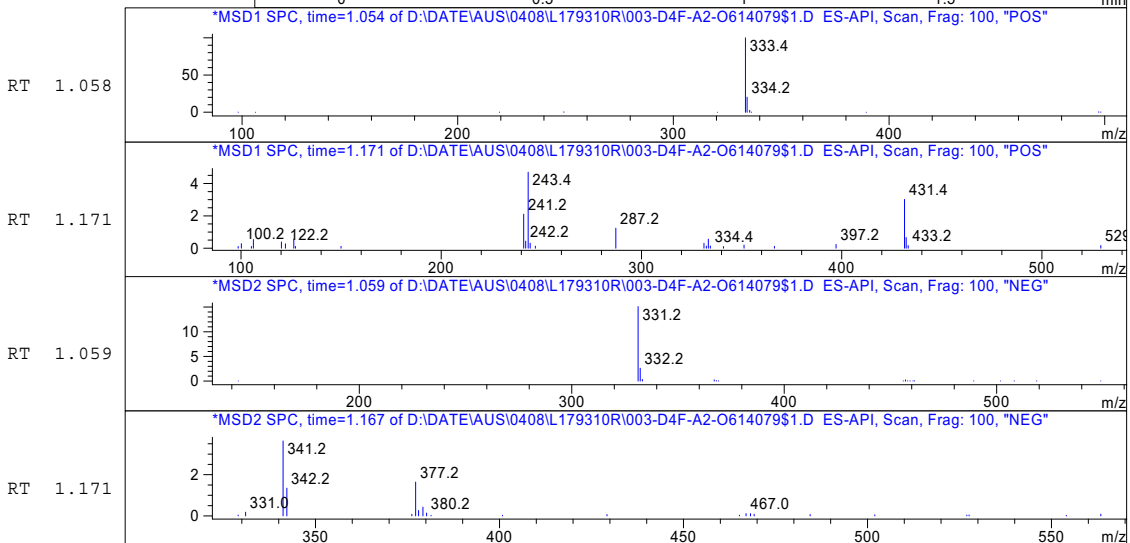

Inj.Date 8/4/2019

Y

<invalid> -14-

Acq. Method C:\Chem32\--> -->

Target Compound Screening Report

|                                 |                                        |                               |                                                     |
|---------------------------------|----------------------------------------|-------------------------------|-----------------------------------------------------|
| <b>Data File</b>                | H1806657.d                             | <b>Sample Name</b>            | H1806657                                            |
| <b>Sample Type</b>              | Sample                                 | <b>Position</b>               | P1-D5                                               |
| <b>Instrument Name</b>          | Instrument 1                           | <b>User Name</b>              | Denis V.Bylina                                      |
| <b>Acq Method</b>               | Fast_Gradient_HRMS_pos_Lock_08272019.m | <b>Acquired Time</b>          | 5/7/2021 8:09:18 PM (UTC+03:00)                     |
| <b>IRM Calibration Status</b>   | Success                                | <b>DA Method</b>              | Fast_Gradient_HRMS_pos_Lock_08272019.m              |
| <b>Comment</b>                  |                                        |                               |                                                     |
| <b>Sample Group</b>             |                                        | <b>Info.</b>                  |                                                     |
| <b>MFC</b>                      | C20H20N4O                              | <b>Stream Name</b>            | LC 1                                                |
| <b>Acquisition Time (Local)</b> | 5/7/2021 8:09:18 PM (UTC+03:00)        | <b>Acquisition SW Version</b> | 6200 series TOF/6500 series Q-TOF B.08.00 (B8058.0) |
| <b>TOF Driver Version</b>       | 8.00.00                                | <b>TOF Firmware Version</b>   | 8.643                                               |
| <b>Tune Mass Range Max.</b>     | 1700                                   |                               |                                                     |

Compound Table

| Label                      | Tgt Score | Mass Error (ppm) | Tgt Formula  | Obs. RT | Ref. Mass | Obs. Mass |
|----------------------------|-----------|------------------|--------------|---------|-----------|-----------|
| Cpd 2: C20 H20 N4 O; 2.259 | 80.03     | -0.57            | C20 H20 N4 O | 2.259   | 332.1637  | 332.1635  |
| Cpd 1: C20 H20 N4 O; 2.323 | 71.87     | 0.52             | C20 H20 N4 O | 2.323   | 332.1637  | 332.1639  |

| Obs. m/z | Obs. RT | Obs. Mass | Tgt Formula  | Tgt Mass | Tgt Mass Error (ppm) | RT Diff.        | Find Cpds Algorithm |
|----------|---------|-----------|--------------|----------|----------------------|-----------------|---------------------|
| 333.1703 | 2.259   | 332.1635  | C20 H20 N4 O | 332.1637 | -0.57                | Find By Formula |                     |

Compound Chromatograms

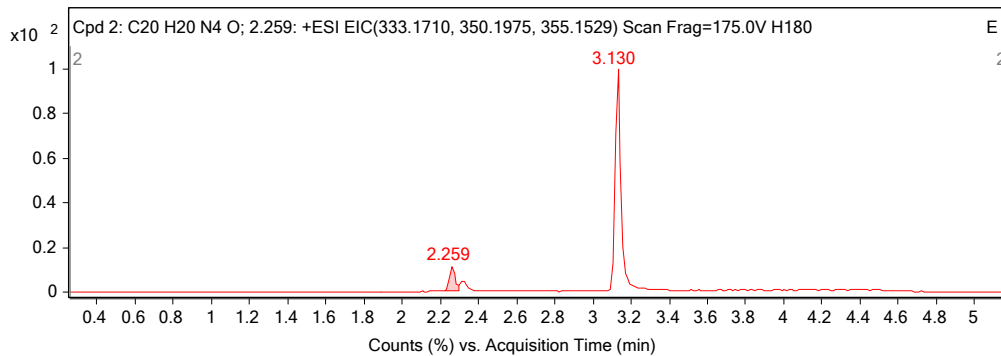

MS Zoomed Spectrum

*1-(2-amino-5,6,7,8-tetrahydropyrimido[4',5':3,4]cyclohepta[1,2-b]indol-11-yl)-4-methylpent-1-yn-3-ol (11).*

**<sup>1</sup>H NMR**

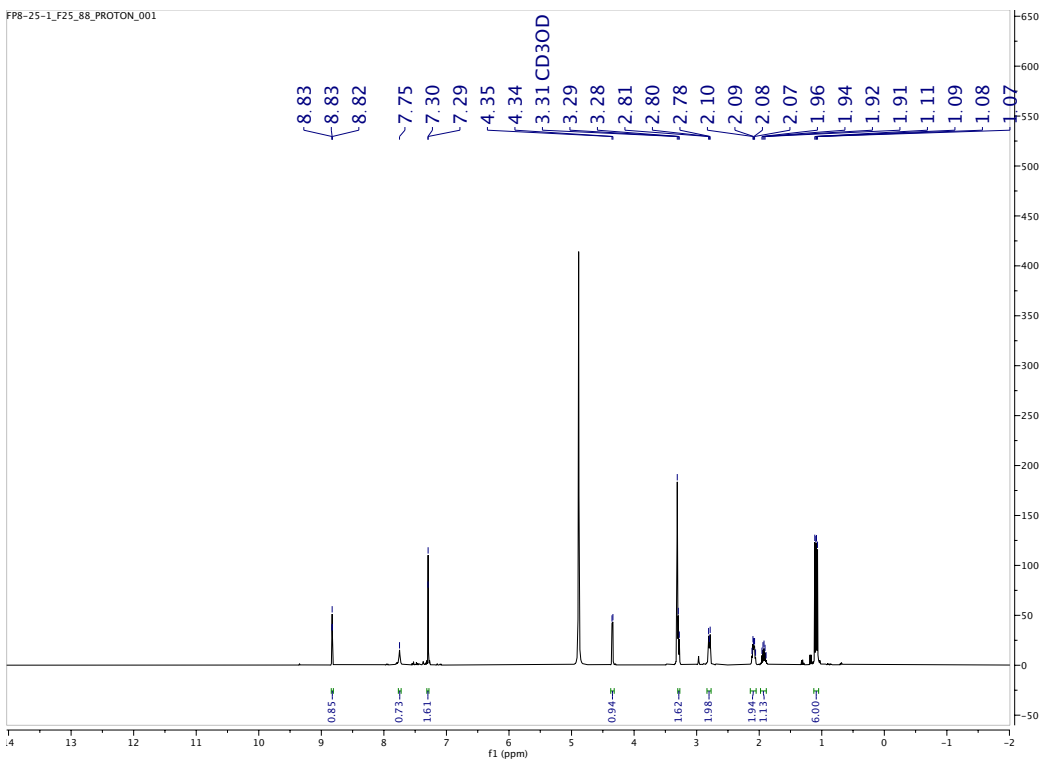

**<sup>13</sup>C NMR**

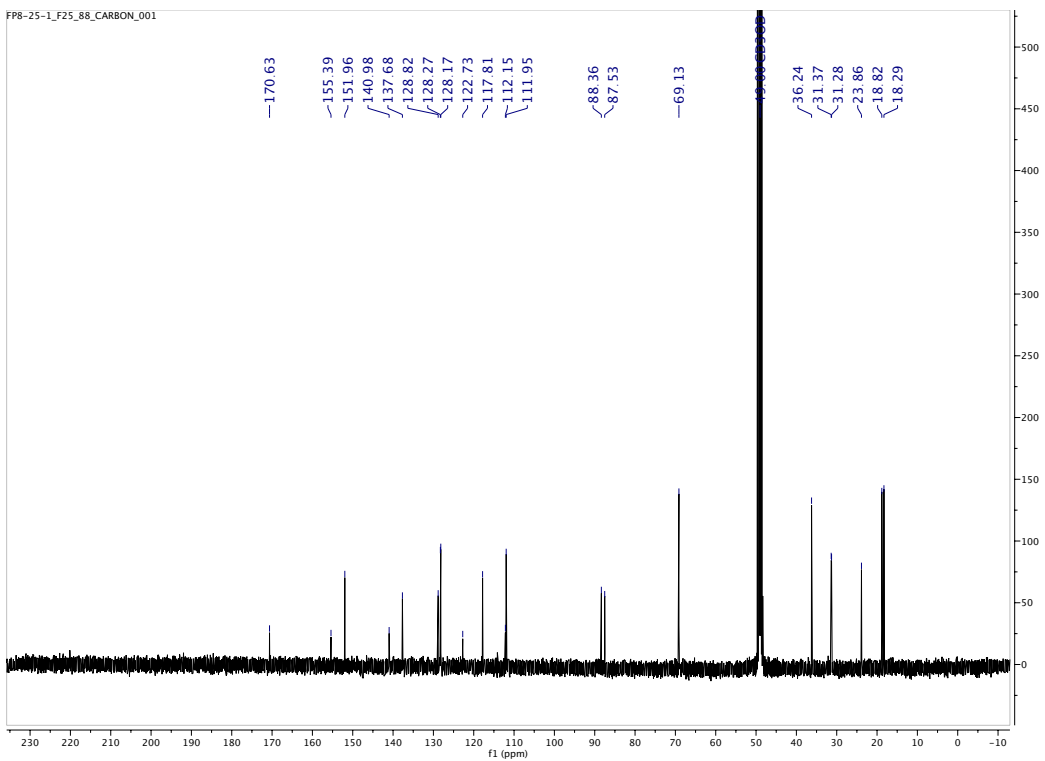

# LC Chromatogram

MaxPeak: 95.56%  
Ret\_Time: 0.998 min

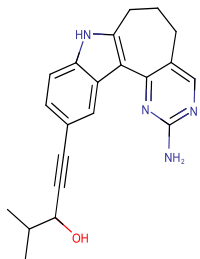

Mol Wt 346.43

Exact Mass 346.21

| # | Time  | Area% |
|---|-------|-------|
| 1 | 0.998 | 95.56 |
| 2 | 1.071 | 1.72  |
| 3 | 1.262 | 2.72  |

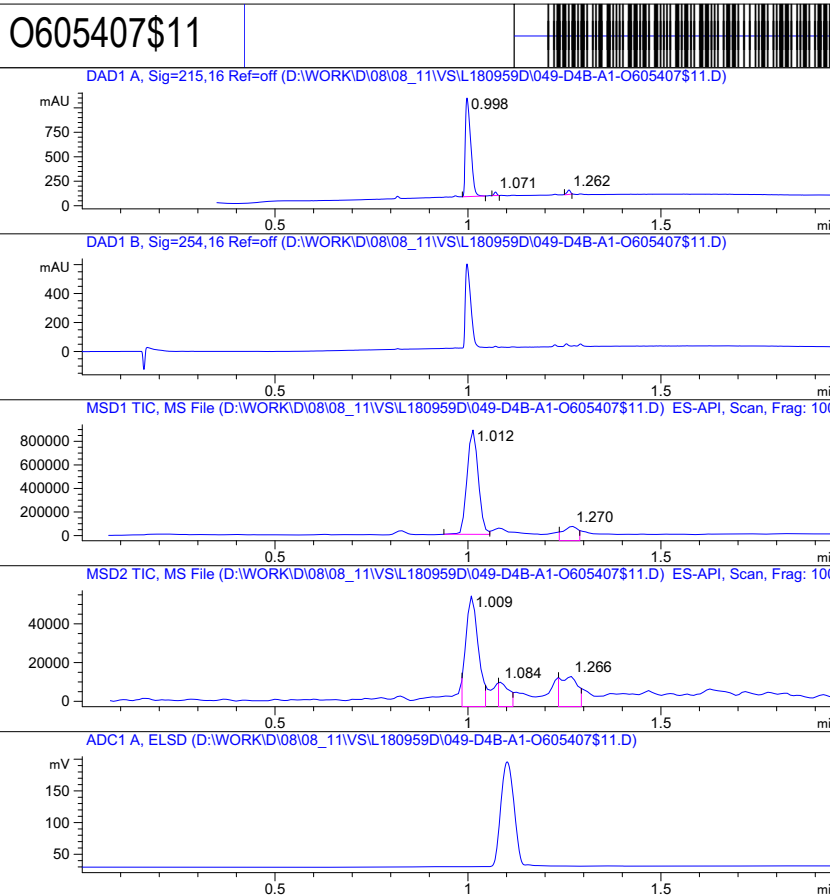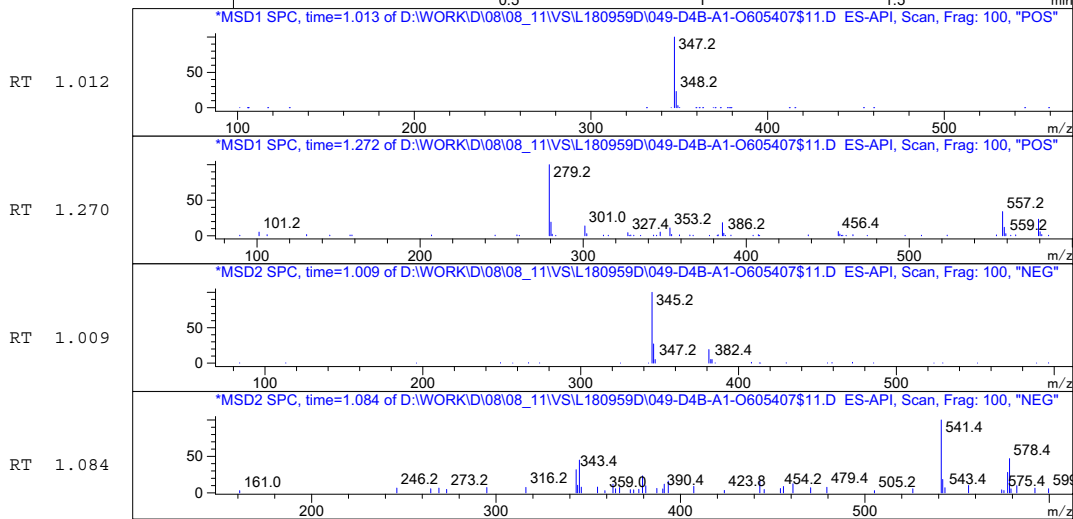

Inj.Date 8/11/2019

K <invalid> -9-

Acq. Method C:\Chem32\ -> ->

# HRMS

FP-25-1 #5-100 RT: 0.02-0.43 AV: 96 NL: 9.88E8  
T: FTMS + p ESI Full ms [150.0000-2000.0000]

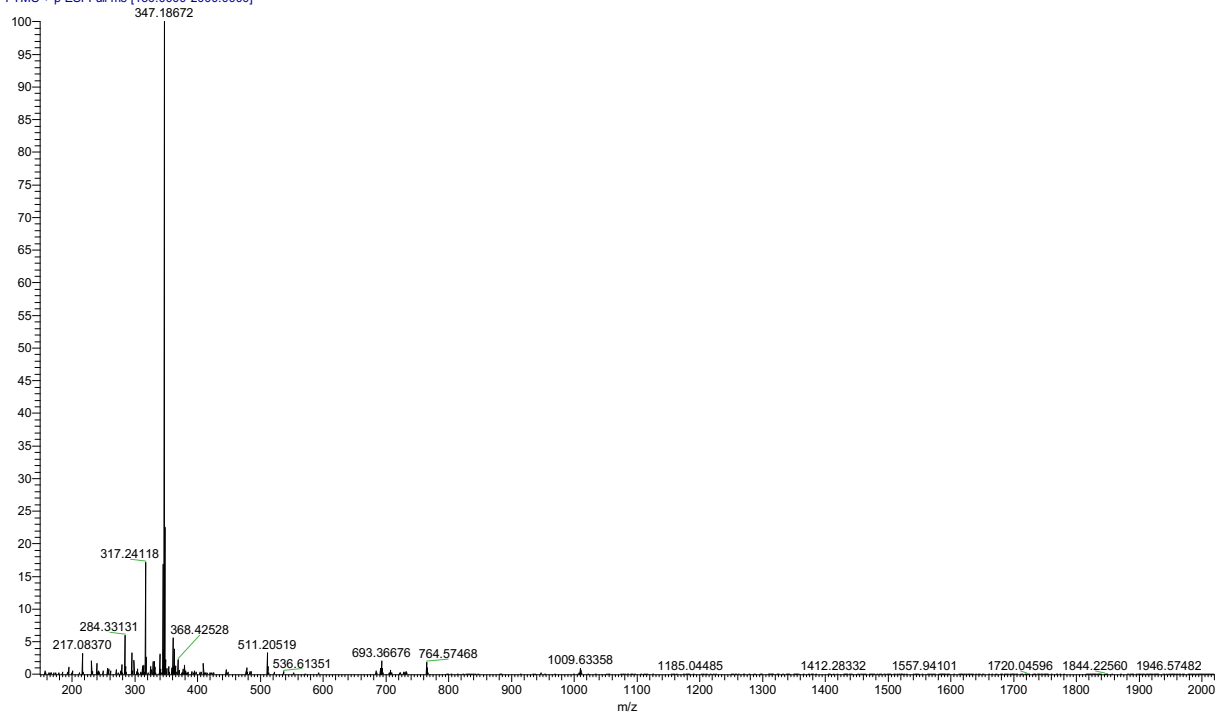

FP-25-1 #5-100 RT: 0.02-0.43 AV: 96 NL: 9.88E8  
T: FTMS + p ESI Full ms [150.0000-2000.0000]

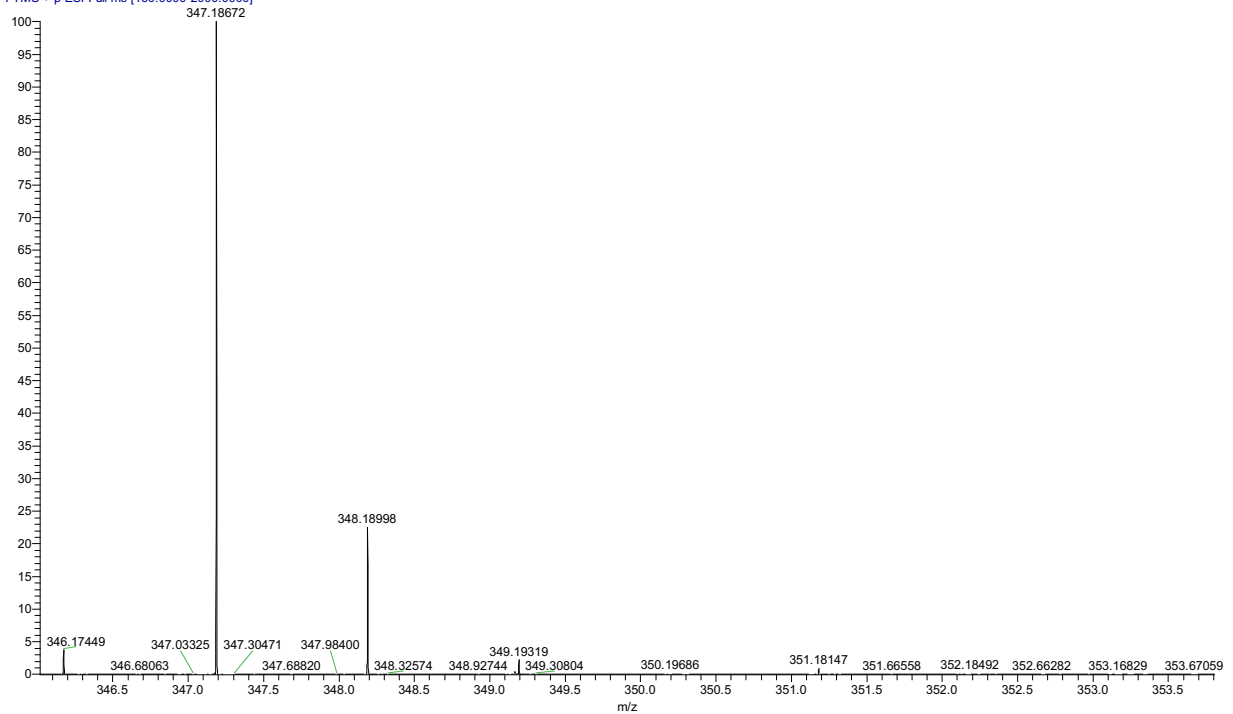



10-((1-methyl-1H-imidazol-5-yl)ethynyl)-6,7-dihydro-5H-pyrimido[5,4-c]carbazol-2-amine (**14**).  
<sup>1</sup>H NMR

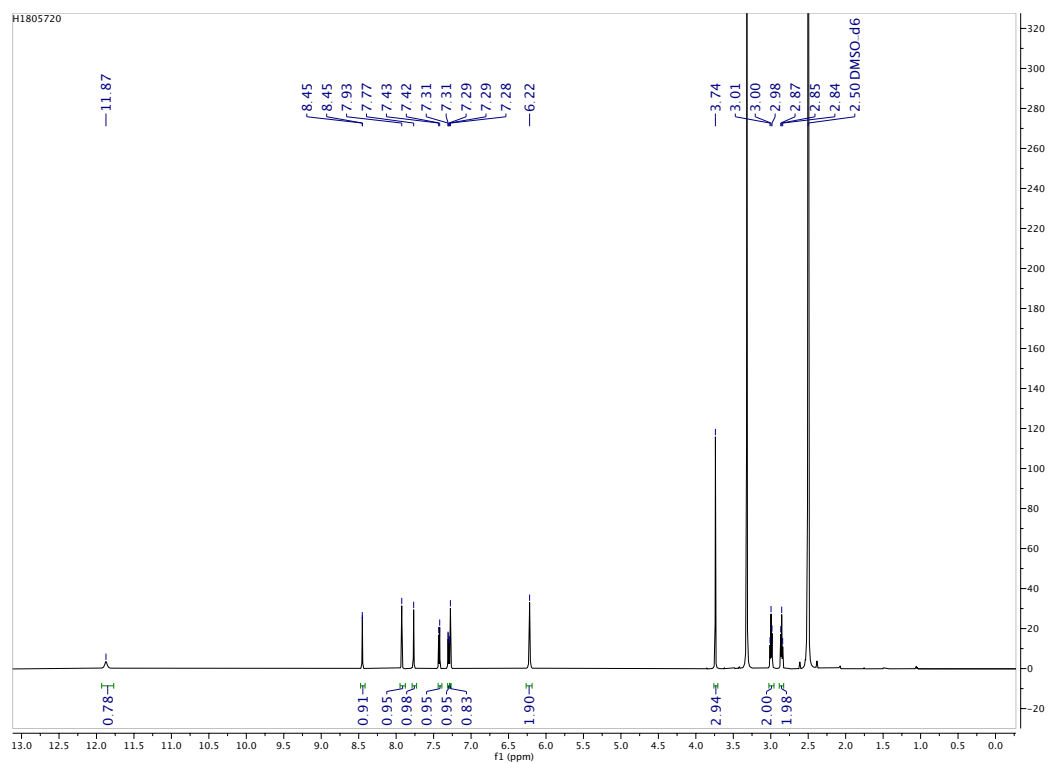

<sup>13</sup>C NMR

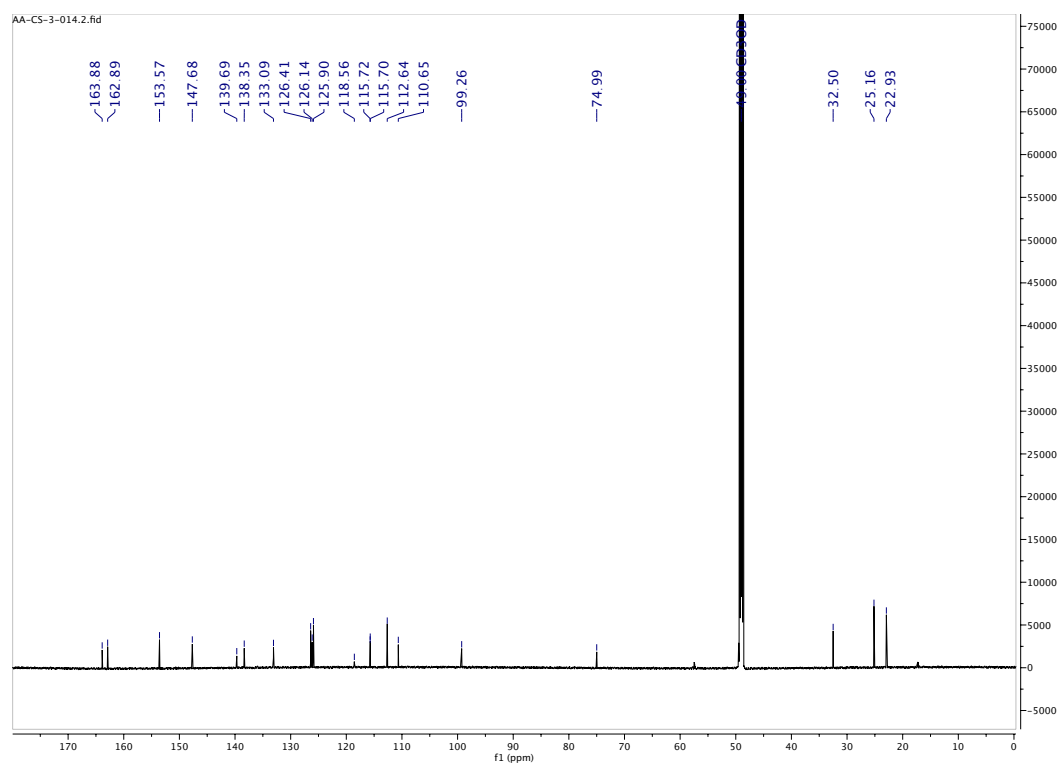

# LC Chromatogram

MaxPeak: 98.86%  
Ret\_Time: 0.810 min

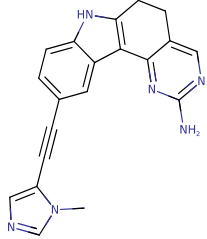

Mol Wt 340.38  
Exact Mass 340.16

| # | Time  | Area% |
|---|-------|-------|
| 1 | 0.810 | 98.86 |
| 2 | 1.021 | 1.14  |

O604497\$1

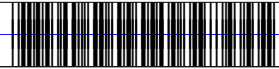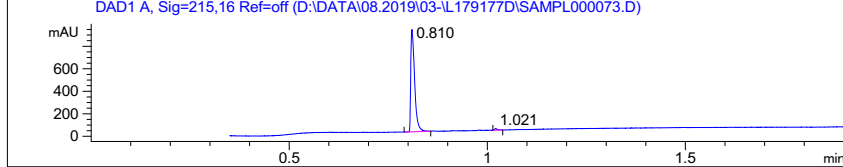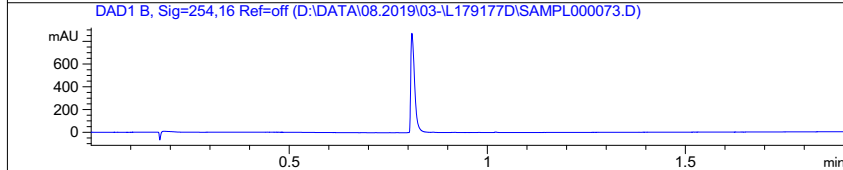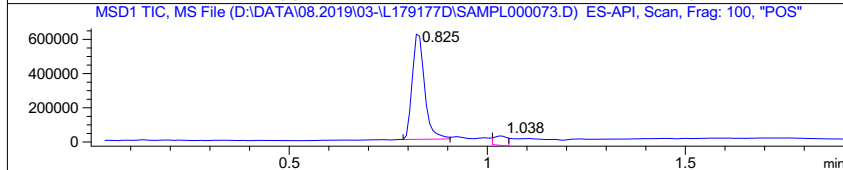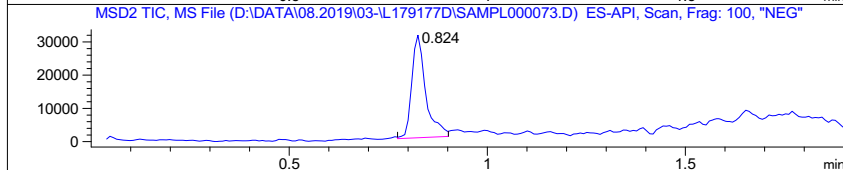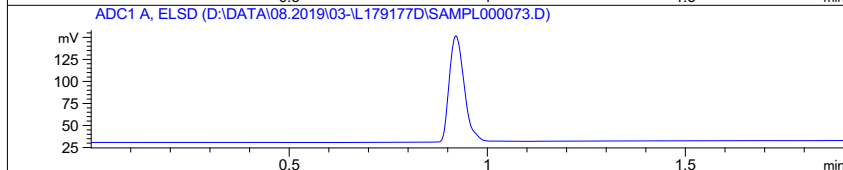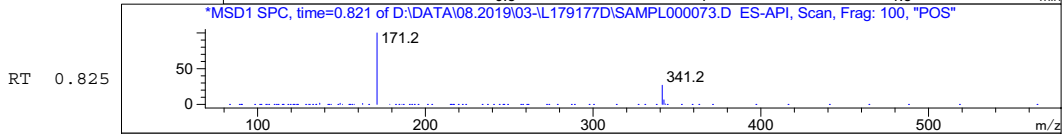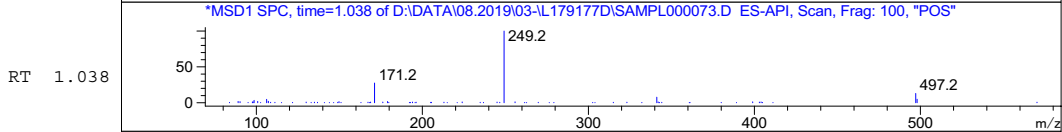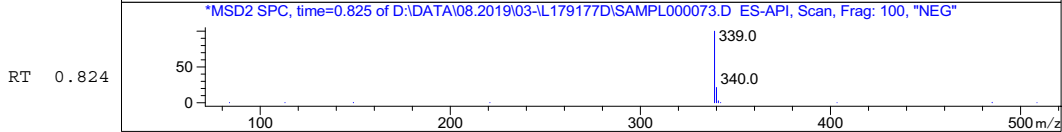

Inj.Date 8/3/2019

CH

P1-A-01

-5-

Acq. Method C:\CHEM32\ -> ->

Target Compound Screening Report

|                                 |                                        |                               |                                                     |
|---------------------------------|----------------------------------------|-------------------------------|-----------------------------------------------------|
| <b>Data File</b>                | H1805720.d                             | <b>Sample Name</b>            | H1805720                                            |
| <b>Sample Type</b>              | Sample                                 | <b>Position</b>               | P1-B6                                               |
| <b>Instrument Name</b>          | Instrument 1                           | <b>User Name</b>              | Denis V.Bylina                                      |
| <b>Acq Method</b>               | Fast_Gradient_HRMS_pos_Lock_08272019.m | <b>Acquired Time</b>          | 5/7/2021 7:14:44 PM (UTC+03:00)                     |
| <b>IRM Calibration Status</b>   | Success                                | <b>DA Method</b>              | Fast_Gradient_HRMS_pos_Lock_08272019.m              |
| <b>Comment</b>                  |                                        |                               |                                                     |
| <b>Sample Group</b>             |                                        | <b>Info.</b>                  |                                                     |
| <b>MFC</b>                      | C20H16N6                               | <b>Stream Name</b>            | LC 1                                                |
| <b>Acquisition Time (Local)</b> | 5/7/2021 7:14:44 PM (UTC+03:00)        | <b>Acquisition SW Version</b> | 6200 series TOF/6500 series Q-TOF B.08.00 (B8058.0) |
| <b>TOF Driver Version</b>       | 8.00.00                                | <b>TOF Firmware Version</b>   | 8.643                                               |
| <b>Tune Mass Range Max.</b>     | 1700                                   |                               |                                                     |

Compound Table

| Label                    | Tgt Score | Mass Error (ppm) | Tgt Formula | Obs. RT | Ref. Mass | Obs. Mass |
|--------------------------|-----------|------------------|-------------|---------|-----------|-----------|
| Cpd 1: C20 H16 N6; 2.944 | 54.57     | 2.51             | C20 H16 N6  | 2.944   | 340.1436  | 340.1445  |

| Obs. m/z | Obs. RT | Obs. Mass | Tgt Formula | Tgt Mass | Tgt Mass Error (ppm) | RT Diff.        | Find Cpds Algorithm |
|----------|---------|-----------|-------------|----------|----------------------|-----------------|---------------------|
| 363.1347 | 2.944   | 340.1445  | C20 H16 N6  | 340.1436 | 2.51                 | Find By Formula |                     |

Compound Chromatograms

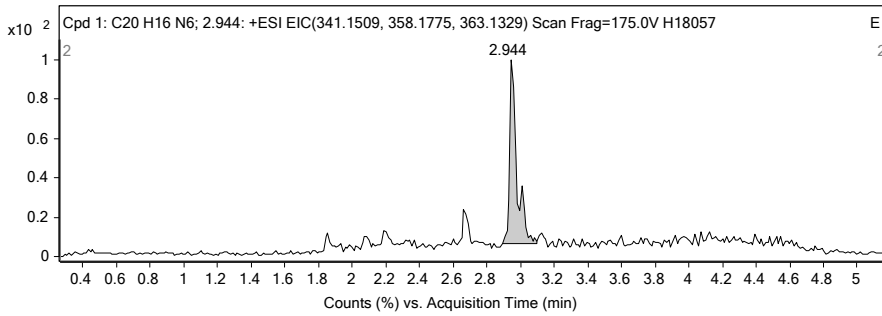

MS Zoomed Spectrum

10-(cyclopropylethynyl)-6,7-dihydro-5H-pyrimido[5,4-c]carbazol-2-amine (15).  
<sup>1</sup>H NMR

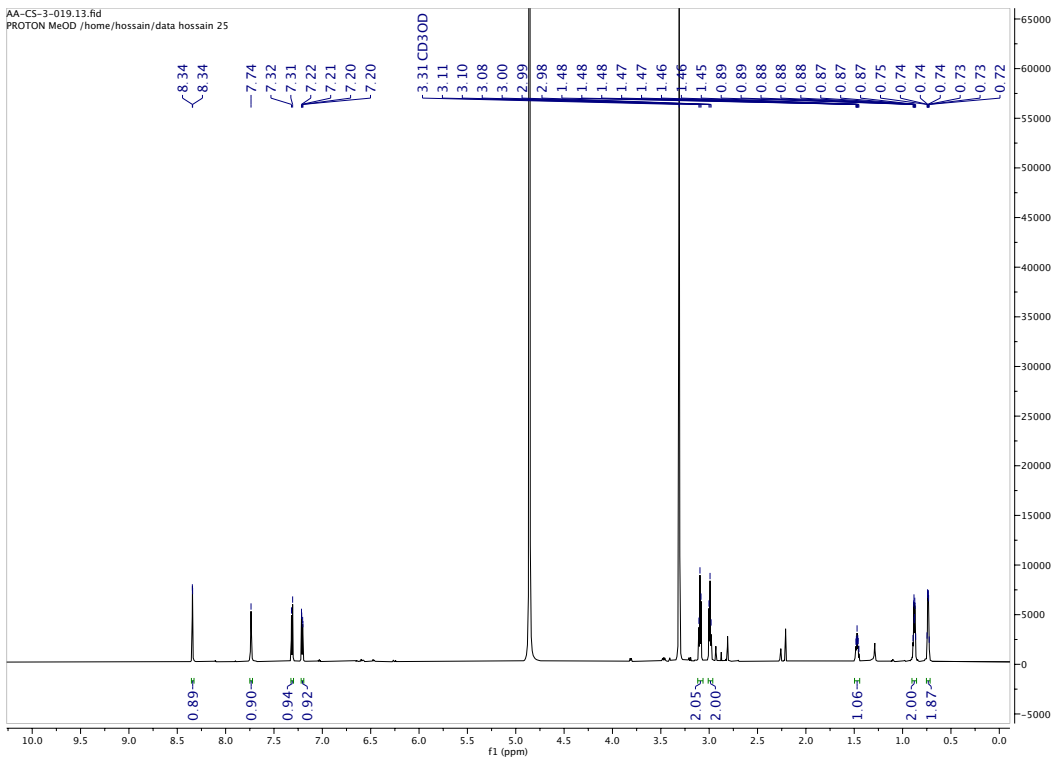

<sup>13</sup>C NMR

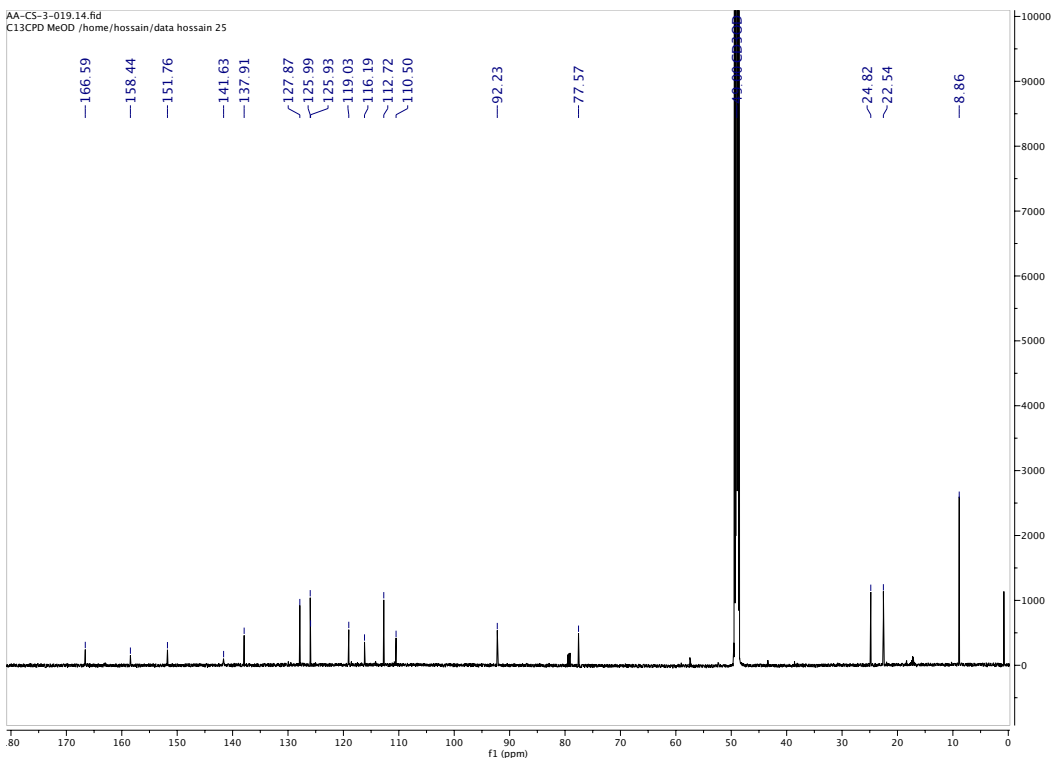

# LC Chromatogram

MaxPeak: 96.33%  
Ret\_Time: 1.007 min

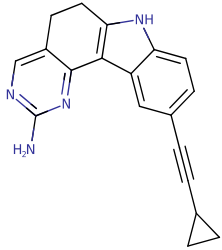

Mol Wt 300.36

Exact Mass 300.16

| # | Time  | Area% |
|---|-------|-------|
| 1 | 0.691 | 3.67  |
| 2 | 1.007 | 96.33 |

O602822\$2

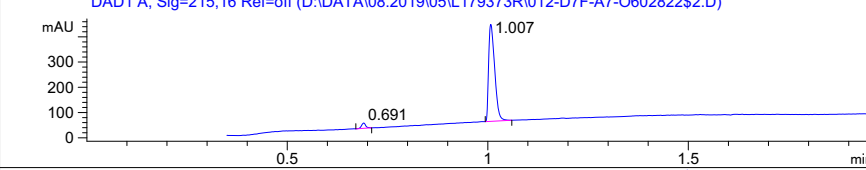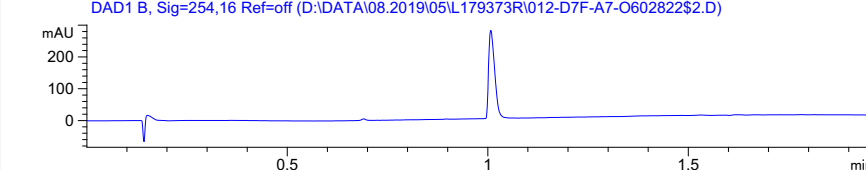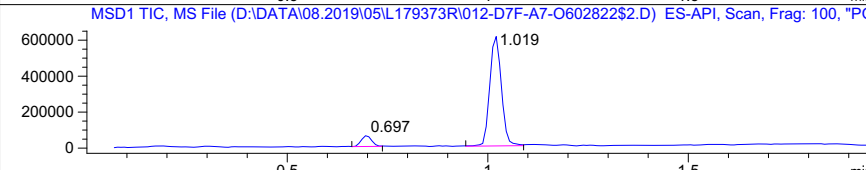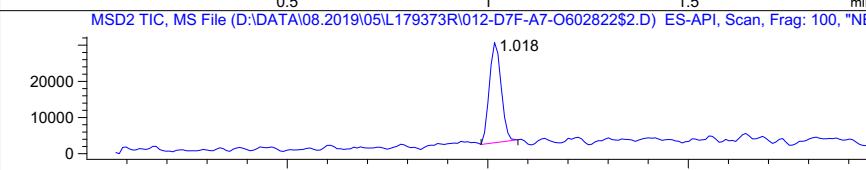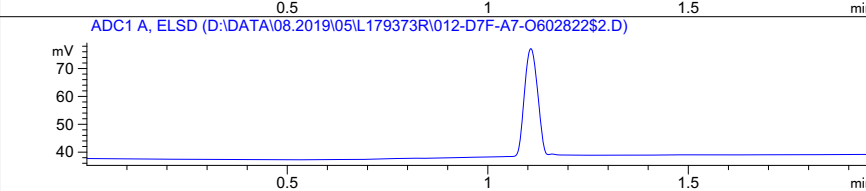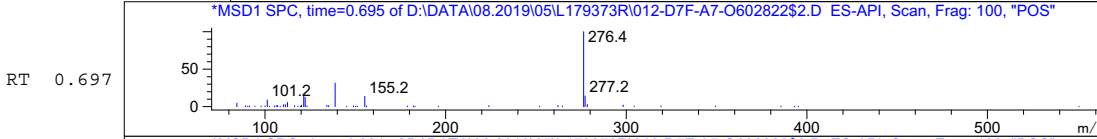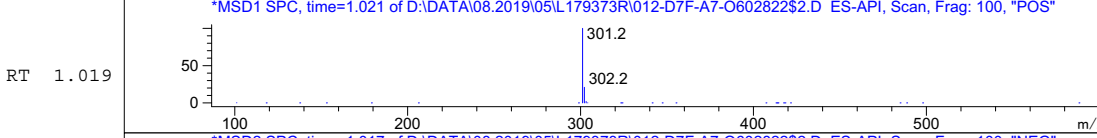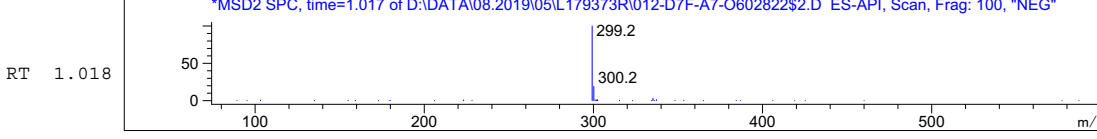

Inj.Date 8/5/2019

CH

<invalid> -9-

Acq. Method C:\Chem32\ -> ->

# HRMS

AA-3-19 #787-854 RT: 3.40-3.69 AV: 68 NL: 5.22E8  
T: FTMS + c ESI Full ms [150.0000-2000.0000]

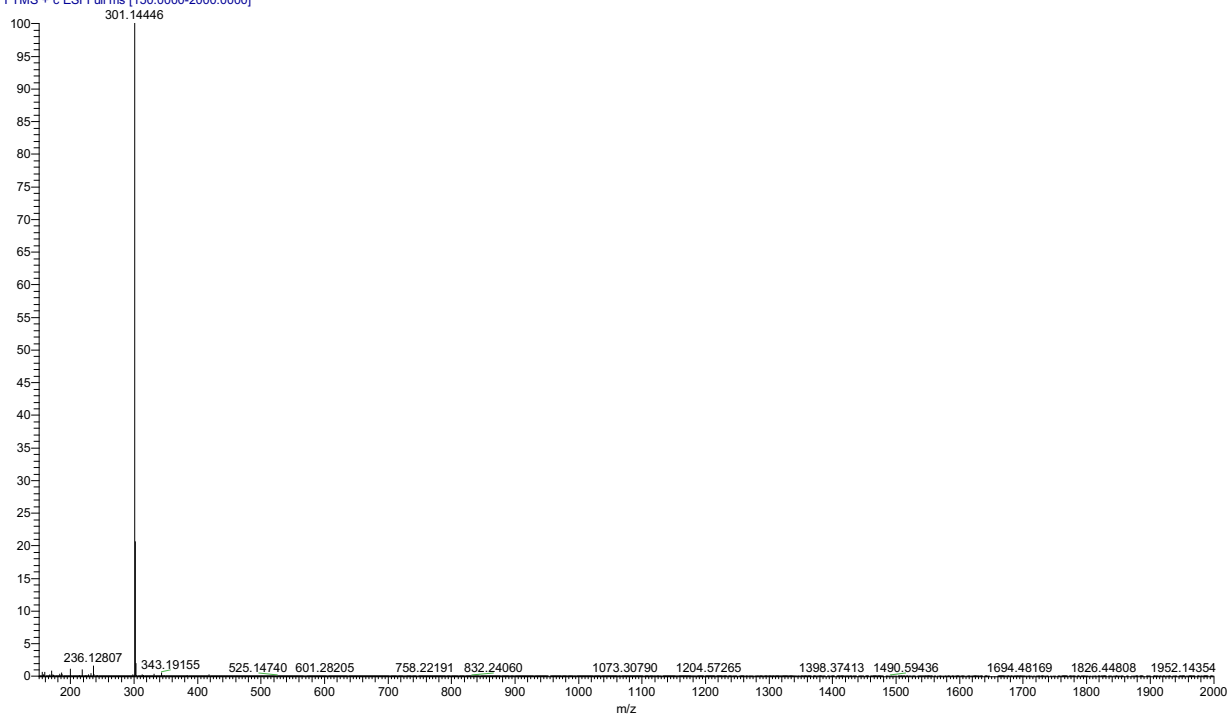

## 10-(3-(dimethylamino)prop-1-yn-1-yl)-6,7-dihydro-5H-pyrimido[5,4-c]carbazol-2-amine (16). <sup>1</sup>H NMR

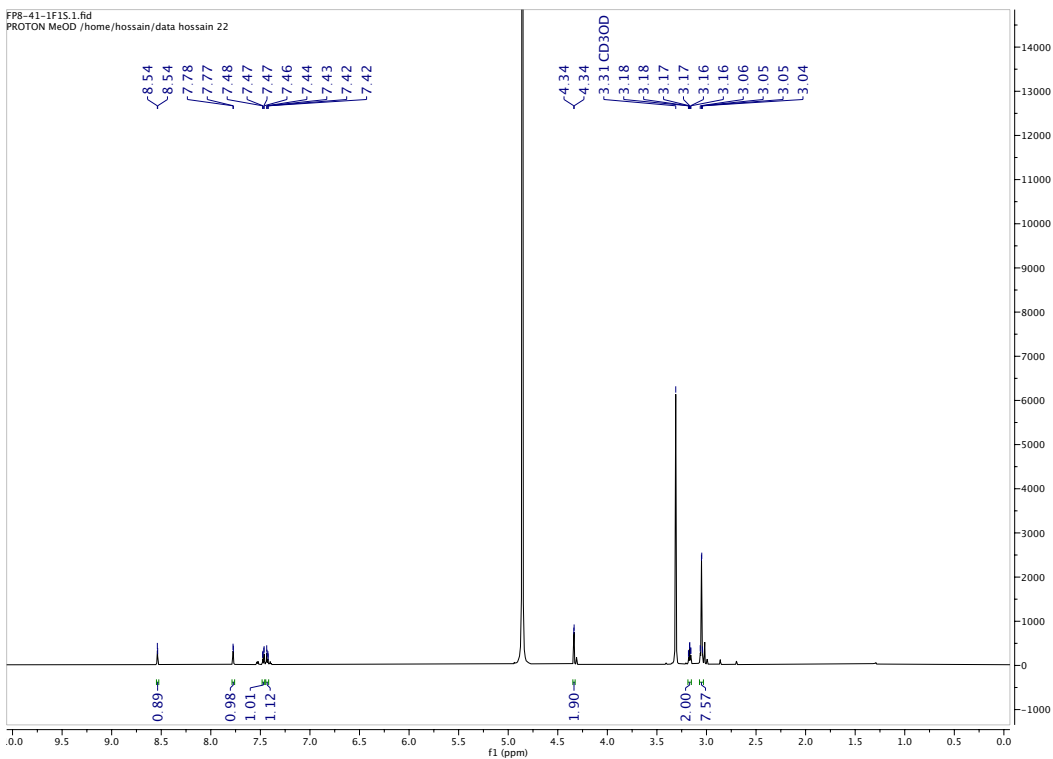

# <sup>13</sup>C NMR

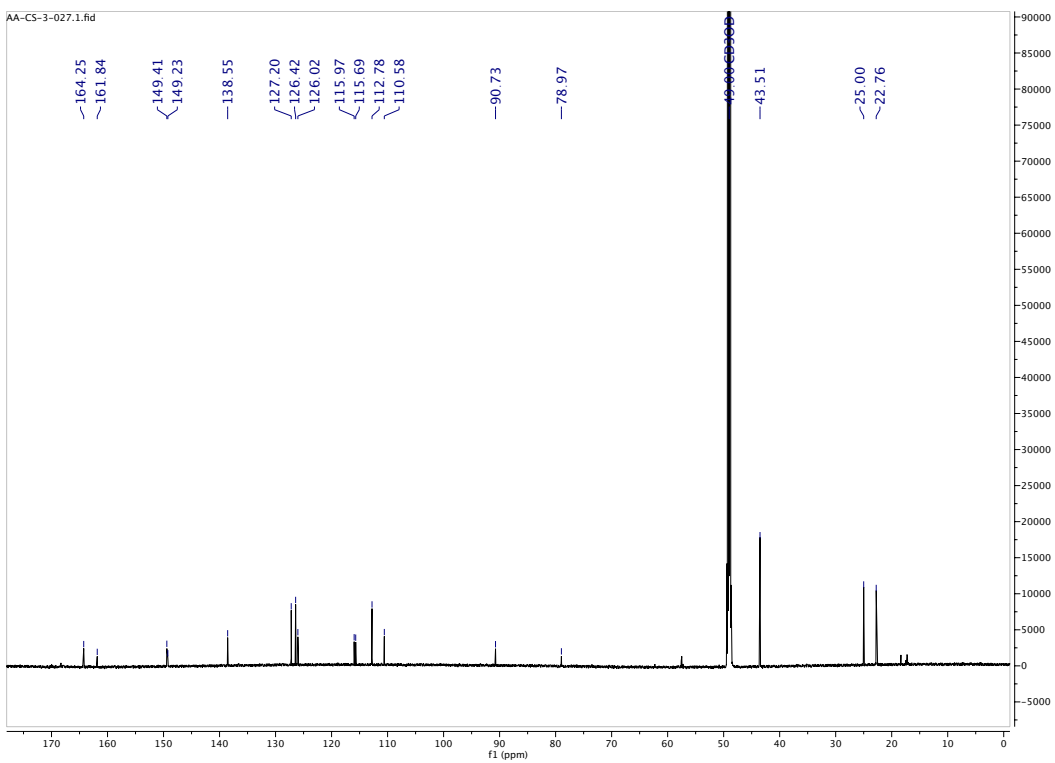

# LC Chromatogram

MaxPeak: 100.00%  
Ret\_Time: 0.689 min

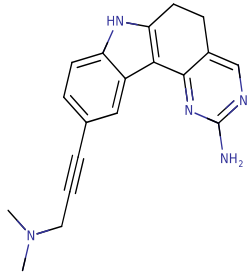

Mol Wt 317.39  
Exact Mass 317.19

| # | Time  | Area%  |
|---|-------|--------|
| 1 | 0.689 | 100.00 |

0696137\$1

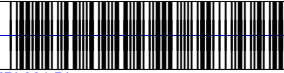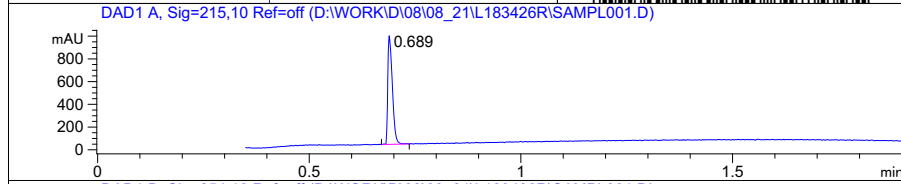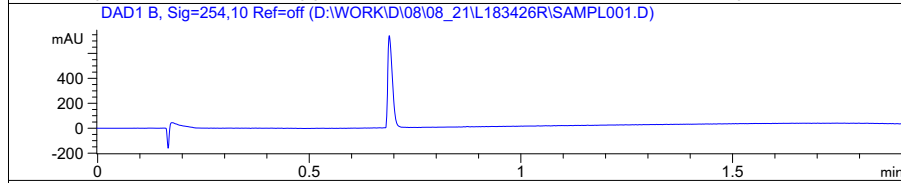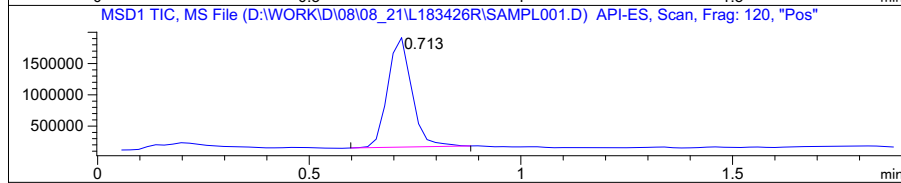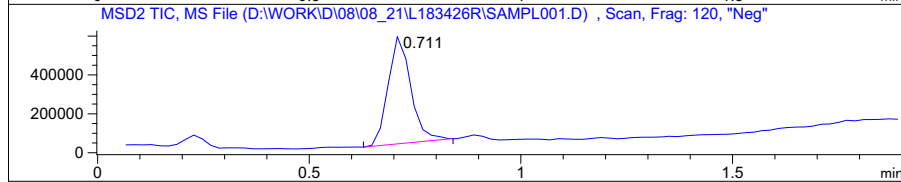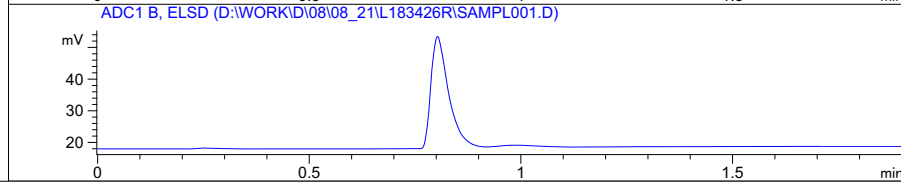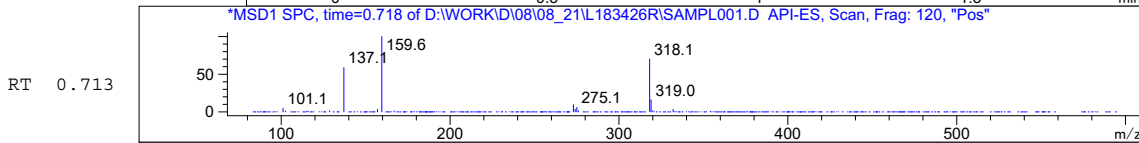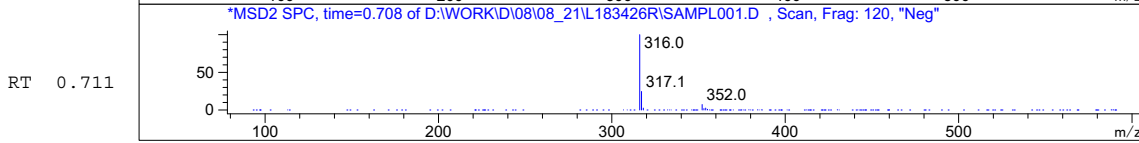

Inj.Date 8/21/2019

K P2-A-01 -SL-

Acq. Method C:\HPCHEM\ -> ->



# HRMS

AA-3-27 #501-558 RT: 2.16-2.41 AV: 58 NL: 5.09E7  
T: FTMS + c ESI Full ms [150.0000-2000.0000]

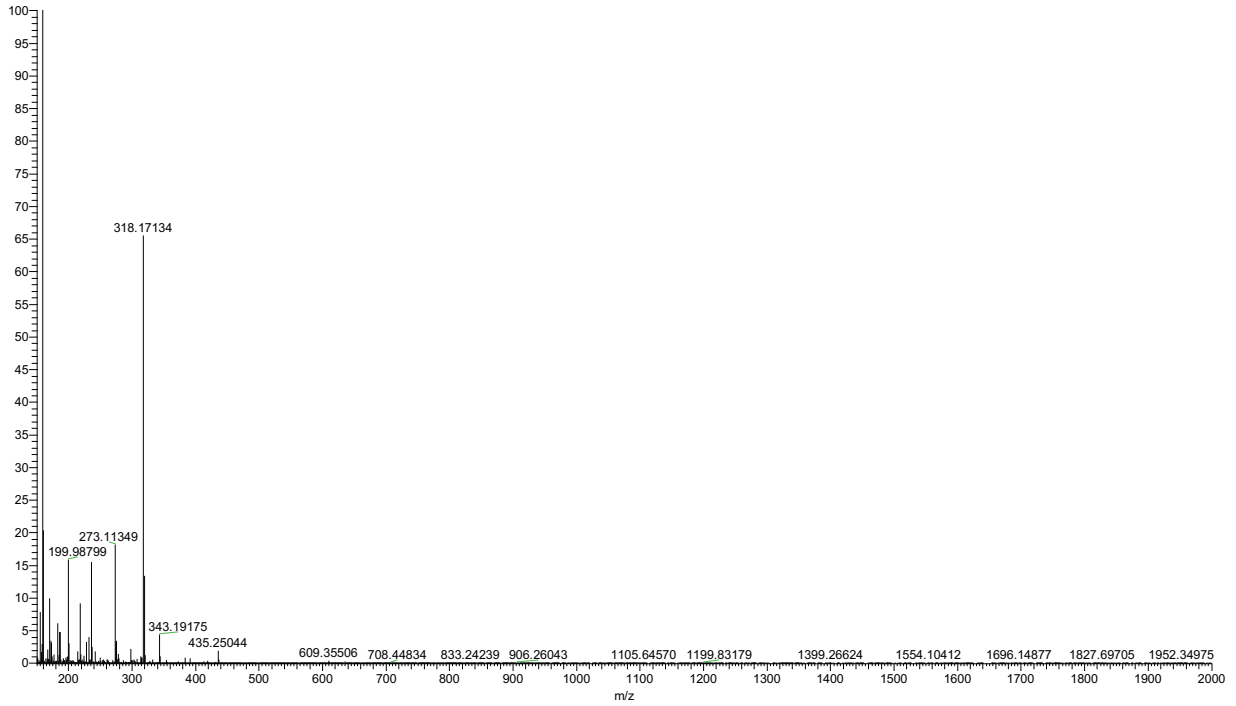

AA-3-27 #501-558 RT: 2.16-2.41 AV: 58 NL: 3.34E7  
T: FTMS + c ESI Full ms [150.0000-2000.0000]

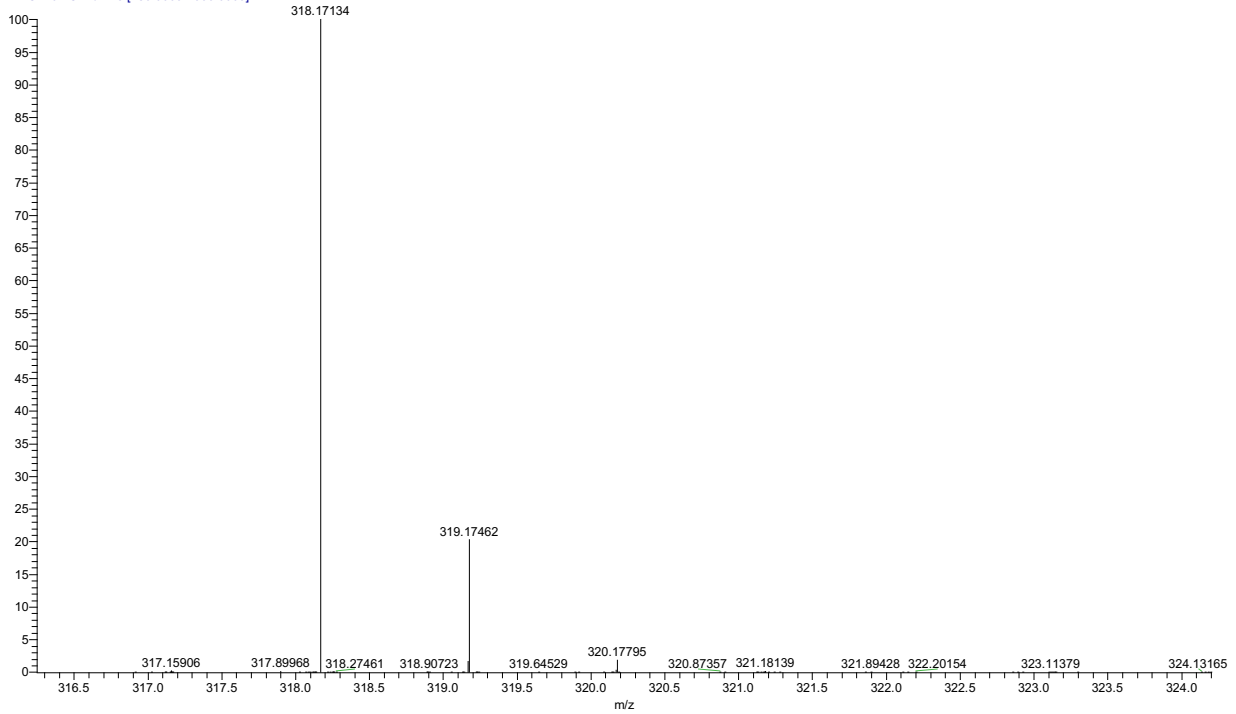

11-(3-(dimethylamino)prop-1-yn-1-yl)-5,6,7,8-tetrahydropyrimido[4',5':3,4]cyclohepta[1,2-b]indol-2-amine (**17**).

<sup>1</sup>H NMR

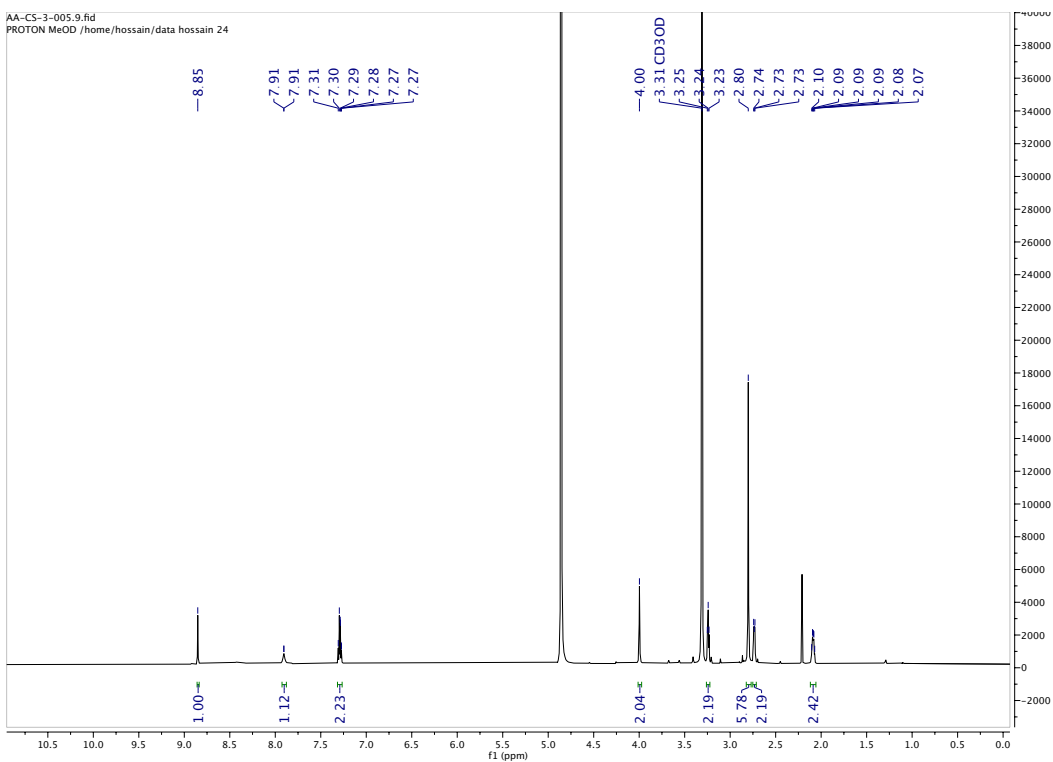

<sup>13</sup>C NMR

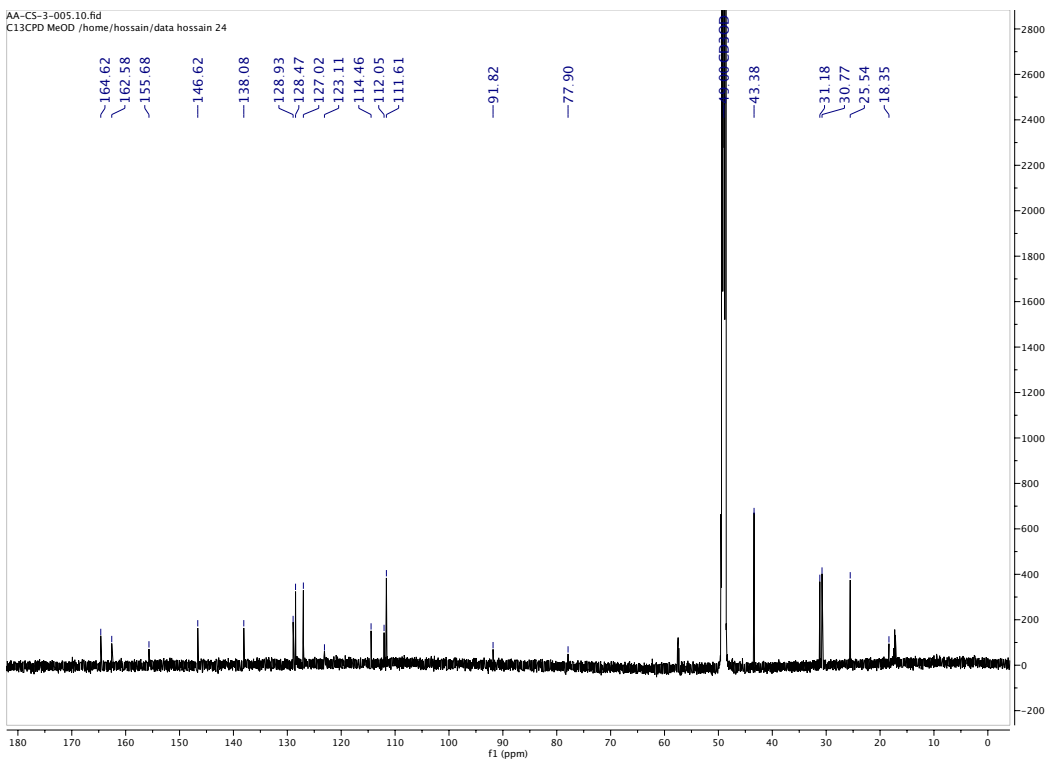

# LC Chromatogram

MaxPeak: 100.00%  
Ret\_Time: 0.723 min

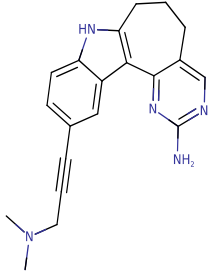

Mol Wt 331.41  
Exact Mass 331.21

| # | Time  | Area%  |
|---|-------|--------|
| 1 | 0.723 | 100.00 |

O694483\$1

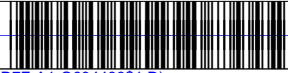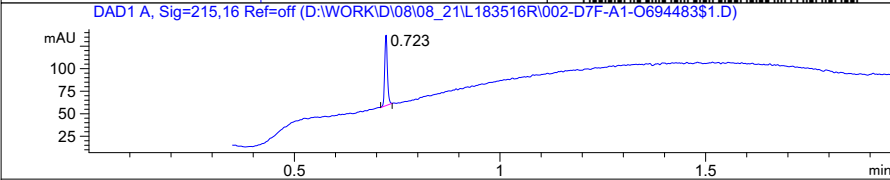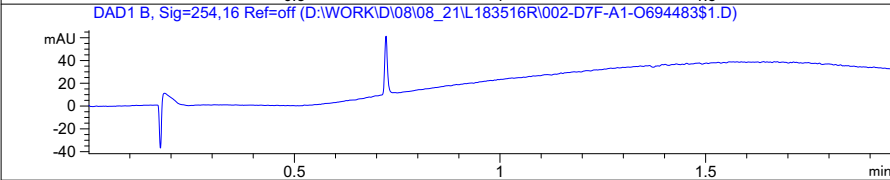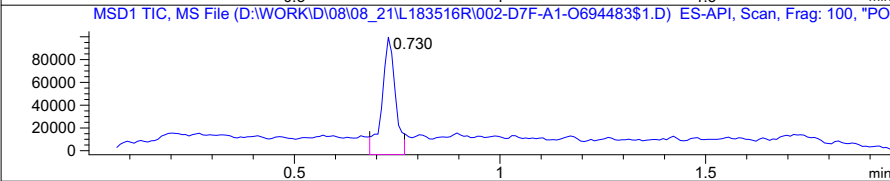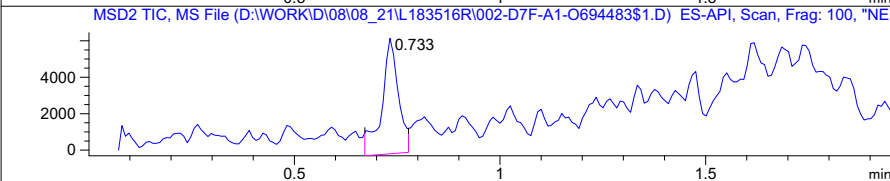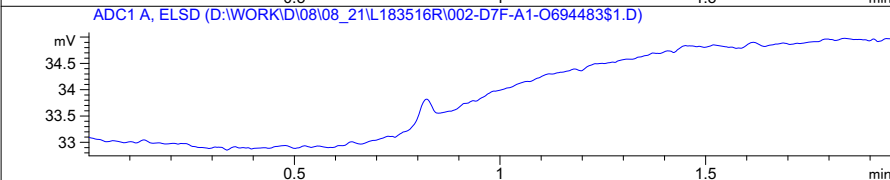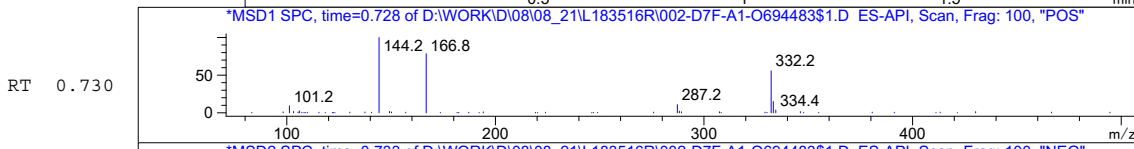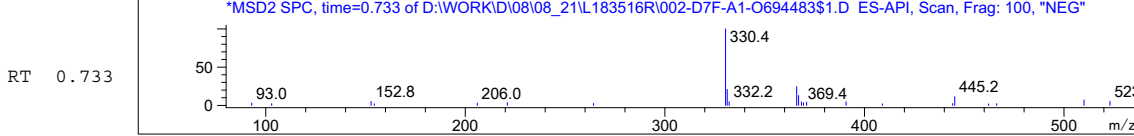

Inj.Date 8/21/2019

K <invalid> -9-

Acq. Method C:\Chem32\--> -->

# HRMS

AA-3-25 #520-559 RT: 2.25-2.41 AV: 40 NL: 2.64E7  
T: FTMS + c ESI Full ms [150.0000-2000.0000]

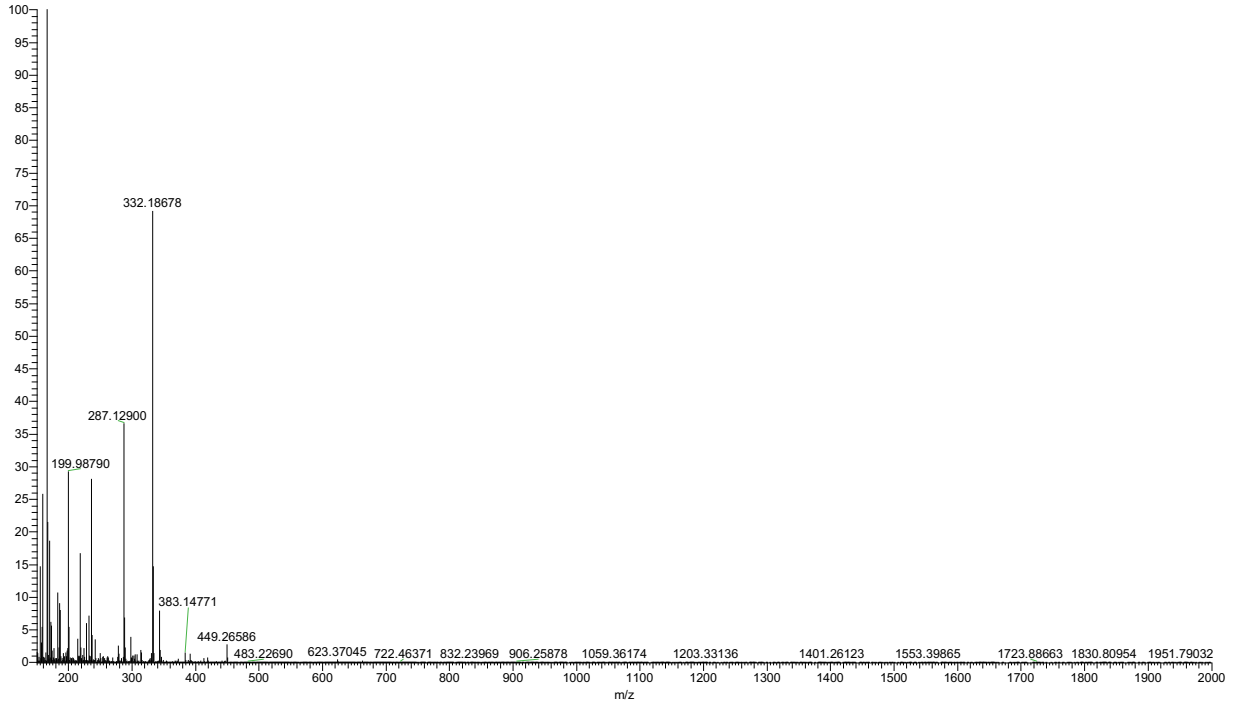

AA-3-25 #520-559 RT: 2.25-2.41 AV: 40 NL: 1.83E7  
T: FTMS + c ESI Full ms [150.0000-2000.0000]

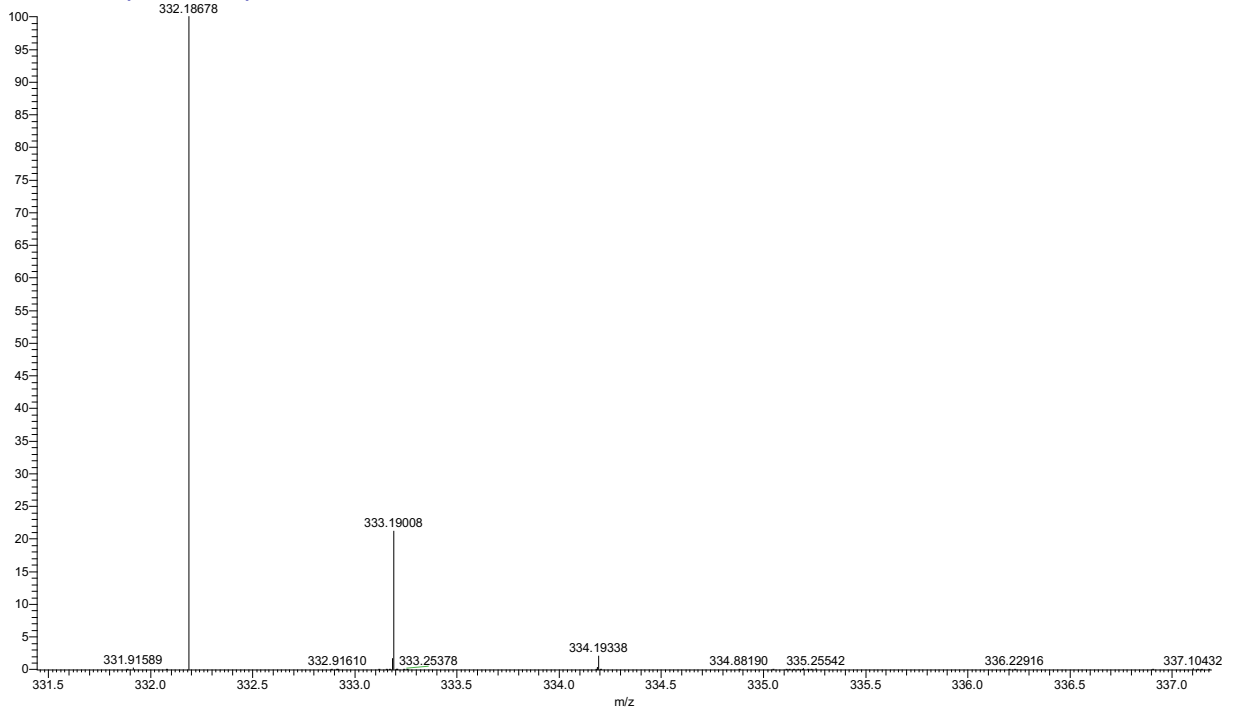

12-(1-methyl-1H-imidazol-5-yl)ethynyl)-6,7,8,9-tetrahydro-5H-pyrimido[4',5':3,4]cycloocta[1,2-b]indol-2-amine (27).

<sup>1</sup>H NMR

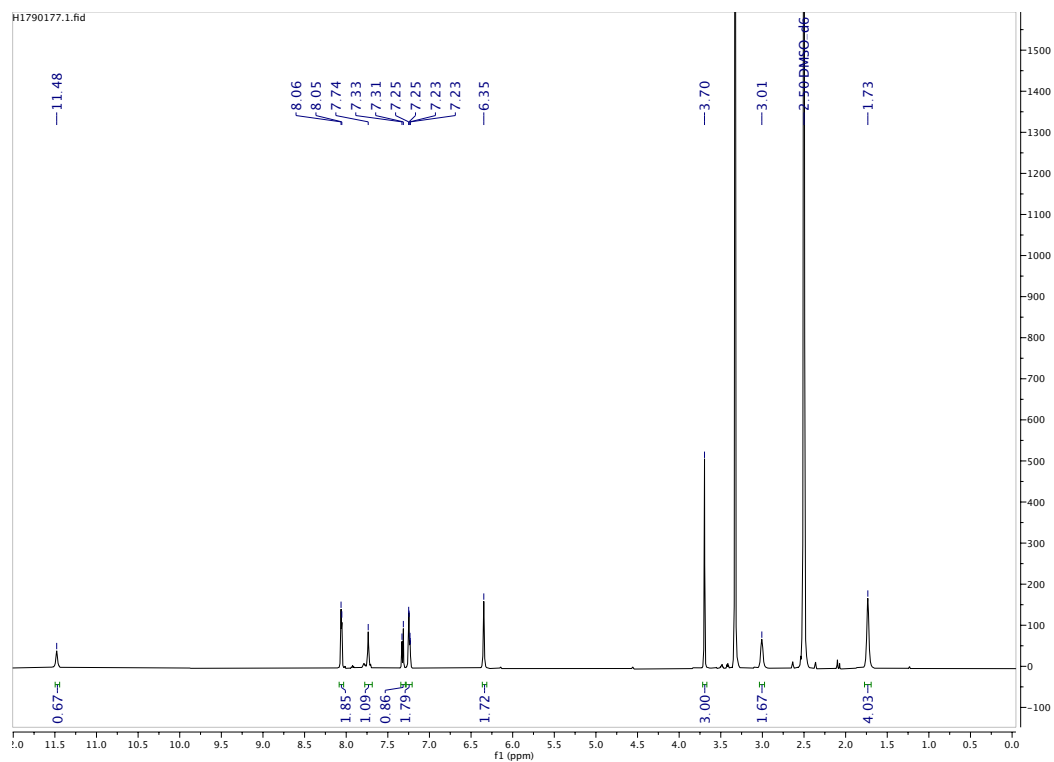

<sup>13</sup>C NMR

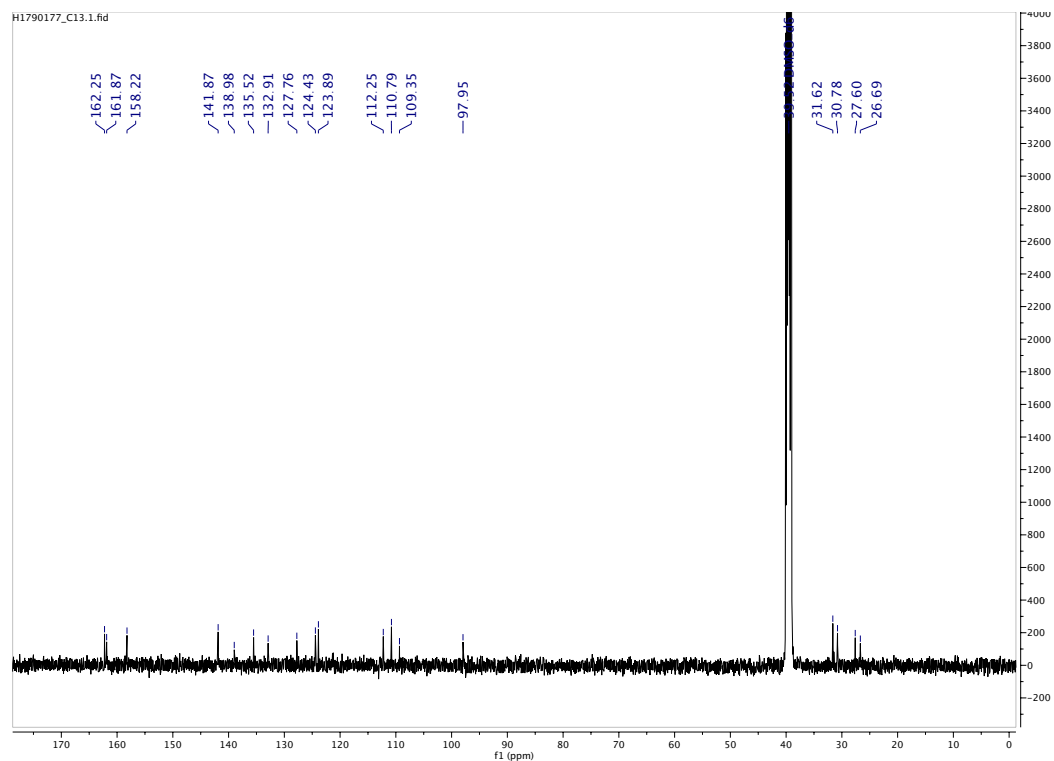

# LC Chromatogram

MaxPeak: 100.00%  
Ret\_Time: 0.855 min

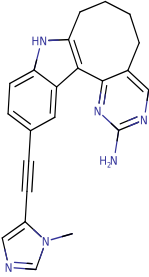

Mol Wt **368.43**  
Exact Mass **368.2**

| # | Time  | Area%  |
|---|-------|--------|
| 1 | 0.855 | 100.00 |

**0541246\$2**

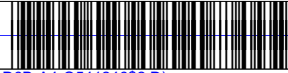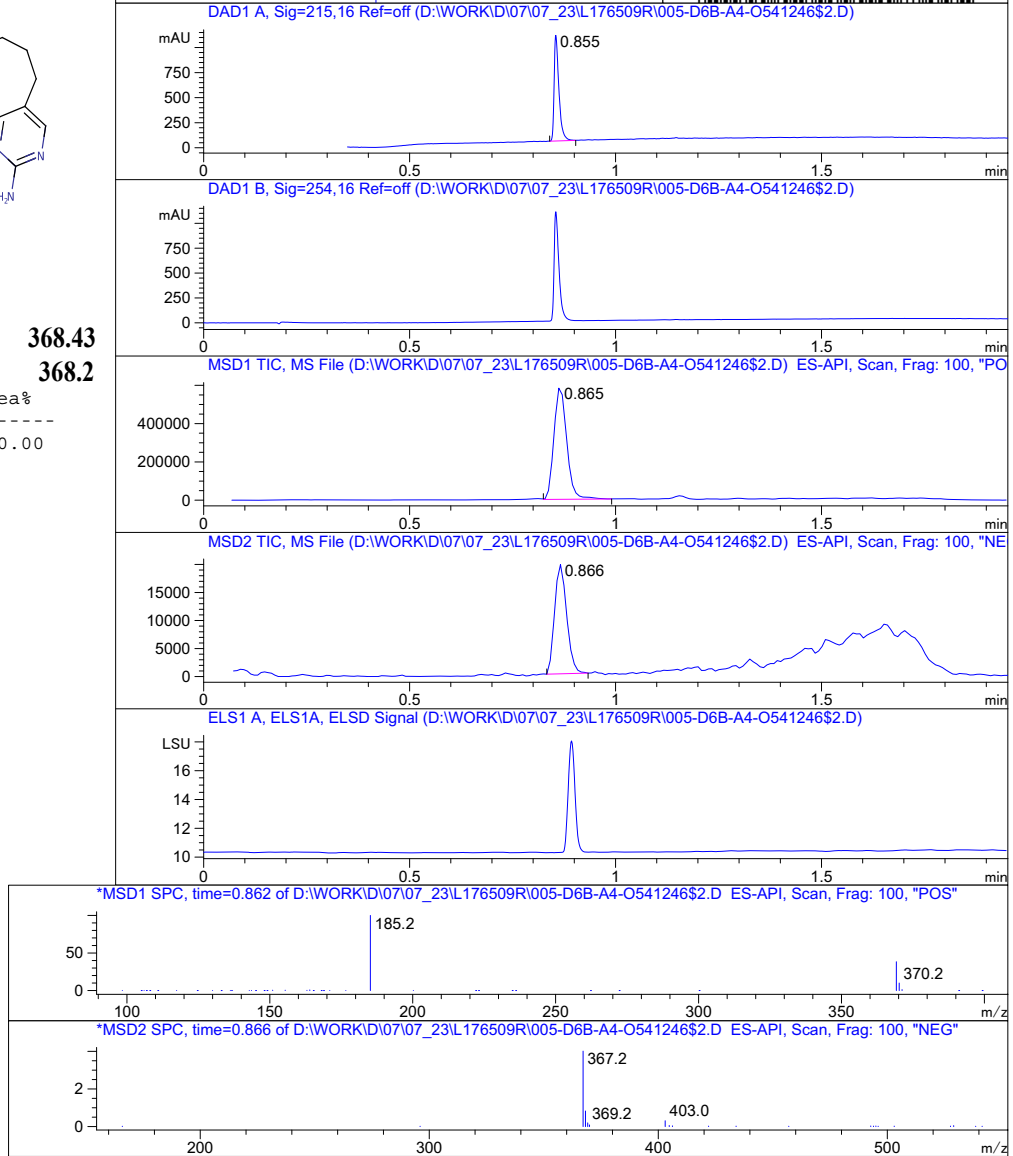

RT 0.865

RT 0.866

Inj.Date 7/23/2019

K <invalid> -15-

Acq. Method C:\Chem32\> ->

Target Compound Screening Report

|                                 |                                        |                               |                                                     |
|---------------------------------|----------------------------------------|-------------------------------|-----------------------------------------------------|
| <b>Data File</b>                | H1790176a.d                            | <b>Sample Name</b>            | H1790176                                            |
| <b>Sample Type</b>              | Sample                                 | <b>Position</b>               | P1-E1                                               |
| <b>Instrument Name</b>          | Instrument 1                           | <b>User Name</b>              | Denis V.Bylina                                      |
| <b>Acq Method</b>               | Fast_Gradient_HRMS_pos_Lock_08272019.m | <b>Acquired Time</b>          | 5/7/2021 8:55:19 PM (UTC+03:00)                     |
| <b>IRM Calibration Status</b>   | Success                                | <b>DA Method</b>              | Fast_Gradient_HRMS_pos_Lock_08272019.m              |
| <b>Comment</b>                  |                                        |                               |                                                     |
| <b>Sample Group</b>             |                                        | <b>Info.</b>                  |                                                     |
| <b>MFC</b>                      | C22H20N6                               | <b>Stream Name</b>            | LC 1                                                |
| <b>Acquisition Time (Local)</b> | 5/7/2021 8:55:19 PM (UTC+03:00)        | <b>Acquisition SW Version</b> | 6200 series TOF/6500 series Q-TOF B.08.00 (B8058.0) |
| <b>TOF Driver Version</b>       | 8.00.00                                | <b>TOF Firmware Version</b>   | 8.643                                               |
| <b>Tune Mass Range Max.</b>     | 1700                                   |                               |                                                     |

Compound Table

| Label                    | Tgt Score | Mass Error (ppm) | Tgt Formula | Obs. RT | Ref. Mass | Obs. Mass |
|--------------------------|-----------|------------------|-------------|---------|-----------|-----------|
| Cpd 1: C22 H20 N6; 1.969 | 97.19     | 0.04             | C22 H20 N6  | 1.969   | 368.1749  | 368.175   |

| Obs. m/z | Obs. RT | Obs. Mass | Tgt Formula | Tgt Mass | Tgt Mass Error (ppm) | RT Diff.        | Find Cpds Algorithm |
|----------|---------|-----------|-------------|----------|----------------------|-----------------|---------------------|
| 369.1822 | 1.969   | 368.175   | C22 H20 N6  | 368.1749 | 0.04                 | Find By Formula |                     |

Compound Chromatograms

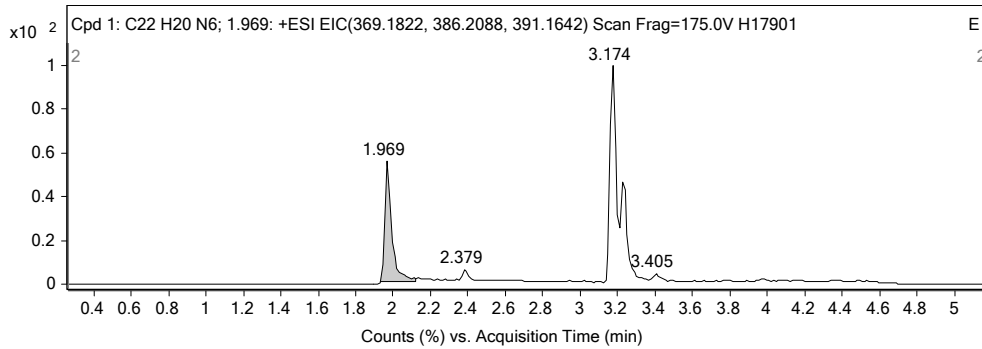

MS Zoomed Spectrum

12-(cyclopropylethynyl)-6,7,8,9-tetrahydro-5H-pyrimido[4',5':3,4]cycloocta[1,2-b]indol-2-amine (28).

<sup>1</sup>H NMR

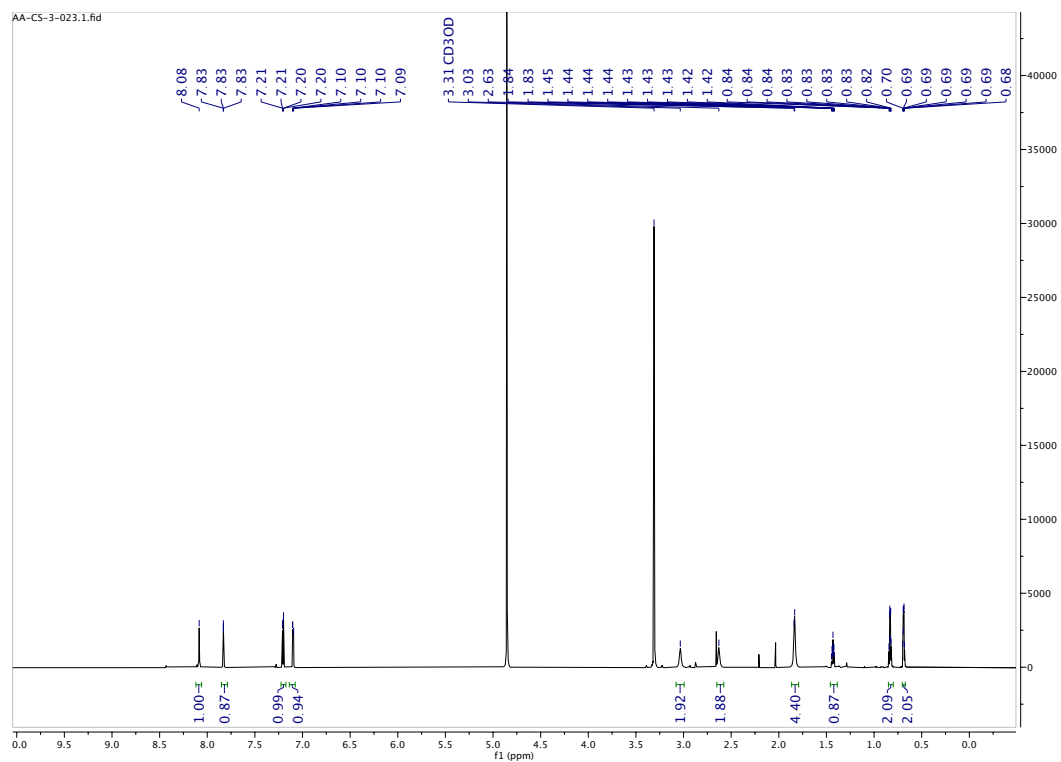

<sup>13</sup>C NMR

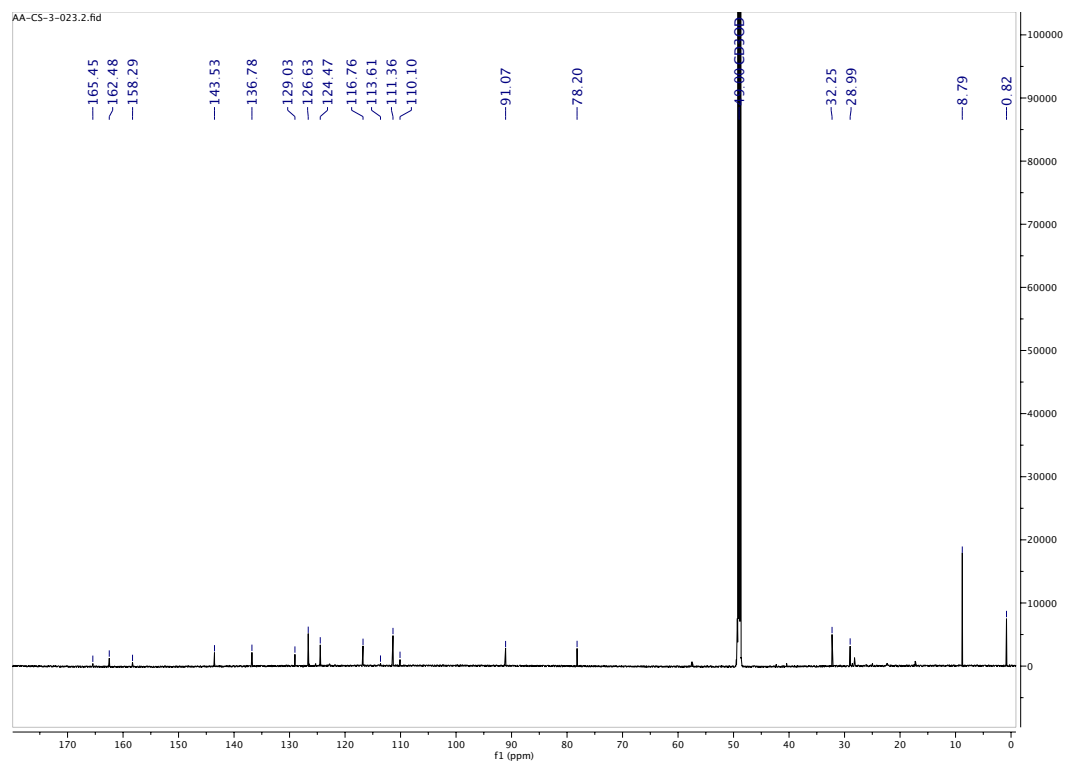



# LC Chromatogram

MaxPeak: 97.53%  
Ret\_Time: 1.100 min

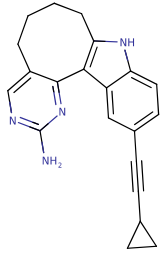

Mol Wt 328.41  
Exact Mass 328.2

| # | Time  | Area% |
|---|-------|-------|
| 1 | 1.100 | 97.53 |
| 2 | 1.318 | 2.47  |

O617249\$1

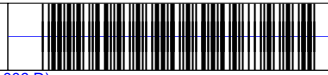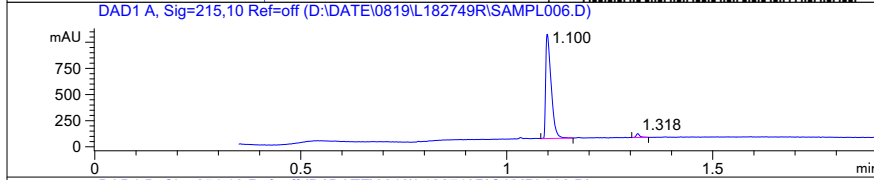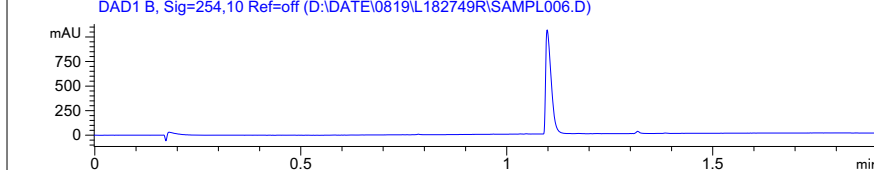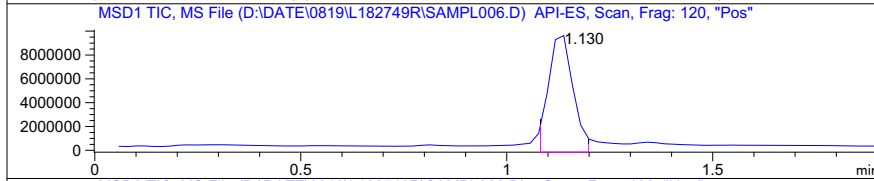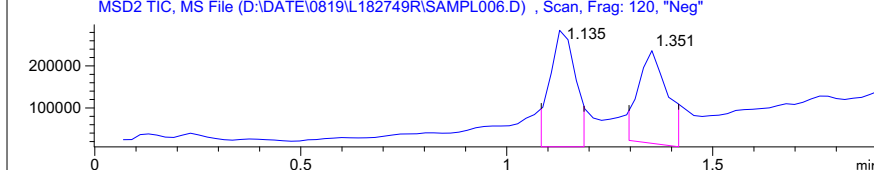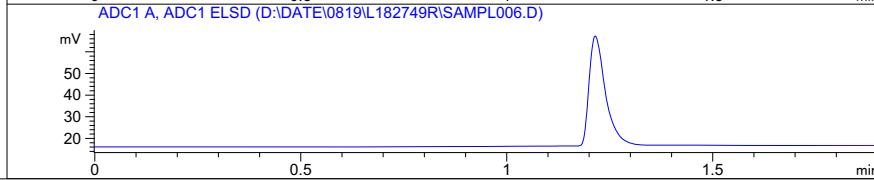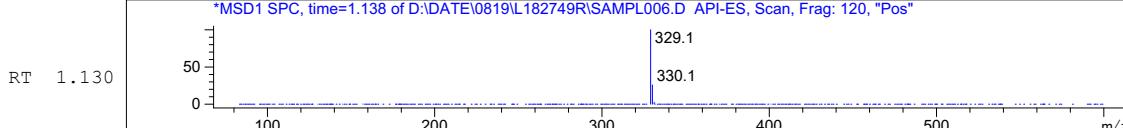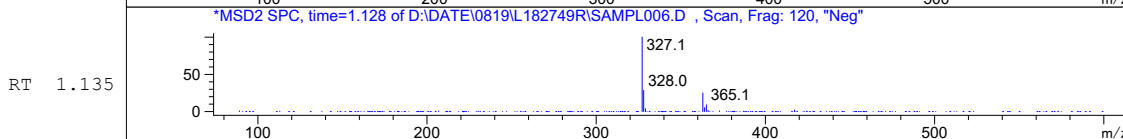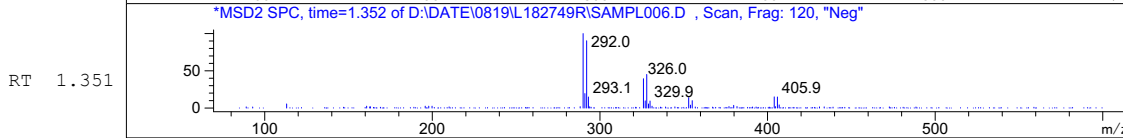

Inj.Date 8/19/2019

E

P2-A-03 VL

Acq. Method C:\HPCHEM\--> -->

# HRMS

AA-3-23 #810-868 RT: 3.50-3.75 AV: 59 NL: 5.46E8  
T: FTMS + c ESI Full ms [150.0000-2000.0000]

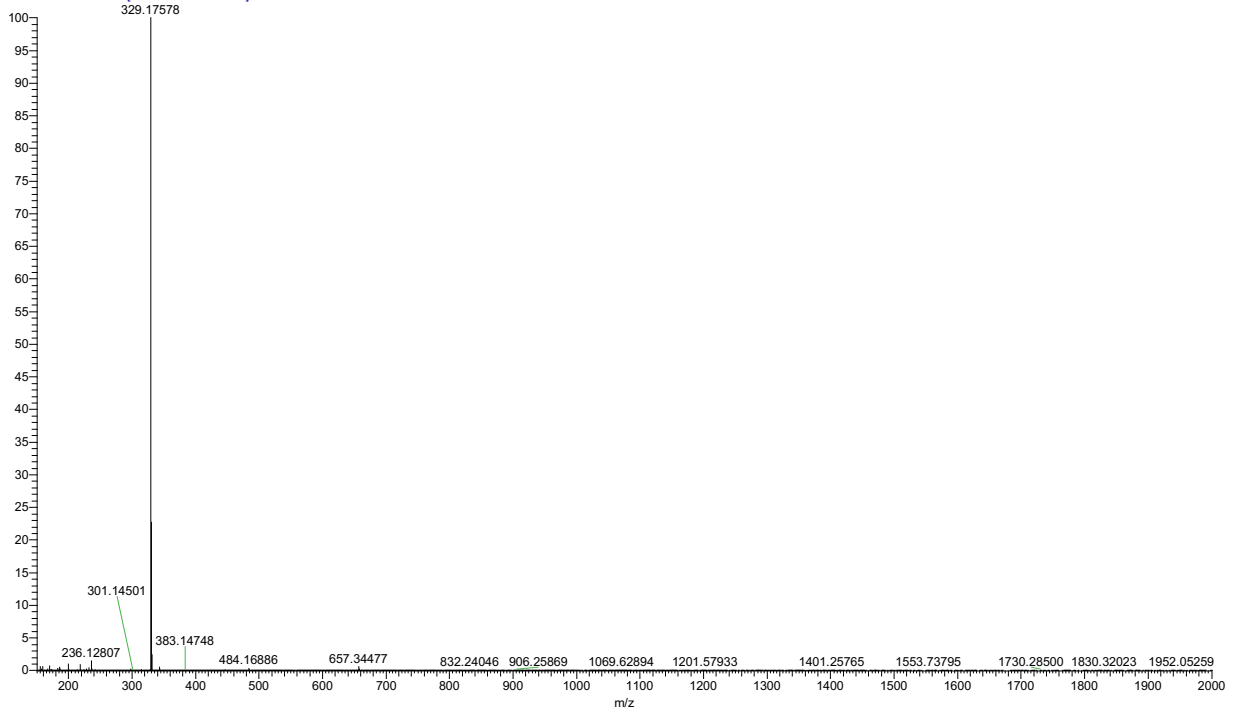

AA-3-23 #810-868 RT: 3.50-3.75 AV: 59 NL: 5.46E8  
T: FTMS + c ESI Full ms [150.0000-2000.0000]

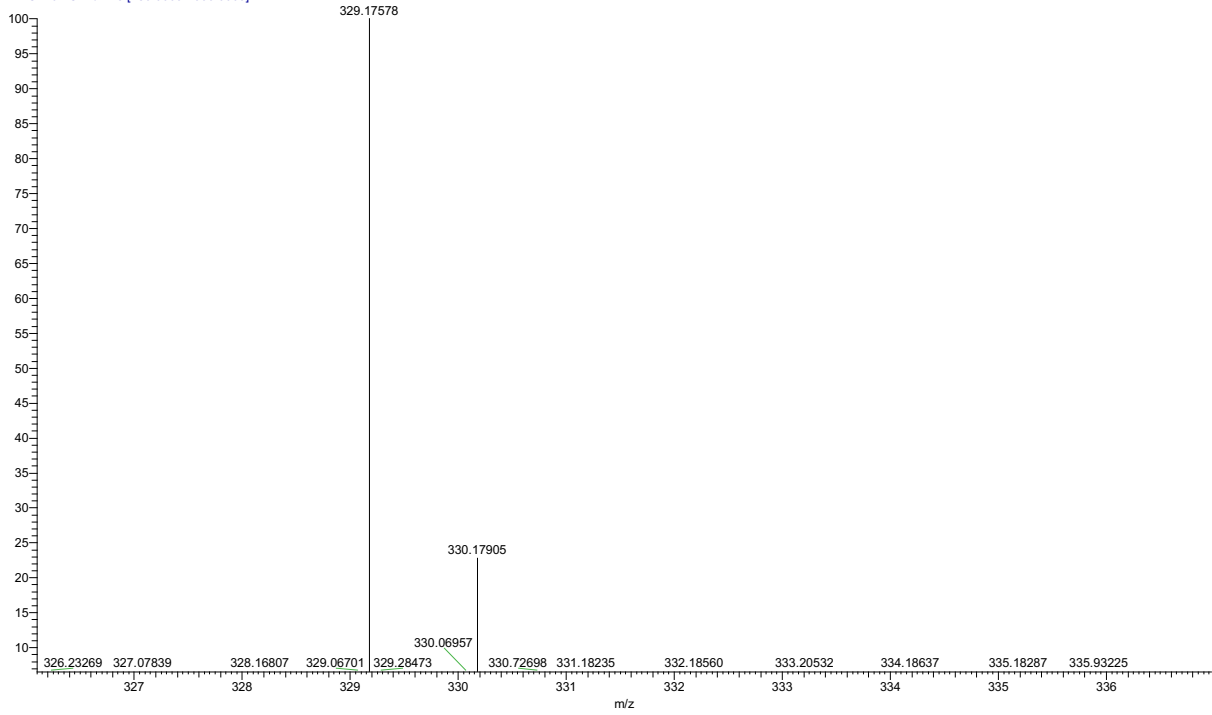

12-(3-(dimethylamino)prop-1-yn-1-yl)-6,7,8,9-tetrahydro-5H-pyrimido[4',5':3,4] cycloocta[1,2-b]indol-2-amine (29).

<sup>1</sup>H NMR

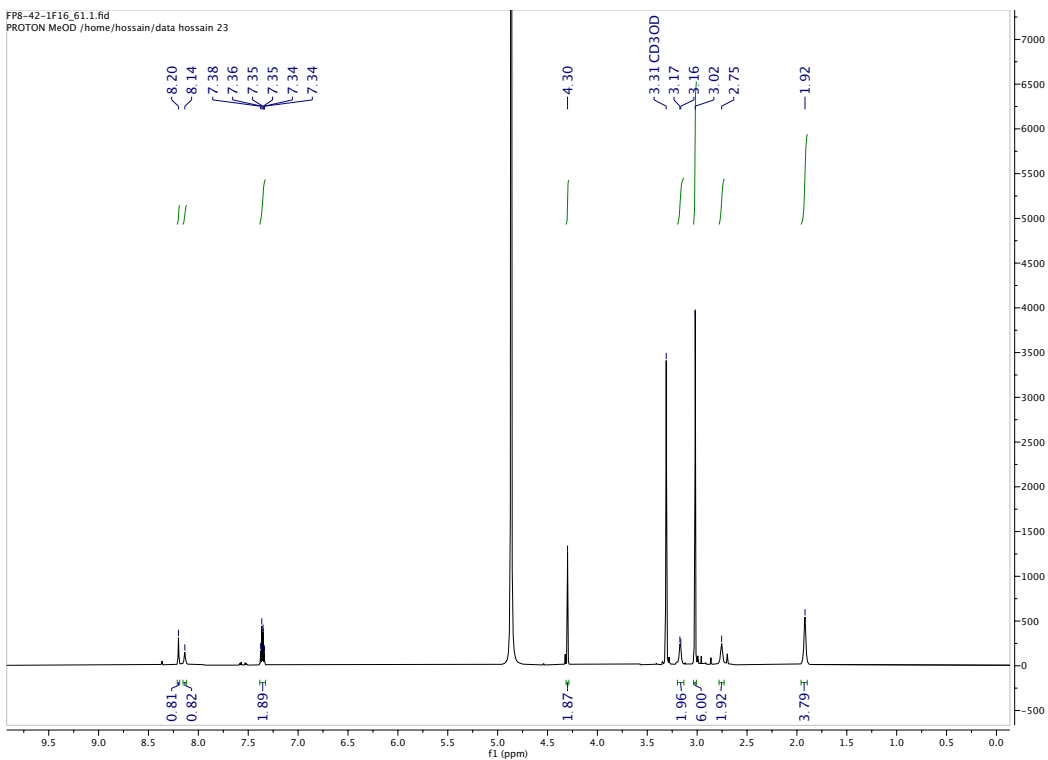

<sup>13</sup>C NMR

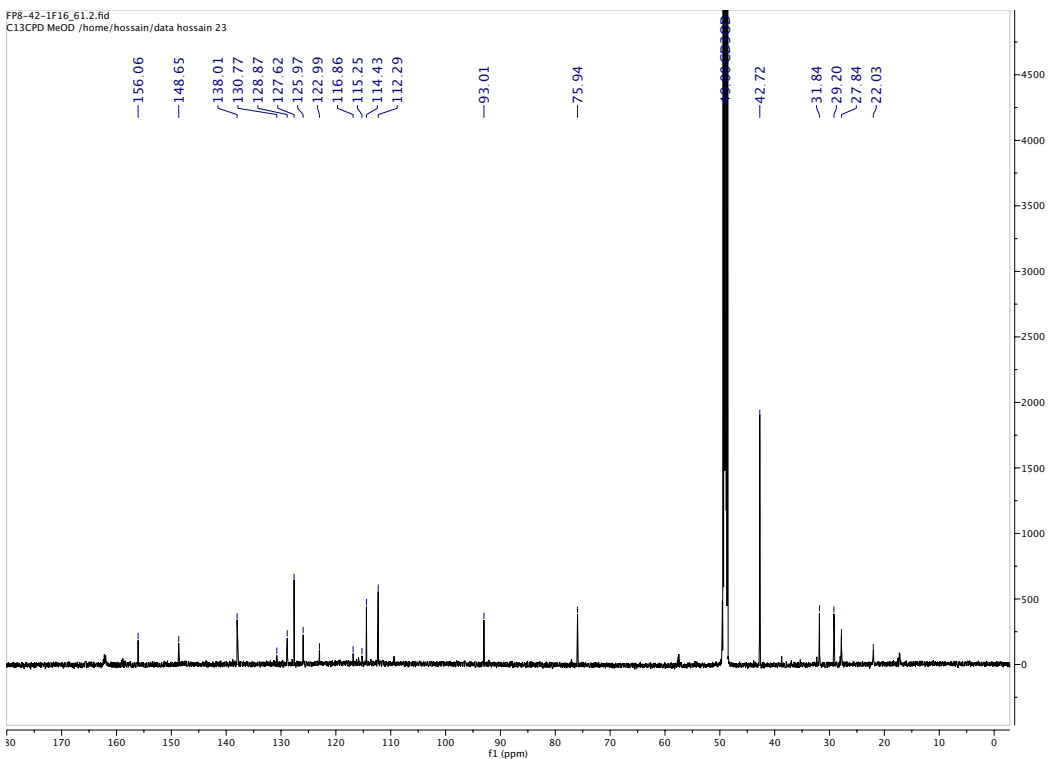

# LC Chromatogram

MaxPeak: 95.61%  
Ret\_Time: 0.793 min

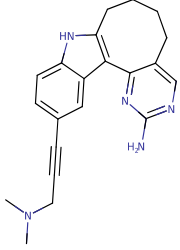

Mol Wt 345.44

Exact Mass 345.23

| # | Time  | Area% |
|---|-------|-------|
| 1 | 0.646 | 2.02  |
| 2 | 0.793 | 95.61 |
| 3 | 1.104 | 2.36  |

O696164\$1

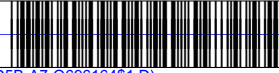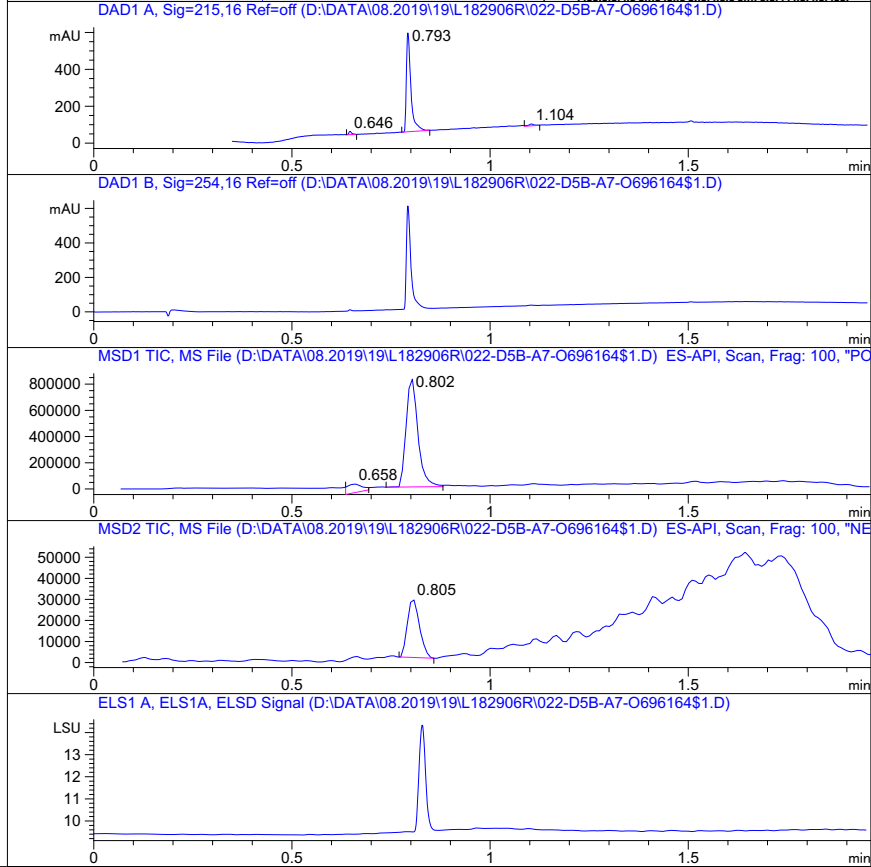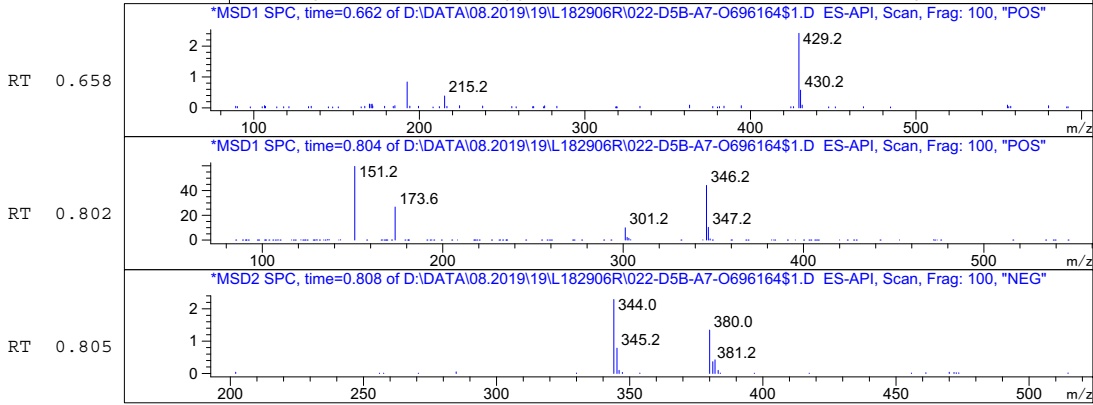

Inj.Date 8/19/2019

CH

<invalid> -17-

Acq. Method C:\Chem32\ -> --

# HRMS

AA-3-22 #538-585 RT: 2.32-2.53 AV: 48 NL: 1.24E8  
T: FTMS + c ESI Full ms [150.0000-2000.0000]

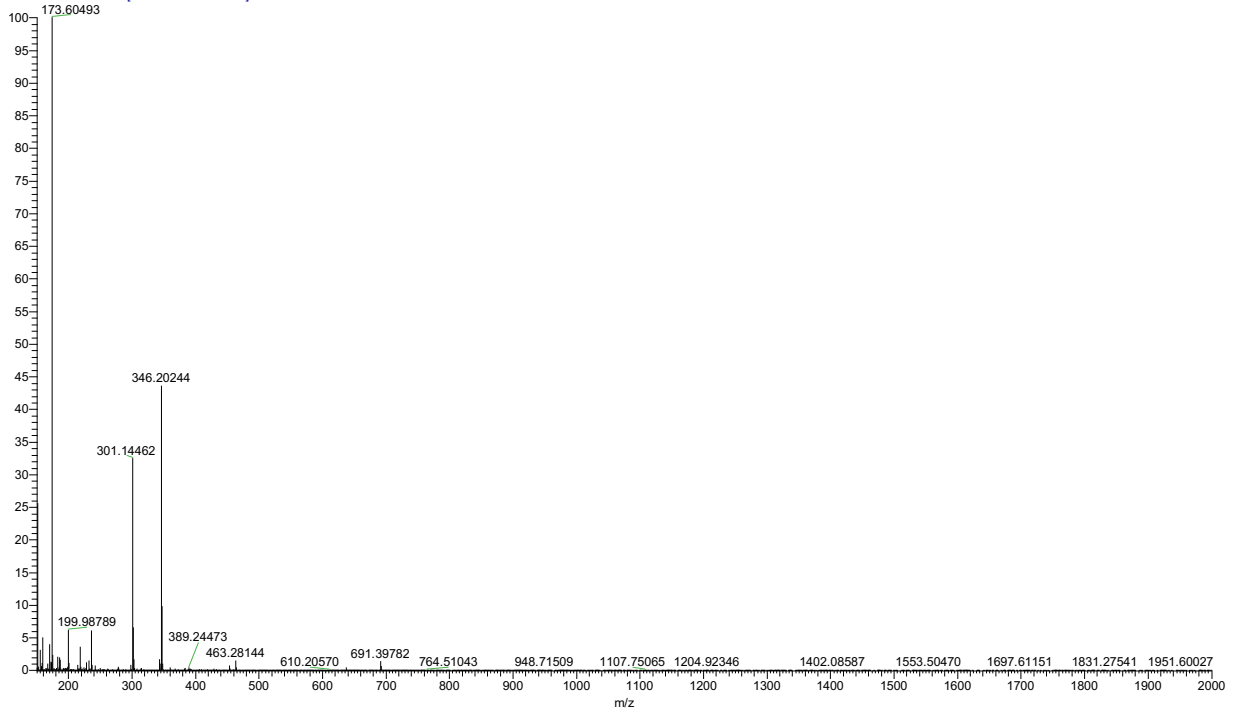

AA-3-22 #538-585 RT: 2.32-2.53 AV: 48 NL: 5.42E7  
T: FTMS + c ESI Full ms [150.0000-2000.0000]

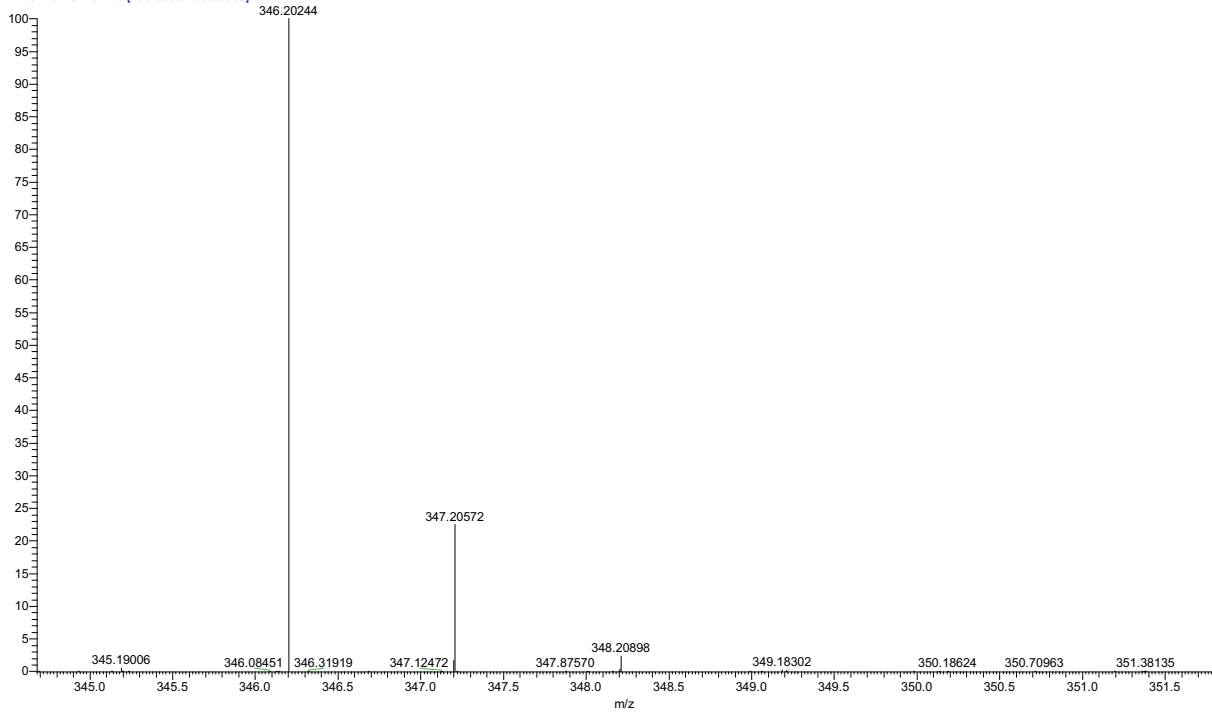

*N*-(4-2-amino-5,6,7,8-tetrahydropyrimido[4',5':3,4]cyclohepta[1,2-*b*]indol-11-yl)-2-methylbut-3-yn-2-yl)acetamide (**18**).

<sup>1</sup>H NMR

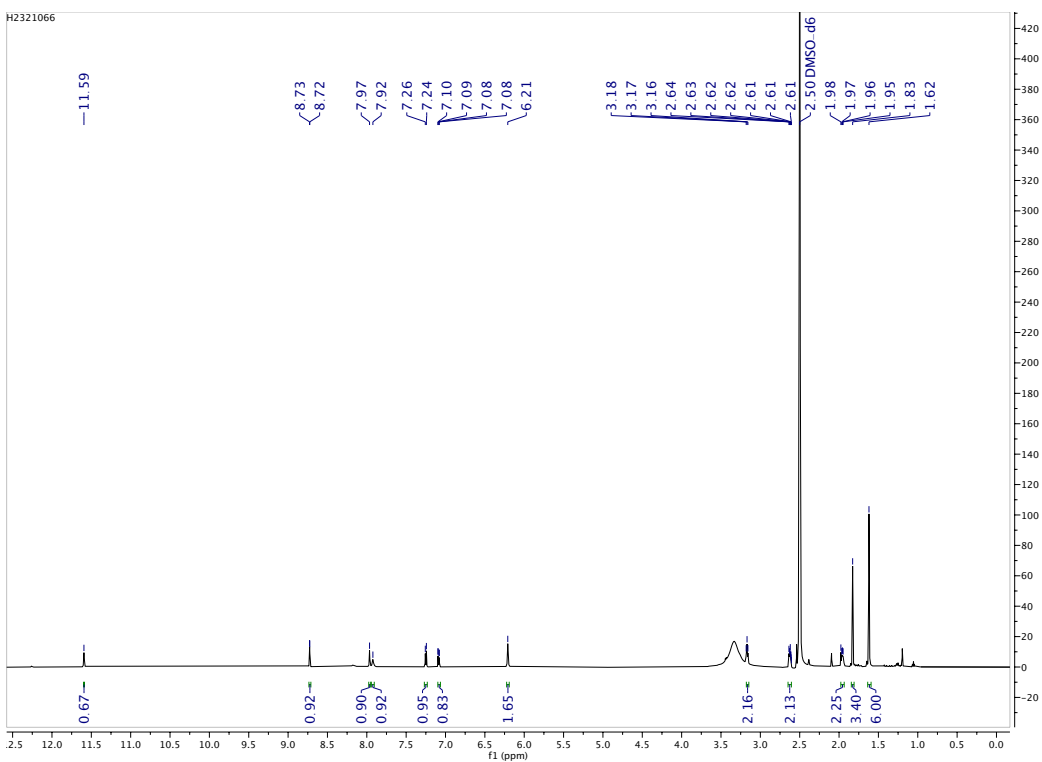

<sup>13</sup>C NMR

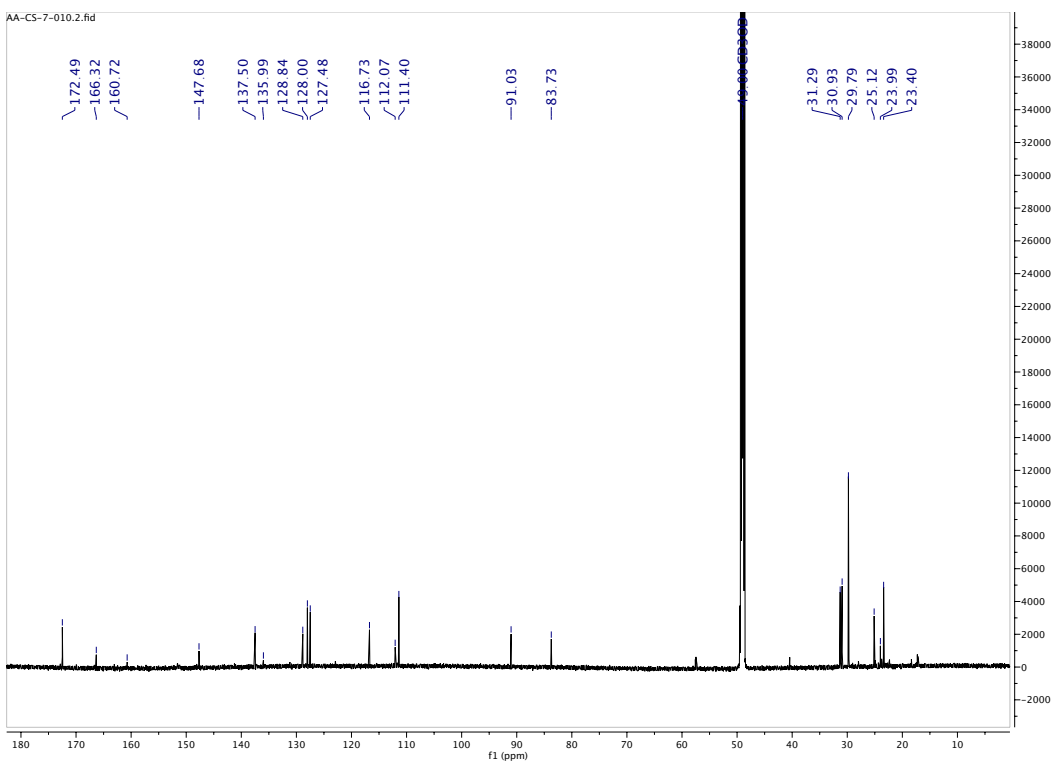

# LC Chromatogram

MaxPeak: 97.62%  
Ret\_Time: 0.796 min

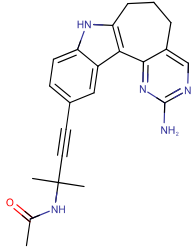

Mol Wt 373.45  
Exact Mass 373.22

| # | Time  | Area% |
|---|-------|-------|
| 1 | 0.784 | 2.38  |
| 2 | 0.796 | 97.62 |

Q301618\$2

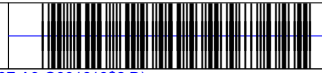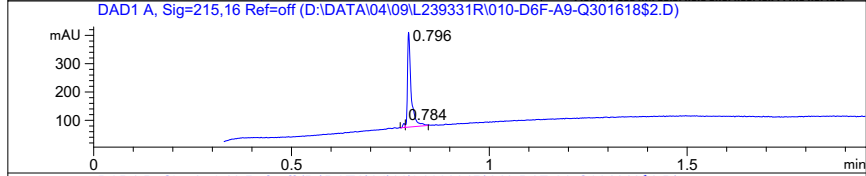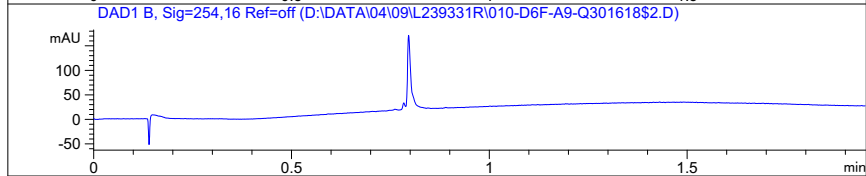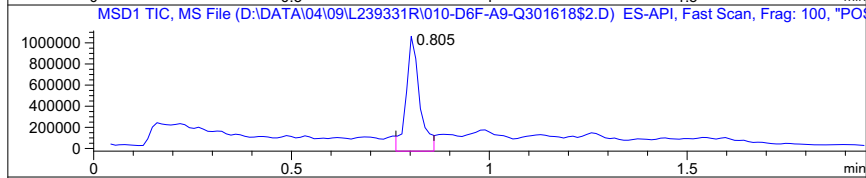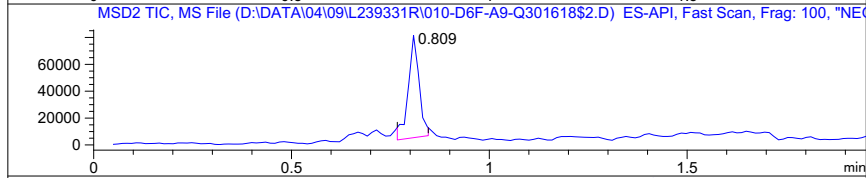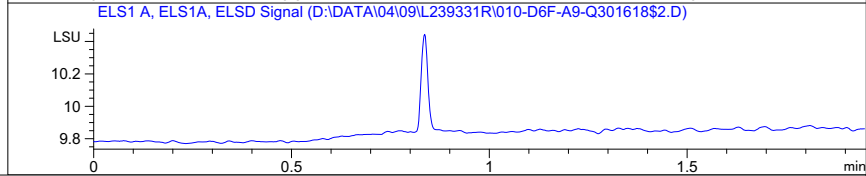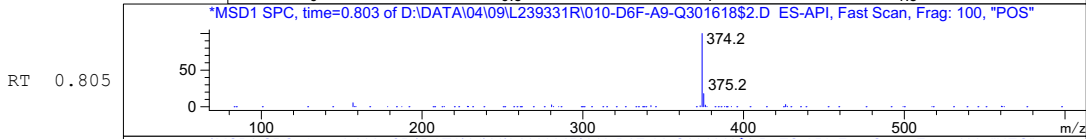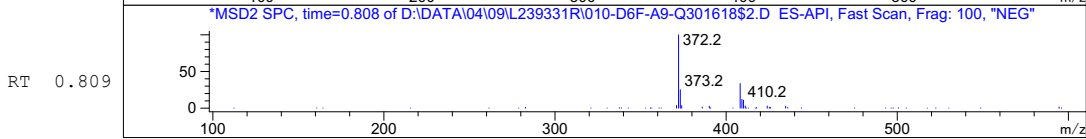

Inj.Date 4/8/2020

LB

Acq. Method C:\Users\ -> ->

Target Compound Screening Report

|                                 |                                        |                               |                                                     |
|---------------------------------|----------------------------------------|-------------------------------|-----------------------------------------------------|
| <b>Data File</b>                | H2321066.d                             | <b>Sample Name</b>            | H2321066                                            |
| <b>Sample Type</b>              | Sample                                 | <b>Position</b>               | P1-B9                                               |
| <b>Instrument Name</b>          | Instrument 1                           | <b>User Name</b>              | Denis V.Bylina                                      |
| <b>Acq Method</b>               | Fast_Gradient_HRMS_pos_Lock_08272019.m | <b>Acquired Time</b>          | 5/7/2021 7:32:58 PM (UTC+03:00)                     |
| <b>IRM Calibration Status</b>   | Success                                | <b>DA Method</b>              | Fast_Gradient_HRMS_pos_Lock_08272019.m              |
| <b>Comment</b>                  |                                        |                               |                                                     |
| <b>Sample Group</b>             |                                        | <b>Info.</b>                  |                                                     |
| <b>MFC</b>                      | C22H23N5O                              | <b>Stream Name</b>            | LC 1                                                |
| <b>Acquisition Time (Local)</b> | 5/7/2021 7:32:58 PM (UTC+03:00)        | <b>Acquisition SW Version</b> | 6200 series TOF/6500 series Q-TOF B.08.00 (B8058.0) |
| <b>TOF Driver Version</b>       | 8.00.00                                | <b>TOF Firmware Version</b>   | 8.643                                               |
| <b>Tune Mass Range Max.</b>     | 1700                                   |                               |                                                     |

Compound Table

| Label                      | Tgt Score | Mass Error (ppm) | Tgt Formula  | Obs. RT | Ref. Mass | Obs. Mass |
|----------------------------|-----------|------------------|--------------|---------|-----------|-----------|
| Cpd 1: C22 H23 N5 O; 2.217 | 77.35     | -2.66            | C22 H23 N5 O | 2.217   | 373.1903  | 373.1893  |

| Obs. m/z | Obs. RT | Obs. Mass | Tgt Formula  | Tgt Mass | Tgt Mass Error (ppm) | RT Diff.        | Find Cpsd Algorithm |
|----------|---------|-----------|--------------|----------|----------------------|-----------------|---------------------|
| 374.1975 | 2.217   | 373.1893  | C22 H23 N5 O | 373.1903 | -2.66                | Find By Formula |                     |

Compound Chromatograms

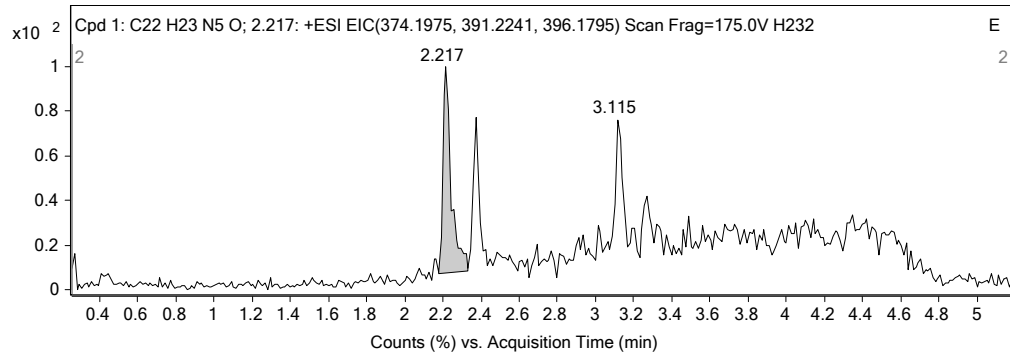

MS Zoomed Spectrum



*N*-(4-(2-amino-5,6,7,8-tetrahydropyrimido[4',5':3,4]cyclohepta[1,2-*b*]indol-11-yl)-2-methylbut-3-yn-2-yl)methanesulfonamide (**19**).

<sup>1</sup>H NMR

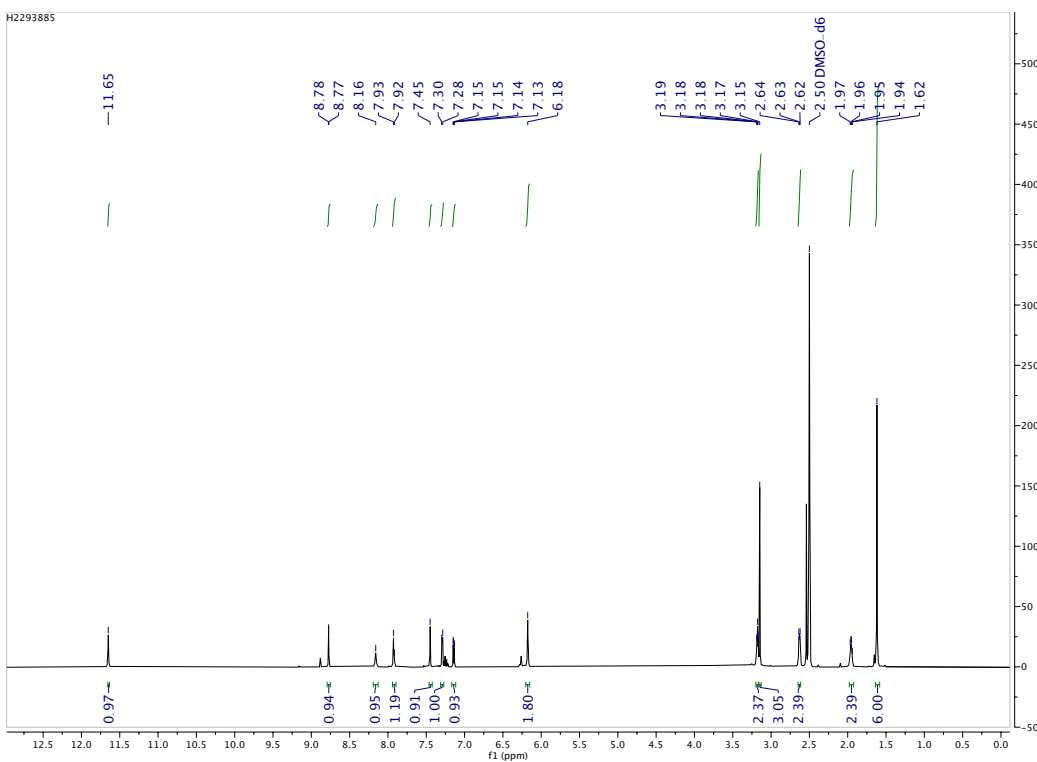

<sup>13</sup>C NMR

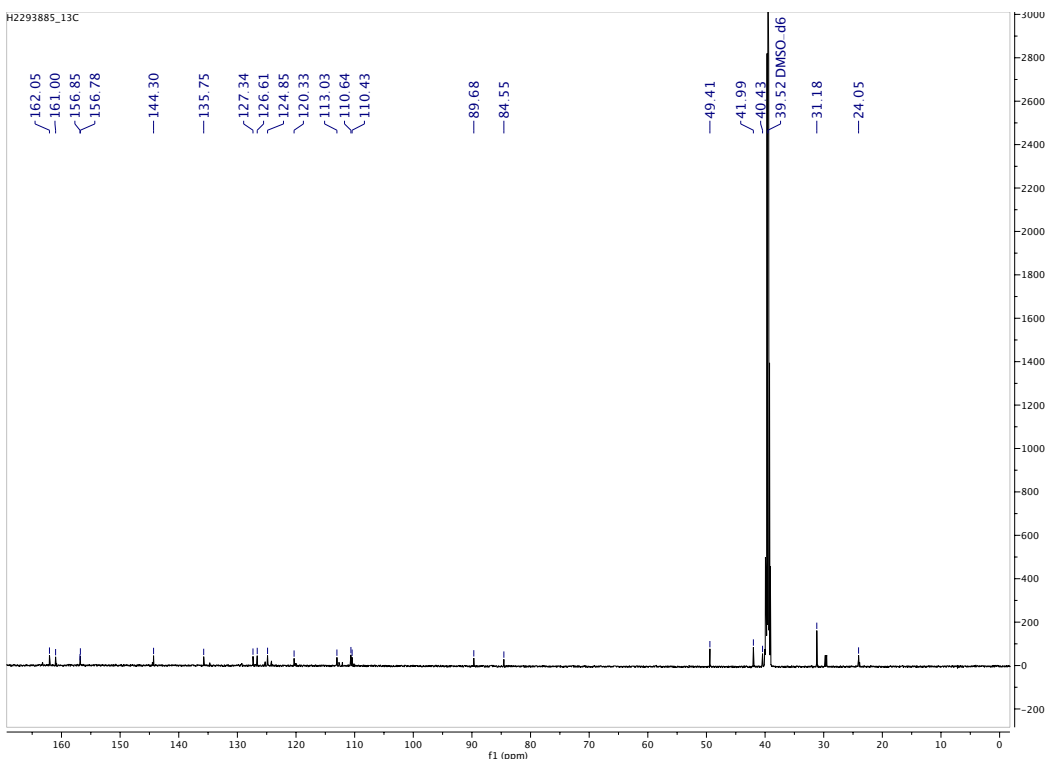

# LC Chromatogram

MaxPeak: 95.31%  
Ret\_Time: 0.749 min

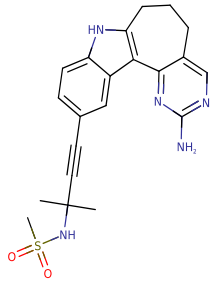

Mol Wt 409.5  
Exact Mass 409.18

| # | Time  | Area% |
|---|-------|-------|
| 1 | 0.731 | 4.69  |
| 2 | 0.749 | 95.31 |

Q184368\$2

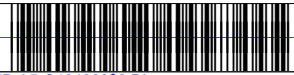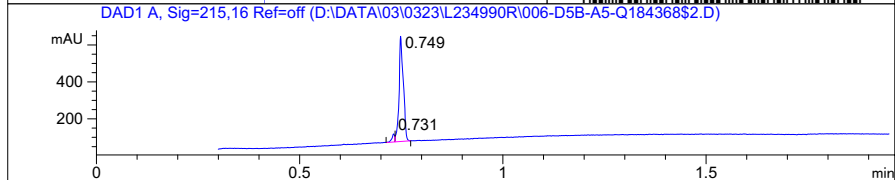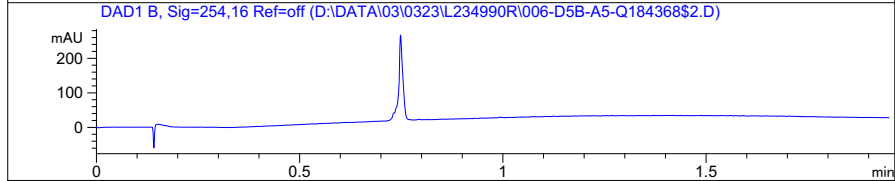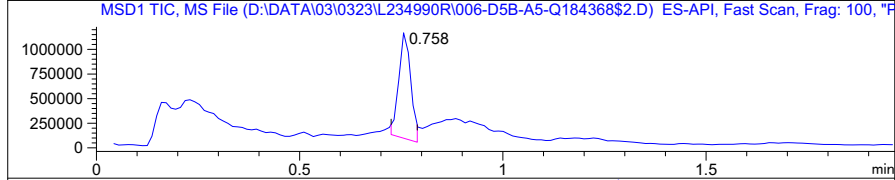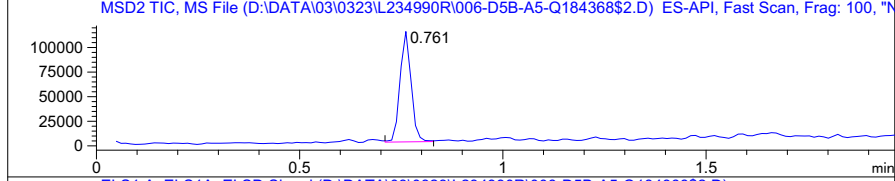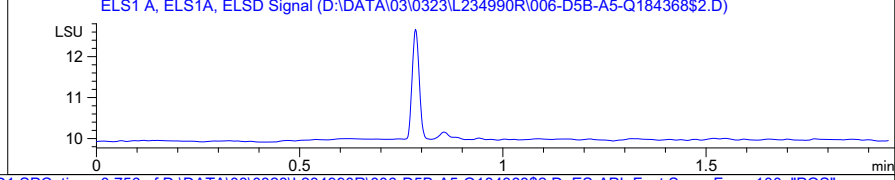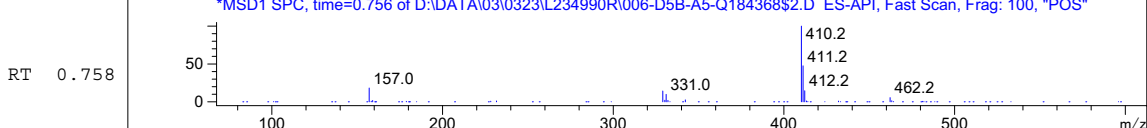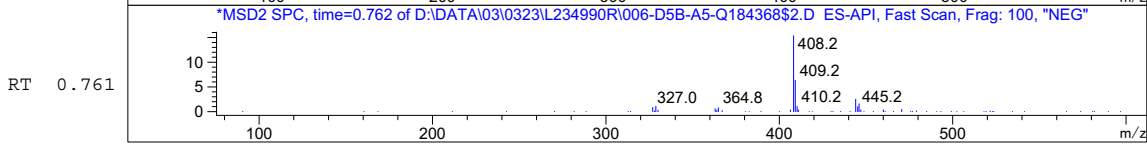

Target Compound Screening Report

|                                 |                                        |                               |                                                     |
|---------------------------------|----------------------------------------|-------------------------------|-----------------------------------------------------|
| <b>Data File</b>                | H2293885.d                             | <b>Sample Name</b>            | H2293885                                            |
| <b>Sample Type</b>              | Sample                                 | <b>Position</b>               | P1-A8                                               |
| <b>Instrument Name</b>          | Instrument 1                           | <b>User Name</b>              | Denis V.Bylina                                      |
| <b>Acq Method</b>               | Fast_Gradient_HRMS_pos_Lock_08272019.m | <b>Acquired Time</b>          | 5/7/2021 6:32:18 PM (UTC+03:00)                     |
| <b>IRM Calibration Status</b>   | Success                                | <b>DA Method</b>              | Fast_Gradient_HRMS_pos_Lock_08272019.m              |
| <b>Comment</b>                  |                                        |                               |                                                     |
| <b>Sample Group</b>             |                                        | <b>Info.</b>                  |                                                     |
| <b>MFC</b>                      | C21H23N5O2S                            | <b>Stream Name</b>            | LC 1                                                |
| <b>Acquisition Time (Local)</b> | 5/7/2021 6:32:18 PM (UTC+03:00)        | <b>Acquisition SW Version</b> | 6200 series TOF/6500 series Q-TOF B.08.00 (B8058.0) |
| <b>TOF Driver Version</b>       | 8.00.00                                | <b>TOF Firmware Version</b>   | 8.643                                               |
| <b>Tune Mass Range Max.</b>     | 1700                                   |                               |                                                     |

Compound Table

| Label                         | Tgt Score | Mass Error (ppm) | Tgt Formula     | Obs. RT | Ref. Mass | Obs. Mass |
|-------------------------------|-----------|------------------|-----------------|---------|-----------|-----------|
| Cpd 1: C21 H23 N5 O2 S; 2.262 | 85.33     | 0.65             | C21 H23 N5 O2 S | 2.262   | 409.1572  | 409.1575  |

| Obs. m/z | Obs. RT | Obs. Mass | Tgt Formula     | Tgt Mass | Tgt Mass Error (ppm) | RT Diff.        | Find Cpds Algorithm |
|----------|---------|-----------|-----------------|----------|----------------------|-----------------|---------------------|
| 410.1645 | 2.262   | 409.1575  | C21 H23 N5 O2 S | 409.1572 | 0.65                 | Find By Formula |                     |

Compound Chromatograms

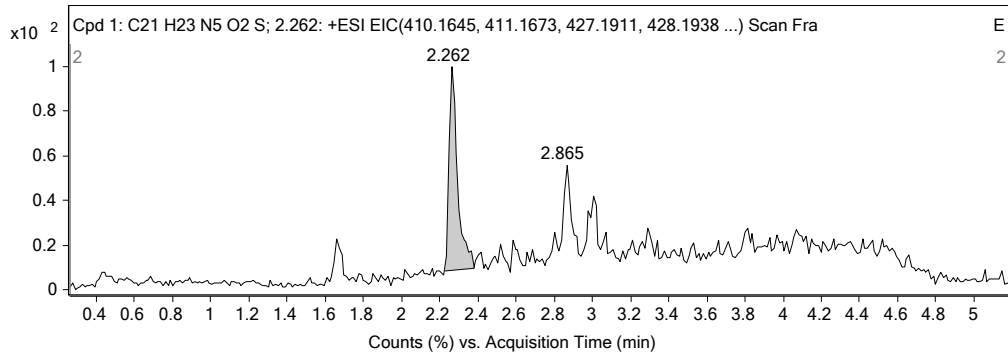

MS Zoomed Spectrum

11-(3-methoxy-3-methylbut-1-yn-1-yl)-5,6,7,8-tetrahydropyrimido[4',5':3,4]cyclohepta[1,2-b]indol-2-amine (20).

<sup>1</sup>H NMR

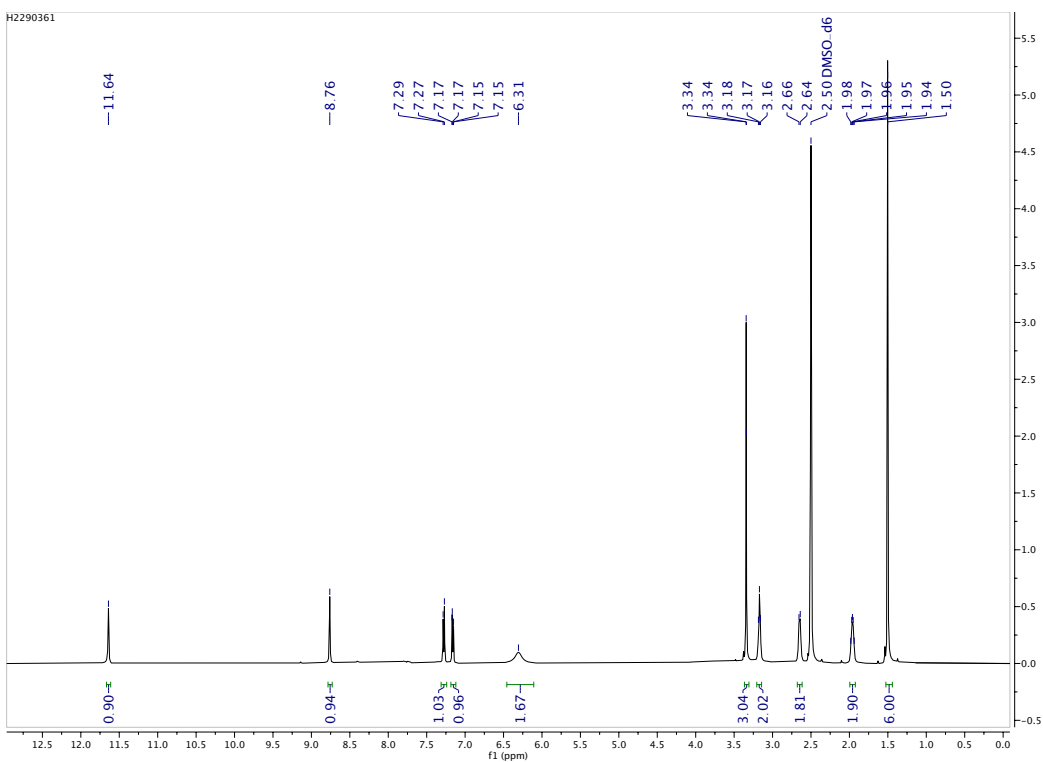

<sup>13</sup>C NMR

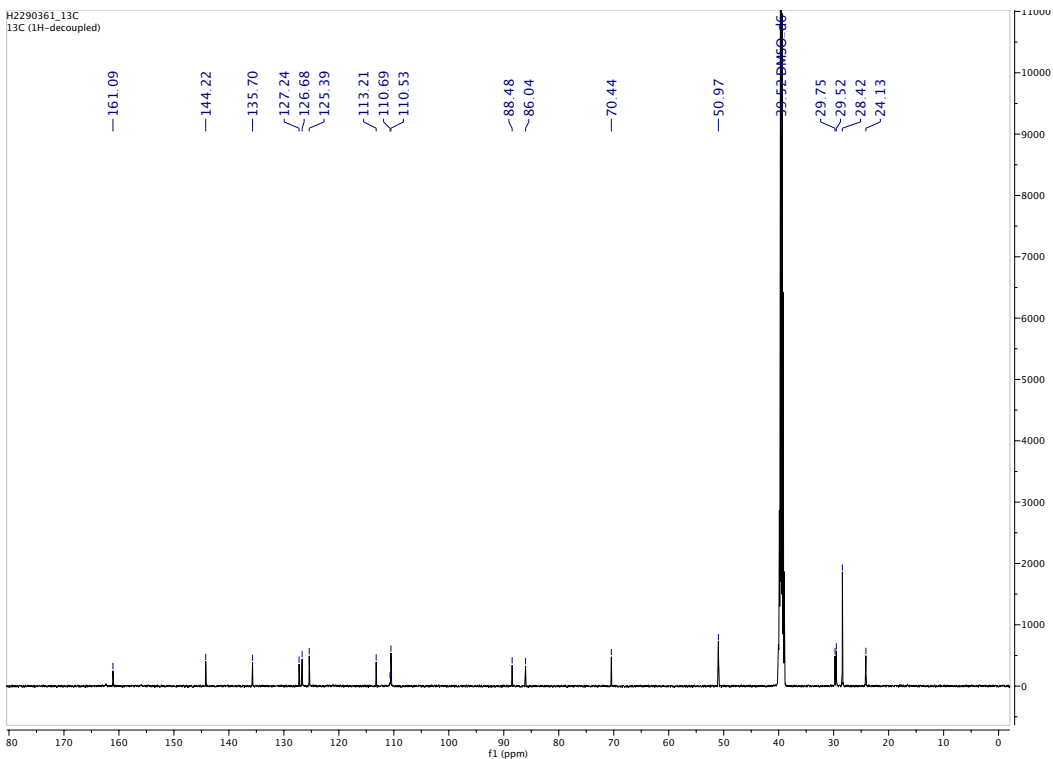

# LC Chromatogram

MaxPeak: 98.70%  
Ret\_Time: 2.208 min

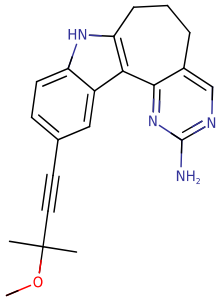

Mol Wt 346.43  
Exact Mass 346.21

| # | Time  | Area% |
|---|-------|-------|
| 1 | 2.170 | 1.30  |
| 2 | 2.208 | 98.70 |

## Q184058\$1

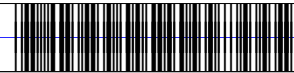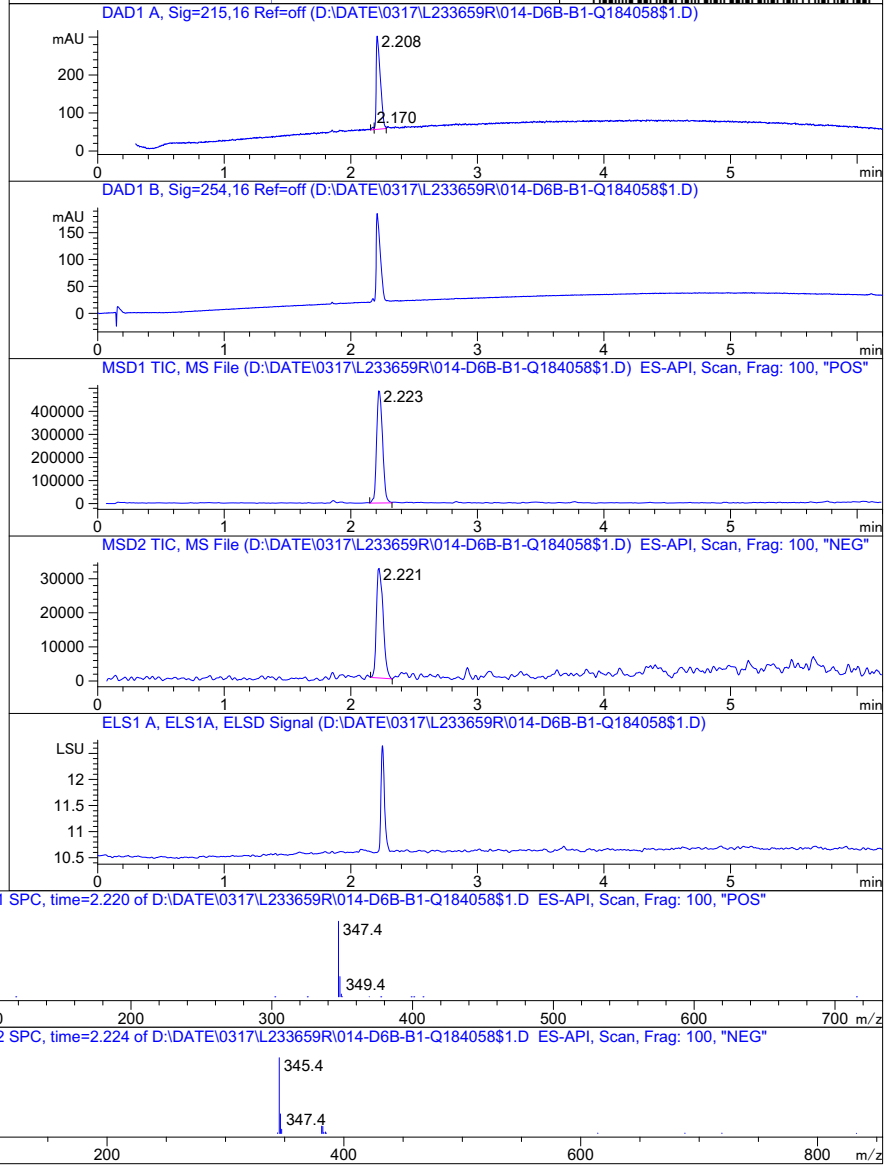

RT 2.223

RT 2.221

Target Compound Screening Report

|                                 |                                        |                               |                                                     |
|---------------------------------|----------------------------------------|-------------------------------|-----------------------------------------------------|
| <b>Data File</b>                | H2290361.d                             | <b>Sample Name</b>            | H2290361                                            |
| <b>Sample Type</b>              | Sample                                 | <b>Position</b>               | P1-B3                                               |
| <b>Instrument Name</b>          | Instrument 1                           | <b>User Name</b>              | Denis V.Bylina                                      |
| <b>Acq Method</b>               | Fast_Gradient_HRMS_pos_Lock_08272019.m | <b>Acquired Time</b>          | 5/7/2021 6:56:35 PM (UTC+03:00)                     |
| <b>IRM Calibration Status</b>   | Success                                | <b>DA Method</b>              | Fast_Gradient_HRMS_pos_Lock_08272019.m              |
| <b>Comment</b>                  |                                        |                               |                                                     |
| <b>Sample Group</b>             |                                        | <b>Info.</b>                  |                                                     |
| <b>MFC</b>                      | C21H22N4O                              | <b>Stream Name</b>            | LC 1                                                |
| <b>Acquisition Time (Local)</b> | 5/7/2021 6:56:35 PM (UTC+03:00)        | <b>Acquisition SW Version</b> | 6200 series TOF/6500 series Q-TOF B.08.00 (B8058.0) |
| <b>TOF Driver Version</b>       | 8.00.00                                | <b>TOF Firmware Version</b>   | 8.643                                               |
| <b>Tune Mass Range Max.</b>     | 1700                                   |                               |                                                     |

Compound Table

| Label                      | Tgt Score | Mass Error (ppm) | Tgt Formula  | Obs. RT | Ref. Mass | Obs. Mass |
|----------------------------|-----------|------------------|--------------|---------|-----------|-----------|
| Cpd 1: C21 H22 N4 O; 2.409 | 98.44     | -0.79            | C21 H22 N4 O | 2.409   | 346.1794  | 346.1791  |

| Obs. m/z | Obs. RT | Obs. Mass | Tgt Formula  | Tgt Mass | Tgt Mass Error (ppm) | RT Diff.        | Find Cpds Algorithm |
|----------|---------|-----------|--------------|----------|----------------------|-----------------|---------------------|
| 347.1863 | 2.409   | 346.1791  | C21 H22 N4 O | 346.1794 | -0.79                | Find By Formula |                     |

Compound Chromatograms

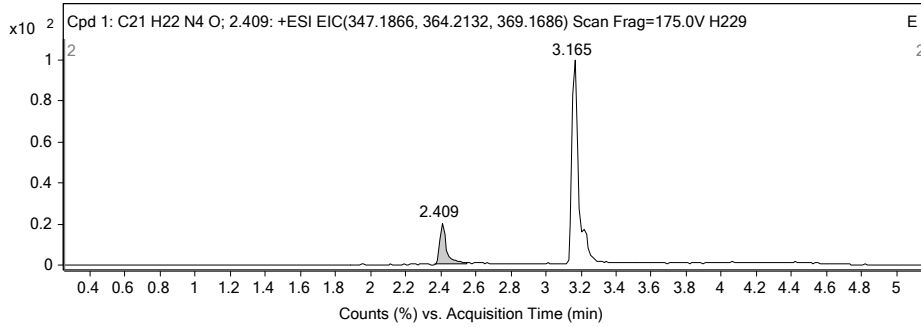

MS Zoomed Spectrum

4-(2-amino-5,6,7,8-tetrahydropyrimido[4',5':3,4]cyclohepta[1,2-b]indol-11-yl)but-3-yn-2-ol  
(21).

<sup>1</sup>H NMR

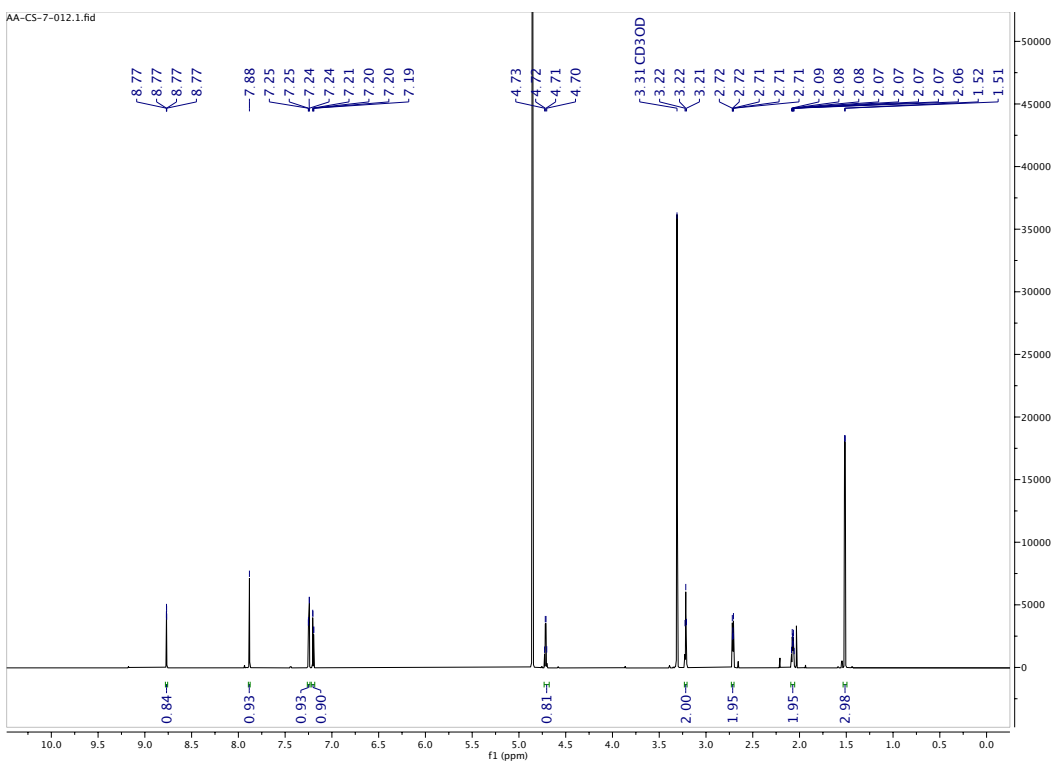

<sup>13</sup>C NMR

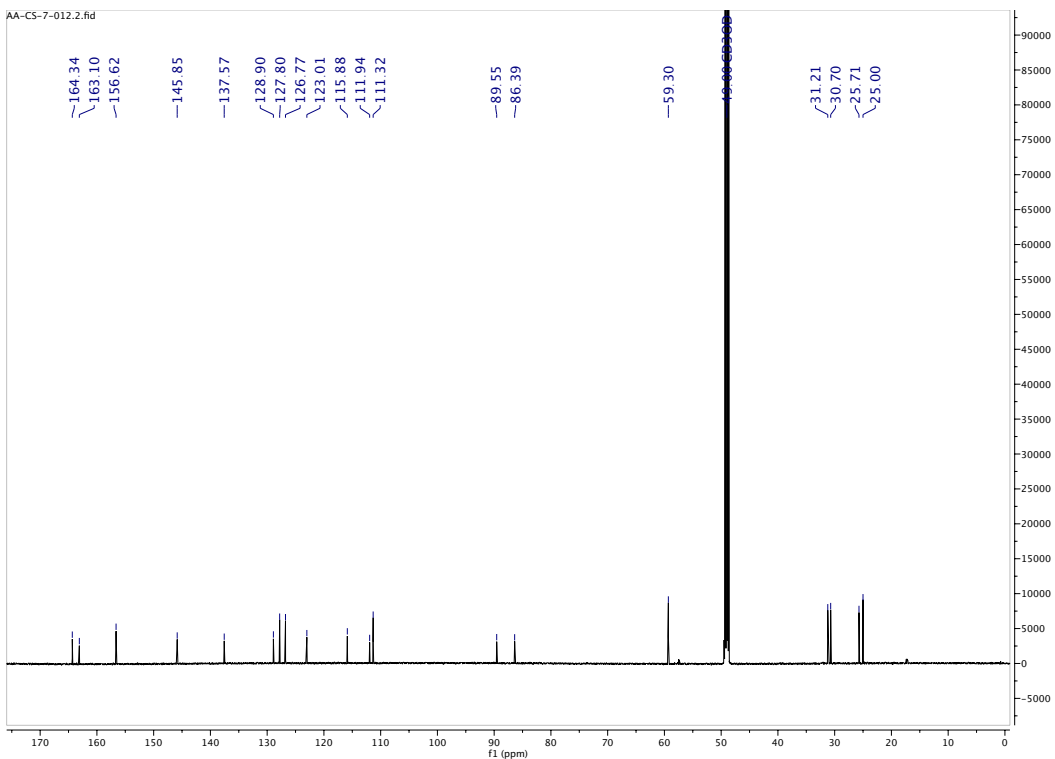

# LC Chromatogram

MaxPeak: 100.00%  
Ret\_Time: 0.748 min

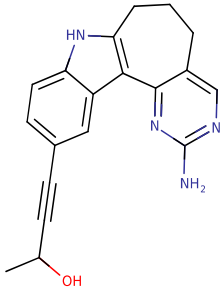

Mol Wt 318.37  
Exact Mass 318.17

| # | Time  | Area%  |
|---|-------|--------|
| 1 | 0.748 | 100.00 |

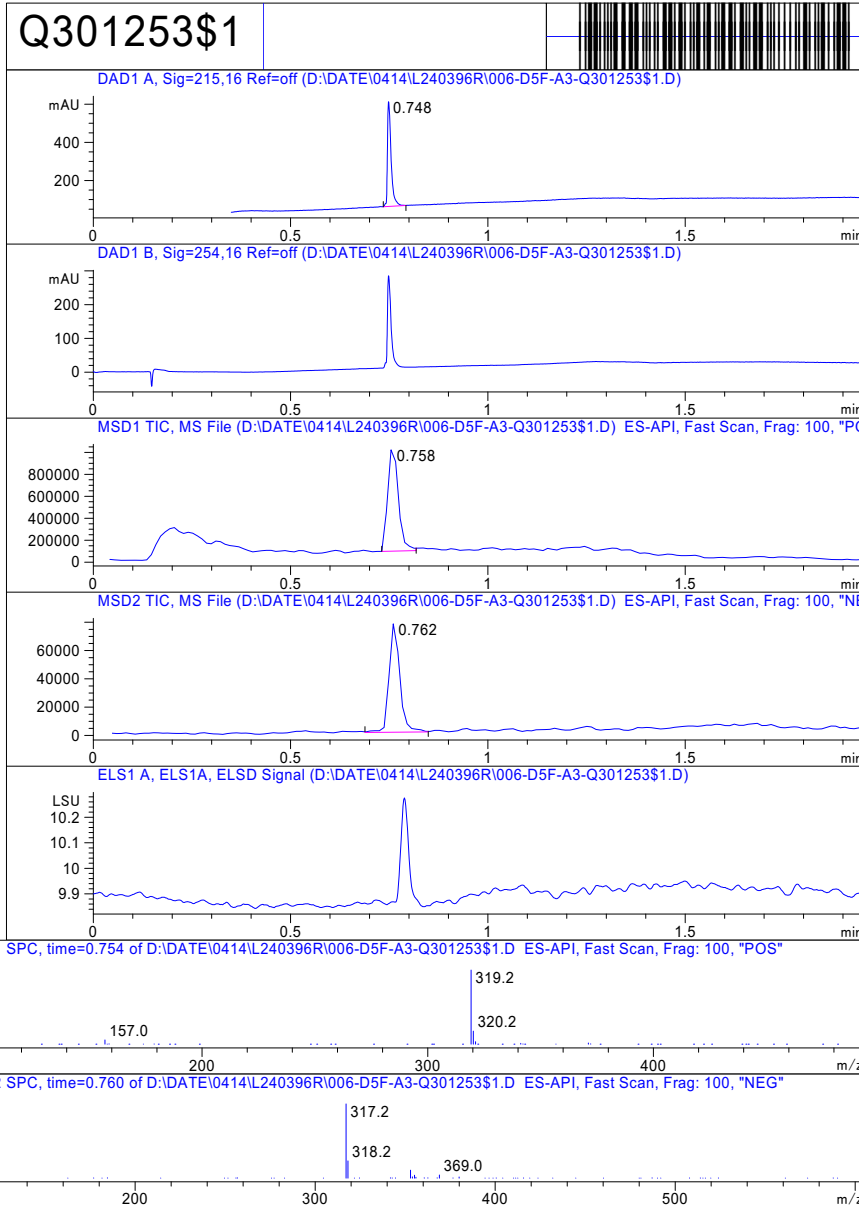

Inj.Date 4/14/2020

E

Acq. Method C:\Users\ -> ->



# HRMS

AA-7-12 #6-98 RT: 0.03-0.42 AV: 93 NL: 1.11E9  
T: FTMS + p ESI Full ms [150.0000-2000.0000]

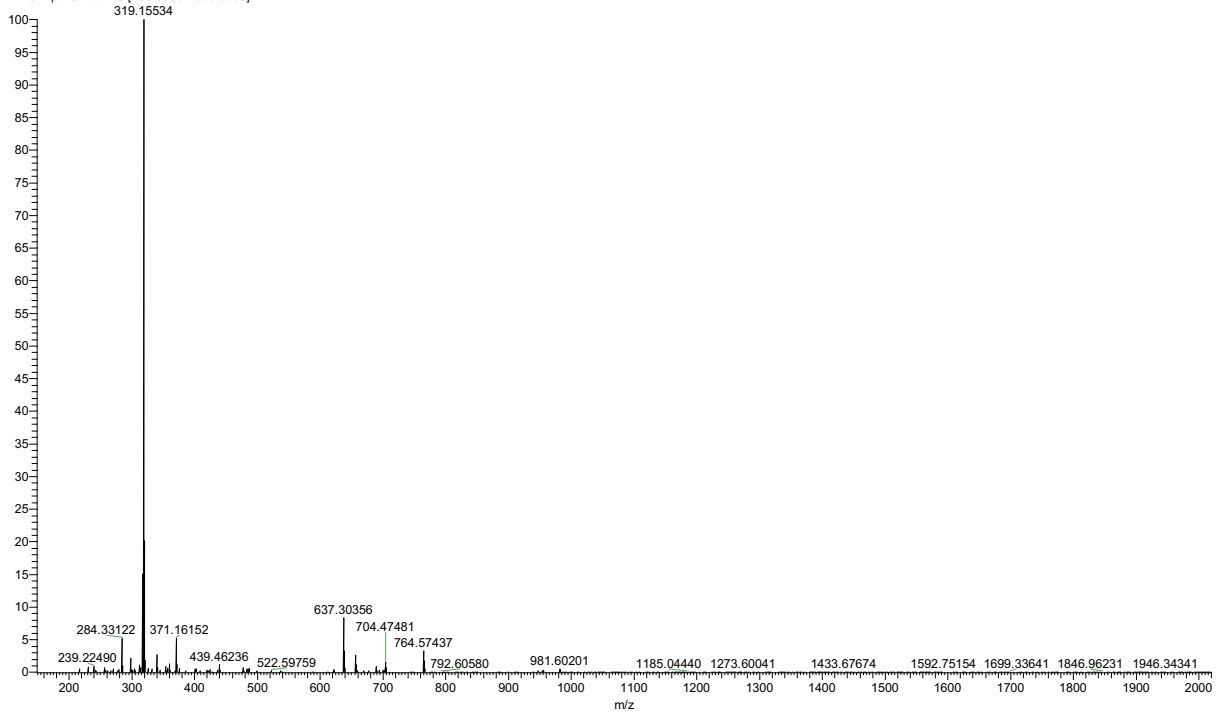

AA-7-12 #6-98 RT: 0.03-0.42 AV: 93 NL: 1.11E9  
T: FTMS + p ESI Full ms [150.0000-2000.0000]

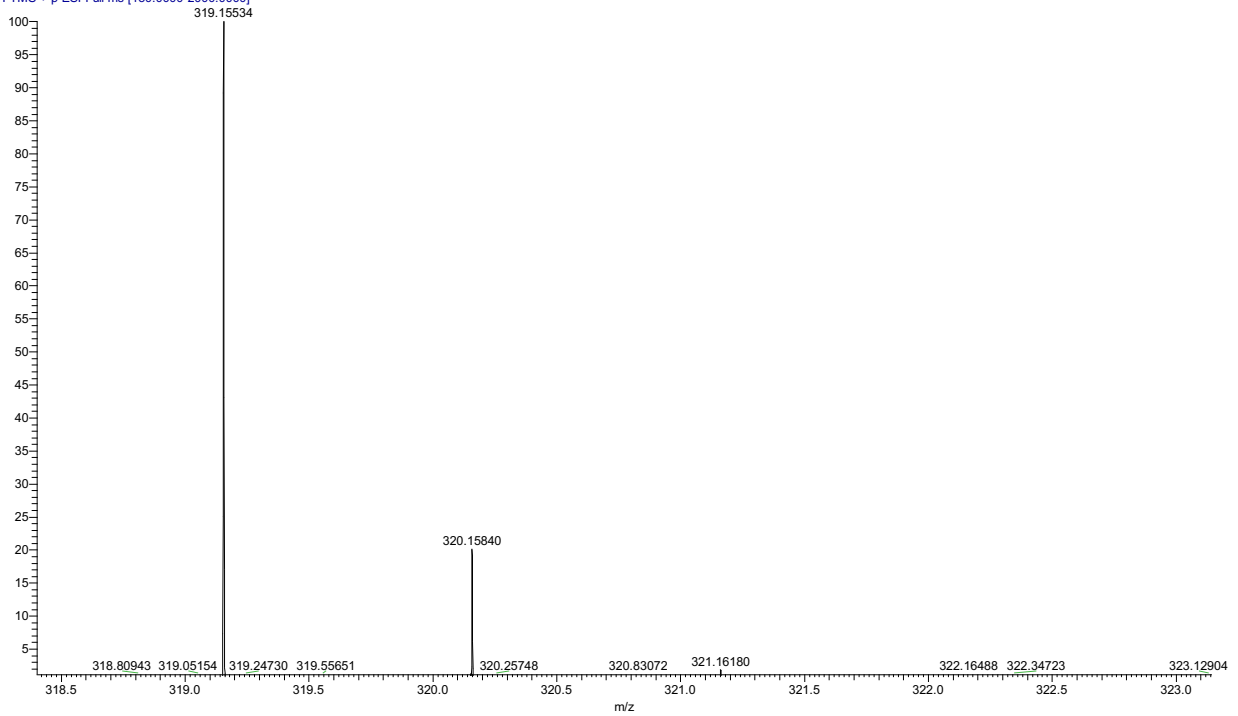

4-(2-amino-5,6,7,8-tetrahydropyrimido[4',5':3,4]cyclohepta[1,2-b]indol-11-yl)but-3-yn-1-ol  
(22).

<sup>1</sup>H NMR

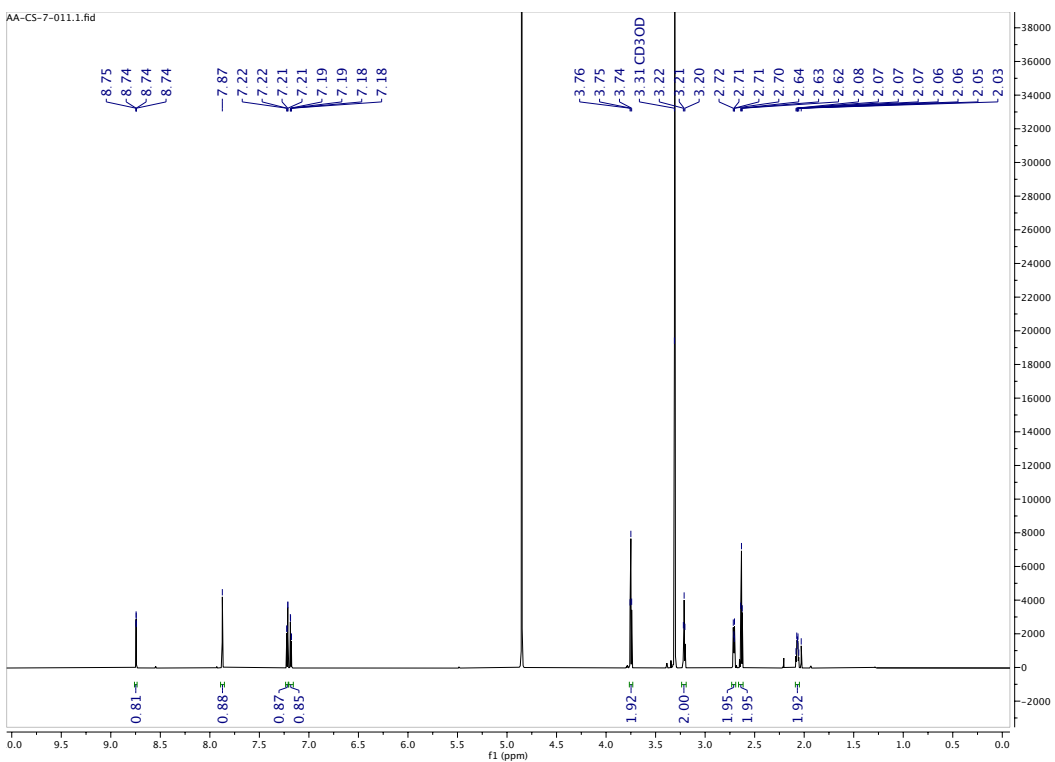

<sup>13</sup>C NMR

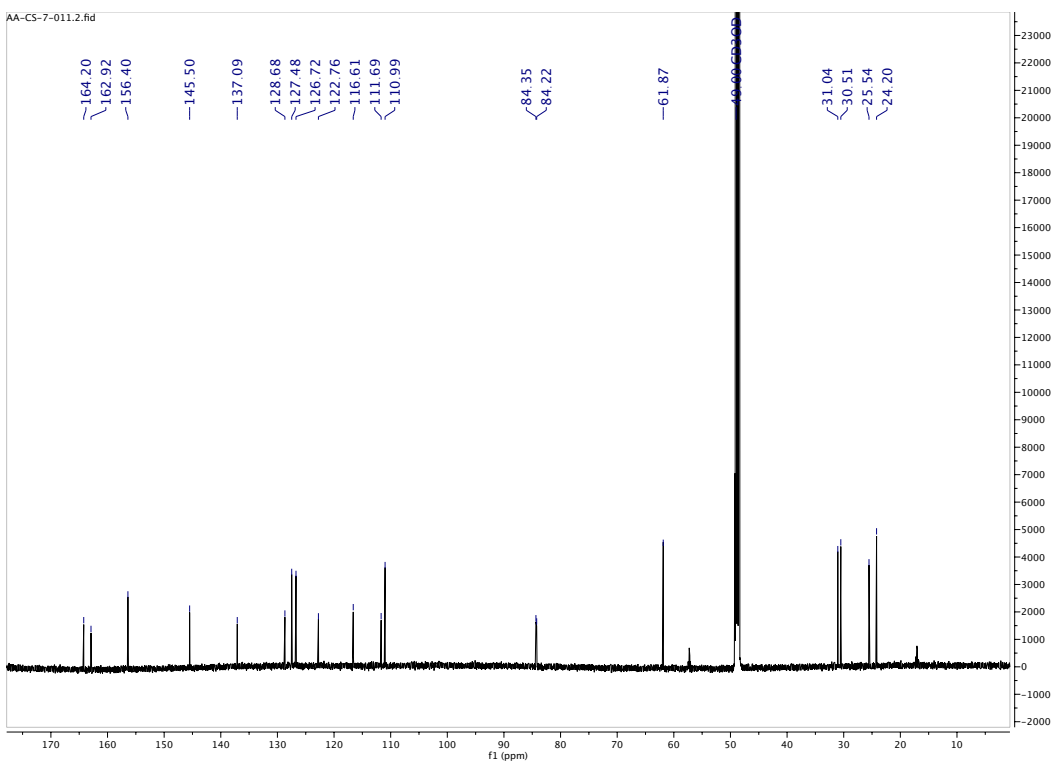

# LC Chromatogram

MaxPeak: 100.00%  
Ret\_Time: 0.731 min

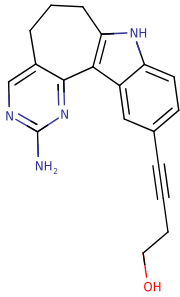

Mol Wt 318.37  
Exact Mass 318.17

| # | Time  | Area%  |
|---|-------|--------|
| 1 | 0.731 | 100.00 |

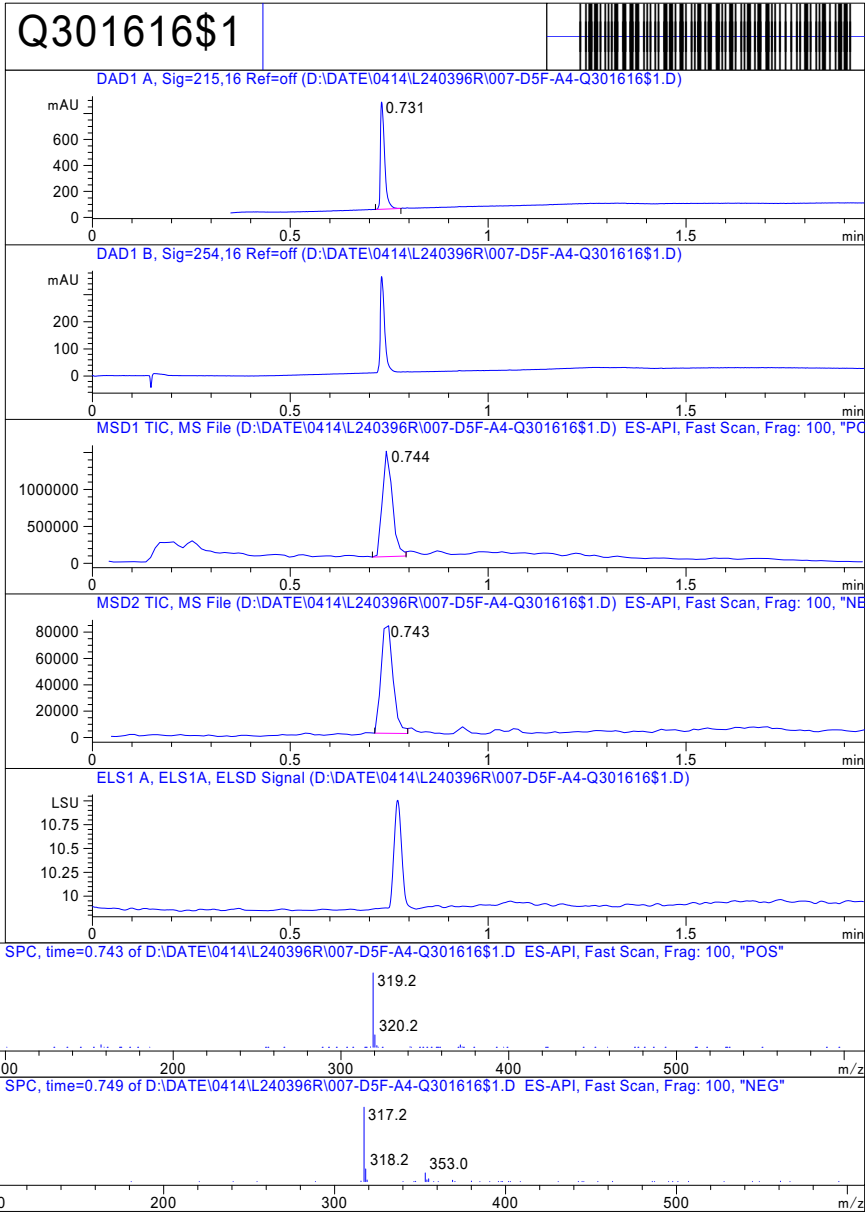

Inj.Date 4/14/2020

E

Acq. Method C:\Users\ -> ->

# HRMS

AA-7-11 #5-100 RT: 0.02-0.43 AV: 96 NL: 2.34E9  
T: FTMS + p ESI Full ms [150.0000-2000.0000]

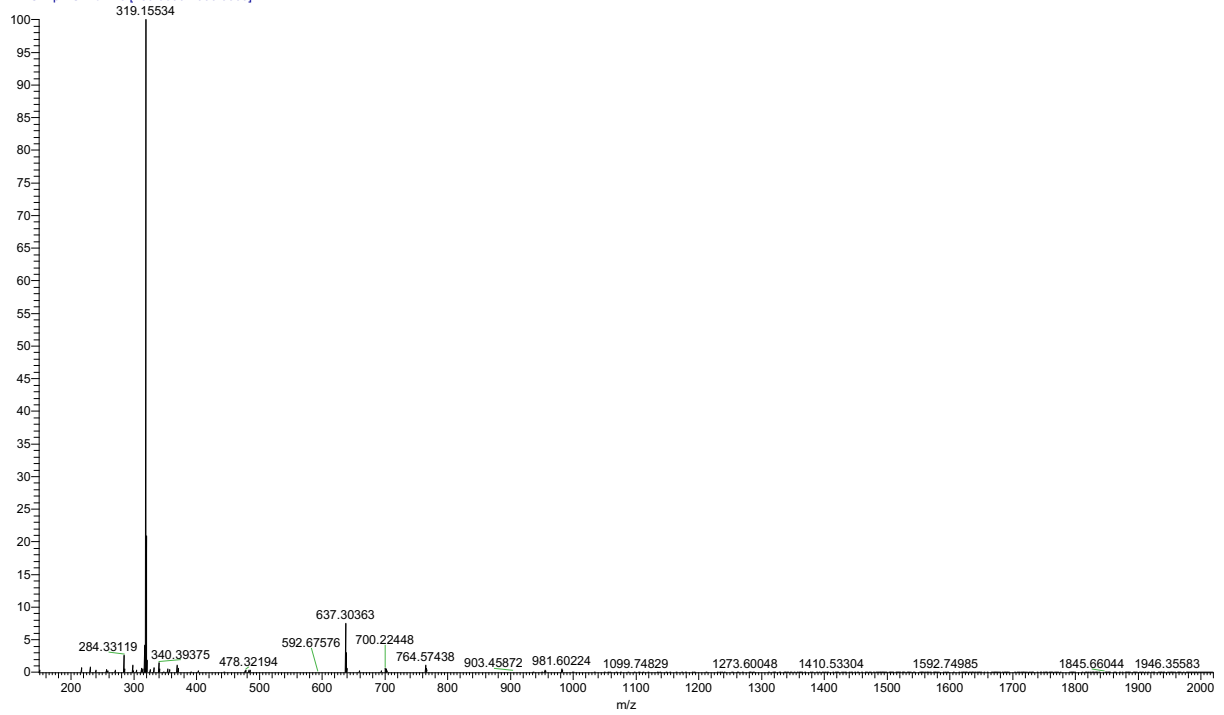

AA-7-11 #5-100 RT: 0.02-0.43 AV: 96 NL: 2.34E9  
T: FTMS + p ESI Full ms [150.0000-2000.0000]

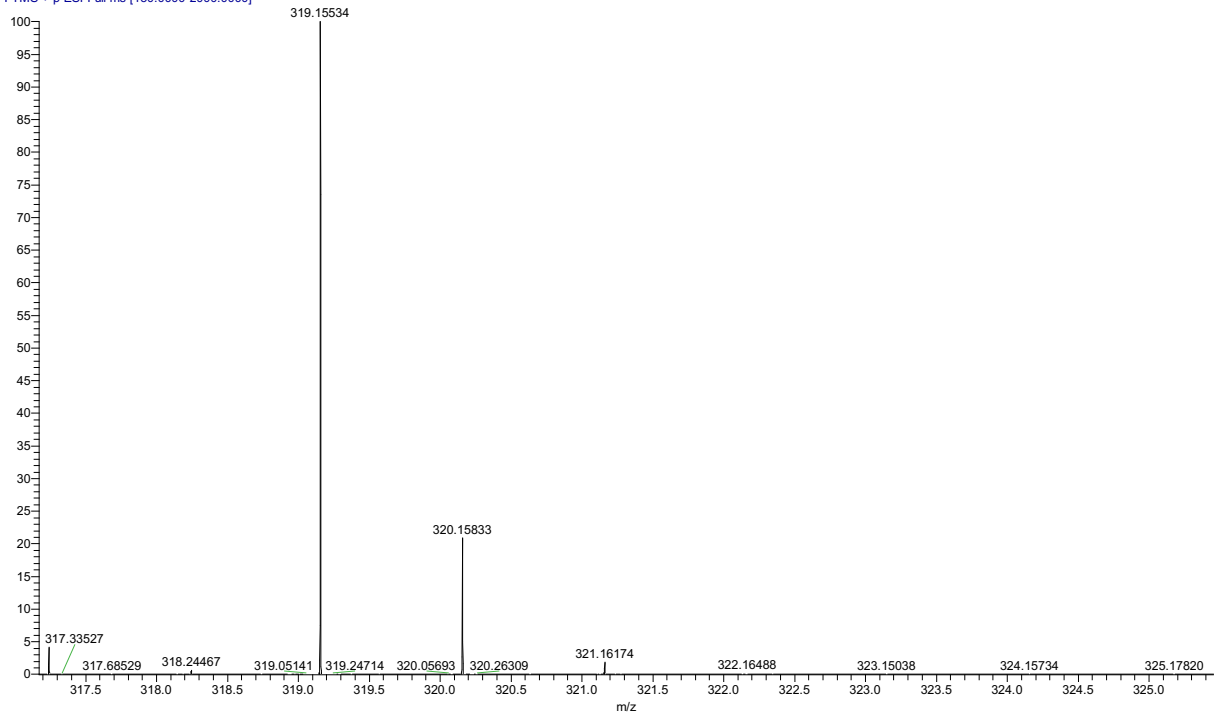

4-(2-amino-5,6,7,8-tetrahydropyrimido[4',5':3,4]cyclohepta[1,2-b]indol-11-yl)-2,2-dimethylbut-3-yn-1-ol (**23**).

<sup>1</sup>H NMR

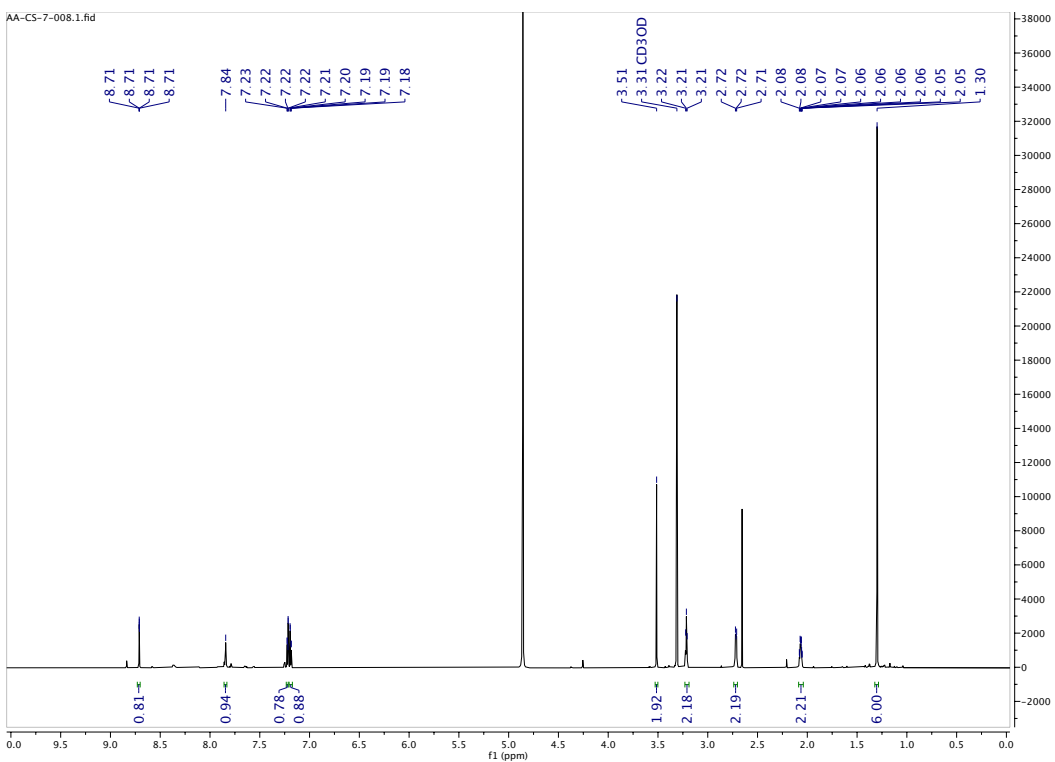

<sup>13</sup>C NMR

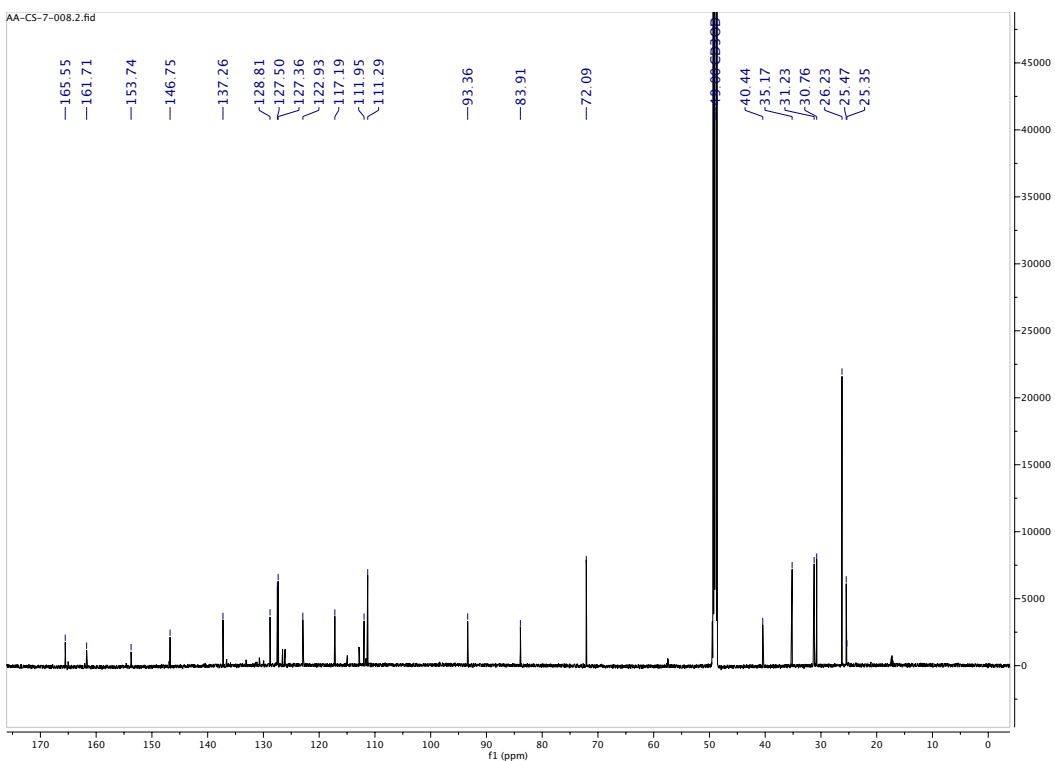

# LC Chromatogram

MaxPeak: 98.28%  
Ret\_Time: 0.964 min

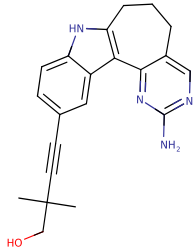

Mol Wt 346.43

Exact Mass 346.21

| # | Time  | Area% |
|---|-------|-------|
| 1 | 0.964 | 98.28 |
| 2 | 1.251 | 1.72  |

Q158596\$2

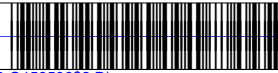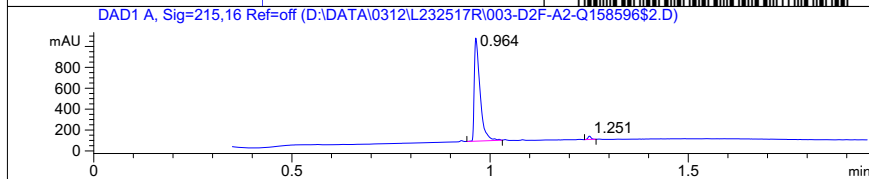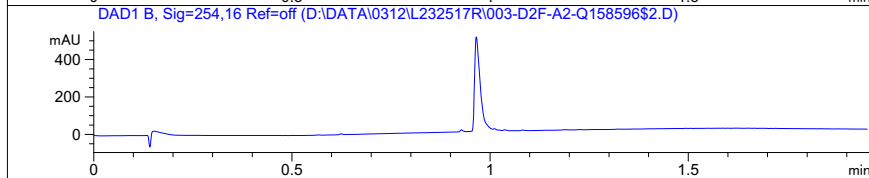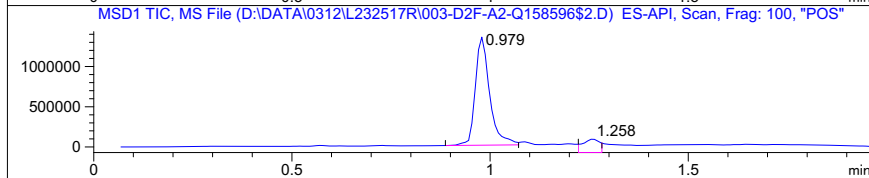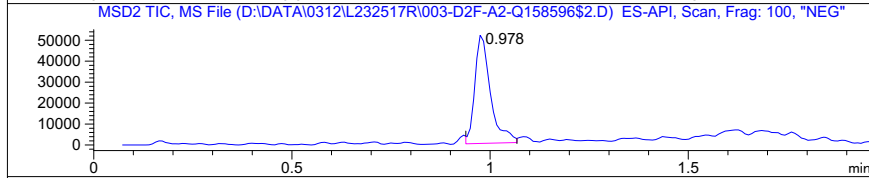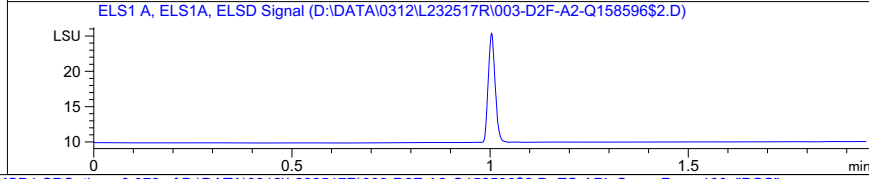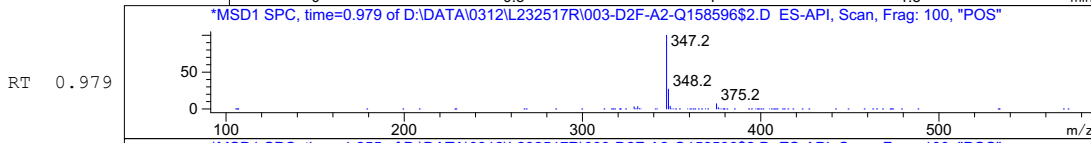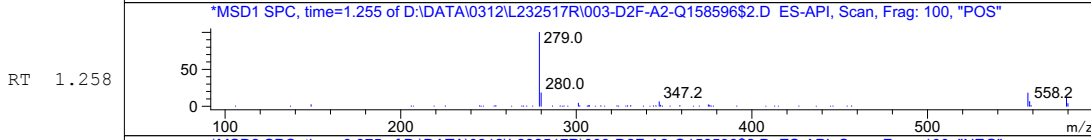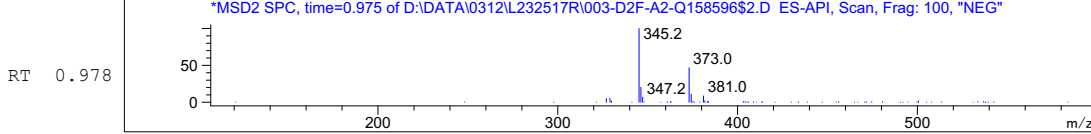

# HRMS

AA-7-8 #25-100 RT: 0.11-0.43 AV: 76 NL: 1.11E9  
T: FTMS + p ESI Full ms [150.0000-2000.0000]

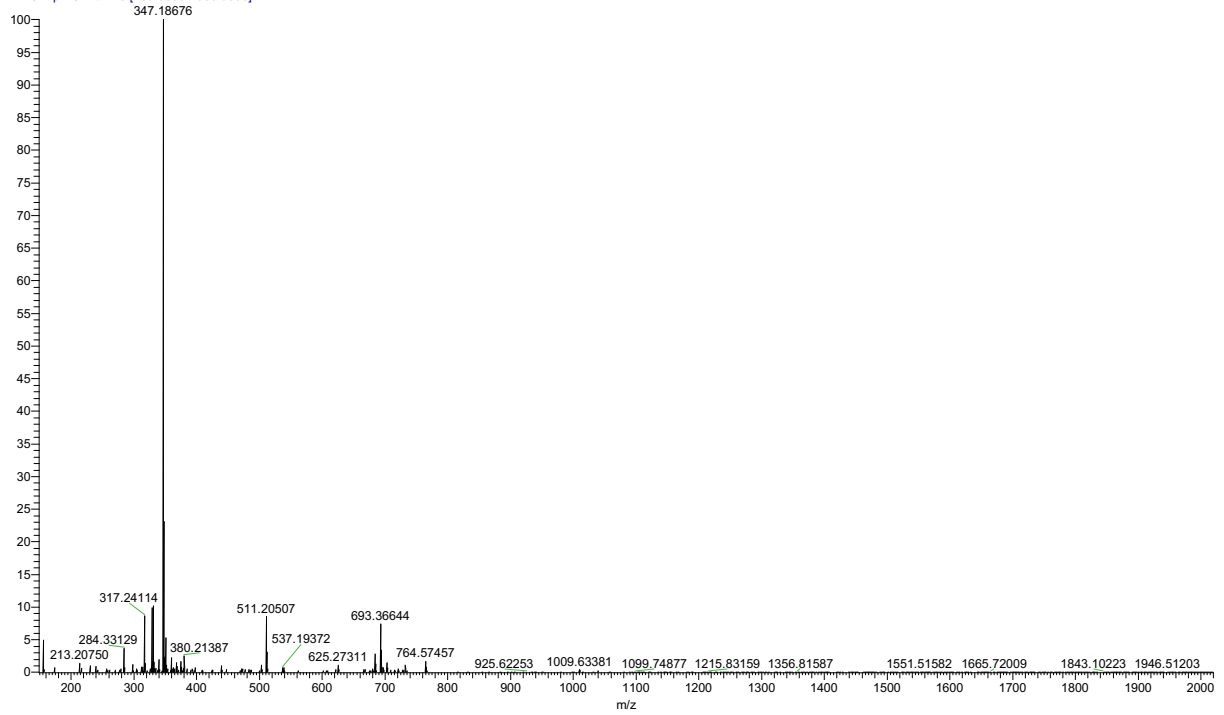

AA-7-8 #25-100 RT: 0.11-0.43 AV: 76 NL: 1.11E9  
T: FTMS + p ESI Full ms [150.0000-2000.0000]

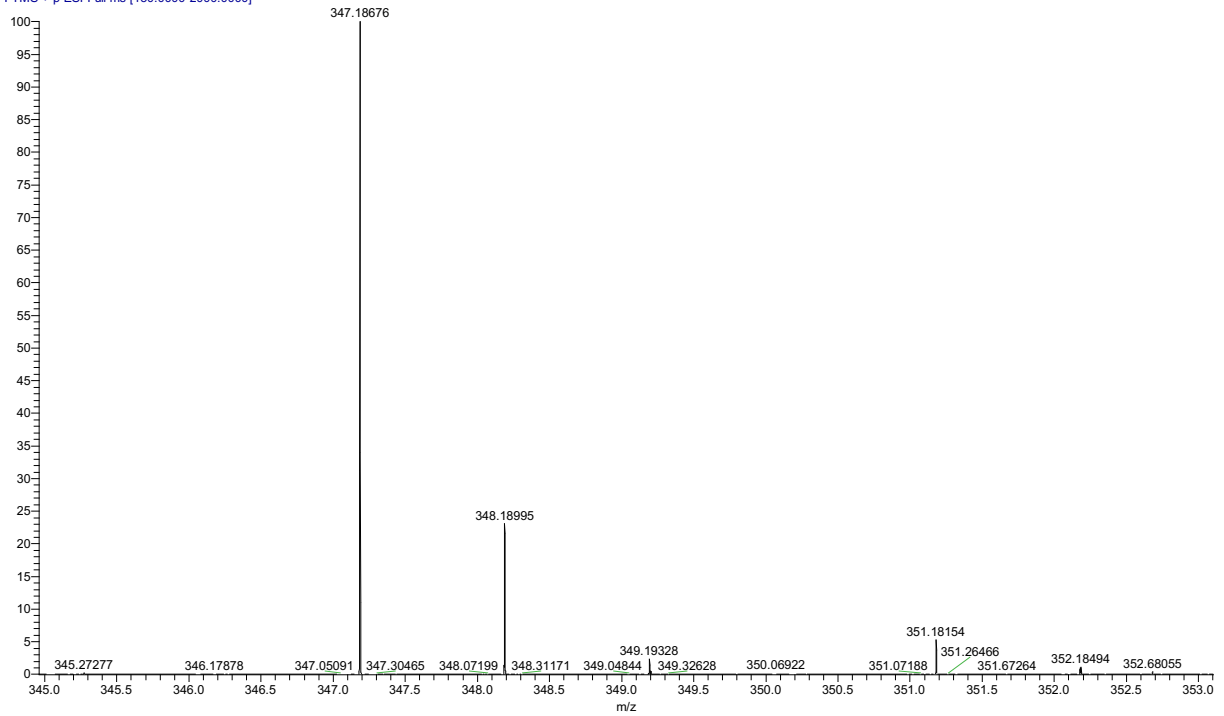

5-(2-amino-5,6,7,8-tetrahydropyrimido[4',5':3,4]cyclohepta[1,2-b]indol-11-yl)-2-methylpent-4-yn-2-ol (24).

<sup>1</sup>H NMR

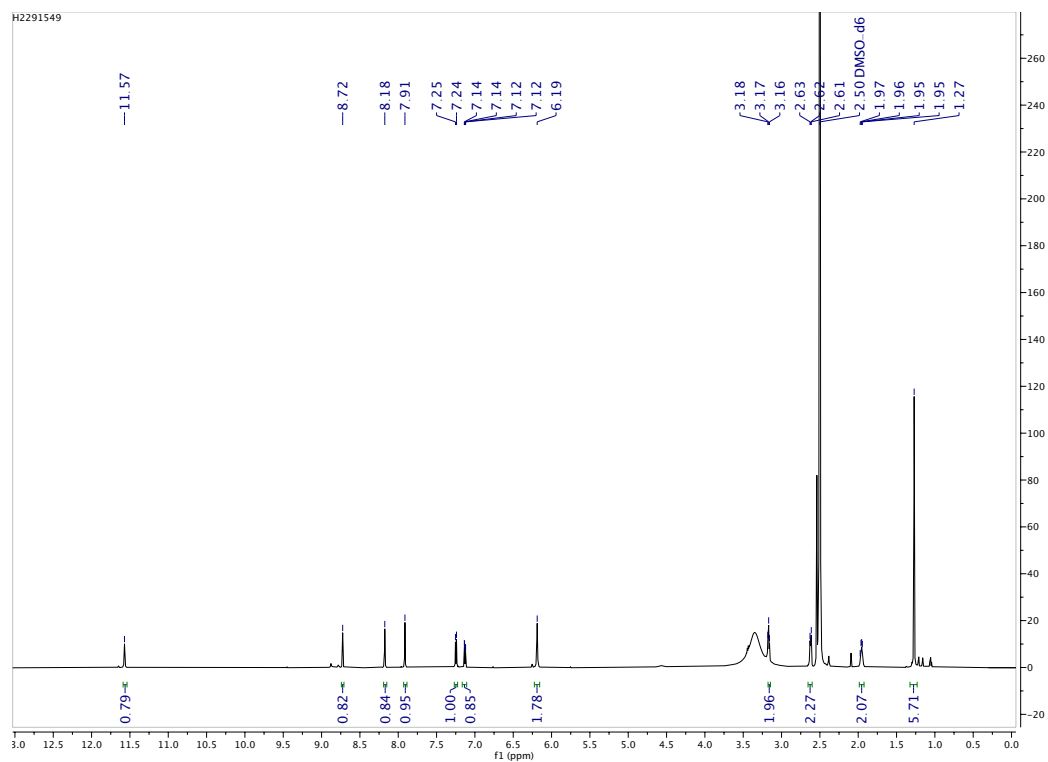

<sup>13</sup>C NMR

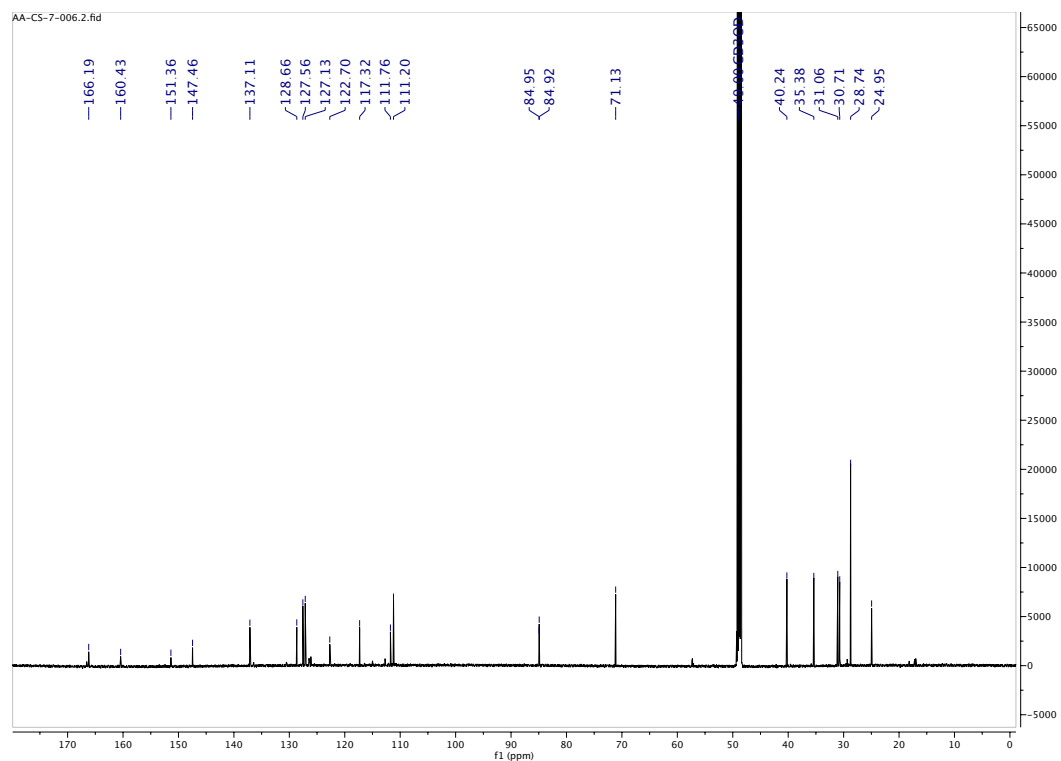



# LC Chromatogram

MaxPeak: 95.86%  
Ret\_Time: 0.749 min

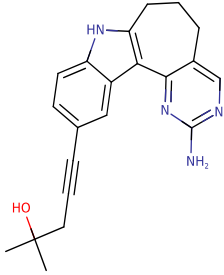

Mol Wt 346.43  
Exact Mass 346.21

| # | Time  | Area% |
|---|-------|-------|
| 1 | 0.712 | 1.50  |
| 2 | 0.749 | 95.86 |
| 3 | 0.801 | 2.64  |

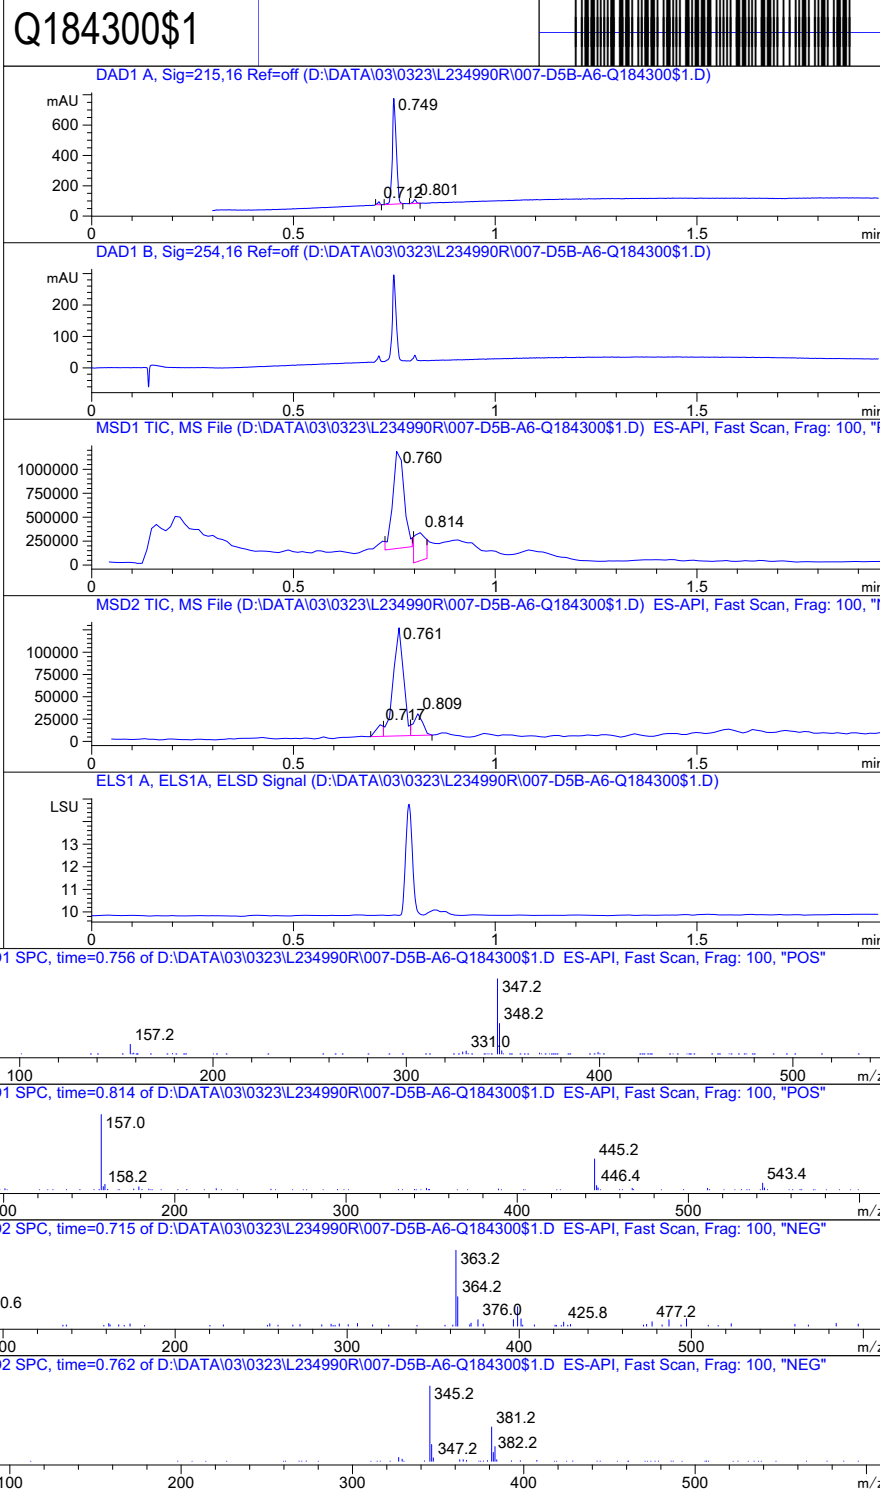

Inj.Date 3/23/2020

LT

Acq. Method C:\Users\ -> ->

# HRMS

## Target Compound Screening Report

|                                 |                                        |                               |                                                     |
|---------------------------------|----------------------------------------|-------------------------------|-----------------------------------------------------|
| <b>Data File</b>                | H2291549.d                             | <b>Sample Name</b>            | H2291549                                            |
| <b>Sample Type</b>              | Sample                                 | <b>Position</b>               | P1-D2                                               |
| <b>Instrument Name</b>          | Instrument 1                           | <b>User Name</b>              | Denis V.Bylina                                      |
| <b>Acq Method</b>               | Fast_Gradient_HRMS_pos_Lock_08272019.m | <b>Acquired Time</b>          | 5/7/2021 7:51:06 PM (UTC+03:00)                     |
| <b>IRM Calibration Status</b>   | Success                                | <b>DA Method</b>              | Fast_Gradient_HRMS_pos_Lock_08272019.m              |
| <b>Comment</b>                  |                                        |                               |                                                     |
| <b>Sample Group</b>             |                                        | <b>Info.</b>                  |                                                     |
| <b>MFC</b>                      | C21H22N4O                              | <b>Stream Name</b>            | LC 1                                                |
| <b>Acquisition Time (Local)</b> | 5/7/2021 7:51:06 PM (UTC+03:00)        | <b>Acquisition SW Version</b> | 6200 series TOF/6500 series Q-TOF B.08.00 (B8058.0) |
| <b>TOF Driver Version</b>       | 8.00.00                                | <b>TOF Firmware Version</b>   | 8.643                                               |
| <b>Tune Mass Range Max.</b>     | 1700                                   |                               |                                                     |

### Compound Table

| Label                      | Tgt Score | Mass Error (ppm) | Tgt Formula  | Obs. RT | Ref. Mass | Obs. Mass |
|----------------------------|-----------|------------------|--------------|---------|-----------|-----------|
| Cpd 2: C21 H22 N4 O; 2.291 | 97.59     | -0.91            | C21 H22 N4 O | 2.291   | 346.1794  | 346.179   |
| Cpd 1: C21 H22 N4 O; 2.419 | 61.78     | 2                | C21 H22 N4 O | 2.419   | 346.1794  | 346.1801  |

| Obs. m/z | Obs. RT | Obs. Mass | Tgt Formula  | Tgt Mass | Tgt Mass Error (ppm) | RT Diff.        | Find Cpds Algorithm |
|----------|---------|-----------|--------------|----------|----------------------|-----------------|---------------------|
| 347.1865 | 2.291   | 346.179   | C21 H22 N4 O | 346.1794 | -0.91                | Find By Formula |                     |

### Compound Chromatograms

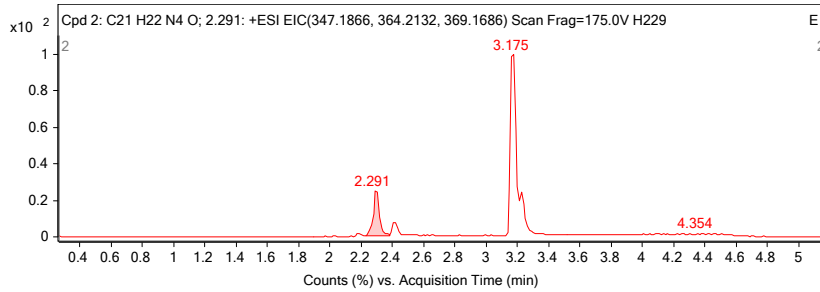

### MS Zoomed Spectrum

*1-(2-amino-5,6,7,8-tetrahydropyrimido[4',5':3,4]cyclohepta[1,2-b]indol-11-yl)-3-methylpent-1-yn-3-ol (25).*

**<sup>1</sup>H NMR**

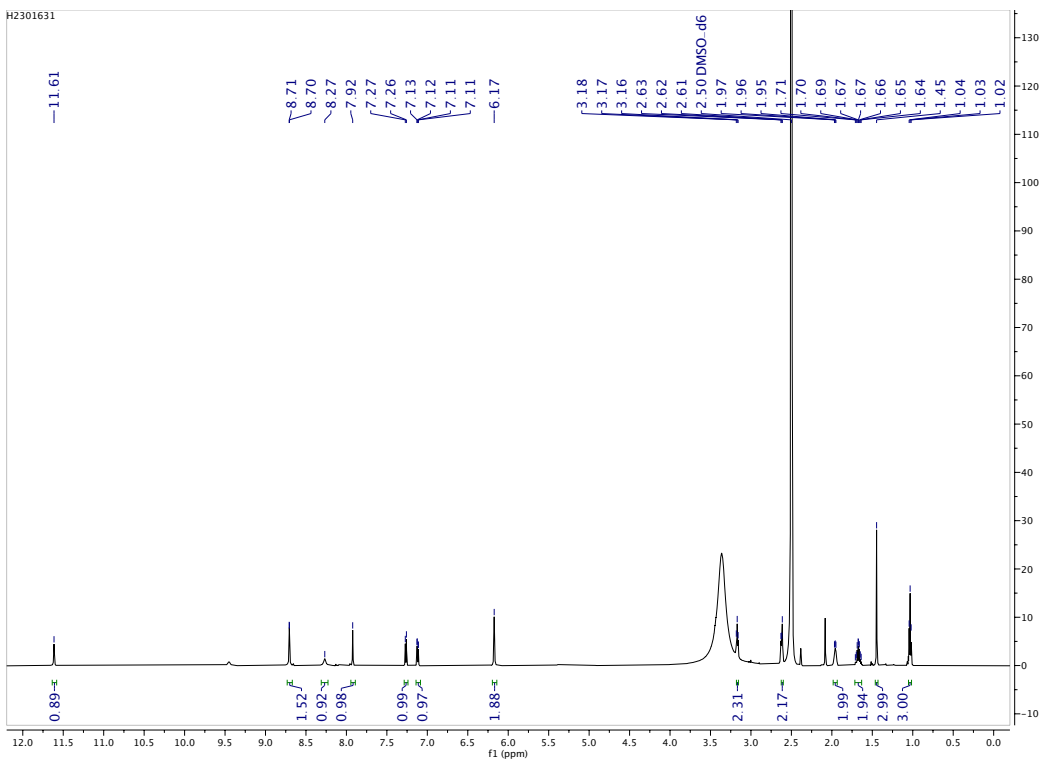

**<sup>13</sup>C NMR**

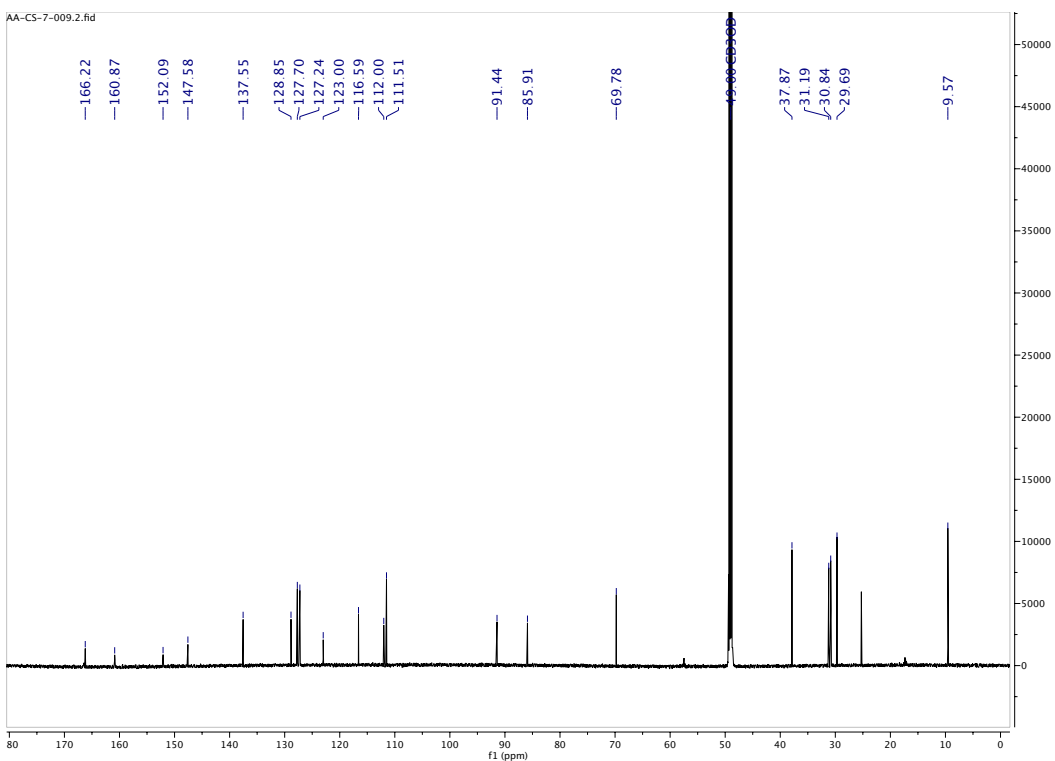

# LC Chromatogram

MaxPeak: 100.00%  
Ret\_Time: 2.135 min

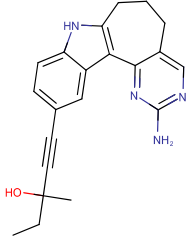

Mol Wt 346.43  
Exact Mass 346.21

| # | Time  | Area%  |
|---|-------|--------|
| 1 | 2.135 | 100.00 |

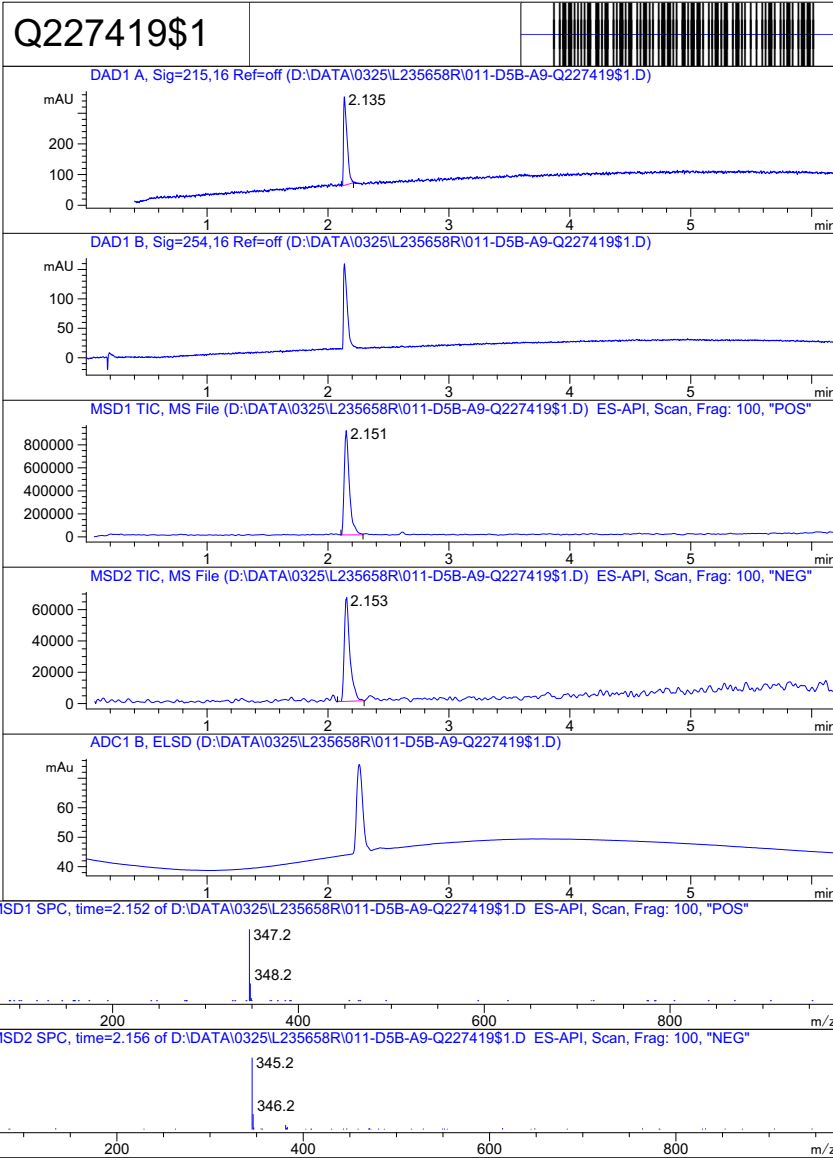

RT 2.151

RT 2.153

Inj.Date 3/25/2020

OA

-10-

Acq. Method C:\Chem32\ -> ->

Target Compound Screening Report

|                                 |                                        |                               |                                                     |
|---------------------------------|----------------------------------------|-------------------------------|-----------------------------------------------------|
| <b>Data File</b>                | 5-2.d                                  | <b>Sample Name</b>            | EQNO                                                |
| <b>Sample Type</b>              | Sample                                 | <b>Position</b>               | P1-A5                                               |
| <b>Instrument Name</b>          | Instrument 1                           | <b>User Name</b>              | Denis V.Bylina                                      |
| <b>Acq Method</b>               | Fast_Gradient_HRMS_pos_Lock_08272019.m | <b>Acquired Time</b>          | 5/18/2021 11:13:32 AM (UTC+03:00)                   |
| <b>IRM Calibration Status</b>   | Success                                | <b>DA Method</b>              | QualDAMethod.m                                      |
| <b>Comment</b>                  |                                        |                               |                                                     |
| <b>Sample Group</b>             |                                        | <b>Info.</b>                  |                                                     |
| <b>MFC</b>                      | C21H22N4O                              | <b>Stream Name</b>            | LC 1                                                |
| <b>Acquisition Time (Local)</b> | 5/18/2021 11:13:32 AM (UTC+03:00)      | <b>Acquisition SW Version</b> | 6200 series TOF/6500 series Q-TOF B.08.00 (B8058.0) |
| <b>TOF Driver Version</b>       | 8.00.00                                | <b>TOF Firmware Version</b>   | 8.643                                               |
| <b>Tune Mass Range Max.</b>     | 1700                                   |                               |                                                     |

Compound Table

| Label                      | Tgt Score | Mass Error (ppm) | Tgt Formula  | Obs. RT | Ref. Mass | Obs. Mass |
|----------------------------|-----------|------------------|--------------|---------|-----------|-----------|
| Cpd 1: C21 H22 N4 O; 2.329 | 95.9      | -1.66            | C21 H22 N4 O | 2.329   | 346.1794  | 346.1788  |

| Obs. m/z | Obs. RT | Obs. Mass | Tgt Formula  | Tgt Mass | Tgt Mass Error (ppm) | RT Diff.        | Find Cpsd Algorithm |
|----------|---------|-----------|--------------|----------|----------------------|-----------------|---------------------|
| 347.186  | 2.329   | 346.1788  | C21 H22 N4 O | 346.1794 | -1.66                | Find By Formula |                     |

Compound Chromatograms

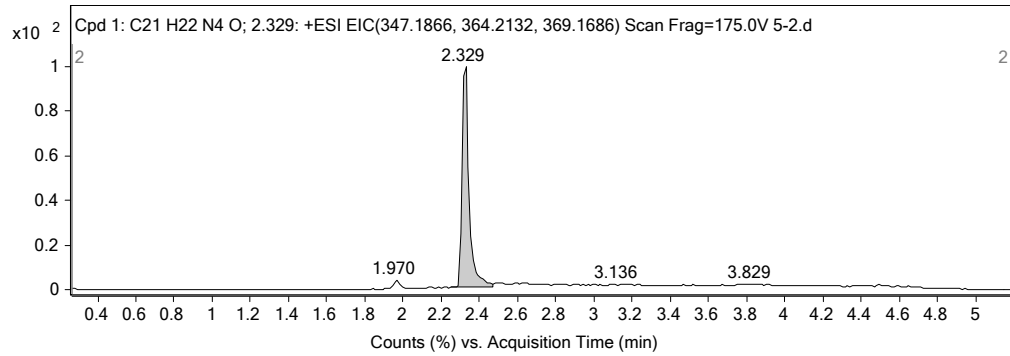

MS Zoomed Spectrum

*1-(2-amino-5,6,7,8-tetrahydropyrimido[4',5':3,4]cyclohepta[1,2-b]indol-11-yl)-3-ethylpent-1-yn-3-ol (26).*

**<sup>1</sup>H NMR**

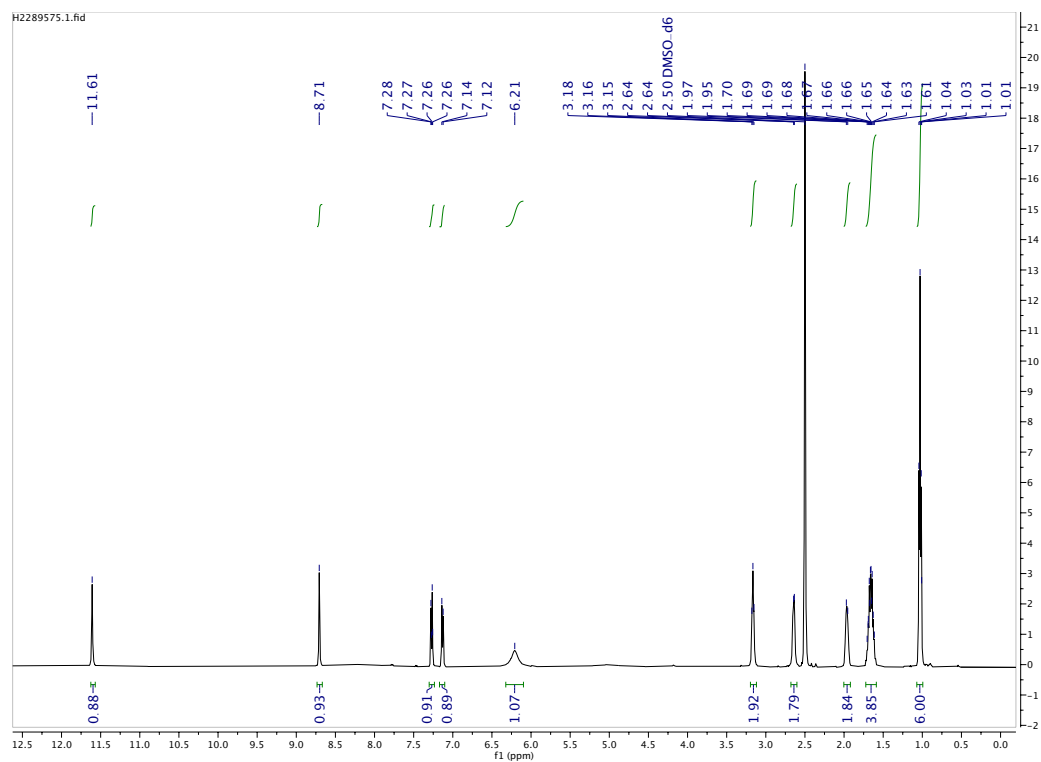

**<sup>13</sup>C NMR**

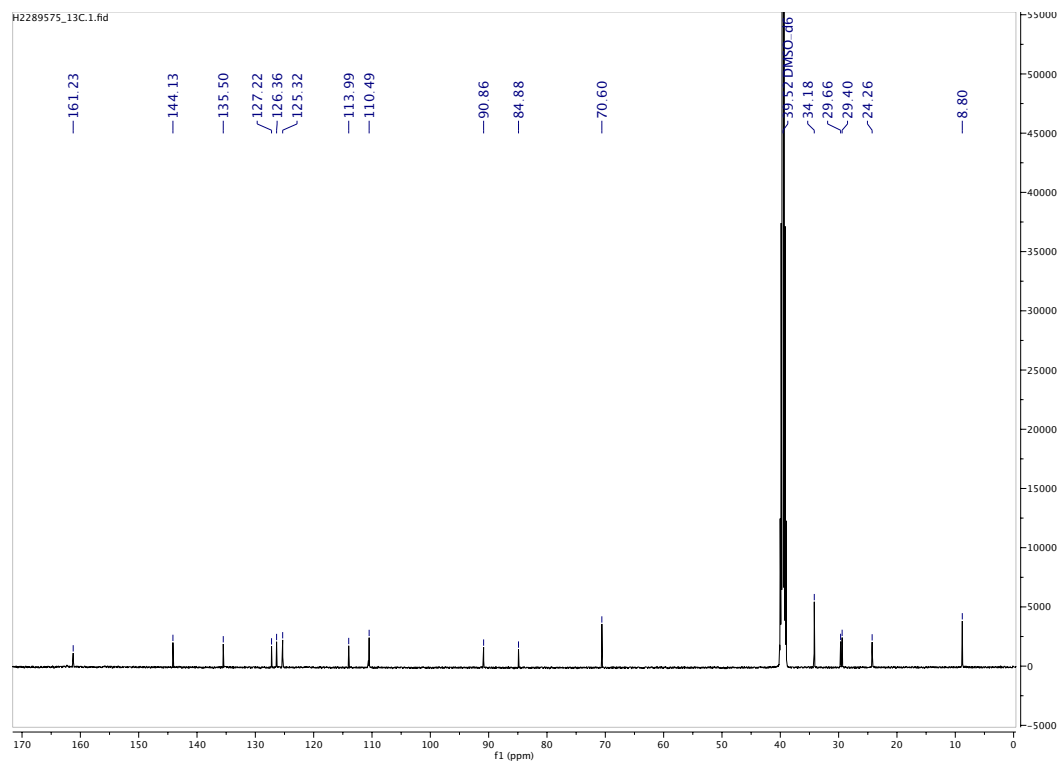

# LC Chromatogram

MaxPeak: 100.00%  
Ret\_Time: 2.443 min

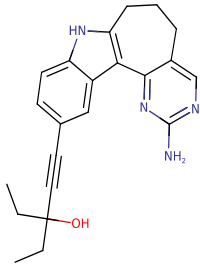

Mol Wt 360.45  
Exact Mass 360.23

| # | Time  | Area%  |
|---|-------|--------|
| 1 | 2.443 | 100.00 |

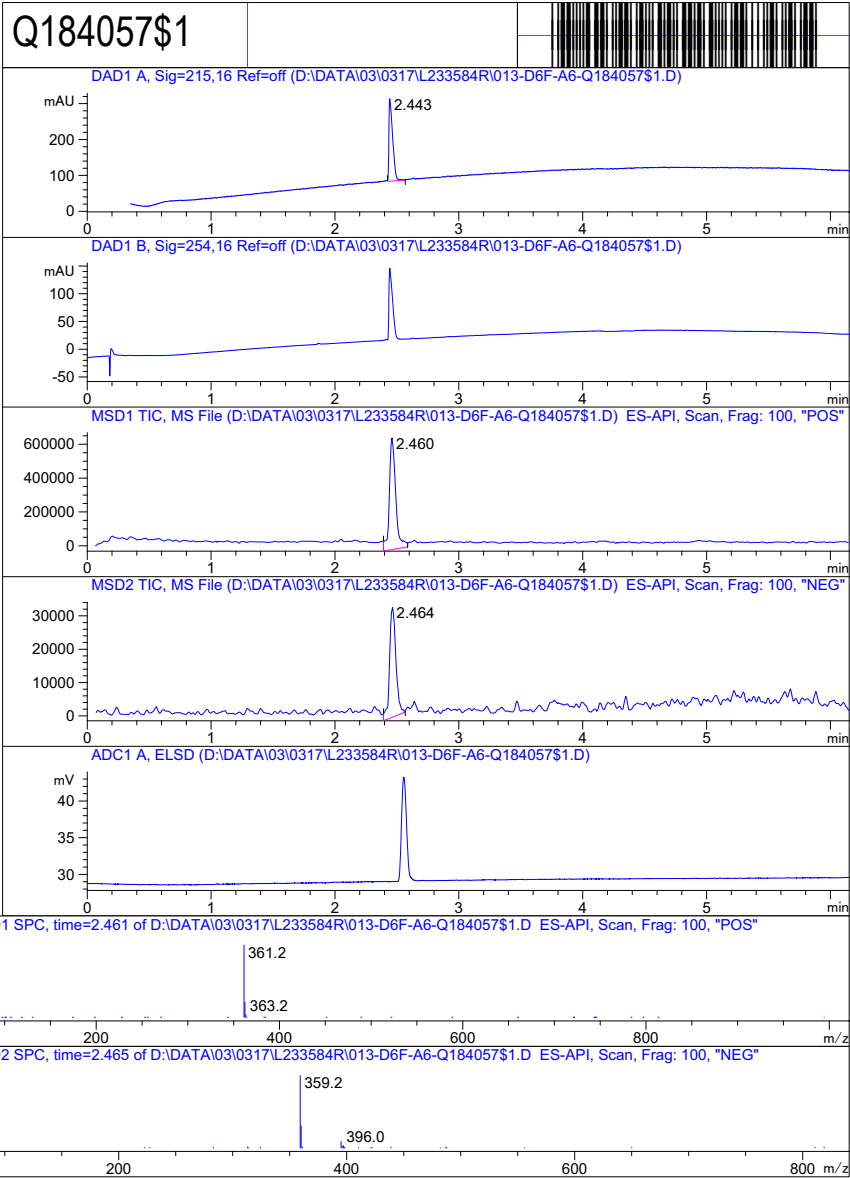

Target Compound Screening Report

|                                 |                                        |                               |                                                     |
|---------------------------------|----------------------------------------|-------------------------------|-----------------------------------------------------|
| <b>Data File</b>                | H2289575.d                             | <b>Sample Name</b>            | H2289575                                            |
| <b>Sample Type</b>              | Sample                                 | <b>Position</b>               | P1-A1                                               |
| <b>Instrument Name</b>          | Instrument 1                           | <b>User Name</b>              | Denis V.Bylina                                      |
| <b>Acq Method</b>               | Fast_Gradient_HRMS_pos_Lock_08272019.m | <b>Acquired Time</b>          | 5/7/2021 5:49:49 PM (UTC+03:00)                     |
| <b>IRM Calibration Status</b>   | Success                                | <b>DA Method</b>              | Fast_Gradient_HRMS_pos_Lock_08272019.m              |
| <b>Comment</b>                  |                                        |                               |                                                     |
| <b>Sample Group</b>             |                                        | <b>Info.</b>                  |                                                     |
| <b>MFC</b>                      | C22H24N4O                              | <b>Stream Name</b>            | LC 1                                                |
| <b>Acquisition Time (Local)</b> | 5/7/2021 5:49:49 PM (UTC+03:00)        | <b>Acquisition SW Version</b> | 6200 series TOF/6500 series Q-TOF B.08.00 (B8058.0) |
| <b>TOF Driver Version</b>       | 8.00.00                                | <b>TOF Firmware Version</b>   | 8.643                                               |
| <b>Tune Mass Range Max.</b>     | 1700                                   |                               |                                                     |

Compound Table

| Label                      | Tgt Score | Mass Error (ppm) | Tgt Formula  | Obs. RT | Ref. Mass | Obs. Mass |
|----------------------------|-----------|------------------|--------------|---------|-----------|-----------|
| Cpd 1: C22 H24 N4 O; 2.419 | 67.71     | -0.18            | C22 H24 N4 O | 2.419   | 360.195   | 360.1949  |

| Obs. m/z | Obs. RT | Obs. Mass | Tgt Formula  | Tgt Mass | Tgt Mass Error (ppm) | RT Diff.        | Find Cpds Algorithm |
|----------|---------|-----------|--------------|----------|----------------------|-----------------|---------------------|
| 361.2026 | 2.419   | 360.1949  | C22 H24 N4 O | 360.195  | -0.18                | Find By Formula |                     |

Compound Chromatograms

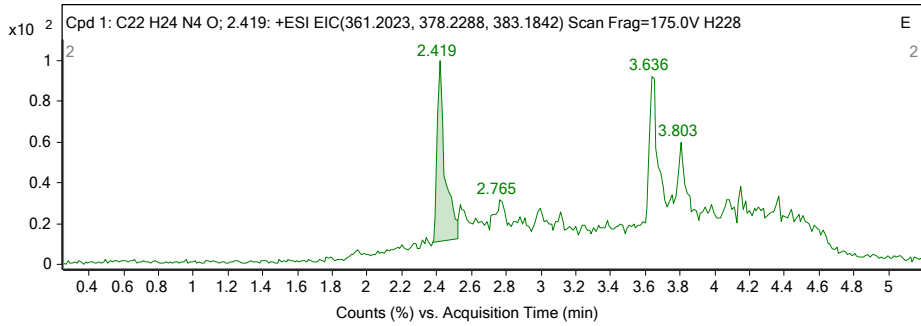

MS Zoomed Spectrum



10-(4-fluorophenyl)-6,7-dihydro-5H-pyrimido[5,4-c]carbazol-2-amine (7).  
<sup>1</sup>H NMR

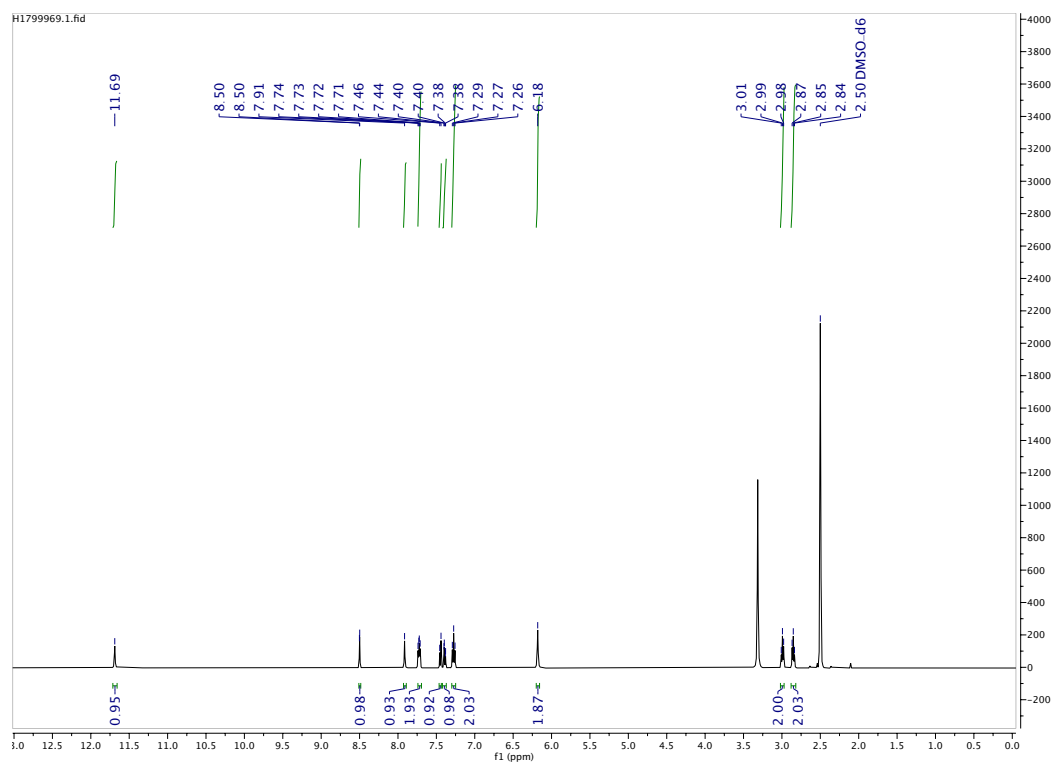

<sup>13</sup>C NMR

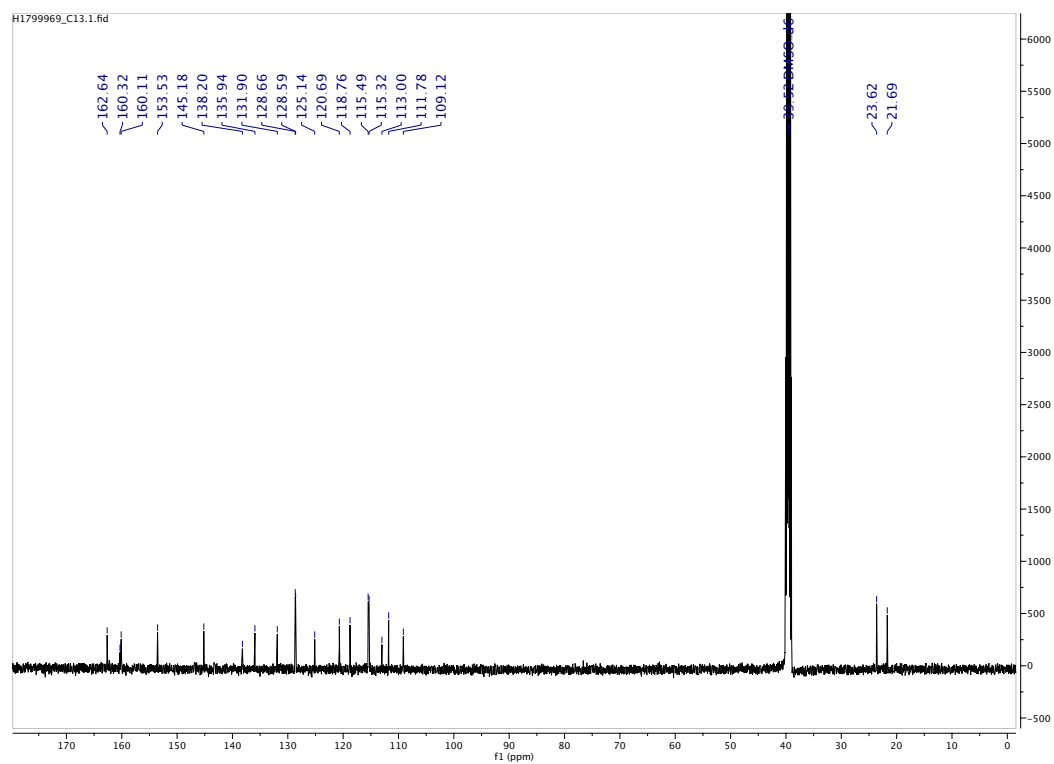

# LC Chromatogram

MaxPeak: 100.00%  
Ret\_Time: 1.093 min

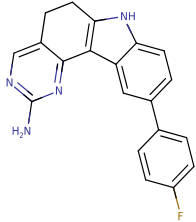

Mol Wt **330.36**  
Exact Mass **330.15**

| # | Time  | Area%  |
|---|-------|--------|
| 1 | 1.093 | 100.00 |

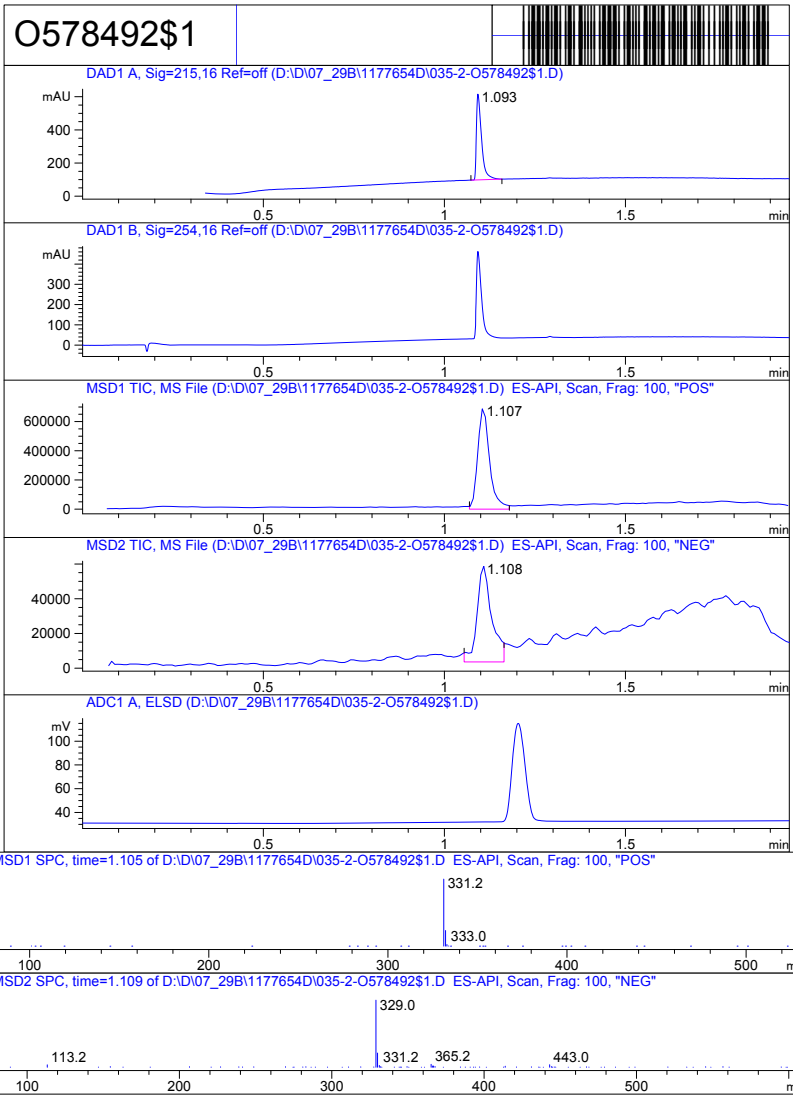

Inj.Date 7/29/2019

N

Vial 2

-7-

Acq. Method C:\Chem32\--> -->

Target Compound Screening Report

|                                 |                                        |                               |                                                     |
|---------------------------------|----------------------------------------|-------------------------------|-----------------------------------------------------|
| <b>Data File</b>                | H1799969.d                             | <b>Sample Name</b>            | H1799969                                            |
| <b>Sample Type</b>              | Sample                                 | <b>Position</b>               | P1-B4                                               |
| <b>Instrument Name</b>          | Instrument 1                           | <b>User Name</b>              | Denis V.Bylina                                      |
| <b>Acq Method</b>               | Fast_Gradient_HRMS_pos_Lock_08272019.m | <b>Acquired Time</b>          | 5/7/2021 7:02:37 PM (UTC+03:00)                     |
| <b>IRM Calibration Status</b>   | Success                                | <b>DA Method</b>              | Fast_Gradient_HRMS_pos_Lock_08272019.m              |
| <b>Comment</b>                  |                                        |                               |                                                     |
| <b>Sample Group</b>             |                                        | <b>Info.</b>                  |                                                     |
| <b>MFC</b>                      | C20H15FN4                              | <b>Stream Name</b>            | LC 1                                                |
| <b>Acquisition Time (Local)</b> | 5/7/2021 7:02:37 PM (UTC+03:00)        | <b>Acquisition SW Version</b> | 6200 series TOF/6500 series Q-TOF B.08.00 (B8058.0) |
| <b>TOF Driver Version</b>       | 8.00.00                                | <b>TOF Firmware Version</b>   | 8.643                                               |
| <b>Tune Mass Range Max.</b>     | 1700                                   |                               |                                                     |

Compound Table

| Label                      | Tgt Score | Mass Error (ppm) | Tgt Formula  | Obs. RT | Ref. Mass | Obs. Mass |
|----------------------------|-----------|------------------|--------------|---------|-----------|-----------|
| Cpd 1: C20 H15 F N4; 2.482 | 94.69     | -0.37            | C20 H15 F N4 | 2.482   | 330.1281  | 330.128   |

| Obs. m/z | Obs. RT | Obs. Mass | Tgt Formula  | Tgt Mass | Tgt Mass Error (ppm) | RT Diff.        | Find Cpds Algorithm |
|----------|---------|-----------|--------------|----------|----------------------|-----------------|---------------------|
| 331.1352 | 2.482   | 330.128   | C20 H15 F N4 | 330.1281 | -0.37                | Find By Formula |                     |

Compound Chromatograms

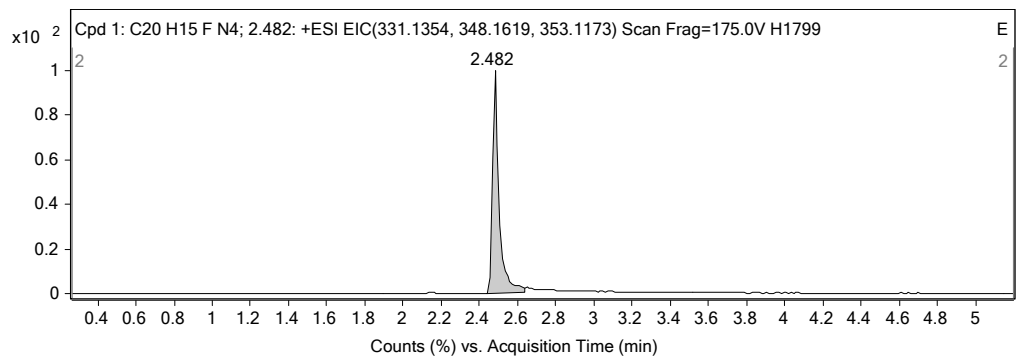

MS Zoomed Spectrum

11-(4-fluorophenyl)-5,6,7,8-tetrahydropyrimido[4',5':3,4]cyclohepta[1,2-b]indol-2-amine (**8**).  
<sup>1</sup>H NMR

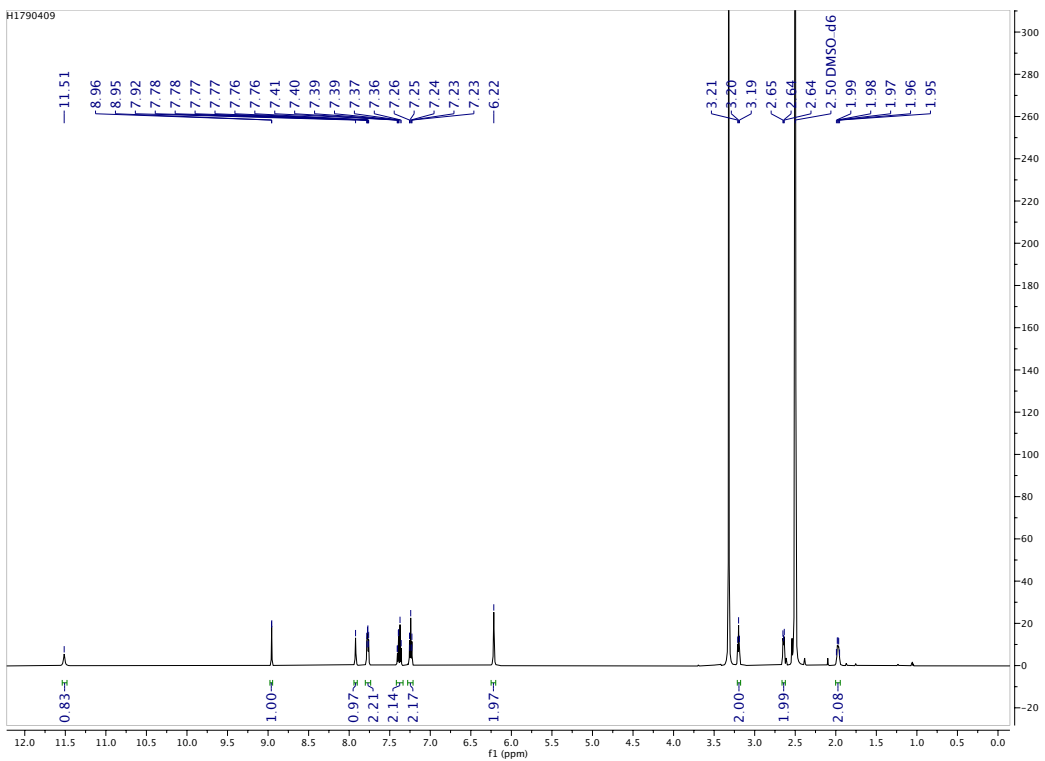

<sup>13</sup>C NMR

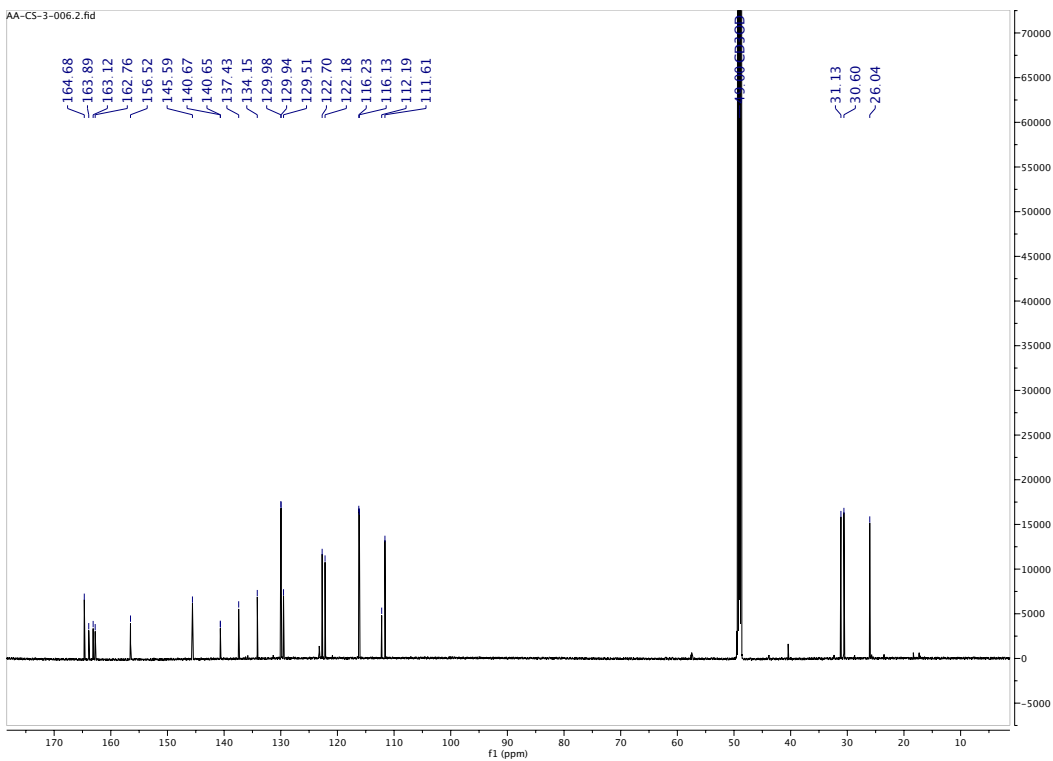

# LC Chromatogram

MaxPeak: 100.00%  
Ret\_Time: 1.043 min

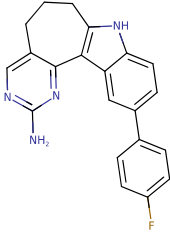

Mol Wt 344.38

Exact Mass 344.17

| # | Time  | Area%  |
|---|-------|--------|
| 1 | 1.043 | 100.00 |

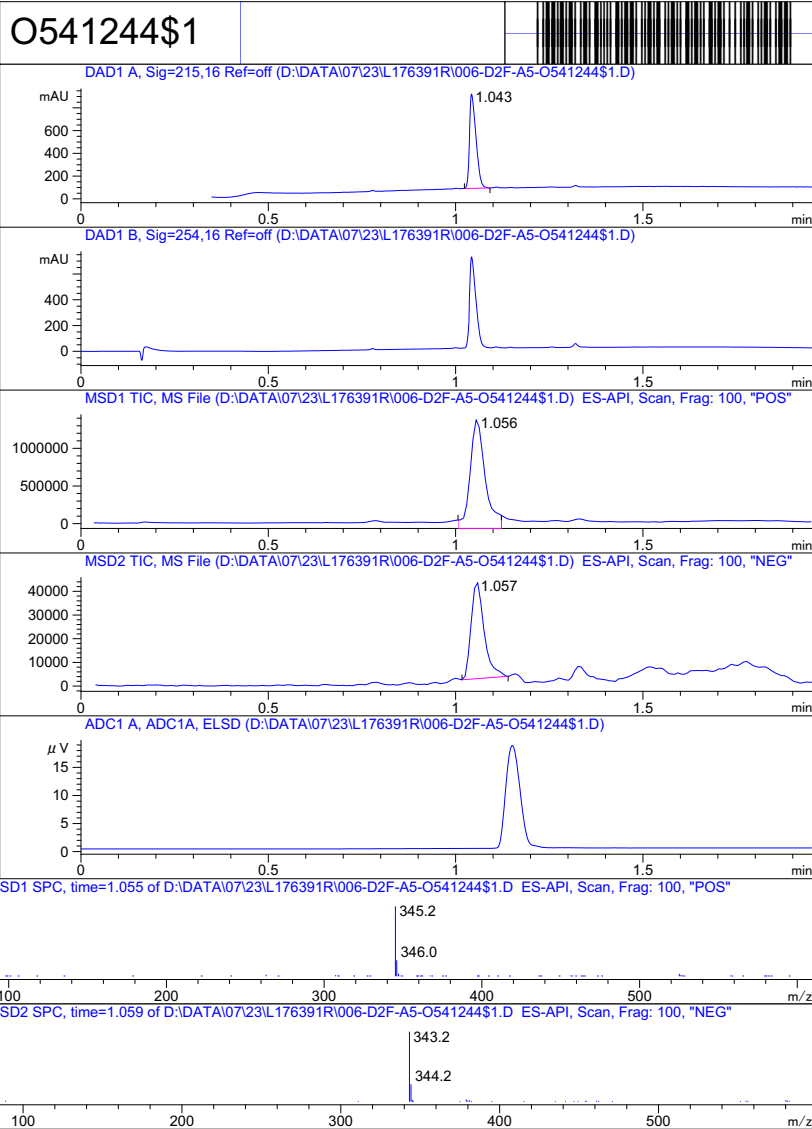

Inj.Date 7/23/2019

LB <invalid> -11-

Acq. Method C:\Chem32\ -> ->

Target Compound Screening Report

|                                 |                                        |                               |                                                     |
|---------------------------------|----------------------------------------|-------------------------------|-----------------------------------------------------|
| <b>Data File</b>                | H1790409.d                             | <b>Sample Name</b>            | H1790409                                            |
| <b>Sample Type</b>              | Sample                                 | <b>Position</b>               | P1-B5                                               |
| <b>Instrument Name</b>          | Instrument 1                           | <b>User Name</b>              | Denis V.Bylina                                      |
| <b>Acq Method</b>               | Fast_Gradient_HRMS_pos_Lock_08272019.m | <b>Acquired Time</b>          | 5/7/2021 7:08:41 PM (UTC+03:00)                     |
| <b>IRM Calibration Status</b>   | Success                                | <b>DA Method</b>              | Fast_Gradient_HRMS_pos_Lock_08272019.m              |
| <b>Comment</b>                  |                                        |                               |                                                     |
| <b>Sample Group</b>             |                                        | <b>Info.</b>                  |                                                     |
| <b>MFC</b>                      | C21H17FN4                              | <b>Stream Name</b>            | LC 1                                                |
| <b>Acquisition Time (Local)</b> | 5/7/2021 7:08:41 PM (UTC+03:00)        | <b>Acquisition SW Version</b> | 6200 series TOF/6500 series Q-TOF B.08.00 (B8058.0) |
| <b>TOF Driver Version</b>       | 8.00.00                                | <b>TOF Firmware Version</b>   | 8.643                                               |
| <b>Tune Mass Range Max.</b>     | 1700                                   |                               |                                                     |

Compound Table

| Label                      | Tgt Score | Mass Error (ppm) | Tgt Formula  | Obs. RT | Ref. Mass | Obs. Mass |
|----------------------------|-----------|------------------|--------------|---------|-----------|-----------|
| Cpd 1: C21 H17 F N4; 2.509 | 95.81     | 0.28             | C21 H17 F N4 | 2.509   | 344.1437  | 344.1438  |

| Obs. m/z | Obs. RT | Obs. Mass | Tgt Formula  | Tgt Mass | Tgt Mass Error (ppm) | RT Diff.        | Find Cpds Algorithm |
|----------|---------|-----------|--------------|----------|----------------------|-----------------|---------------------|
| 345.1511 | 2.509   | 344.1438  | C21 H17 F N4 | 344.1437 | 0.28                 | Find By Formula |                     |

Compound Chromatograms

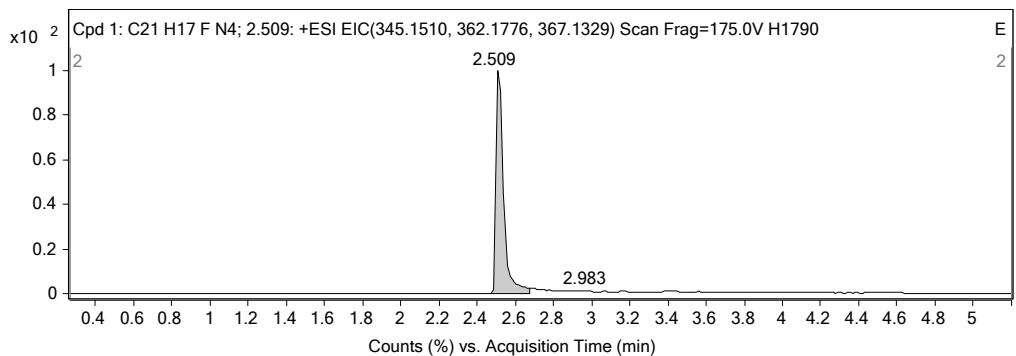

MS Zoomed Spectrum

12-(4-fluorophenyl)-6,7,8,9-tetrahydro-5H-pyrimido[4',5':3,4]cycloocta[1,2-b]indol-2-amine  
(9).

<sup>1</sup>H NMR

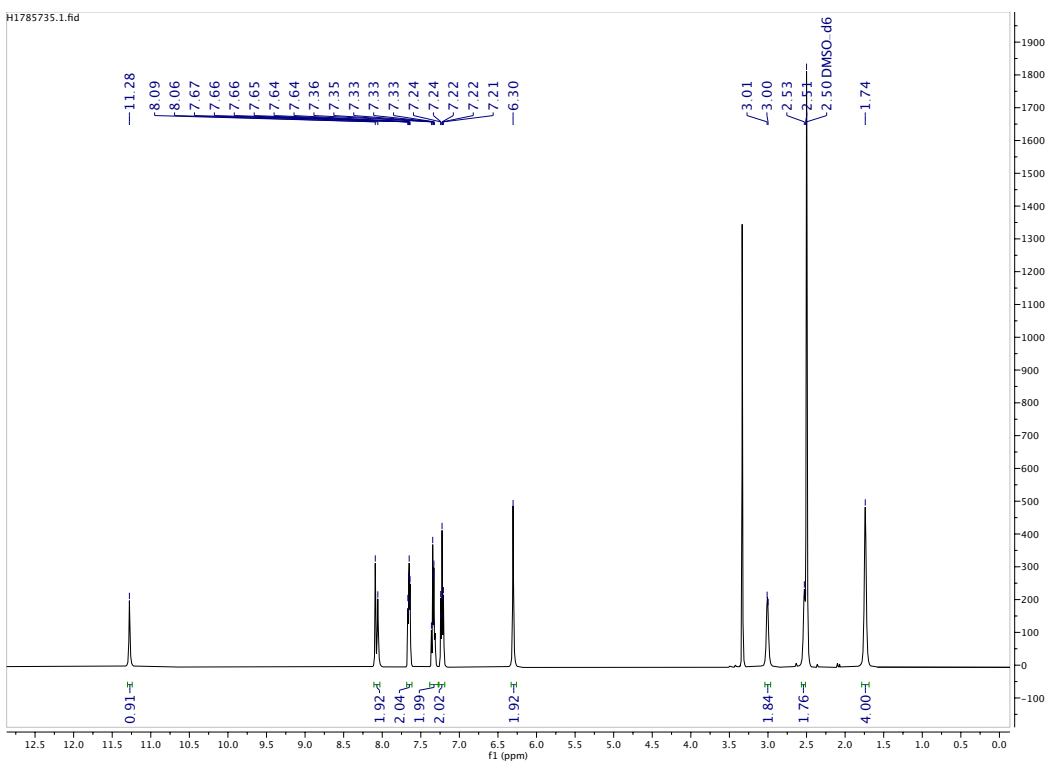

<sup>13</sup>C NMR

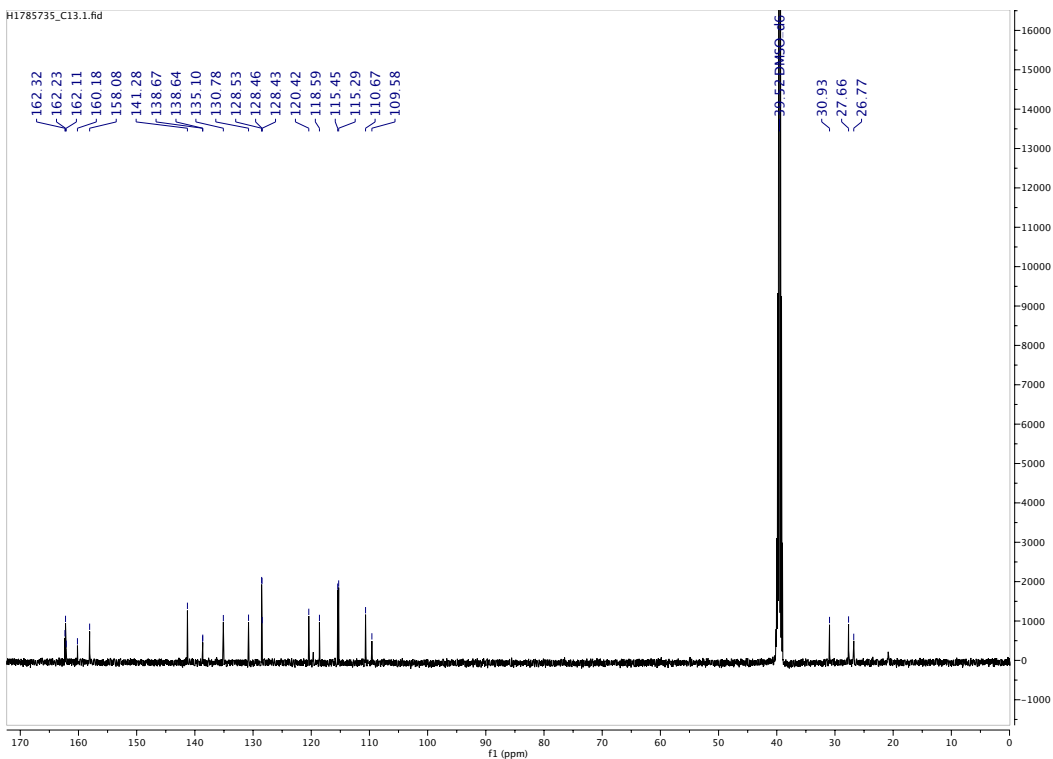

# LC Chromatogram

MaxPeak: 100.00%  
Ret\_Time: 1.169 min

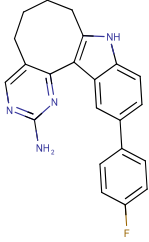

Mol Wt 358.41  
Exact Mass 358.19

| # | Time  | Area%  |
|---|-------|--------|
| 1 | 1.169 | 100.00 |

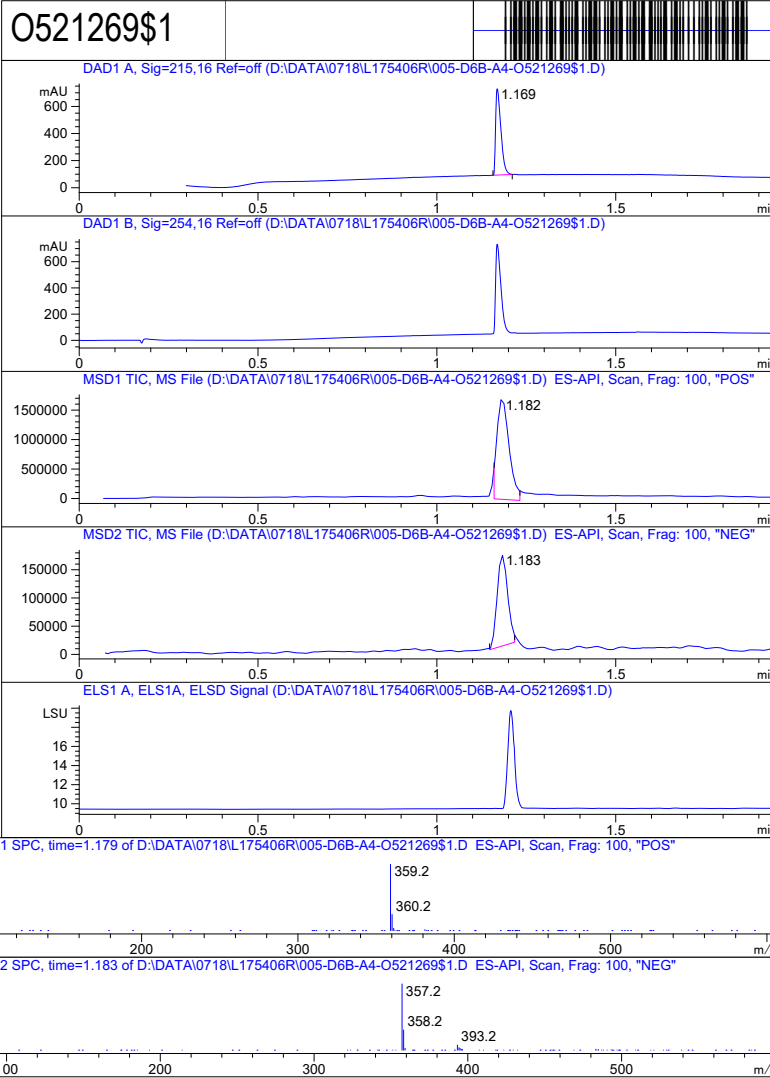

Inj.Date 7/18/2019

LT <invalid> 13

Acq. Method C:\Chem32\ -> ->



Target Compound Screening Report

|                                 |                                        |                               |                                                     |
|---------------------------------|----------------------------------------|-------------------------------|-----------------------------------------------------|
| <b>Data File</b>                | H1785735.d                             | <b>Sample Name</b>            | H1785735                                            |
| <b>Sample Type</b>              | Sample                                 | <b>Position</b>               | P1-A7                                               |
| <b>Instrument Name</b>          | Instrument 1                           | <b>User Name</b>              | Denis V.Bylina                                      |
| <b>Acq Method</b>               | Fast_Gradient_HRMS_pos_Lock_08272019.m | <b>Acquired Time</b>          | 5/7/2021 6:26:15 PM (UTC+03:00)                     |
| <b>IRM Calibration Status</b>   | Success                                | <b>DA Method</b>              | Fast_Gradient_HRMS_pos_Lock_08272019.m              |
| <b>Comment</b>                  |                                        |                               |                                                     |
| <b>Sample Group</b>             |                                        | <b>Info.</b>                  |                                                     |
| <b>MFC</b>                      | C22H19FN4                              | <b>Stream Name</b>            | LC 1                                                |
| <b>Acquisition Time (Local)</b> | 5/7/2021 6:26:15 PM (UTC+03:00)        | <b>Acquisition SW Version</b> | 6200 series TOF/6500 series Q-TOF B.08.00 (B8058.0) |
| <b>TOF Driver Version</b>       | 8.00.00                                | <b>TOF Firmware Version</b>   | 8.643                                               |
| <b>Tune Mass Range Max.</b>     | 1700                                   |                               |                                                     |

Compound Table

| Label                      | Tgt Score | Mass Error (ppm) | Tgt Formula  | Obs. RT | Ref. Mass | Obs. Mass |
|----------------------------|-----------|------------------|--------------|---------|-----------|-----------|
| Cpd 1: C22 H19 F N4; 2.572 | 96.64     | -0.12            | C22 H19 F N4 | 2.572   | 358.1594  | 358.1593  |

| Obs. m/z | Obs. RT | Obs. Mass | Tgt Formula  | Tgt Mass | Tgt Mass Error (ppm) | RT Diff.        | Find Cpds Algorithm |
|----------|---------|-----------|--------------|----------|----------------------|-----------------|---------------------|
| 359.1668 | 2.572   | 358.1593  | C22 H19 F N4 | 358.1594 | -0.12                | Find By Formula |                     |

Compound Chromatograms

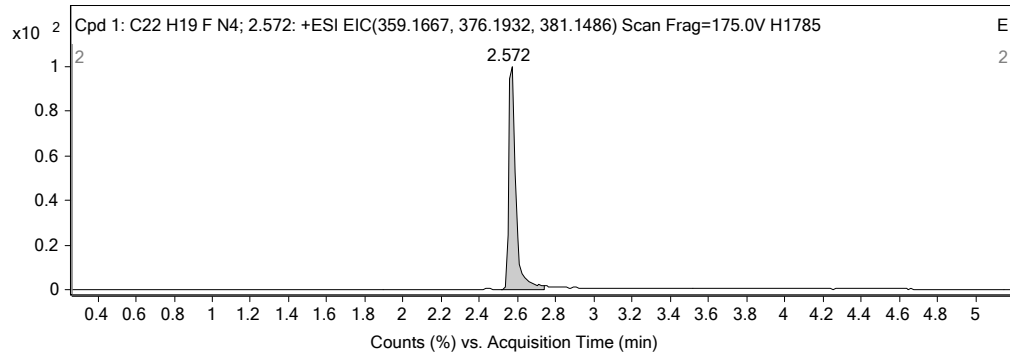

MS Zoomed Spectrum

10-(1-methyl-1H-pyrazol-4-yl)-6,7-dihydro-5H-pyrimido[5,4-c]carbazol-2-amine (12).  
<sup>1</sup>H NMR

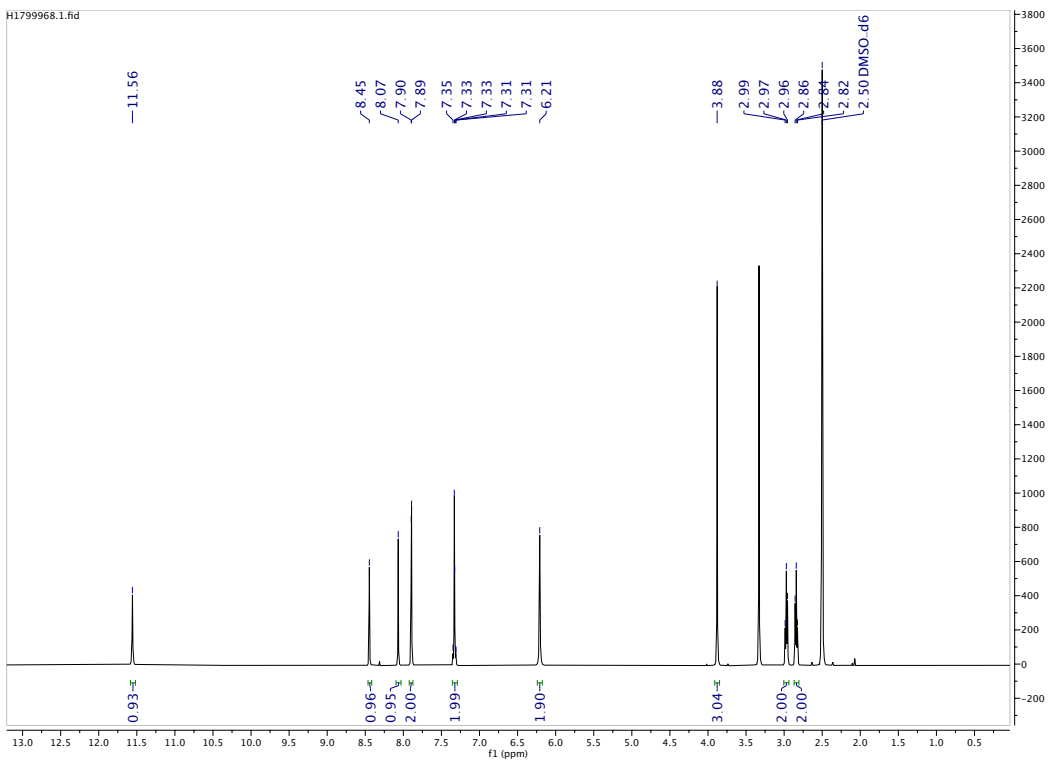

<sup>13</sup>C NMR

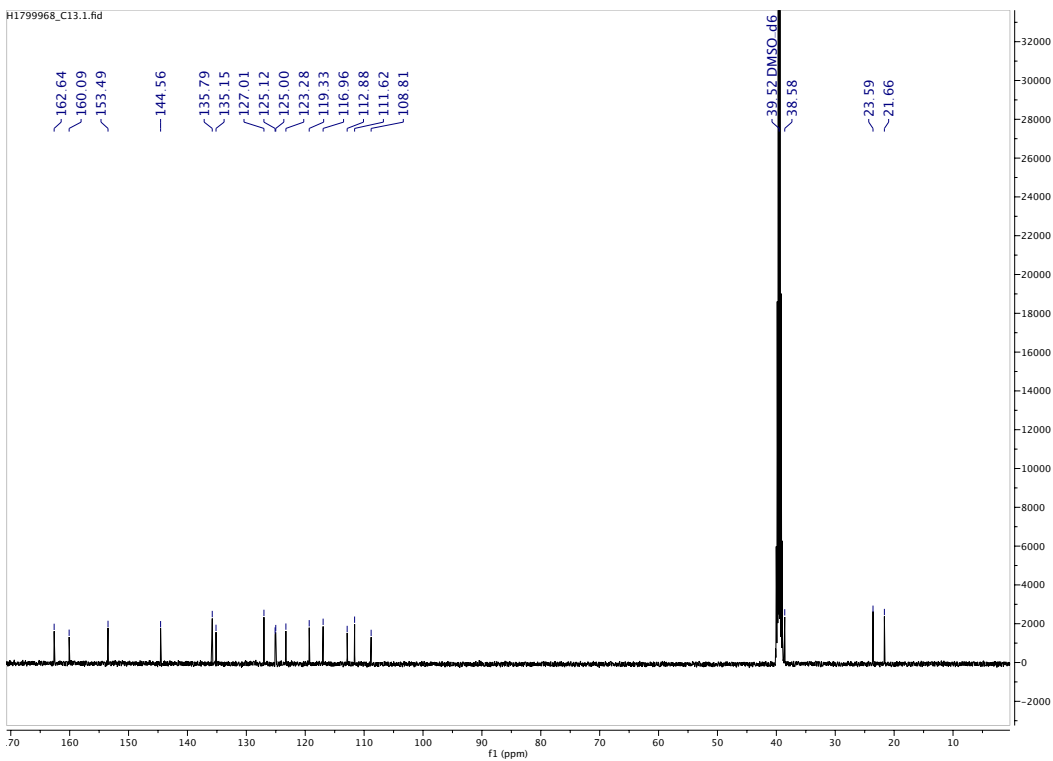

# LC Chromatogram

MaxPeak: 100.00%  
Ret\_Time: 0.885 min

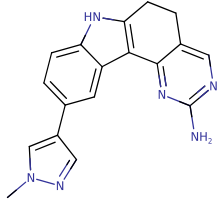

Mol Wt 316.36  
Exact Mass 316.16

| # | Time  | Area%  |
|---|-------|--------|
| 1 | 0.885 | 100.00 |

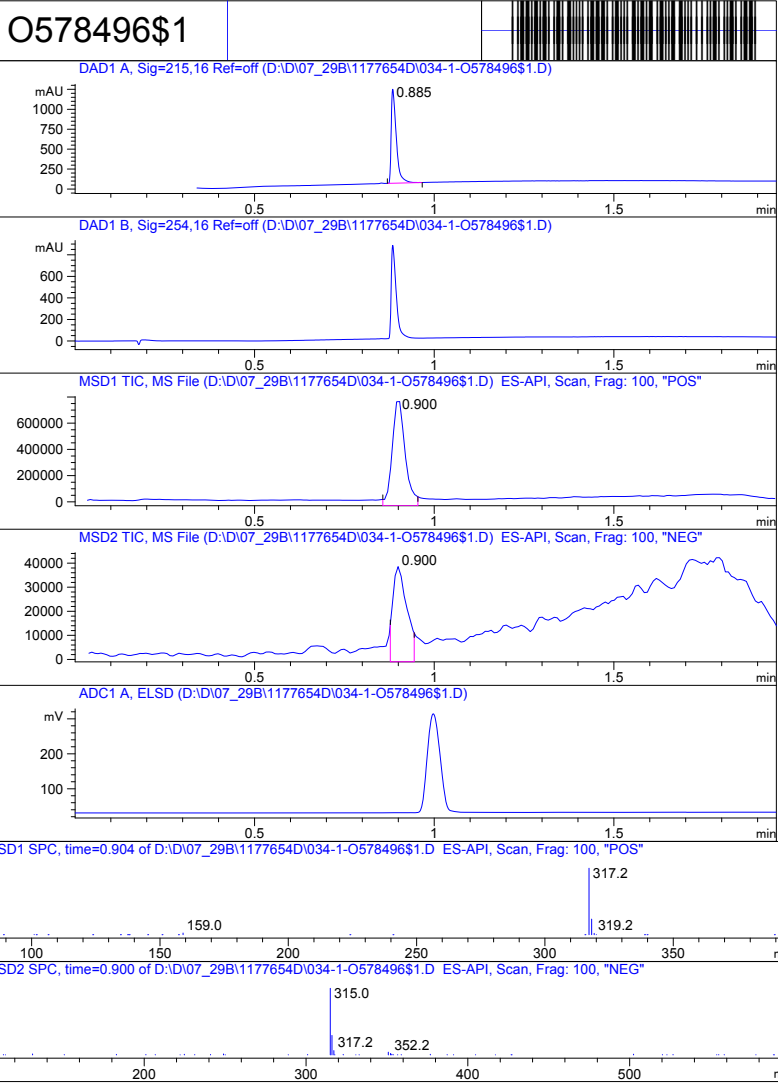

Inj.Date 7/29/2019

N

Vial 1

-7-

Acq. Method C:\Chem32\ -> ->

Target Compound Screening Report

|                                 |                                        |                               |                                                     |
|---------------------------------|----------------------------------------|-------------------------------|-----------------------------------------------------|
| <b>Data File</b>                | H1799968.d                             | <b>Sample Name</b>            | H1799968                                            |
| <b>Sample Type</b>              | Sample                                 | <b>Position</b>               | P1-A2                                               |
| <b>Instrument Name</b>          | Instrument 1                           | <b>User Name</b>              | Denis V.Bylina                                      |
| <b>Acq Method</b>               | Fast_Gradient_HRMS_pos_Lock_08272019.m | <b>Acquired Time</b>          | 5/7/2021 5:55:50 PM (UTC+03:00)                     |
| <b>IRM Calibration Status</b>   | Success                                | <b>DA Method</b>              | Fast_Gradient_HRMS_pos_Lock_08272019.m              |
| <b>Comment</b>                  |                                        |                               |                                                     |
| <b>Sample Group</b>             |                                        | <b>Info.</b>                  |                                                     |
| <b>MFC</b>                      | C18H16N6                               | <b>Stream Name</b>            | LC 1                                                |
| <b>Acquisition Time (Local)</b> | 5/7/2021 5:55:50 PM (UTC+03:00)        | <b>Acquisition SW Version</b> | 6200 series TOF/6500 series Q-TOF B.08.00 (B8058.0) |
| <b>TOF Driver Version</b>       | 8.00.00                                | <b>TOF Firmware Version</b>   | 8.643                                               |
| <b>Tune Mass Range Max.</b>     | 1700                                   |                               |                                                     |

Compound Table

| Label                    | Tgt Score | Mass Error (ppm) | Tgt Formula | Obs. RT | Ref. Mass | Obs. Mass |
|--------------------------|-----------|------------------|-------------|---------|-----------|-----------|
| Cpd 1: C18 H16 N6; 2.092 | 77.64     | 4.59             | C18 H16 N6  | 2.092   | 316.1436  | 316.1451  |

| Obs. m/z | Obs. RT | Obs. Mass | Tgt Formula | Tgt Mass | Tgt Mass Error (ppm) | RT Diff.        | Find Cpds Algorithm |
|----------|---------|-----------|-------------|----------|----------------------|-----------------|---------------------|
| 317.1522 | 2.092   | 316.1451  | C18 H16 N6  | 316.1436 | 4.59                 | Find By Formula |                     |

Compound Chromatograms

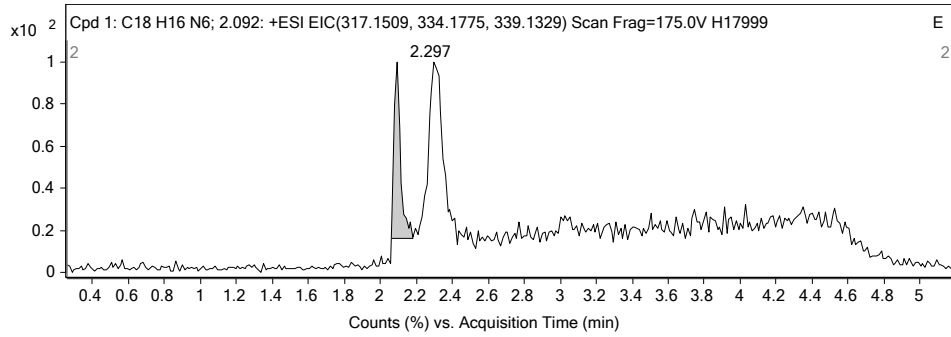

MS Zoomed Spectrum

11-(1-methyl-1H-pyrazol-4-yl)-5,6,7,8-tetrahydropyrimido[4',5':3,4]cyclohepta[1,2-b]indol-2-amine (13).

<sup>1</sup>H NMR

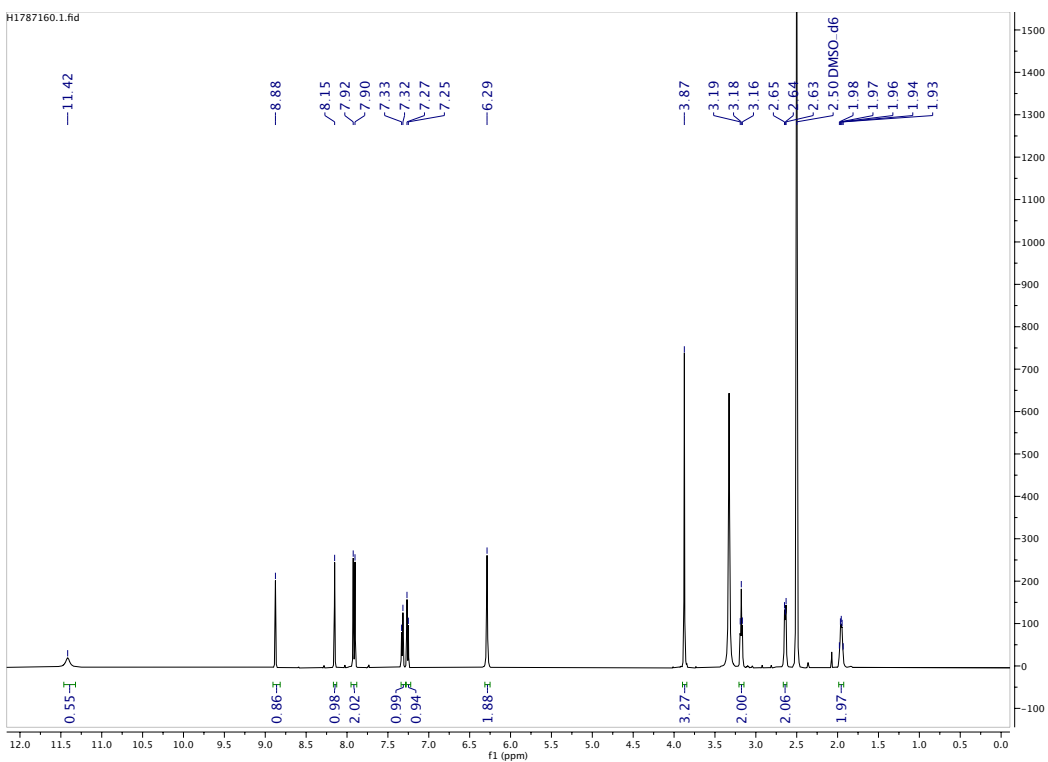

<sup>13</sup>C NMR

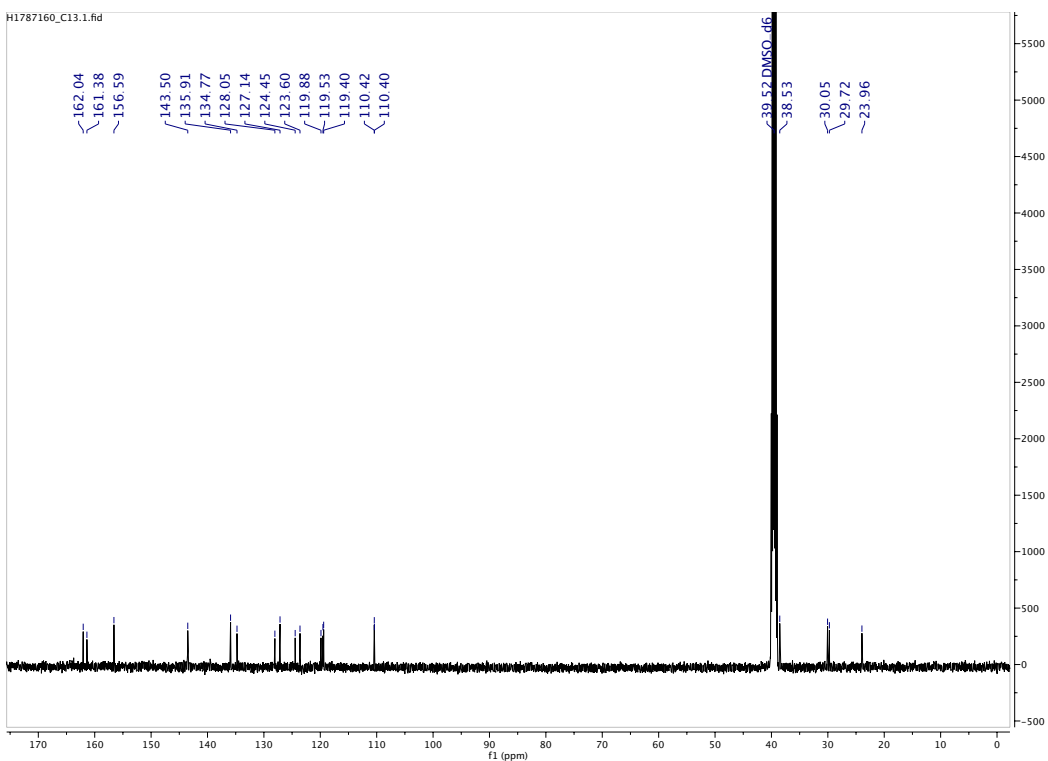

# LC Chromatogram

MaxPeak: 100.00%  
Ret\_Time: 0.916 min

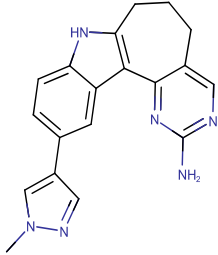

Mol Wt 330.39  
Exact Mass 330.18

| # | Time  | Area%  |
|---|-------|--------|
| 1 | 0.916 | 100.00 |

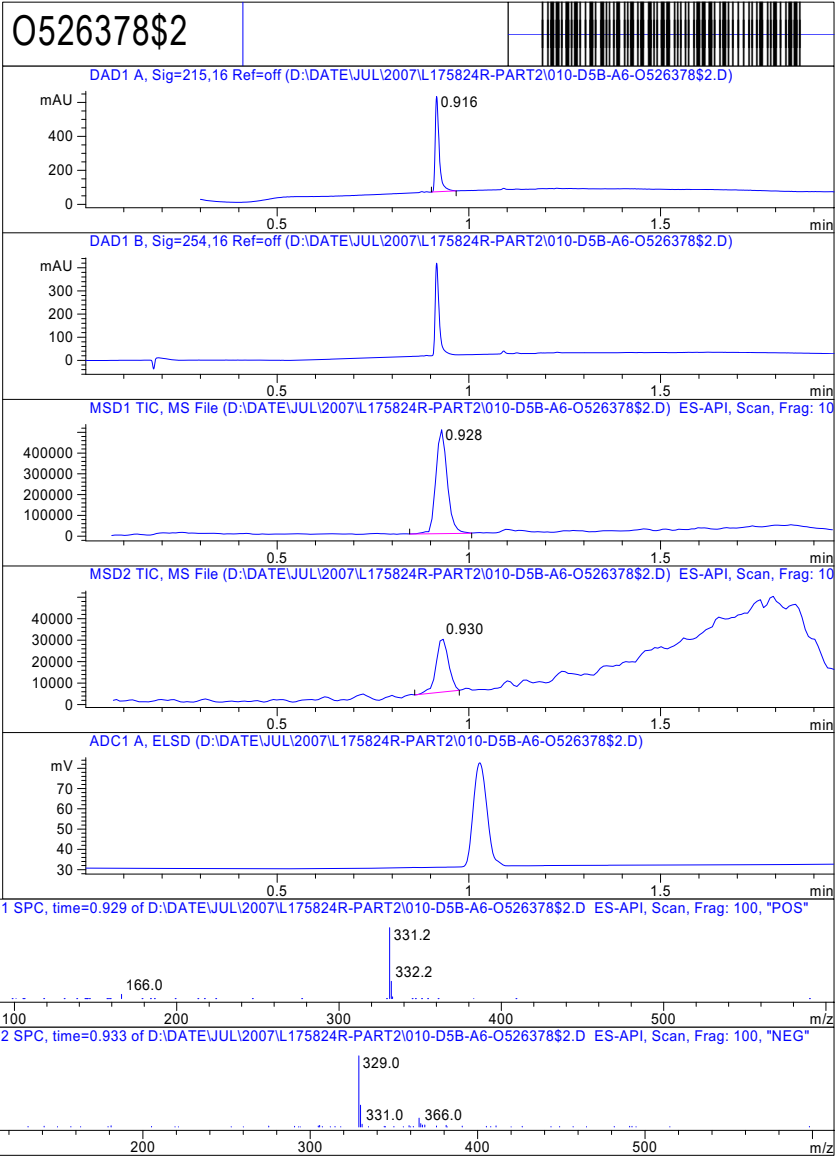

Inj.Date 7/19/2019

Y

<invalid> -7-

Acq. Method C:\Chem32\ -> ->

Target Compound Screening Report

|                                 |                                        |                               |                                                     |
|---------------------------------|----------------------------------------|-------------------------------|-----------------------------------------------------|
| <b>Data File</b>                | H1787160.d                             | <b>Sample Name</b>            | H1787160                                            |
| <b>Sample Type</b>              | Sample                                 | <b>Position</b>               | P1-B2                                               |
| <b>Instrument Name</b>          | Instrument 1                           | <b>User Name</b>              | Denis V.Bylina                                      |
| <b>Acq Method</b>               | Fast_Gradient_HRMS_pos_Lock_08272019.m | <b>Acquired Time</b>          | 5/7/2021 6:50:30 PM (UTC+03:00)                     |
| <b>IRM Calibration Status</b>   | Success                                | <b>DA Method</b>              | Fast_Gradient_HRMS_pos_Lock_08272019.m              |
| <b>Comment</b>                  |                                        |                               |                                                     |
| <b>Sample Group</b>             |                                        | <b>Info.</b>                  |                                                     |
| <b>MFC</b>                      | C19H18N6                               | <b>Stream Name</b>            | LC 1                                                |
| <b>Acquisition Time (Local)</b> | 5/7/2021 6:50:30 PM (UTC+03:00)        | <b>Acquisition SW Version</b> | 6200 series TOF/6500 series Q-TOF B.08.00 (B8058.0) |
| <b>TOF Driver Version</b>       | 8.00.00                                | <b>TOF Firmware Version</b>   | 8.643                                               |
| <b>Tune Mass Range Max.</b>     | 1700                                   |                               |                                                     |

Compound Table

| Label                    | Tgt Score | Mass Error (ppm) | Tgt Formula | Obs. RT | Ref. Mass | Obs. Mass |
|--------------------------|-----------|------------------|-------------|---------|-----------|-----------|
| Cpd 1: C19 H18 N6; 2.154 | 77.33     | -2.38            | C19 H18 N6  | 2.154   | 330.1593  | 330.1585  |

| Obs. m/z | Obs. RT | Obs. Mass | Tgt Formula | Tgt Mass | Tgt Mass Error (ppm) | RT Diff.        | Find Cpd Algorithm |
|----------|---------|-----------|-------------|----------|----------------------|-----------------|--------------------|
| 331.1661 | 2.154   | 330.1585  | C19 H18 N6  | 330.1593 | -2.38                | Find By Formula |                    |

Compound Chromatograms

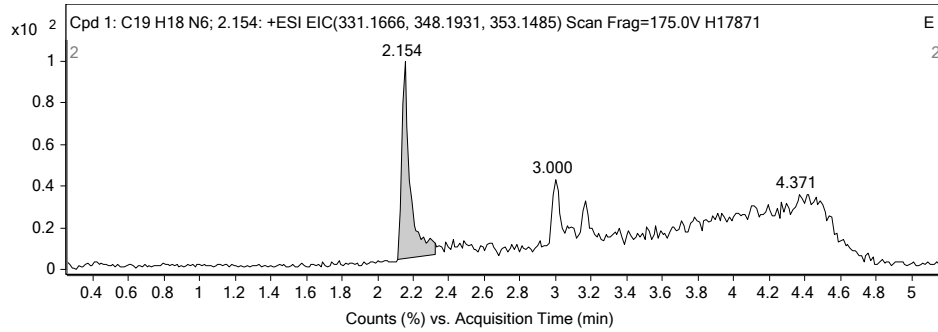

MS Zoomed Spectrum

*12-cyclopropyl-6,7,8,9-tetrahydro-5H-pyrimido[4',5':3,4]cycloocta[1,2-b]indol-2-amine (30).*  
<sup>1</sup>H NMR

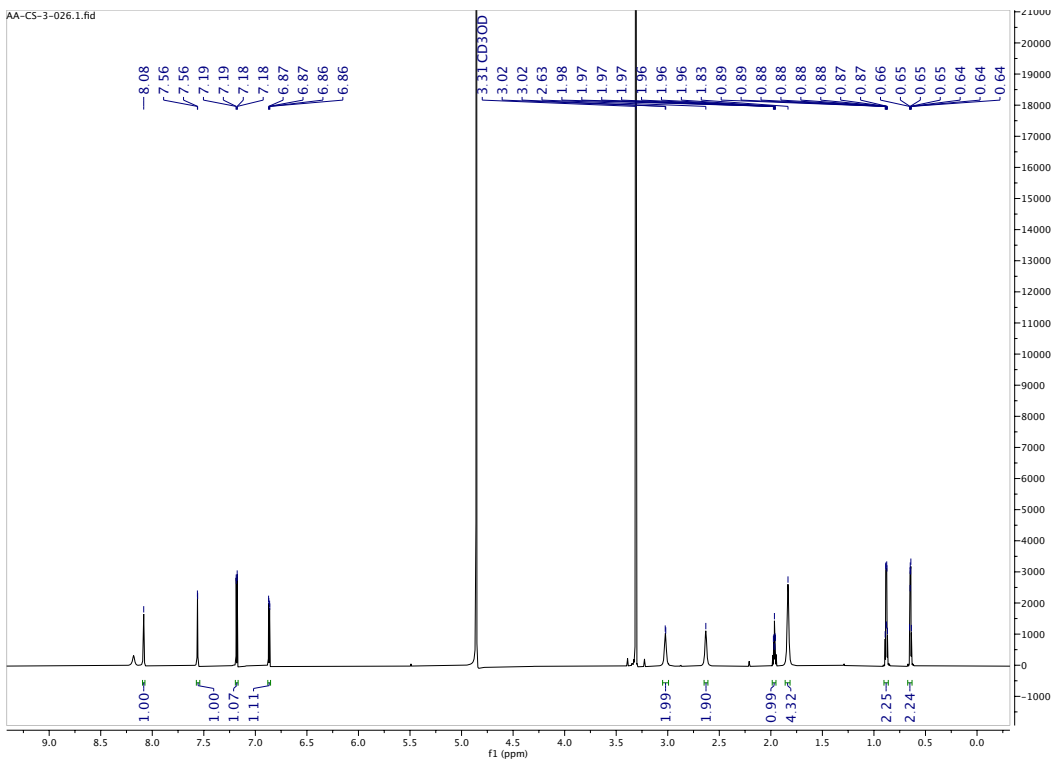

<sup>13</sup>C NMR

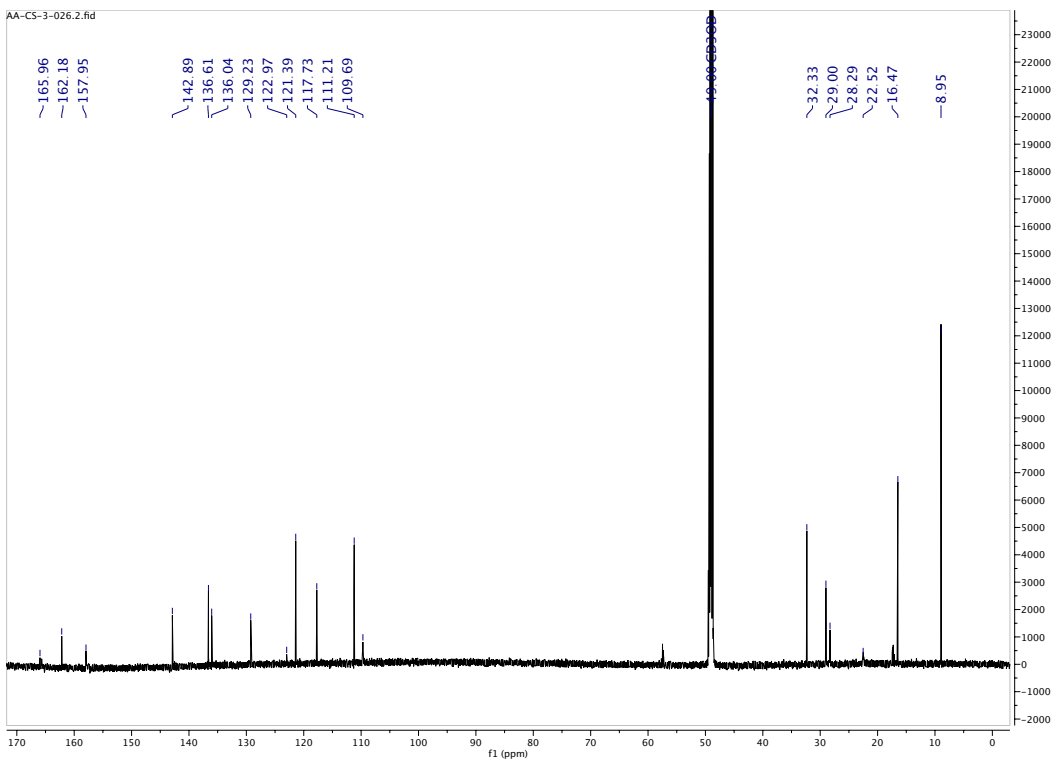



# LC Chromatogram

MaxPeak: 100.00%  
Ret\_Time: 1.083 min

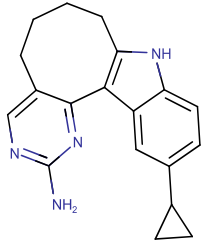

Mol Wt 304.39

Exact Mass 304.2

| # | Time  | Area%  |
|---|-------|--------|
| 1 | 1.083 | 100.00 |

O713582\$1

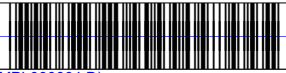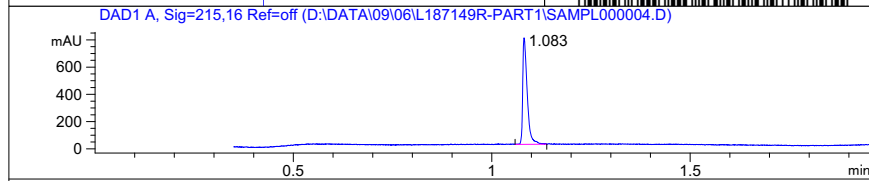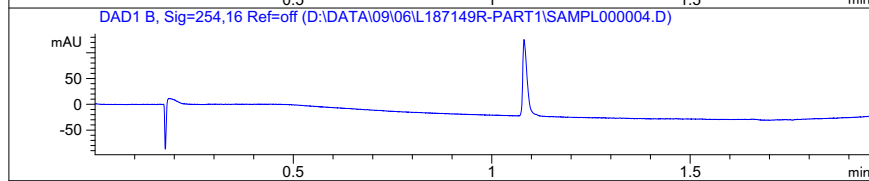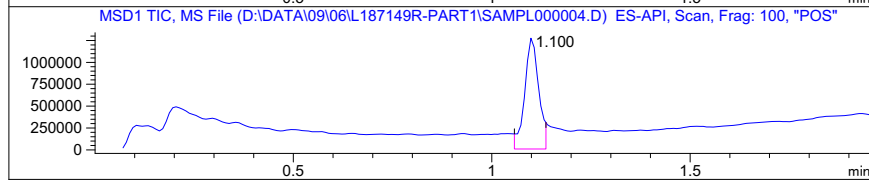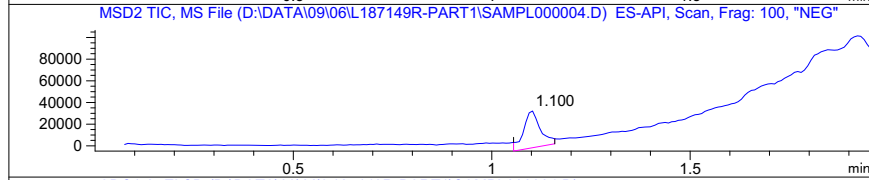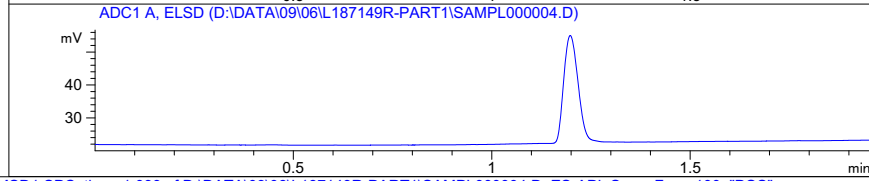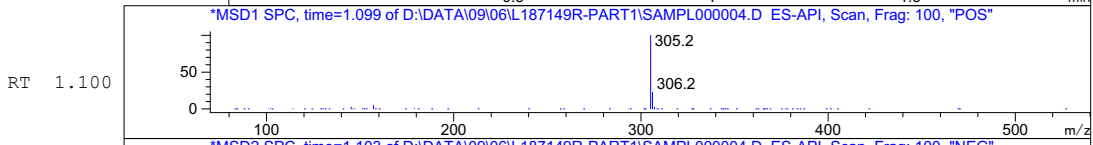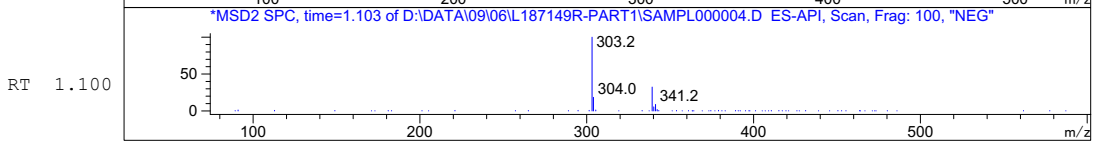

Inj.Date 9/6/2019

LB

P2-B-03

-3-

Acq. Method C:\CHEM32\-->

-->

# HRMS

AA-3-26 #760-807 RT: 3.28-3.49 AV: 48 NL: 1.44E9  
T: FTMS + c ESI Full ms [150.0000-2000.0000]

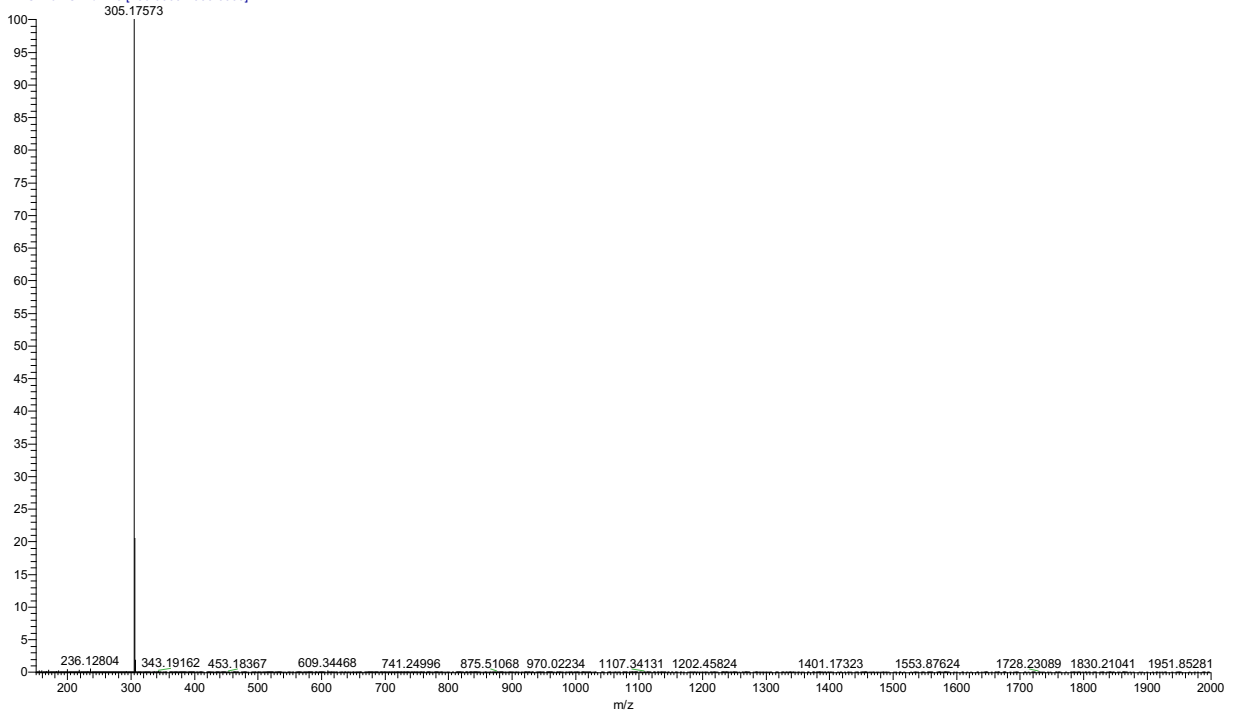

AA-3-26 #760-807 RT: 3.28-3.49 AV: 48 NL: 1.44E9  
T: FTMS + c ESI Full ms [150.0000-2000.0000]

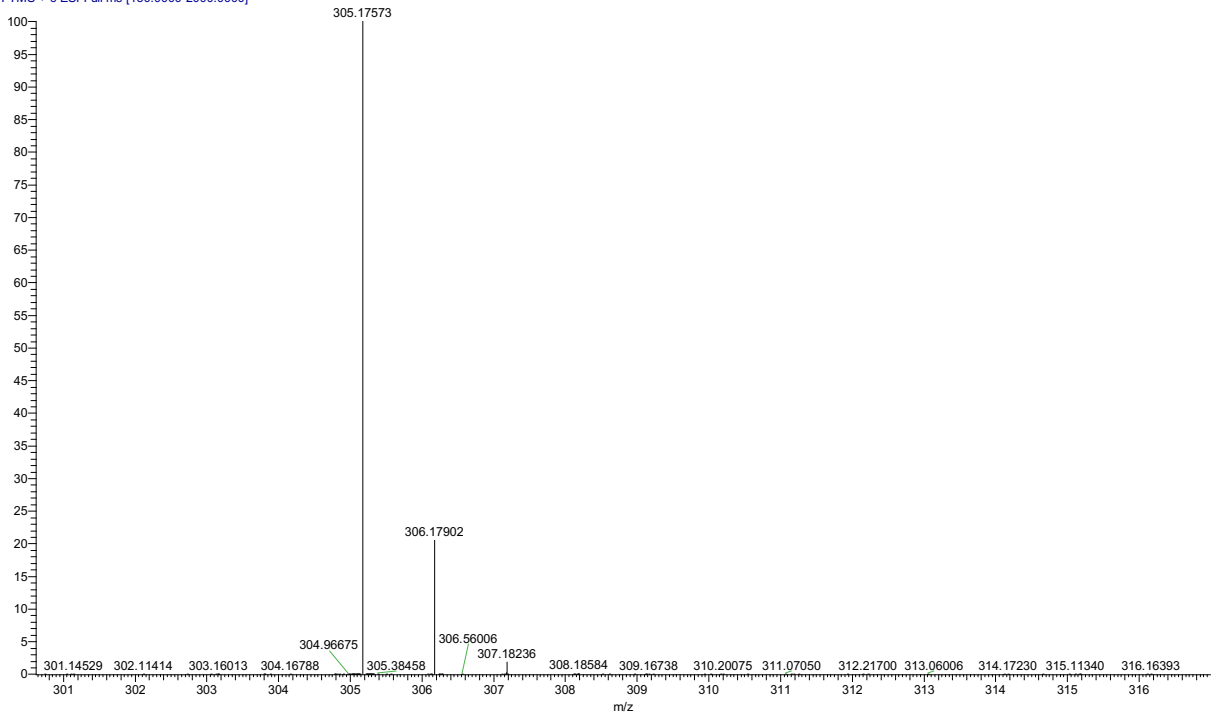

Supplement: jm2c00697_si_002.pdf [file jm2c00697_si_002.pdf]
